# Supplementary material for: Proteomic Network Analysis of Alzheimer’s Disease Cerebrospinal Fluid Reveals Alterations Associated with APOE ε4 Genotype and Atomoxetine Treatment
Source: PubMed Central journal article supplement — medRxiv. 2023 Oct 30:2023.10.29.23297651. Preprint. [Version 1] doi: 10.1101/2023.10.29.23297651 (PMC10635242; doi:10.1101/2023.10.29.23297651), 2023-10-30

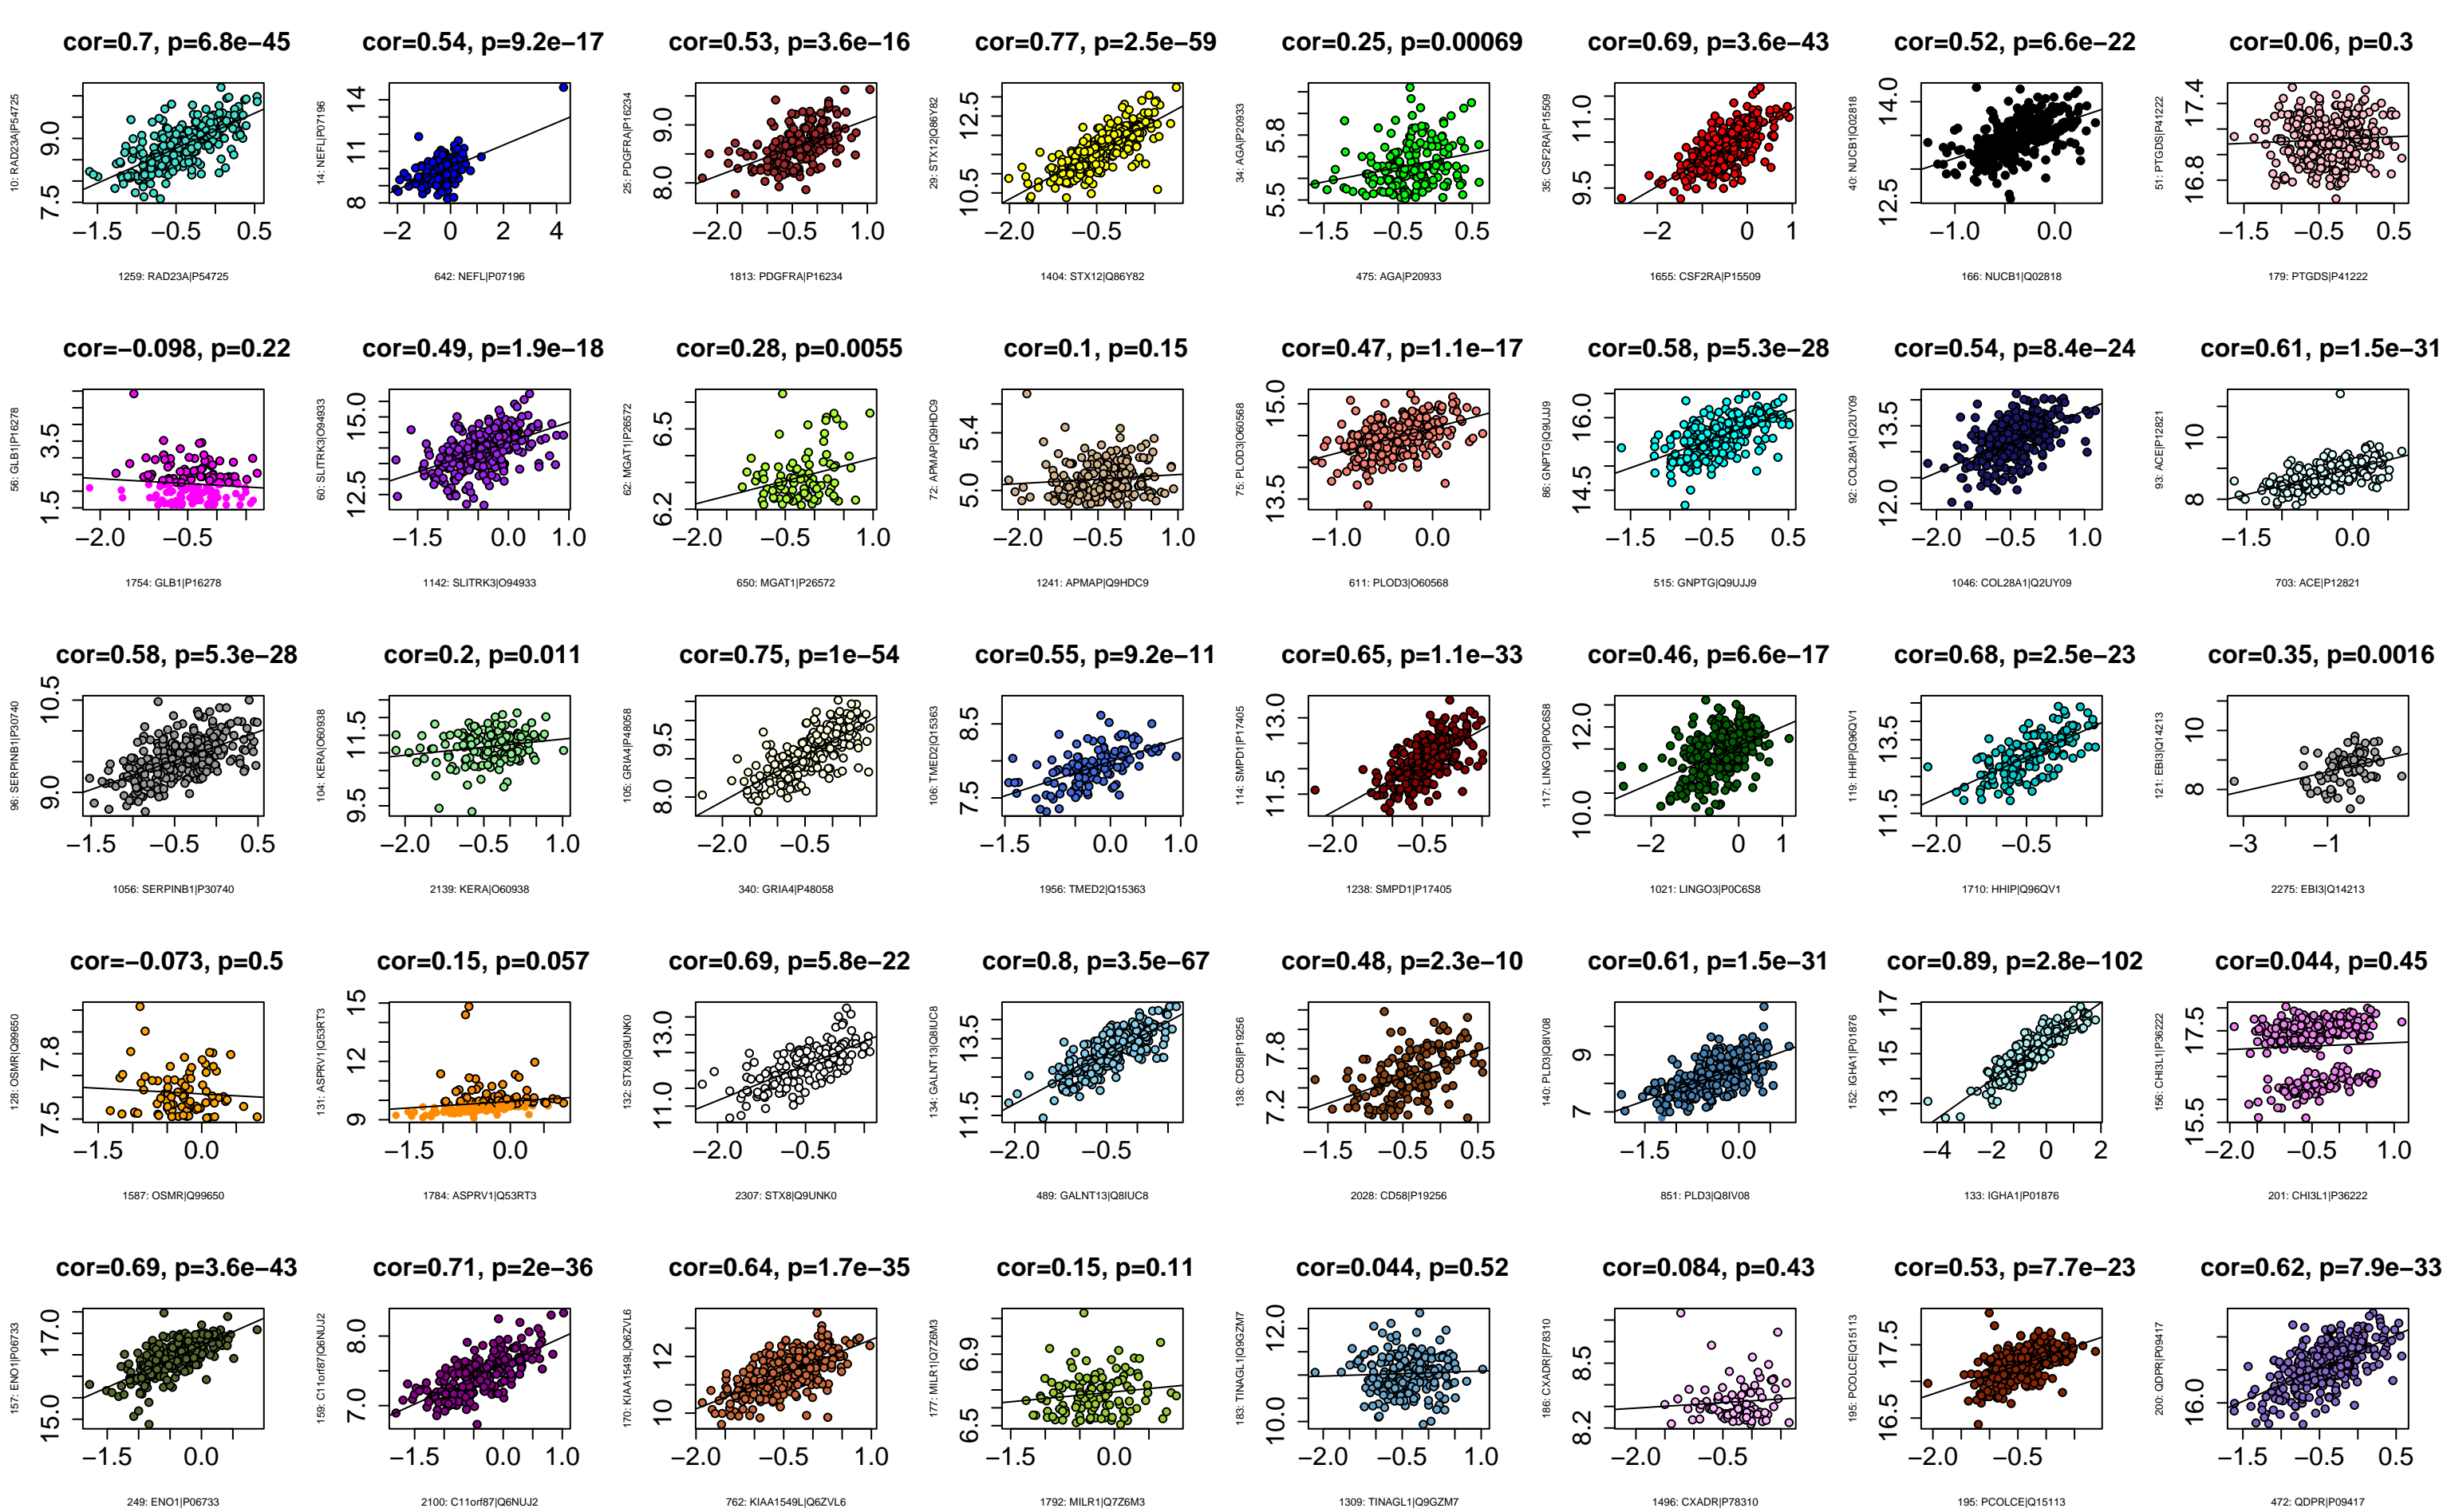

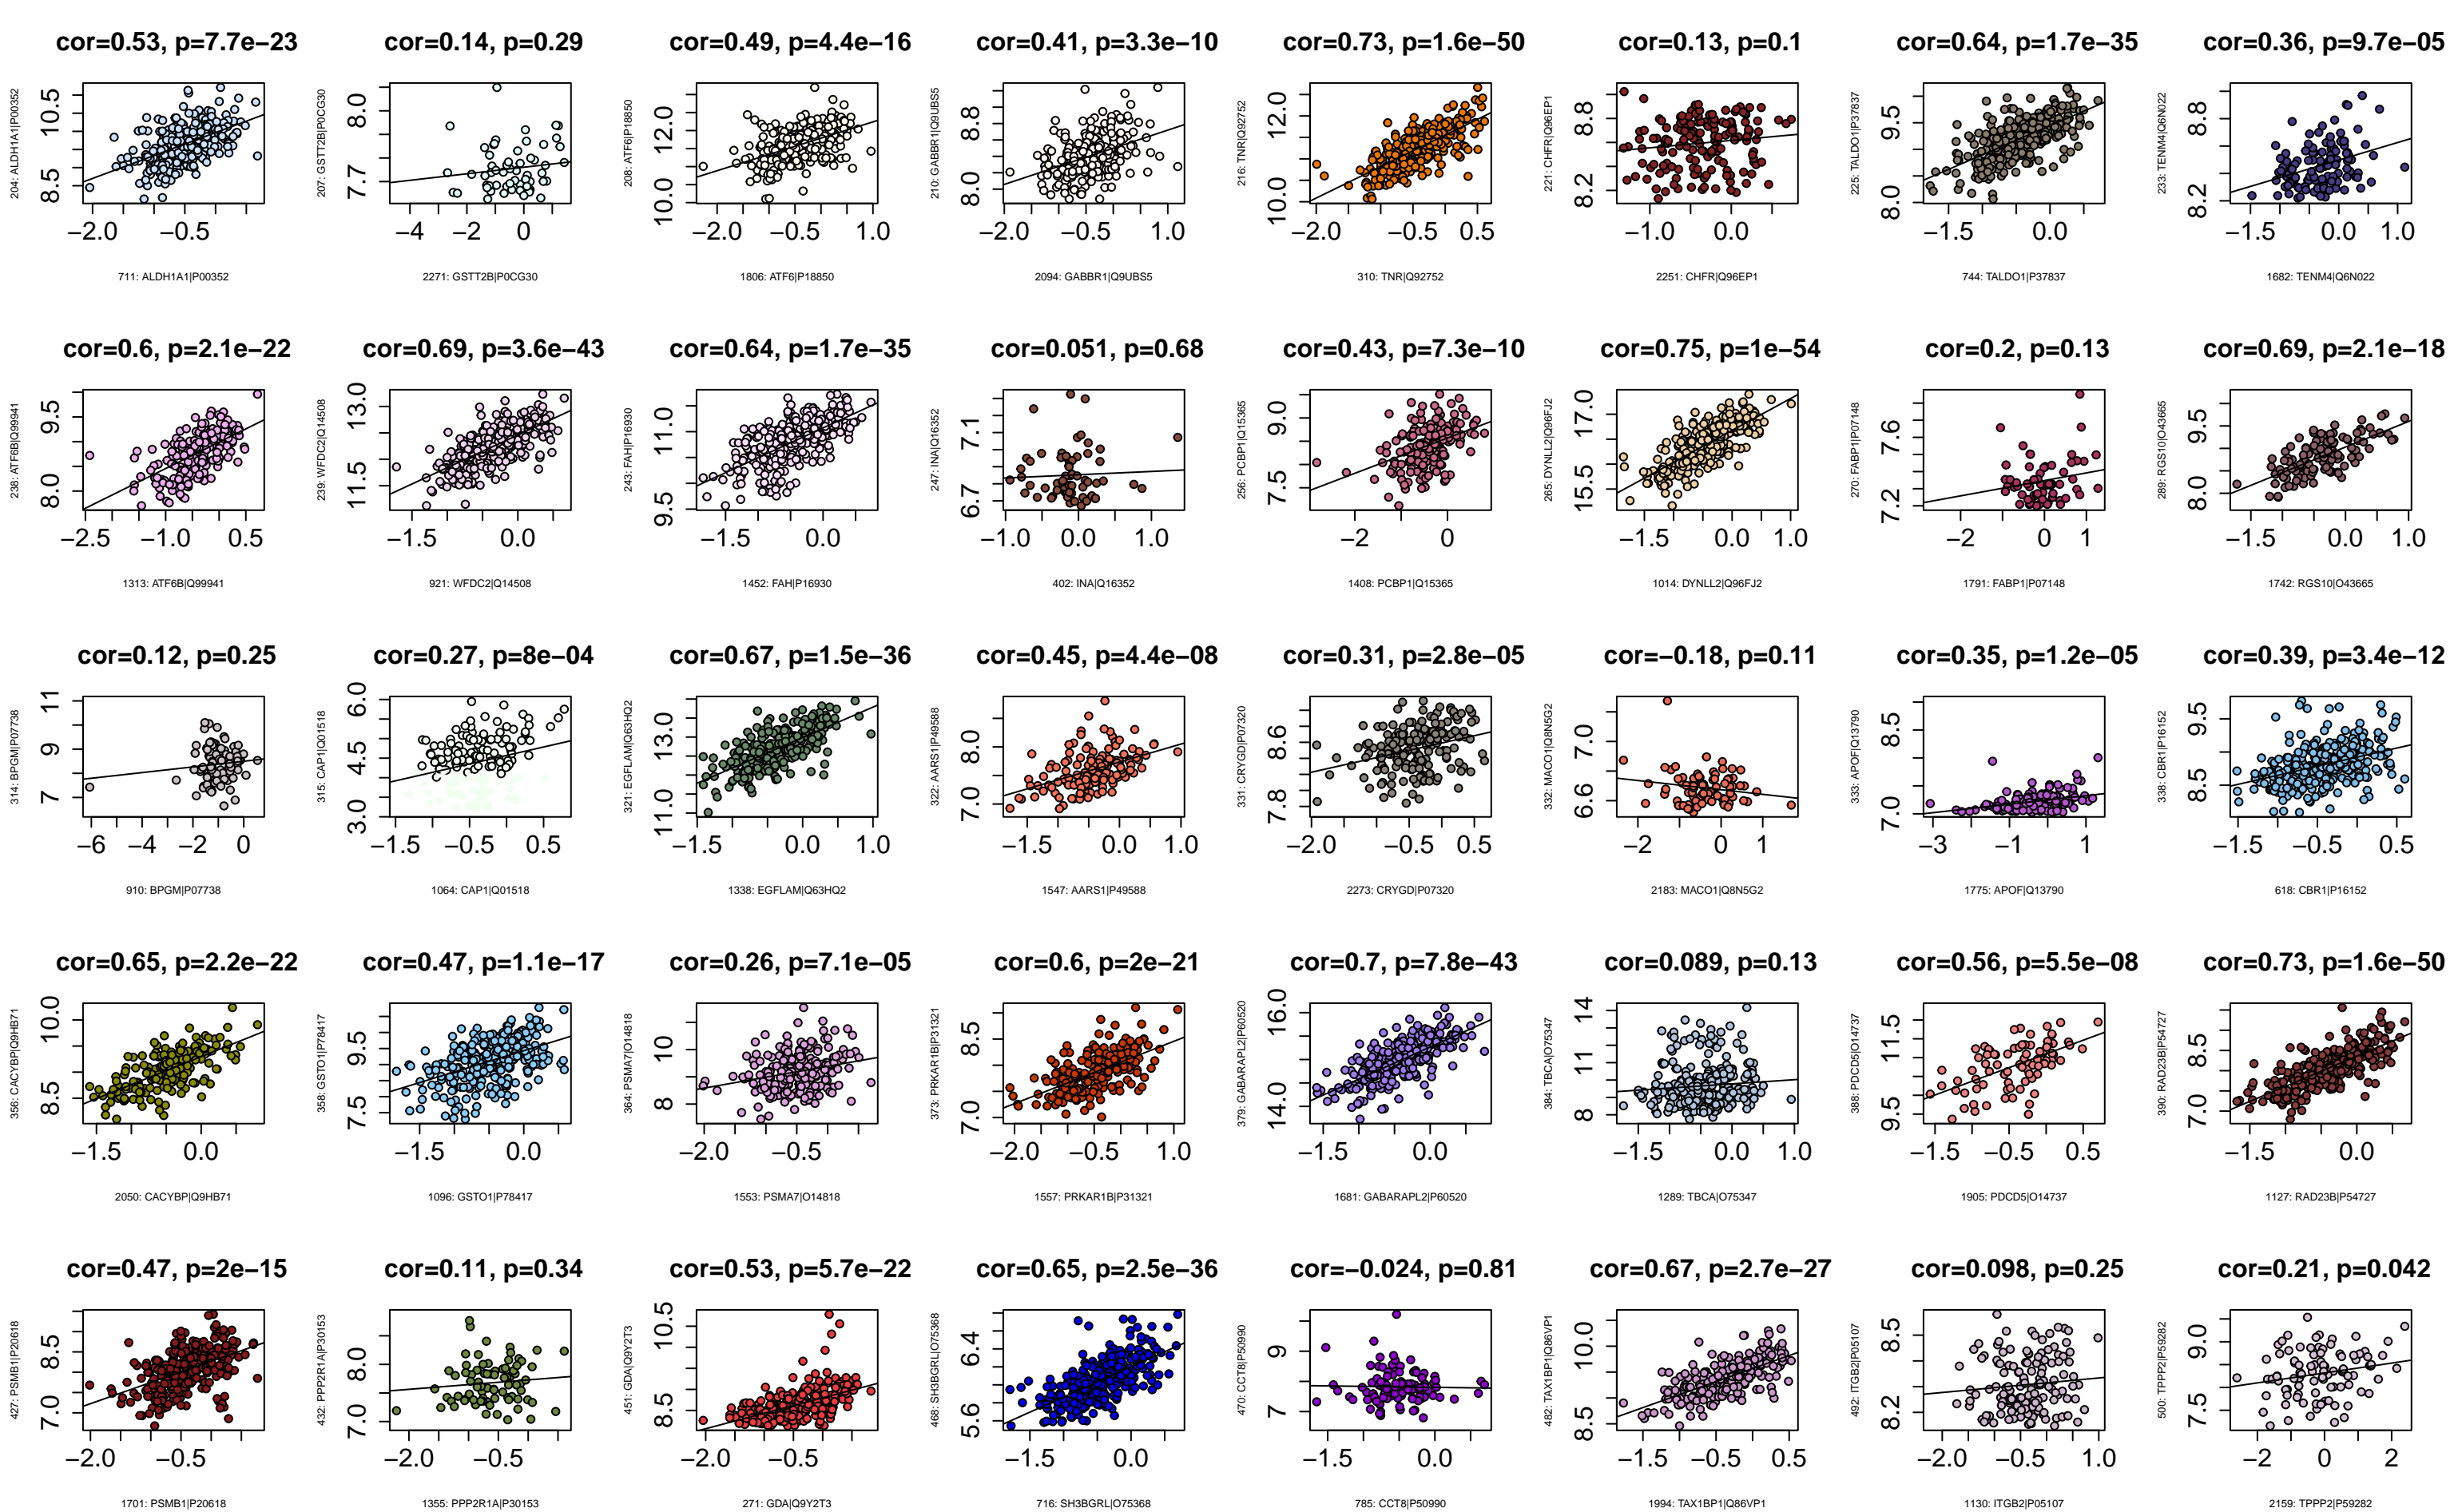

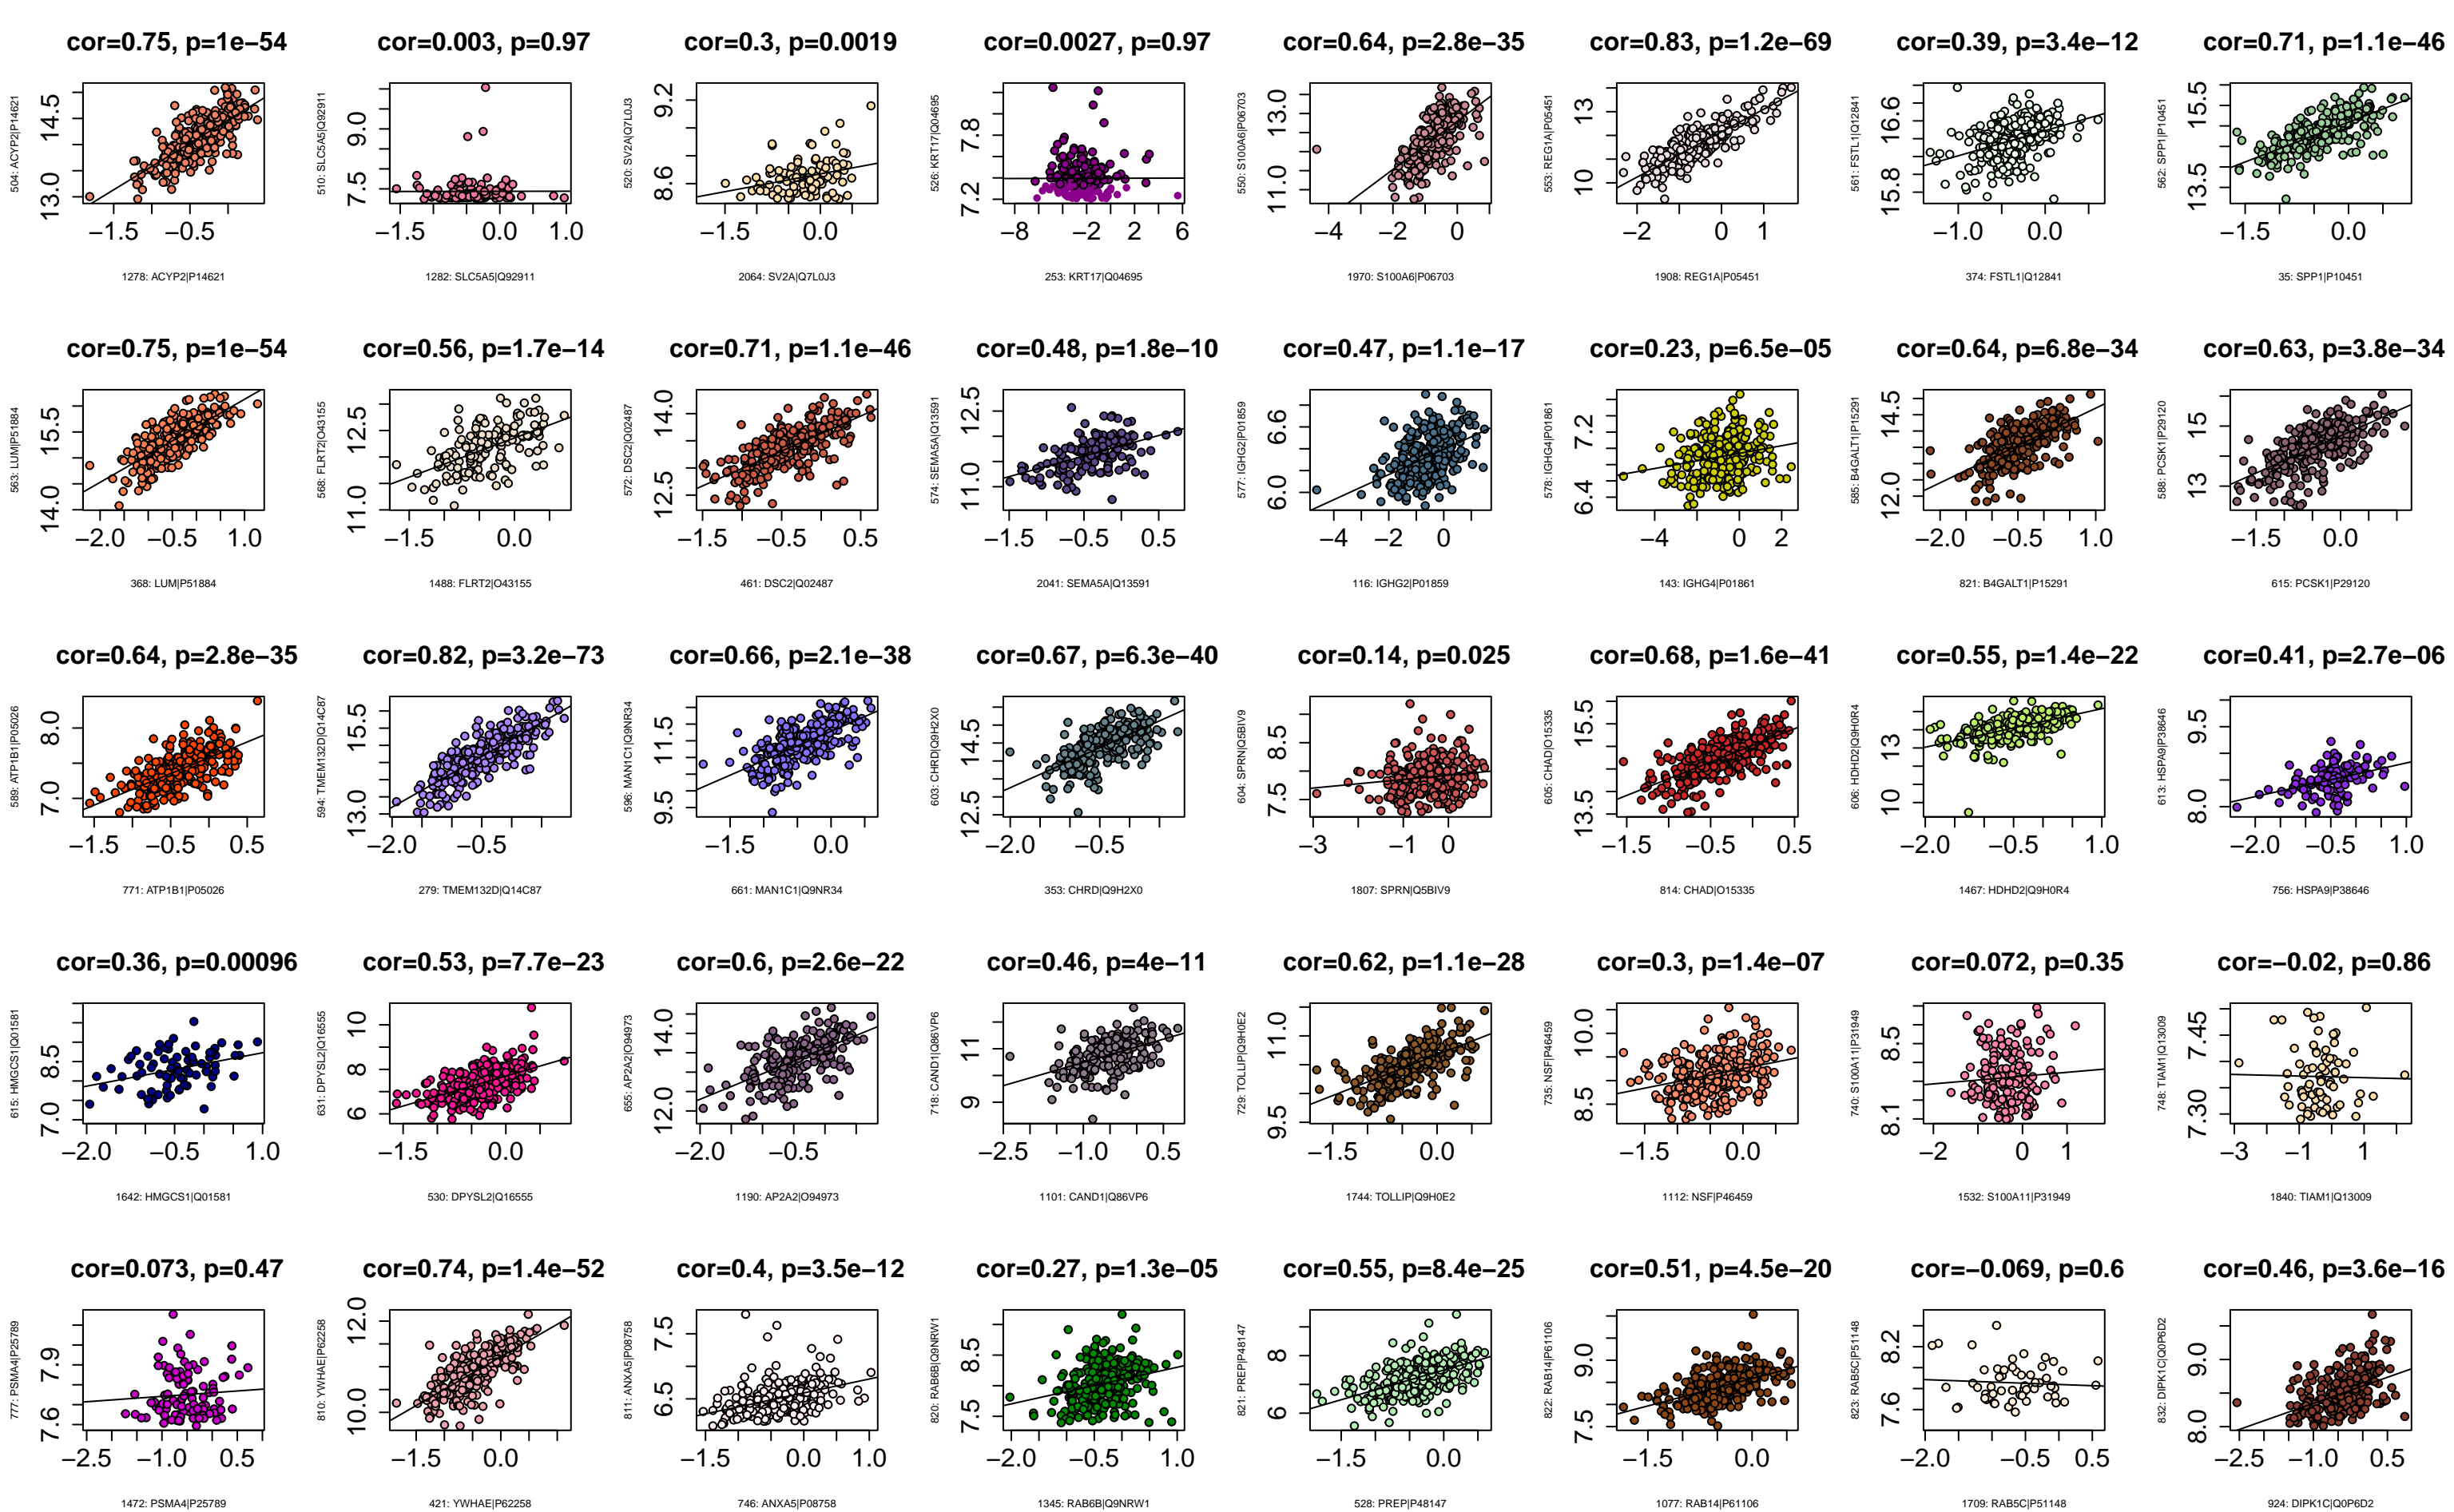

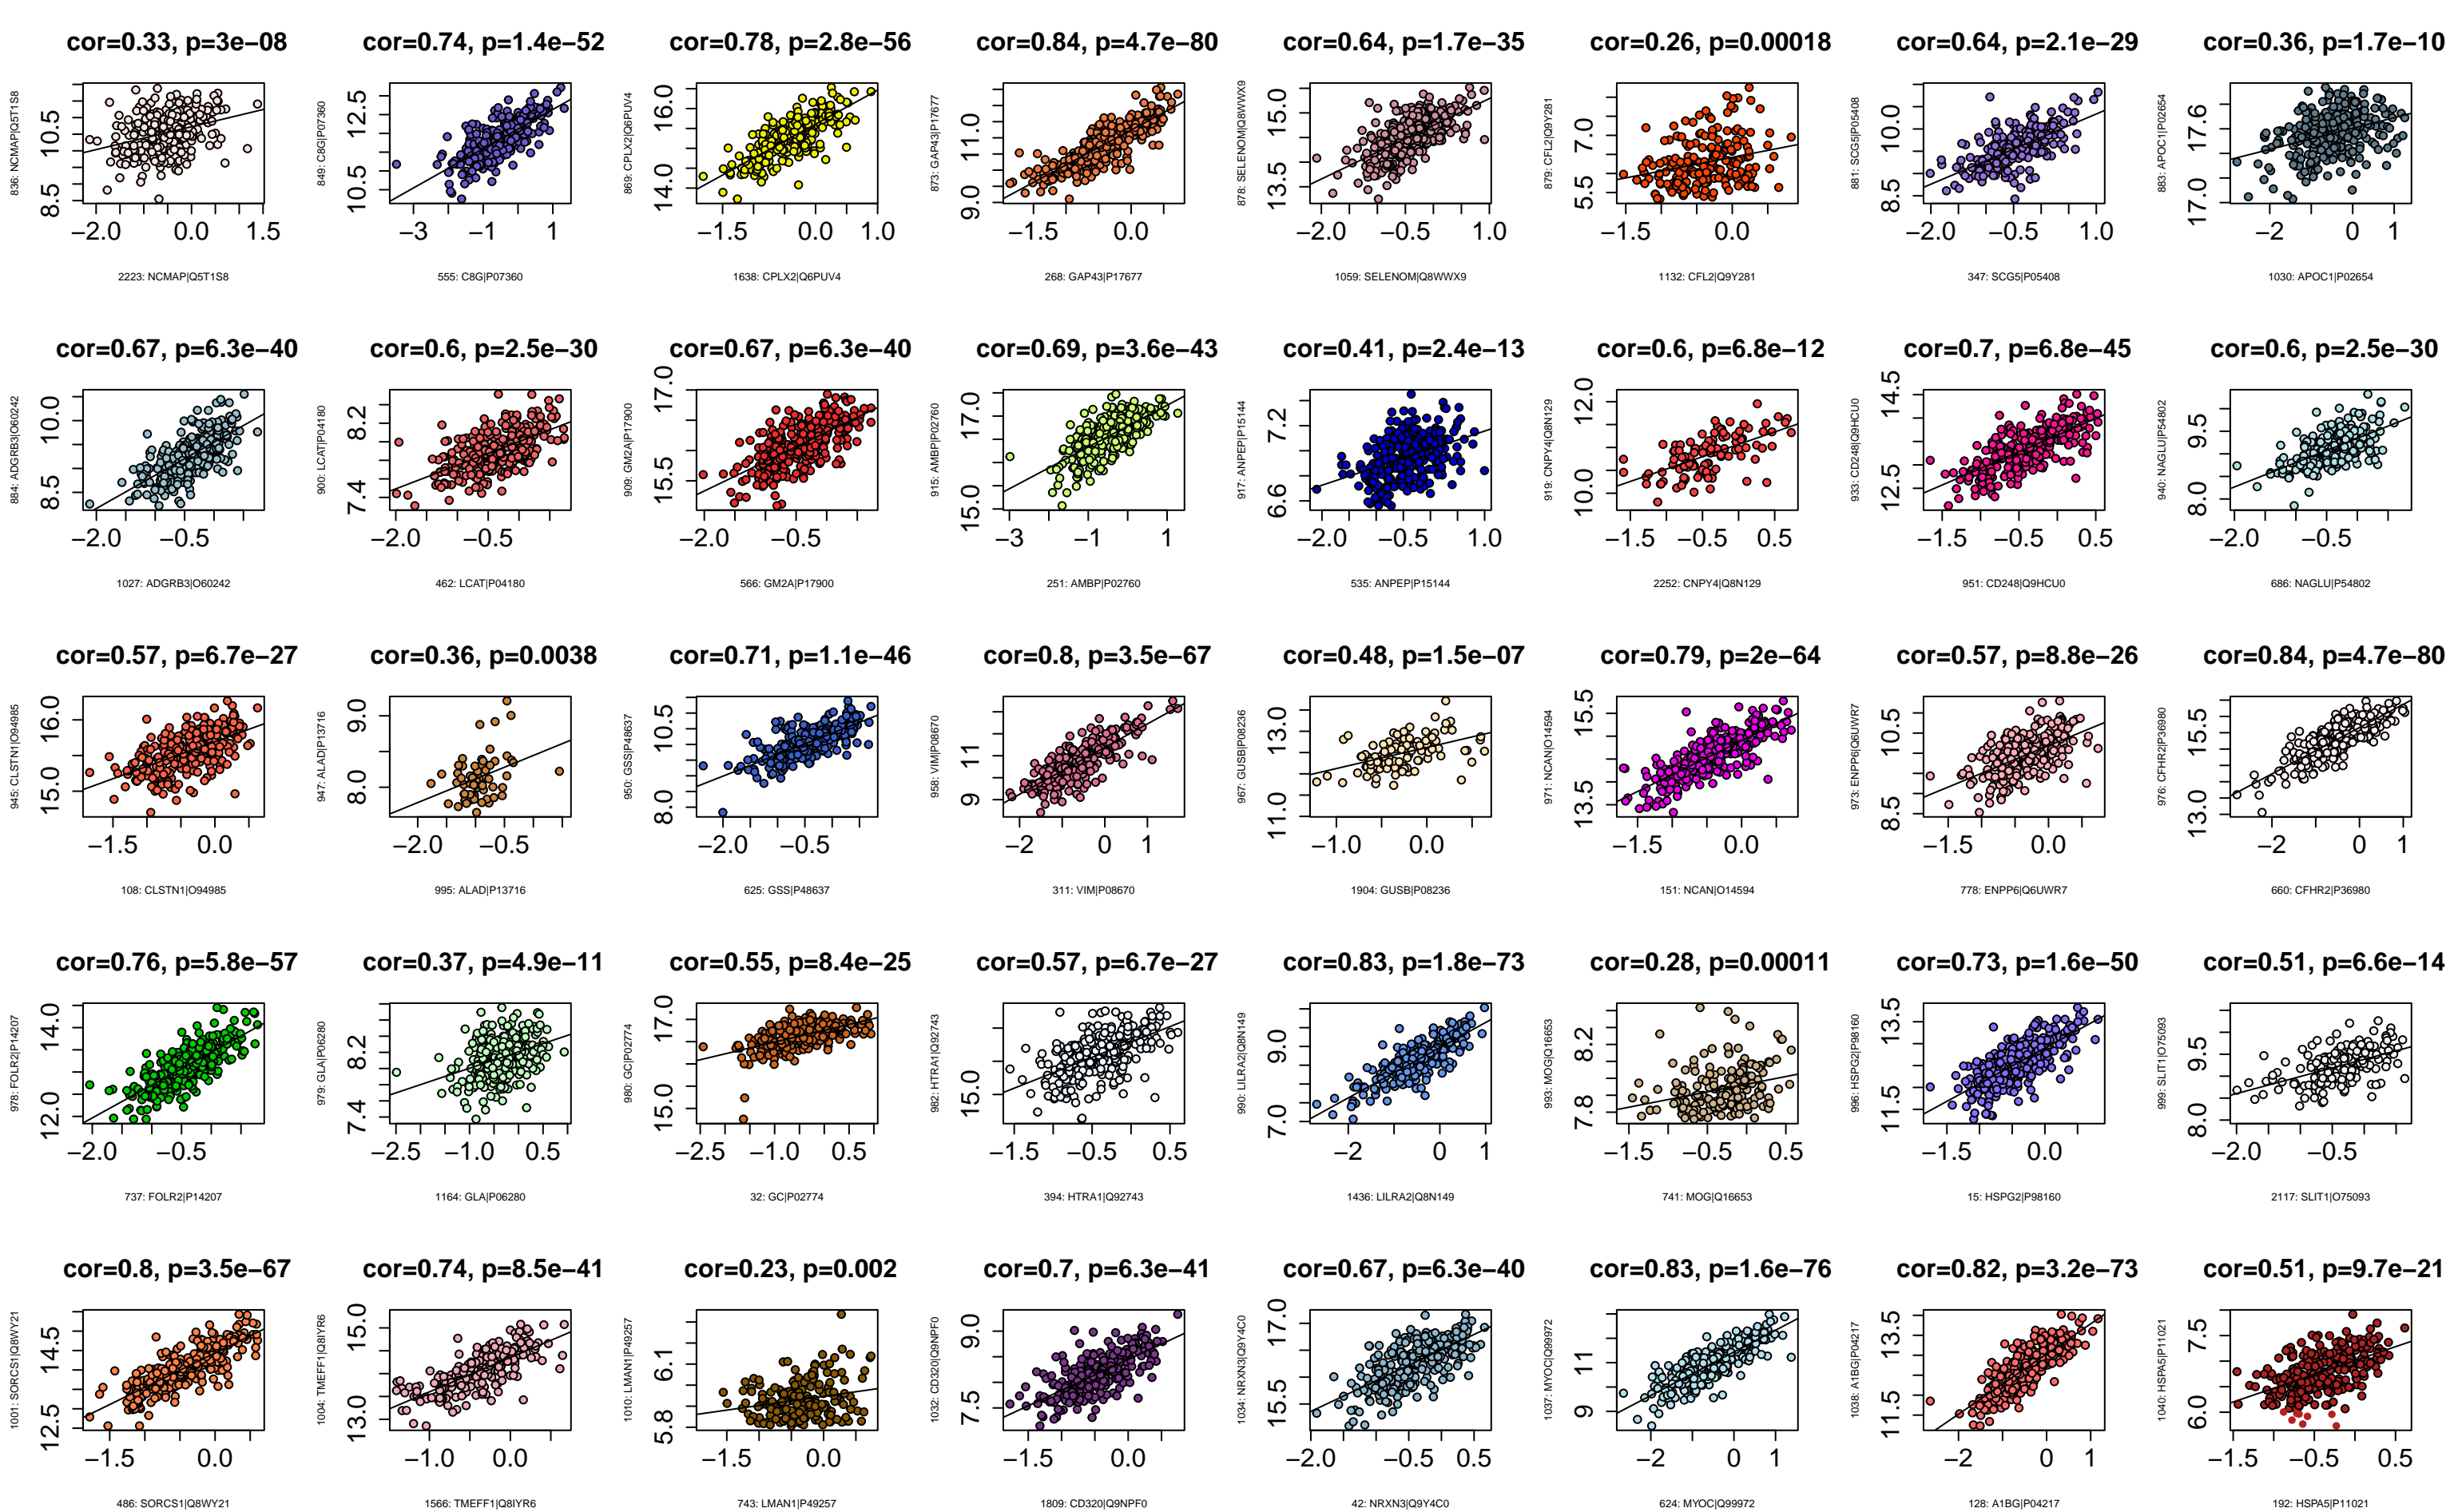

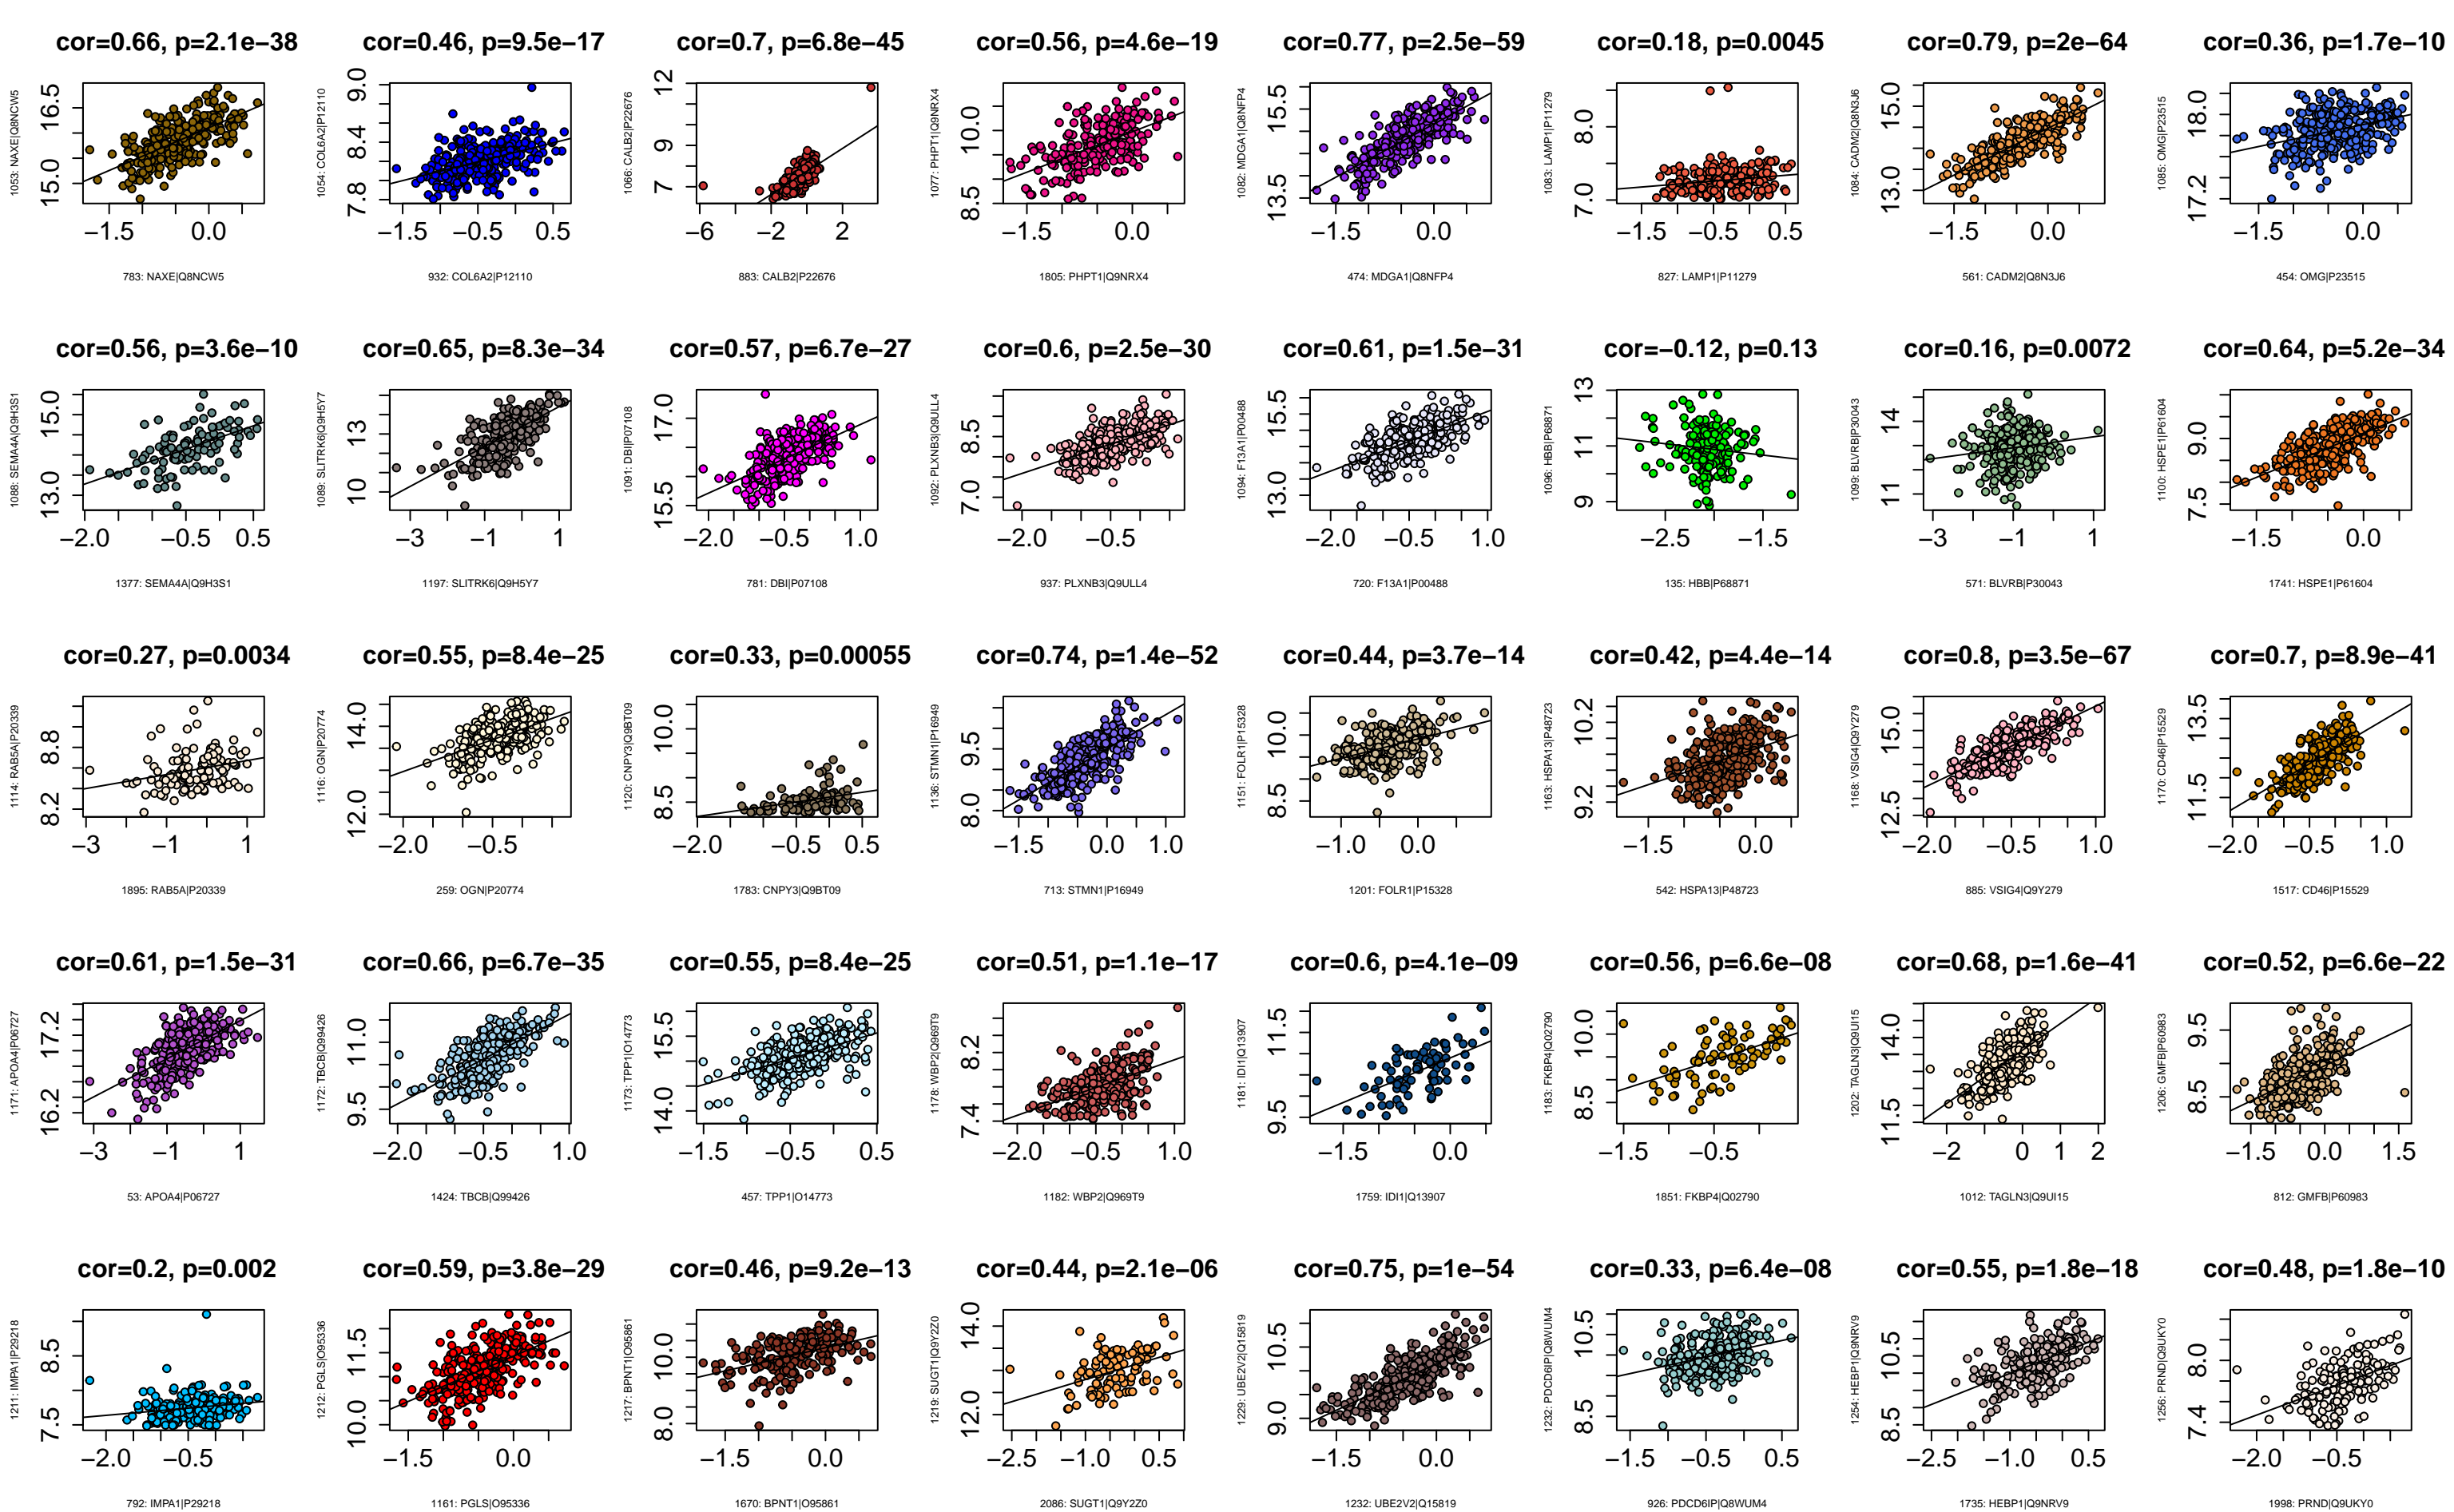

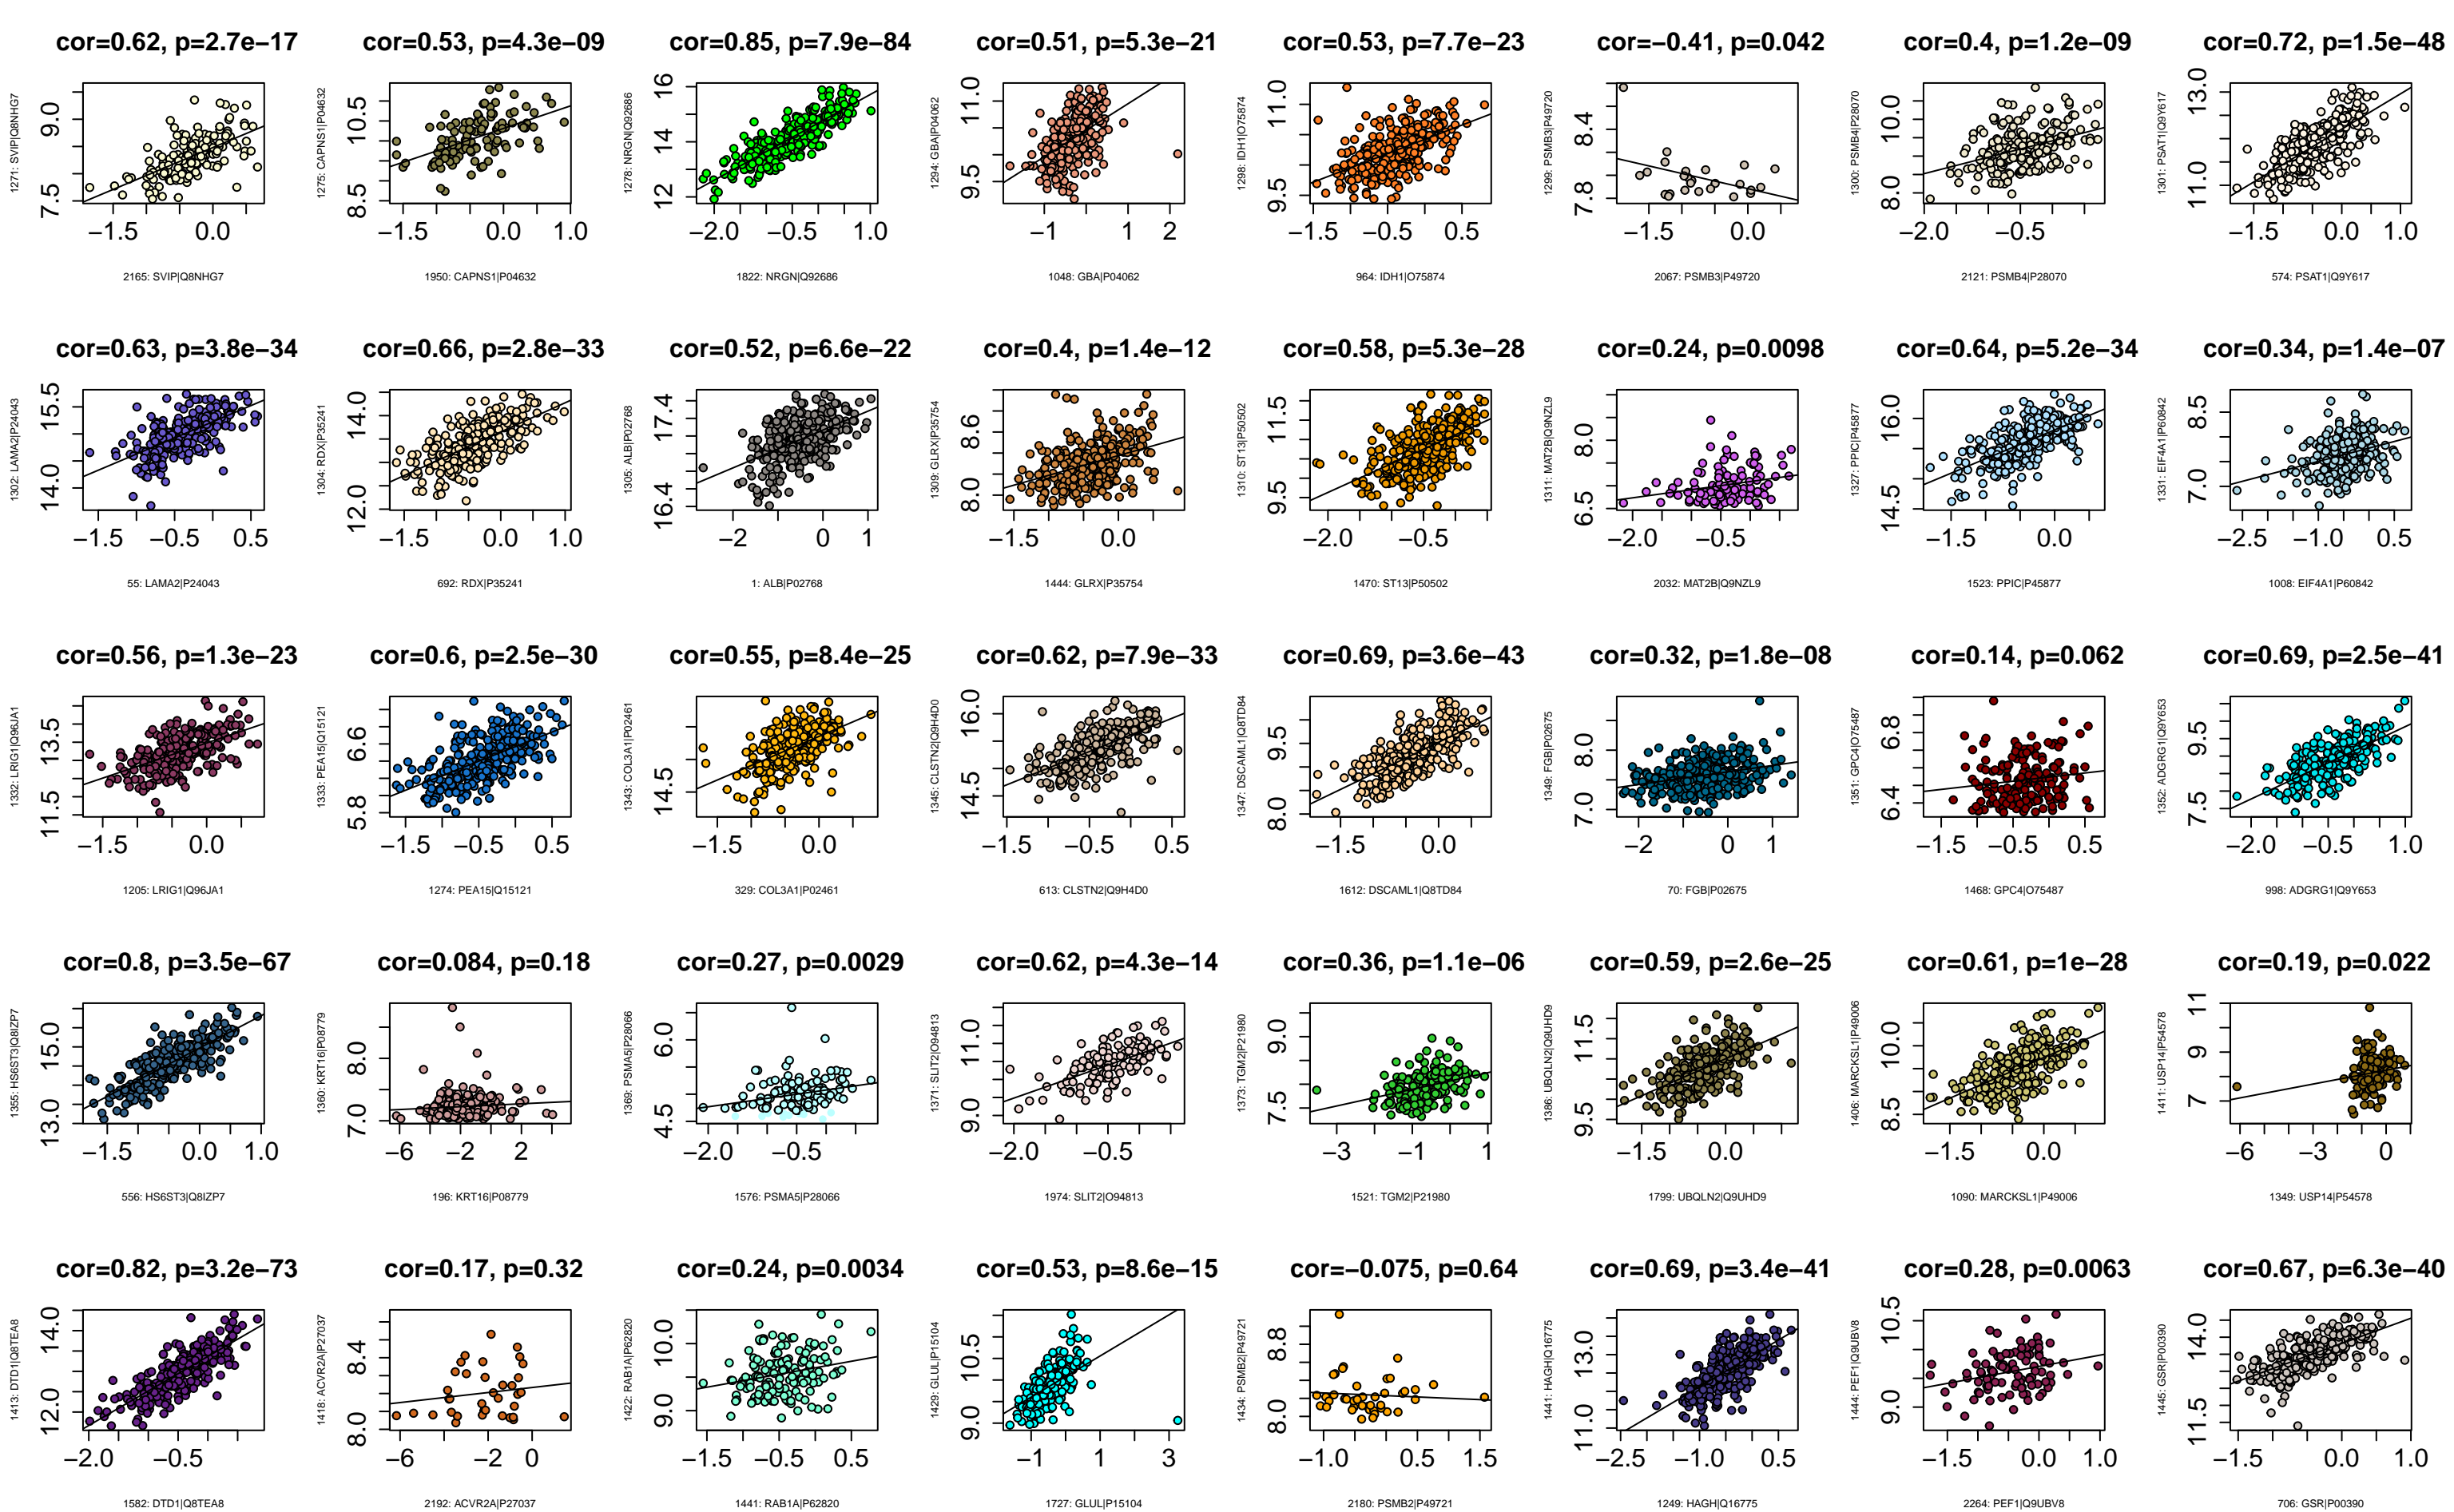

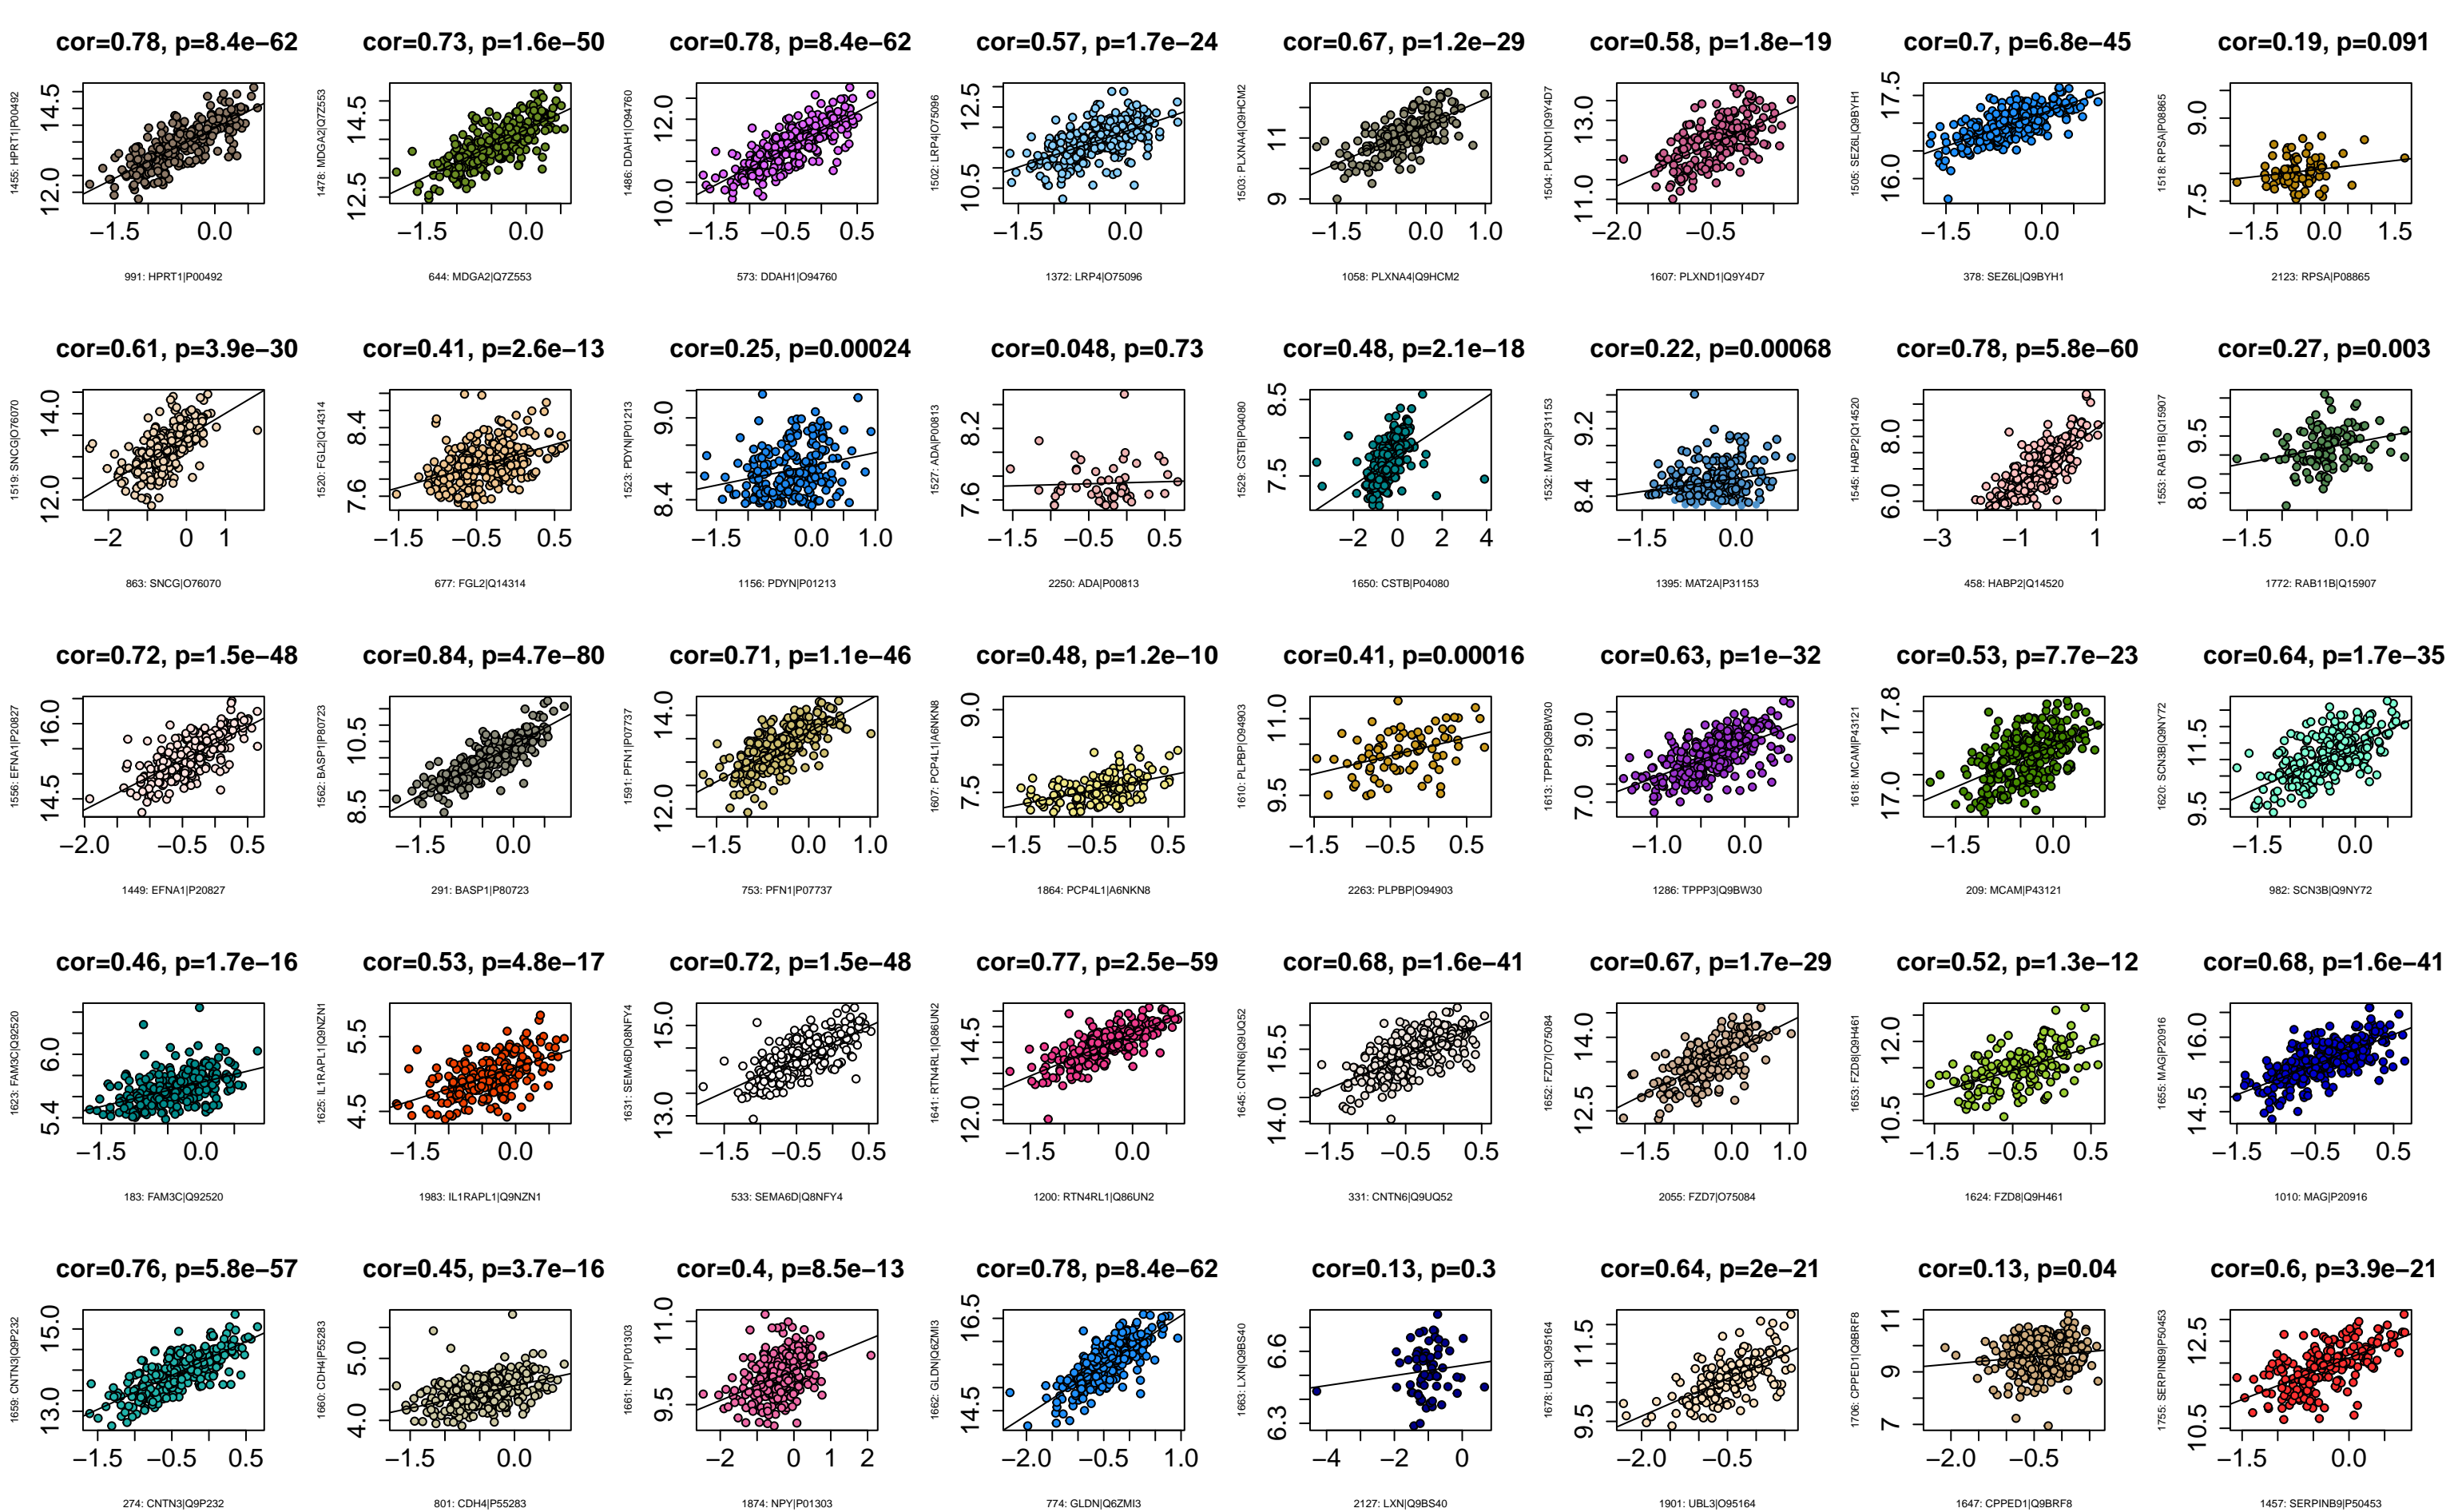

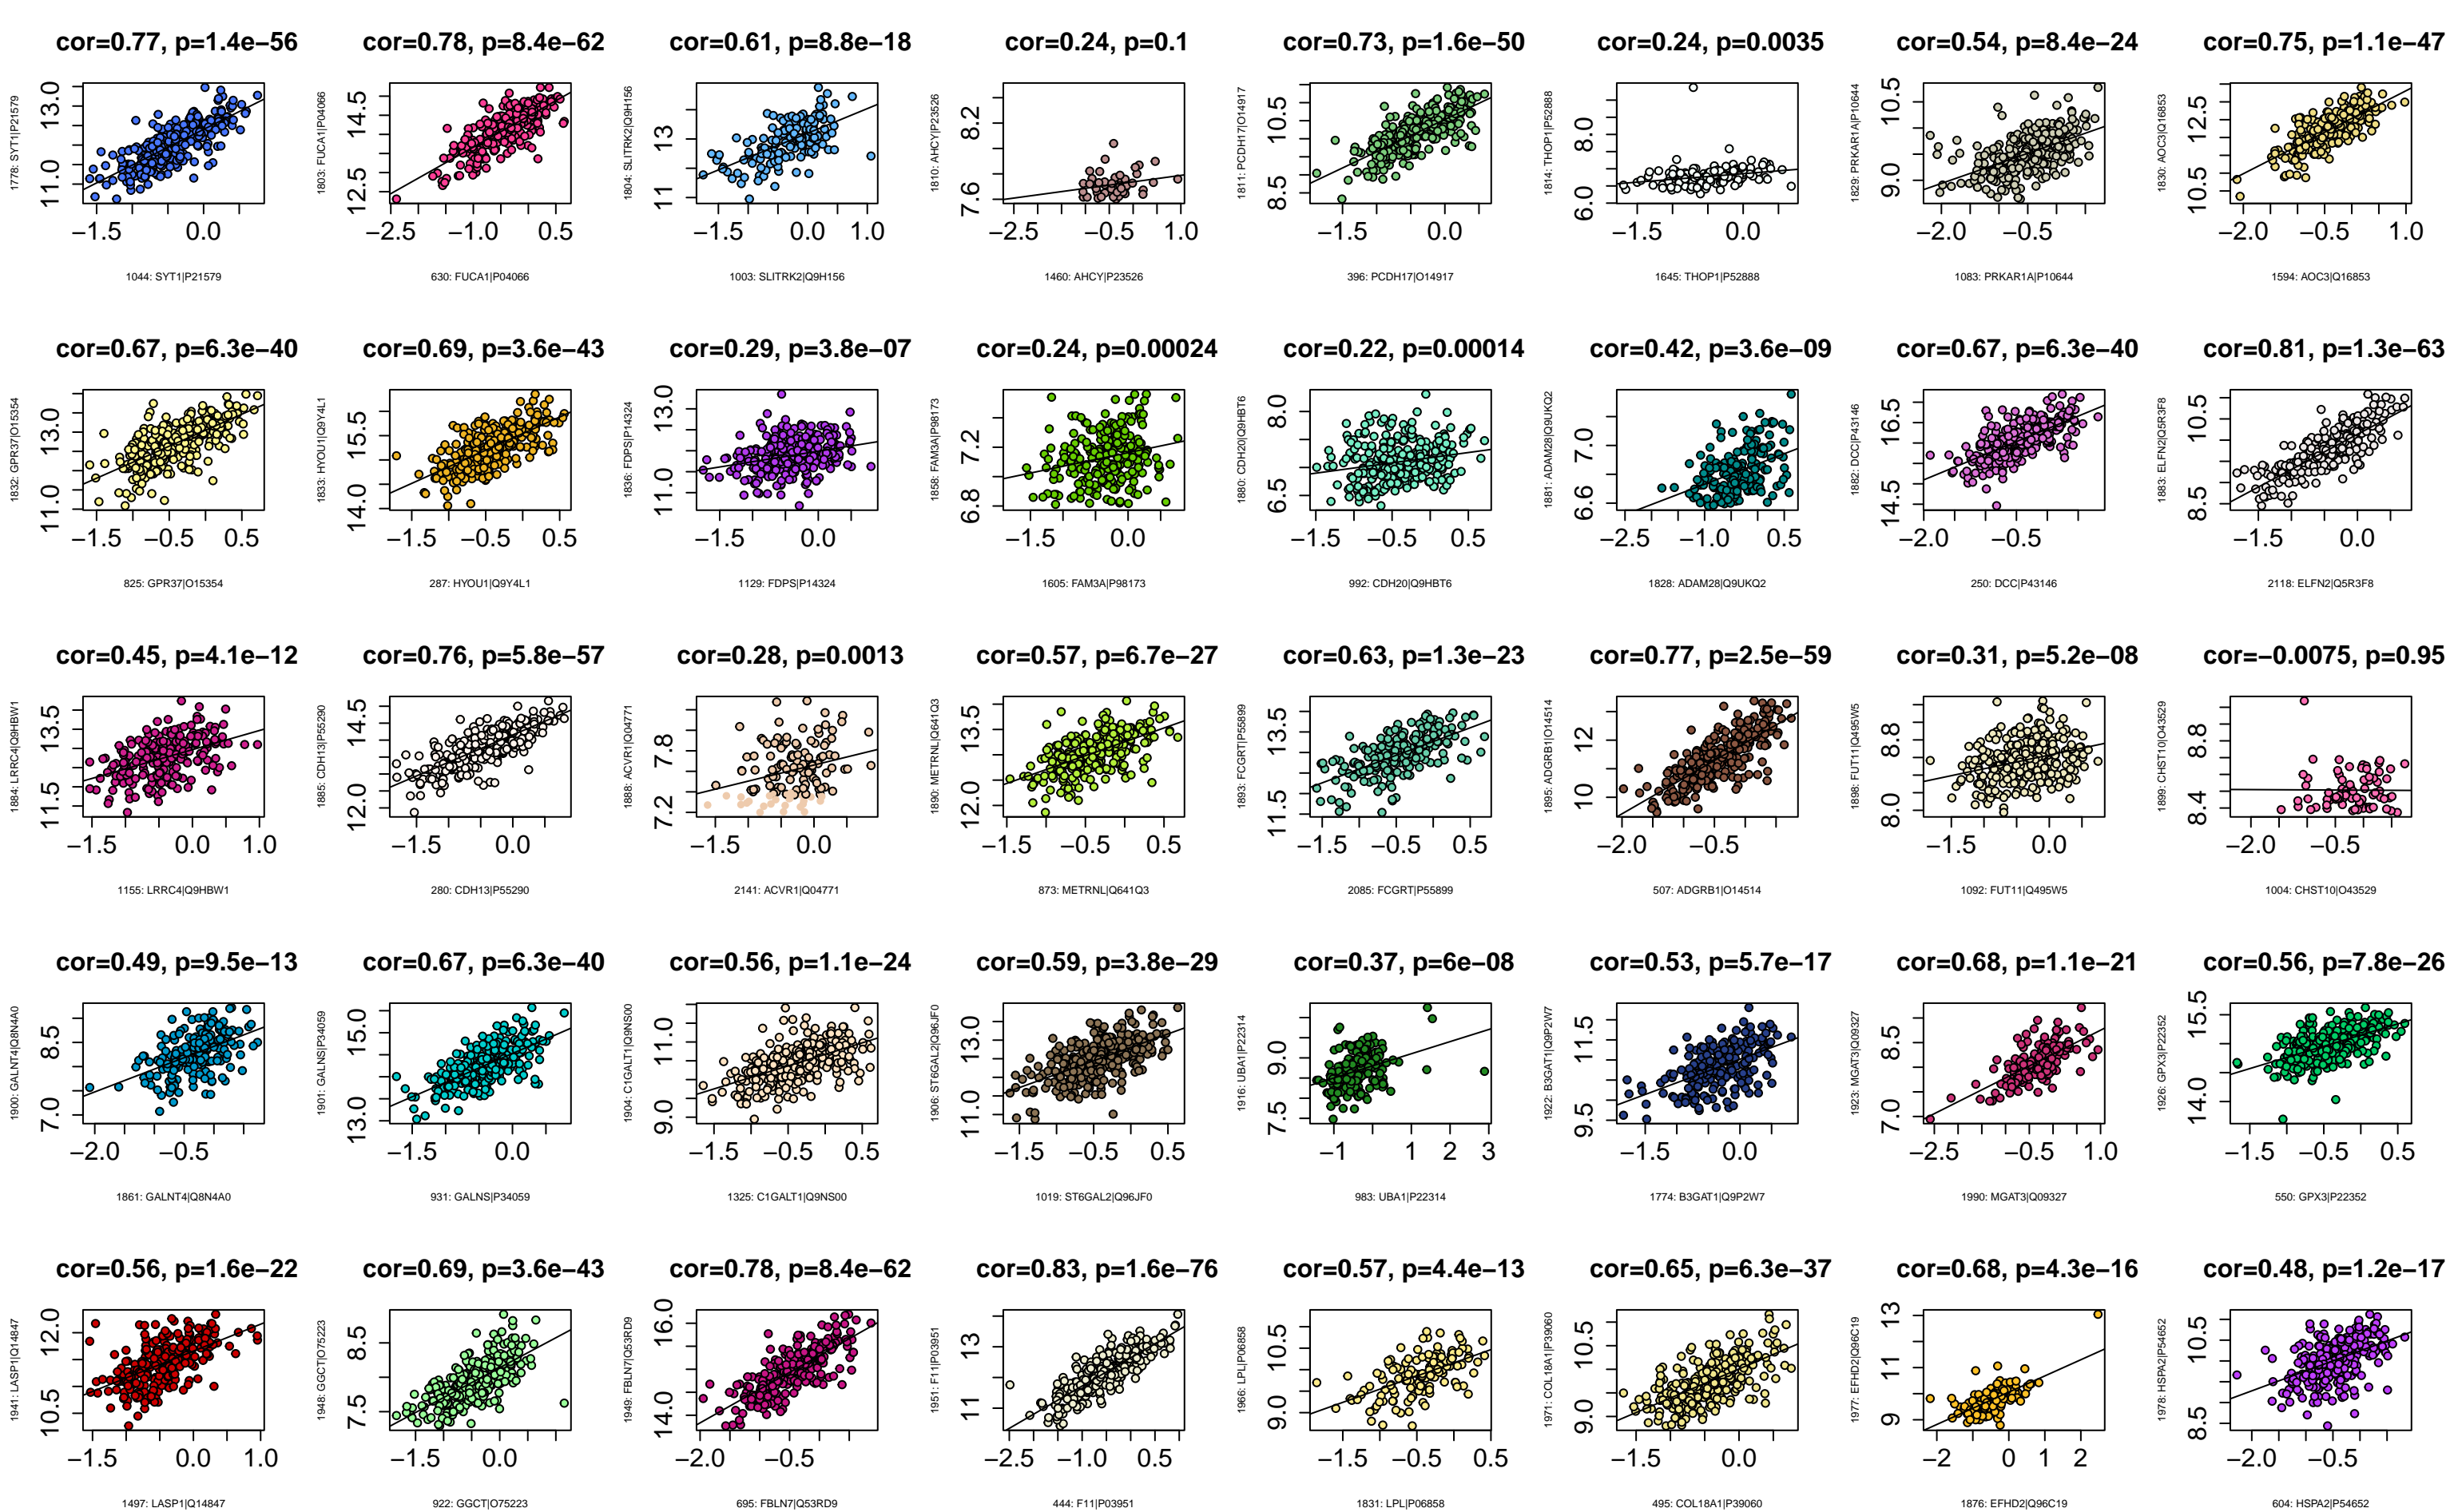



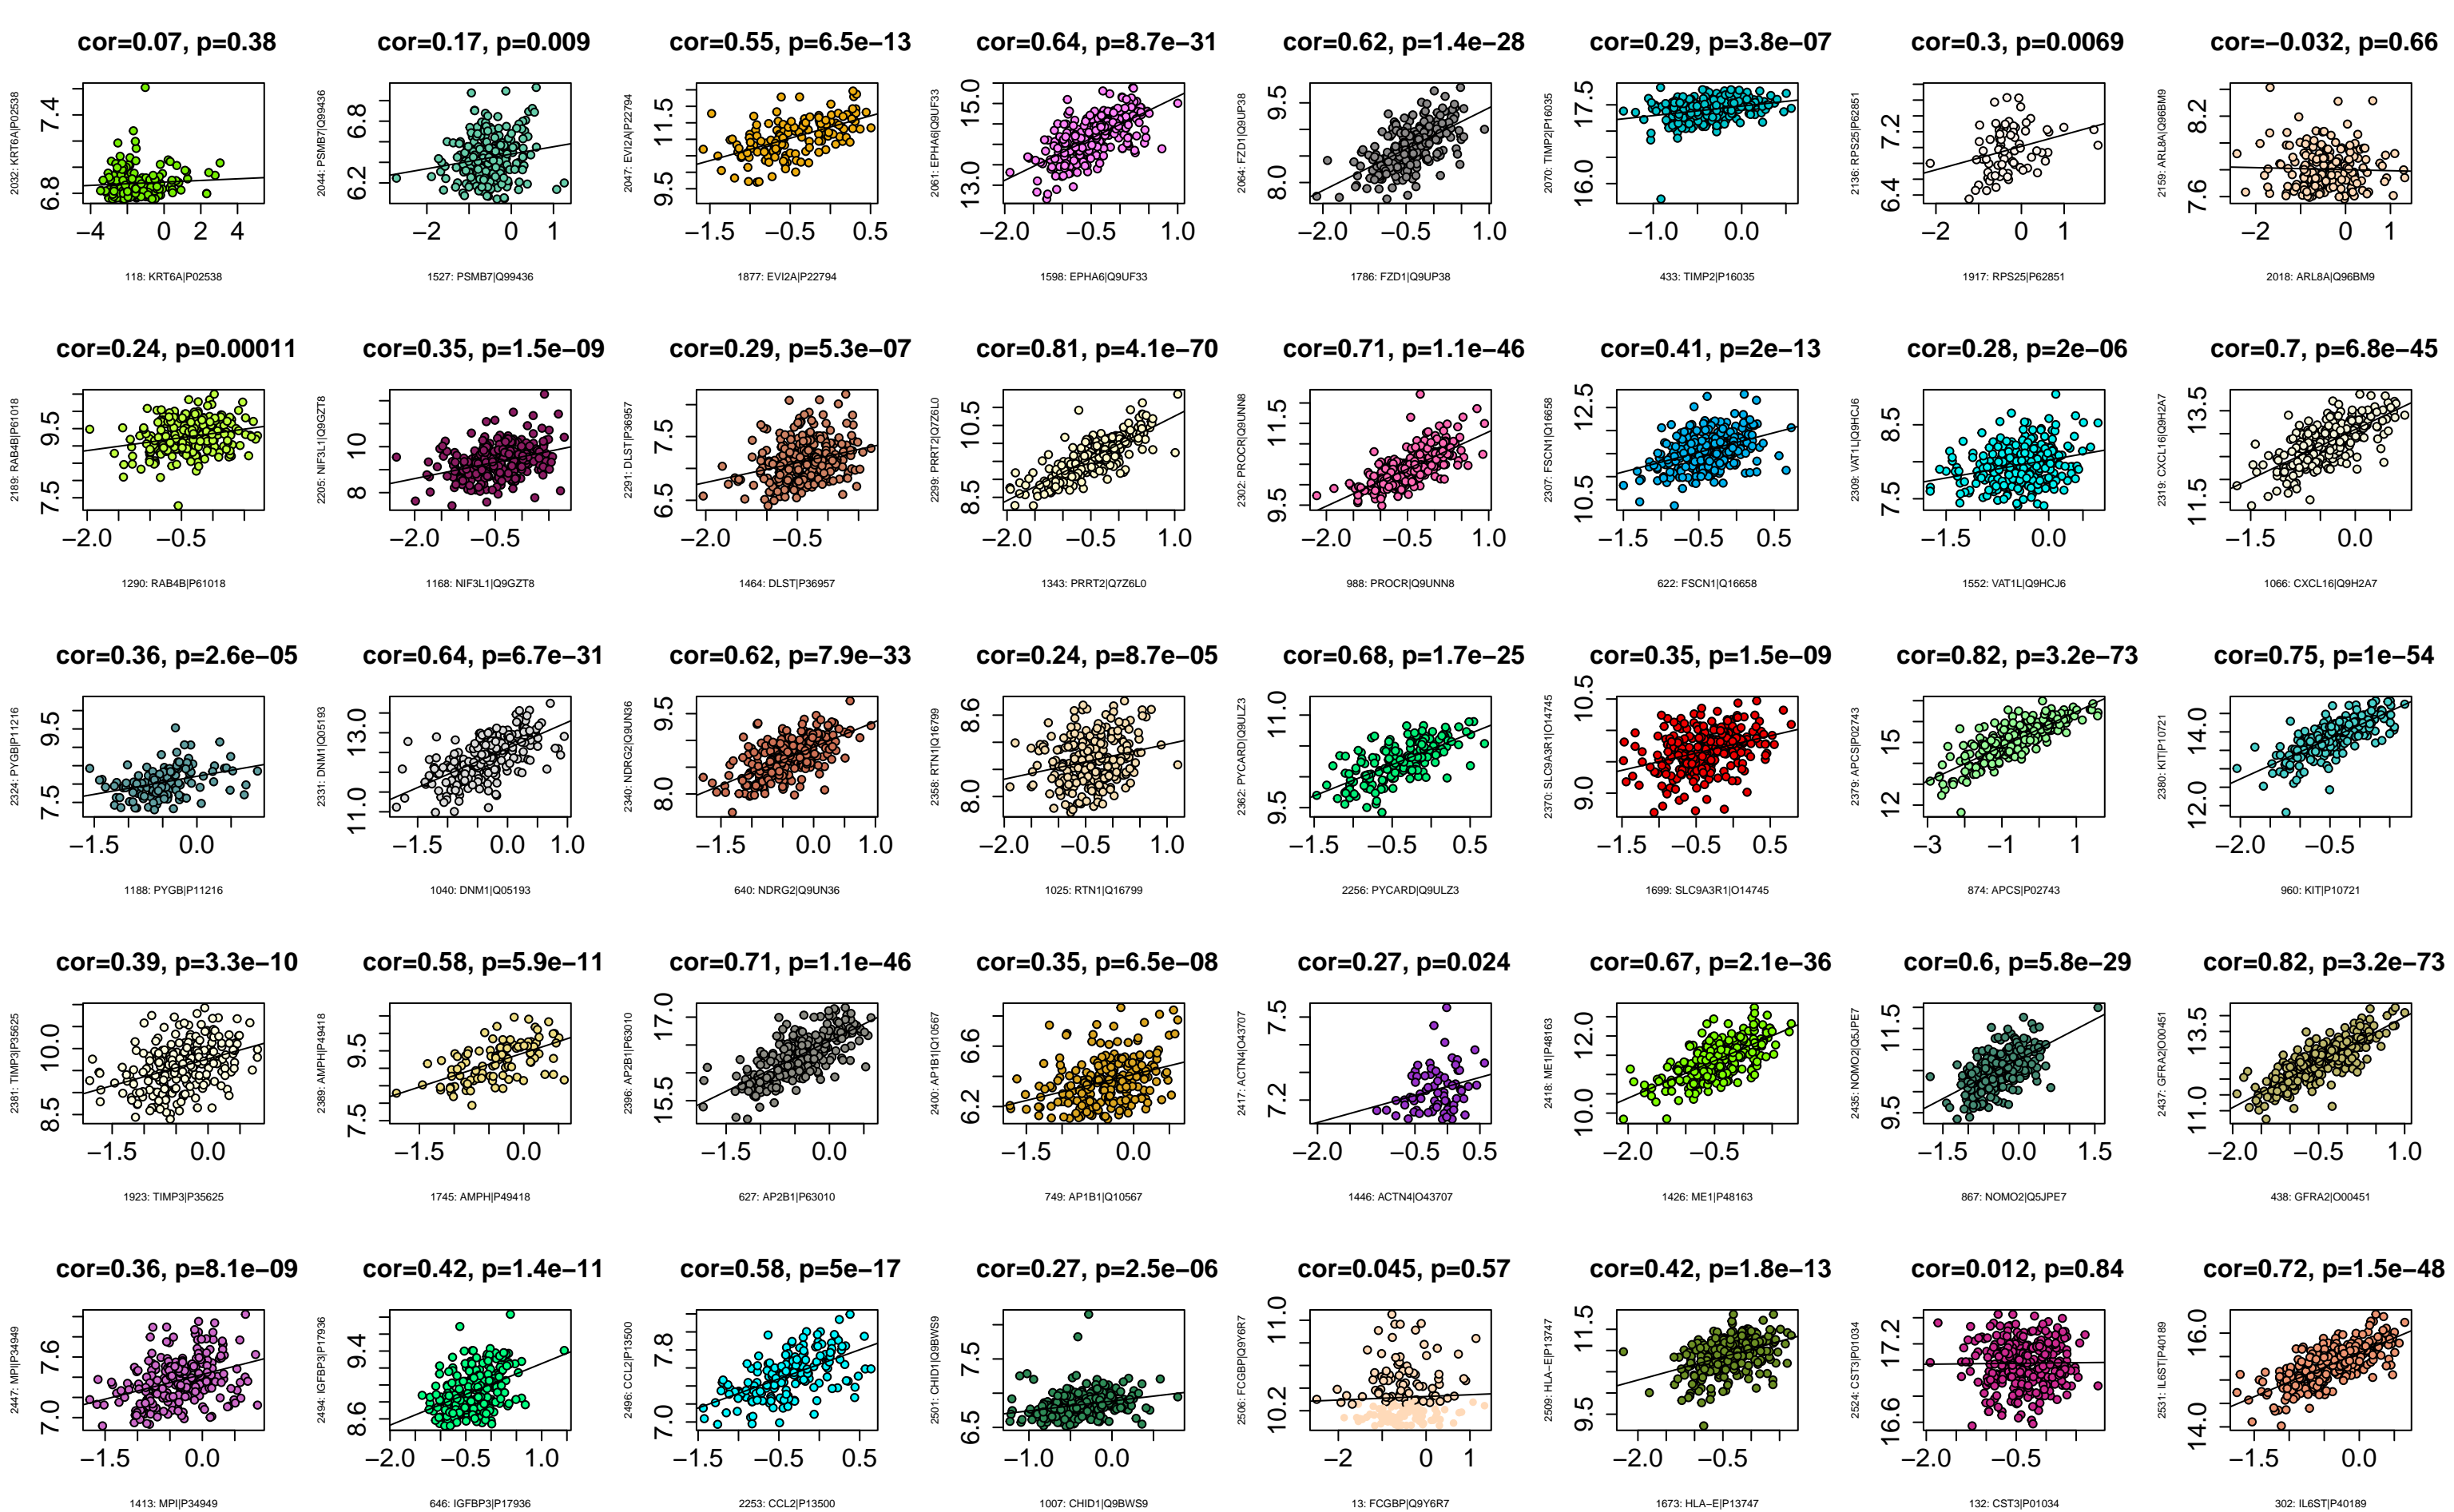

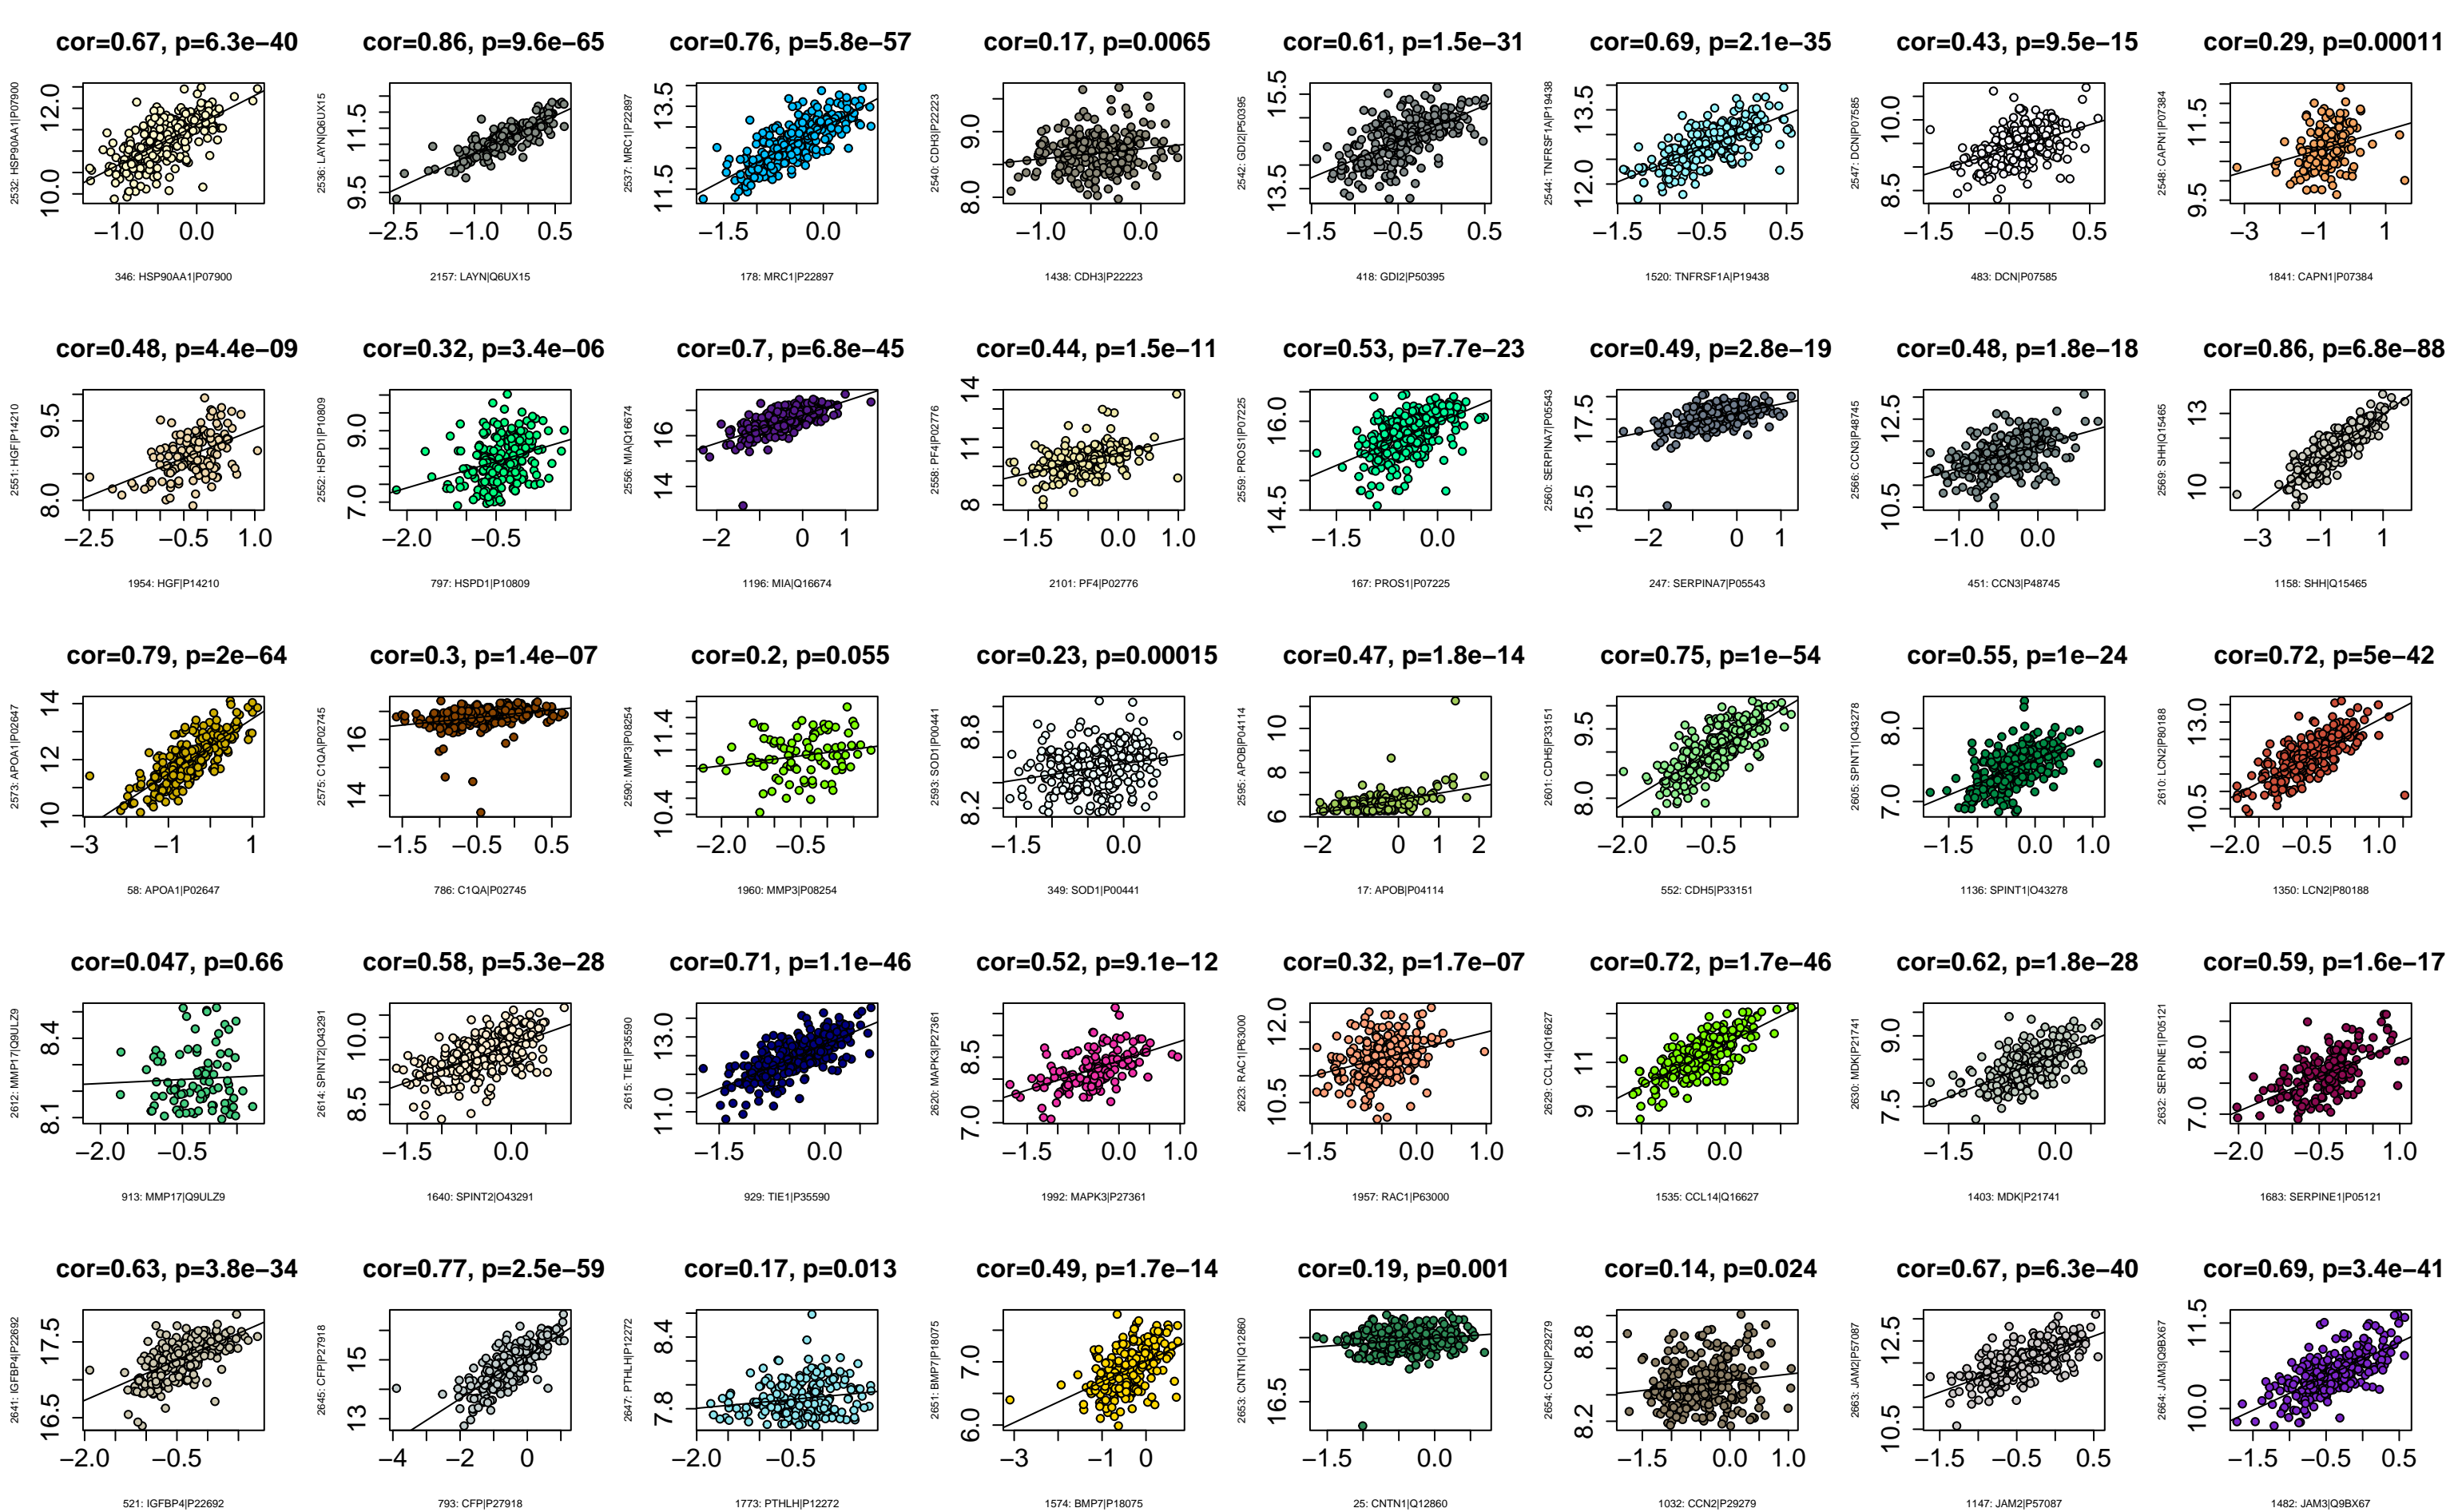

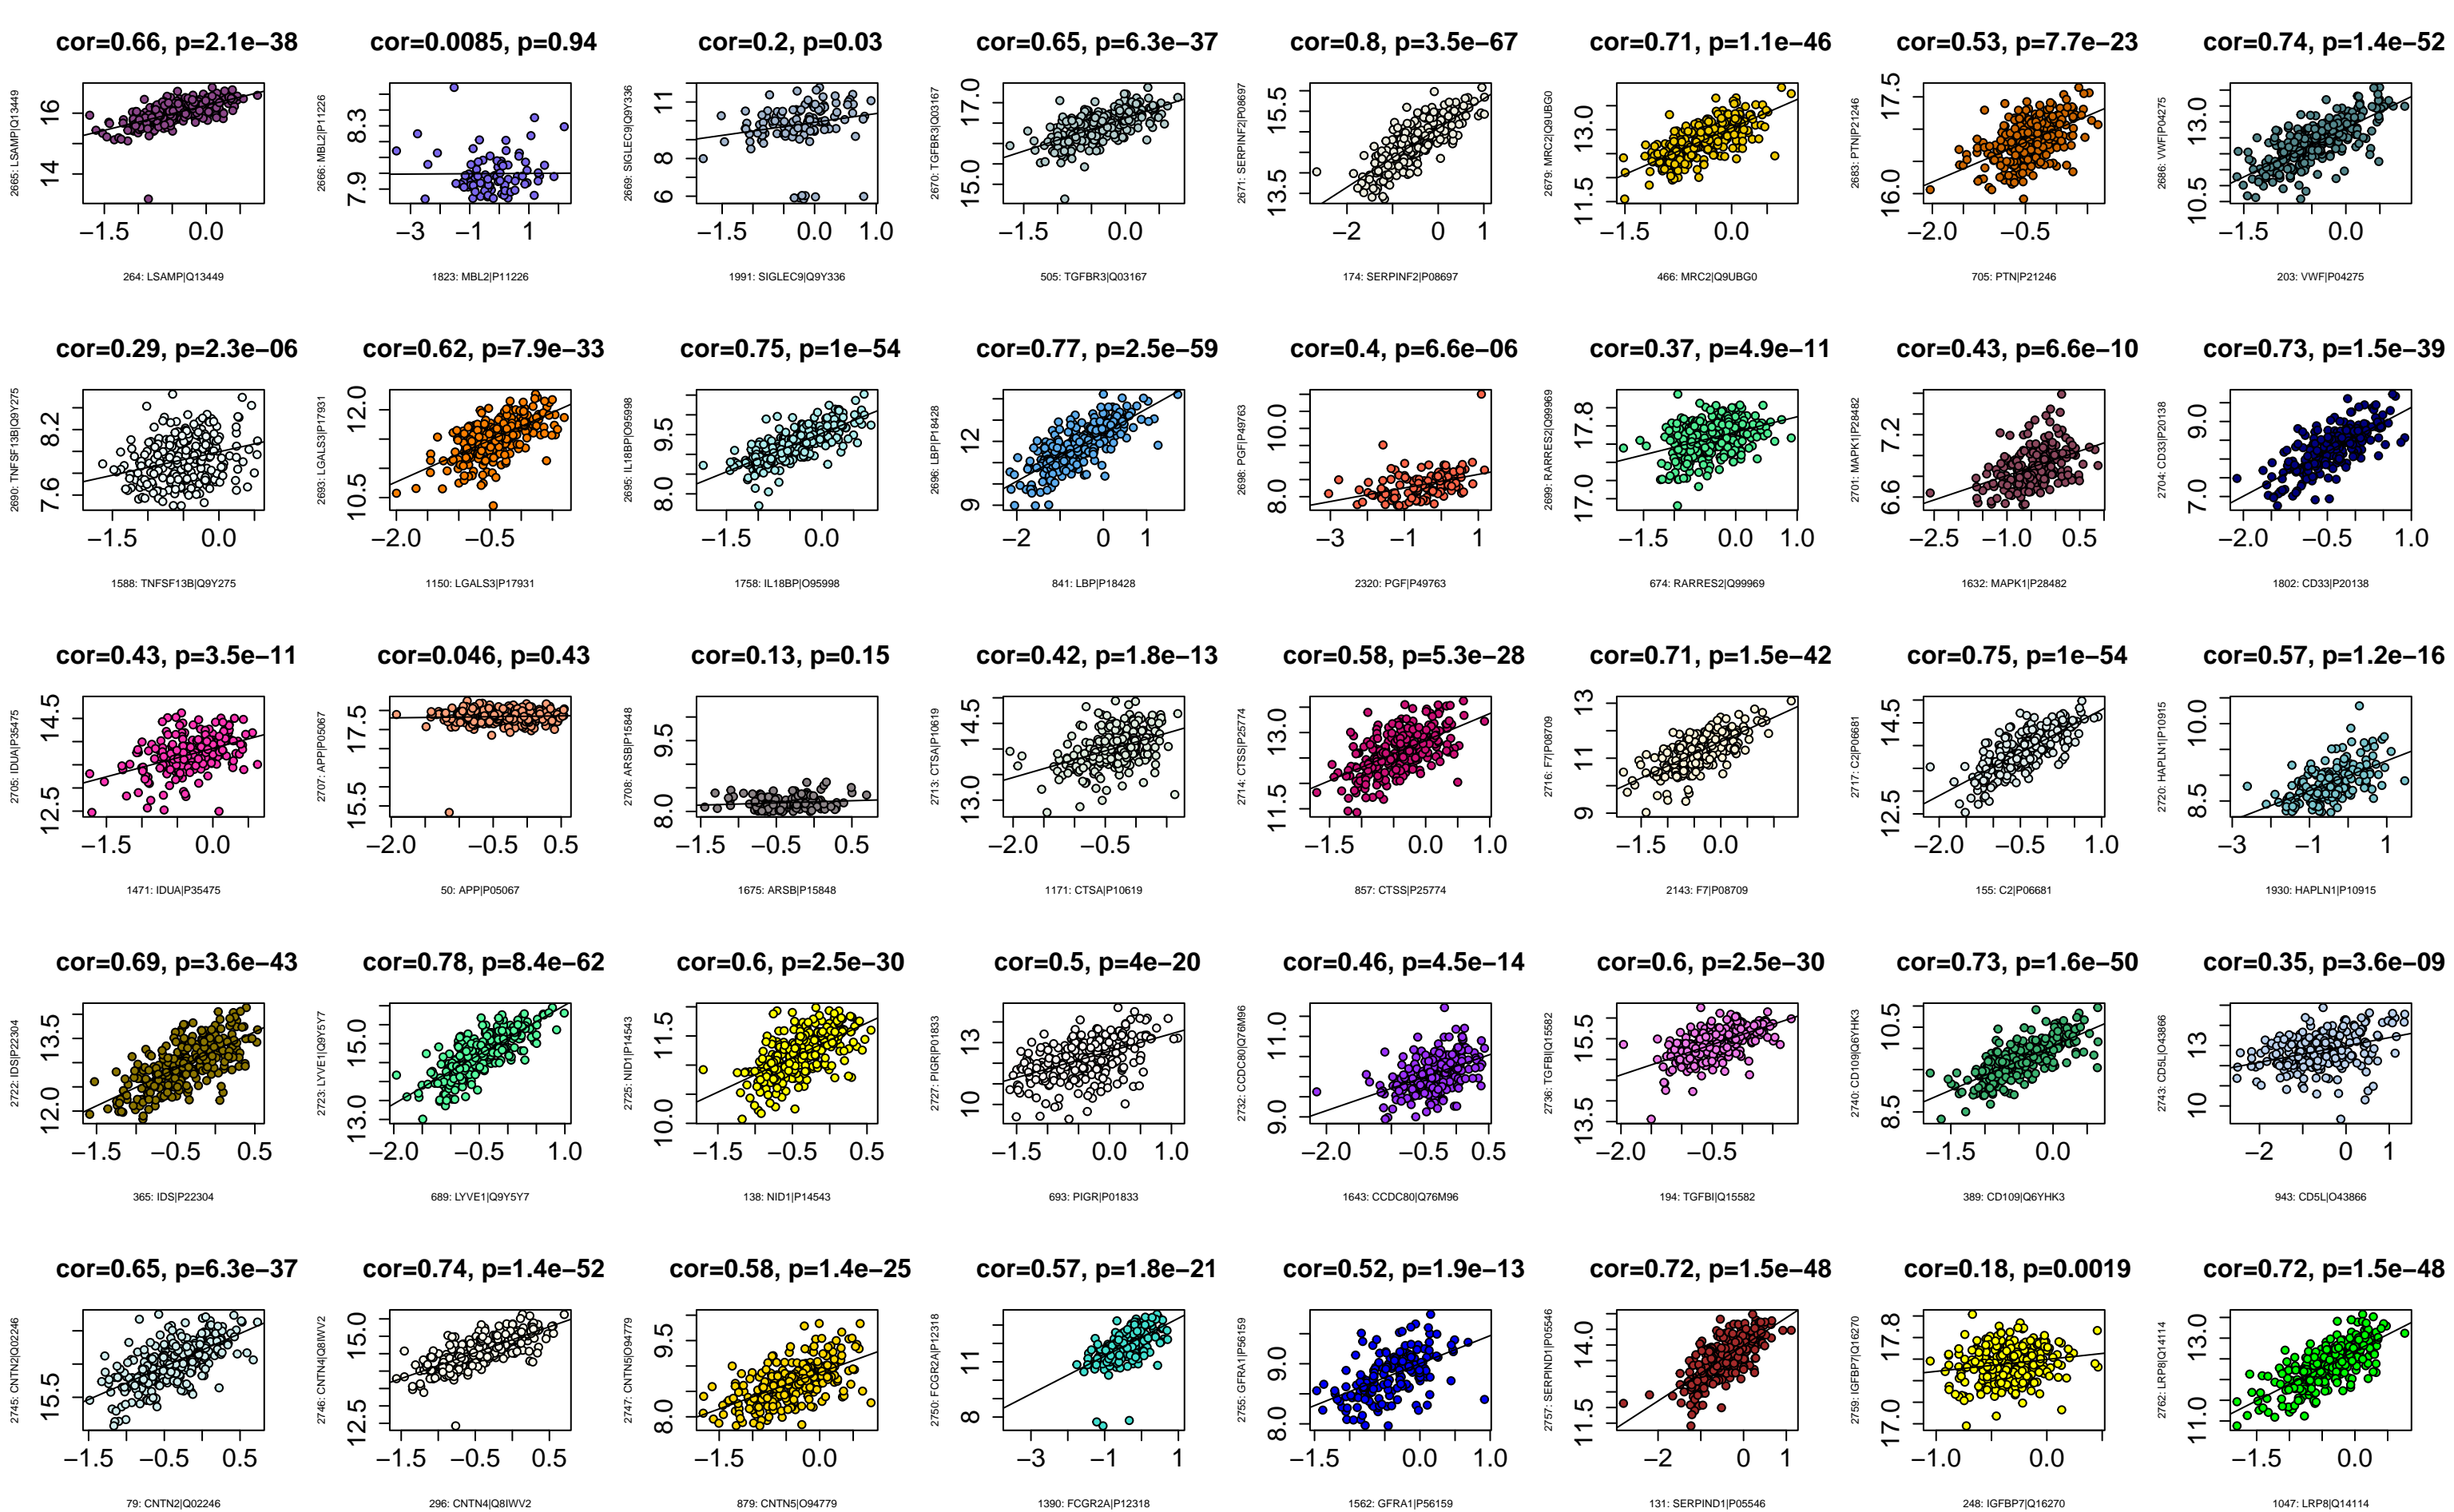

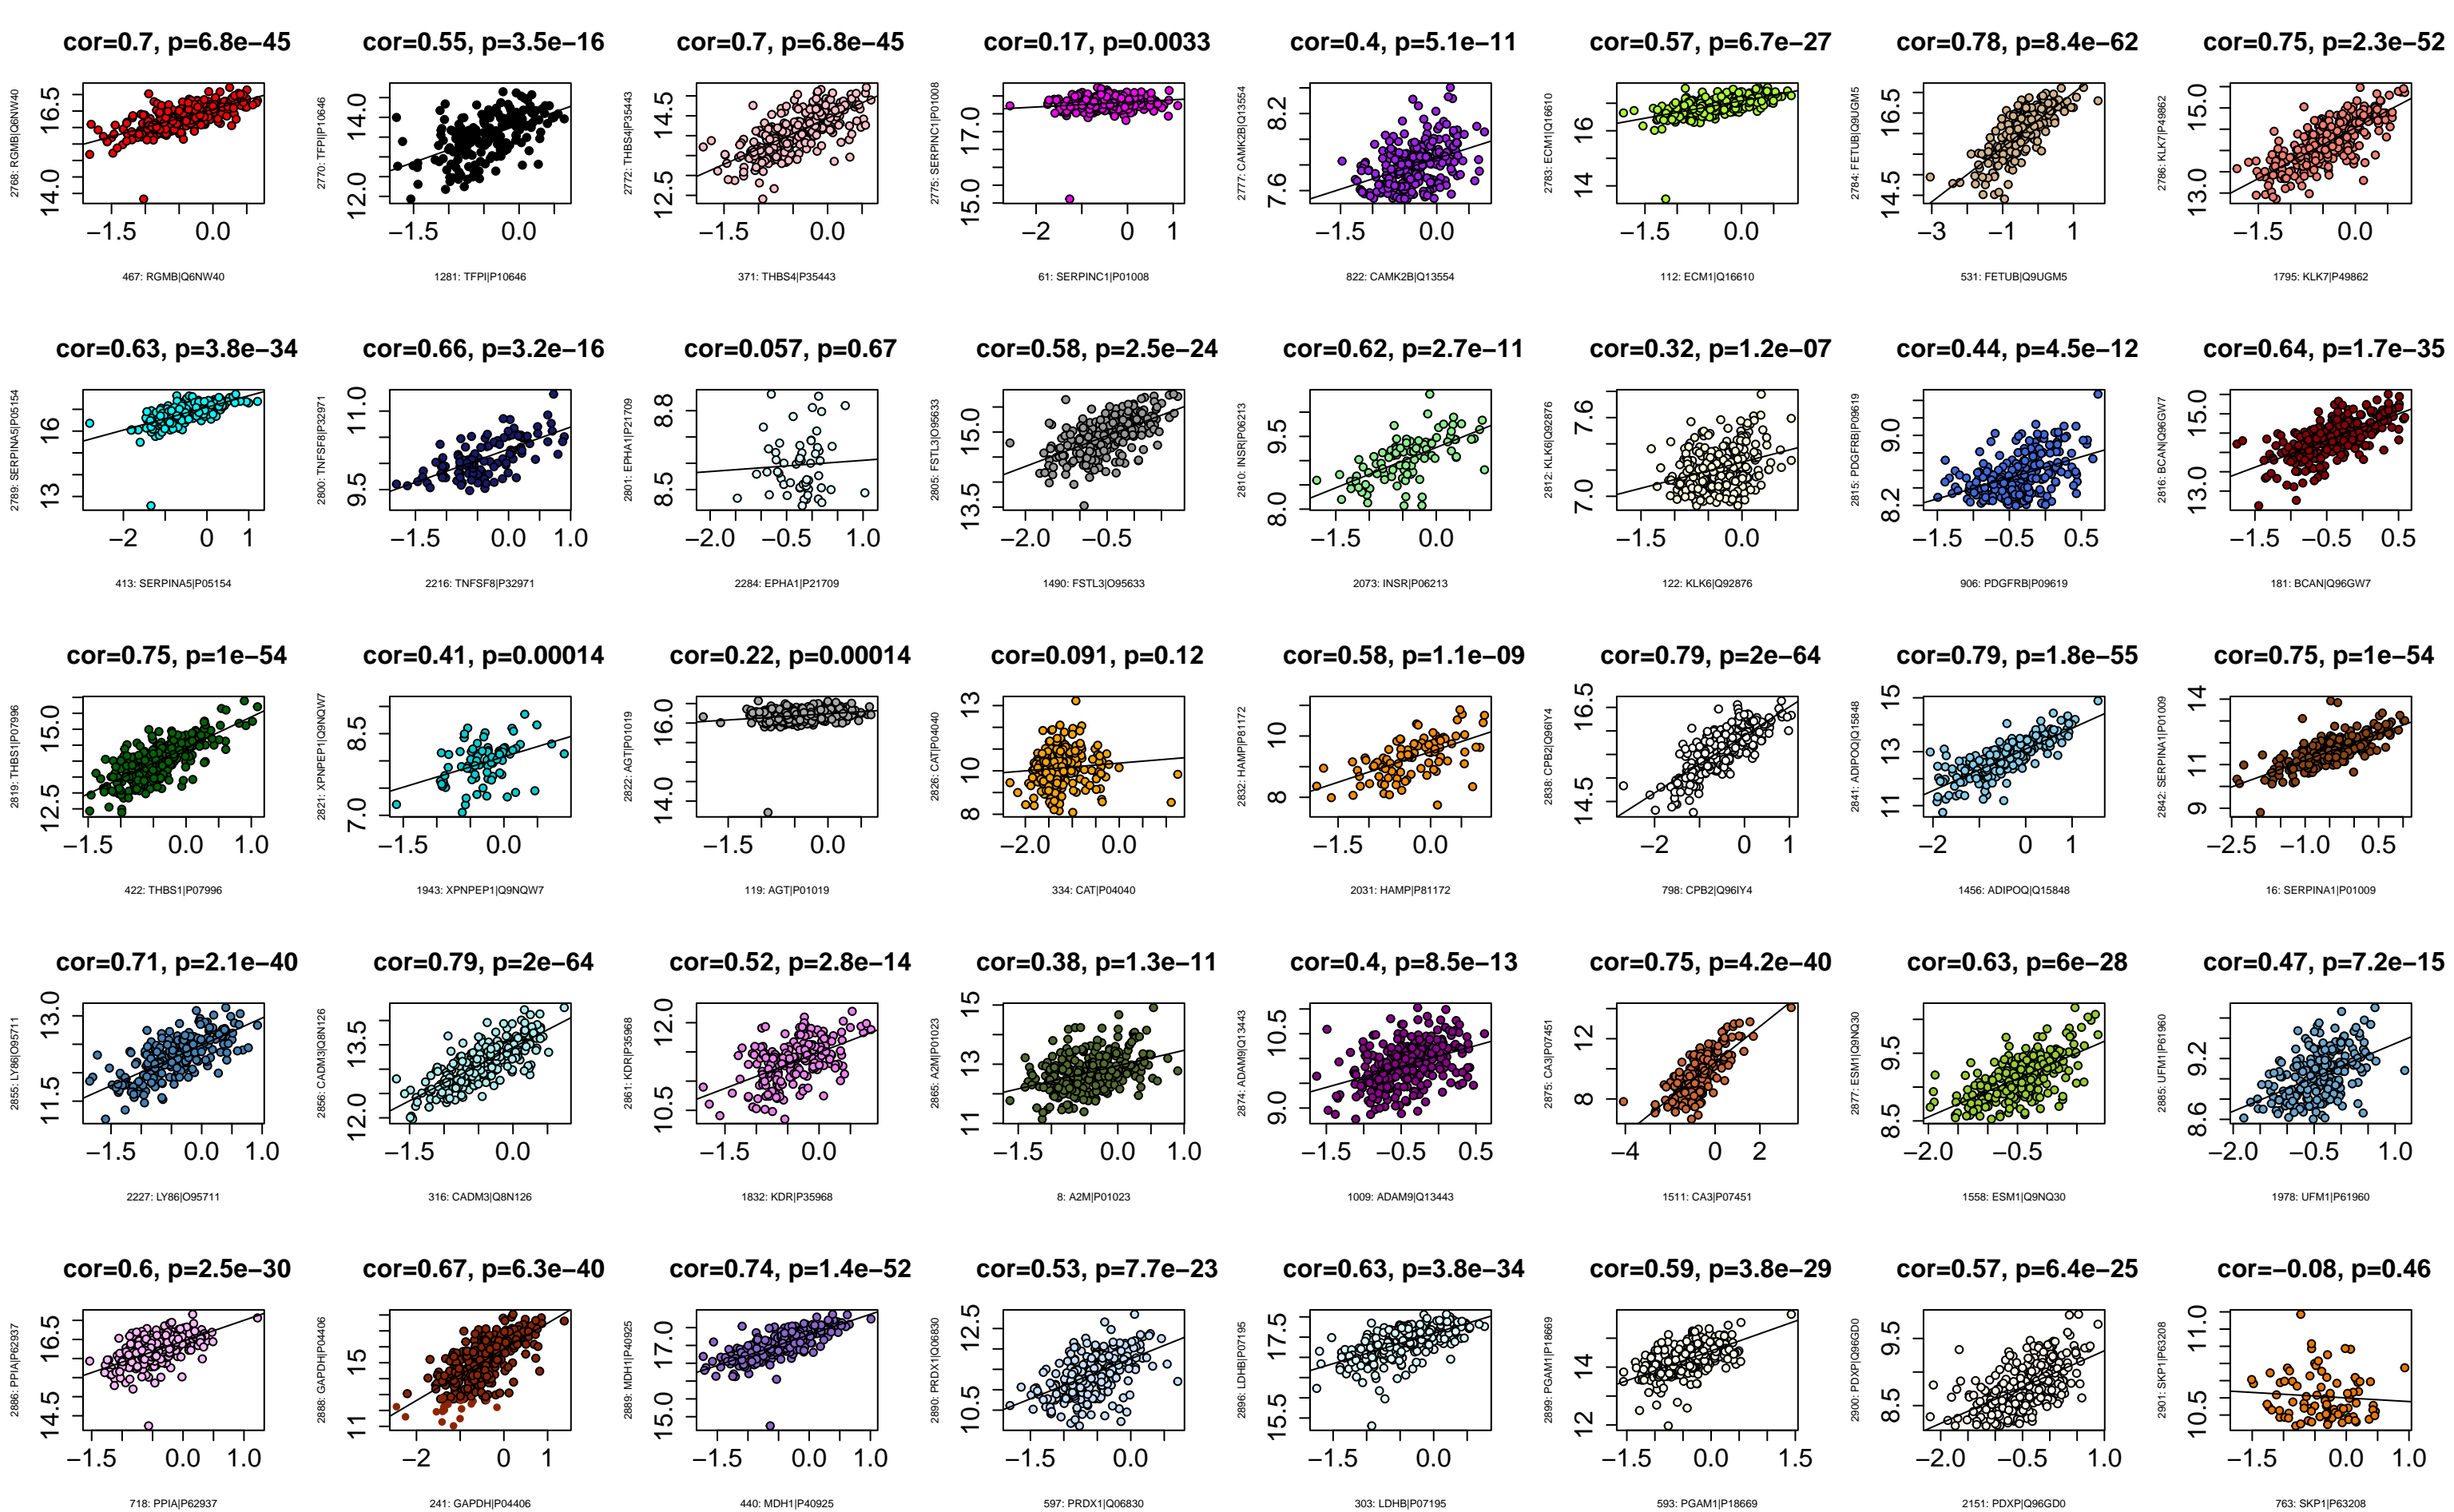

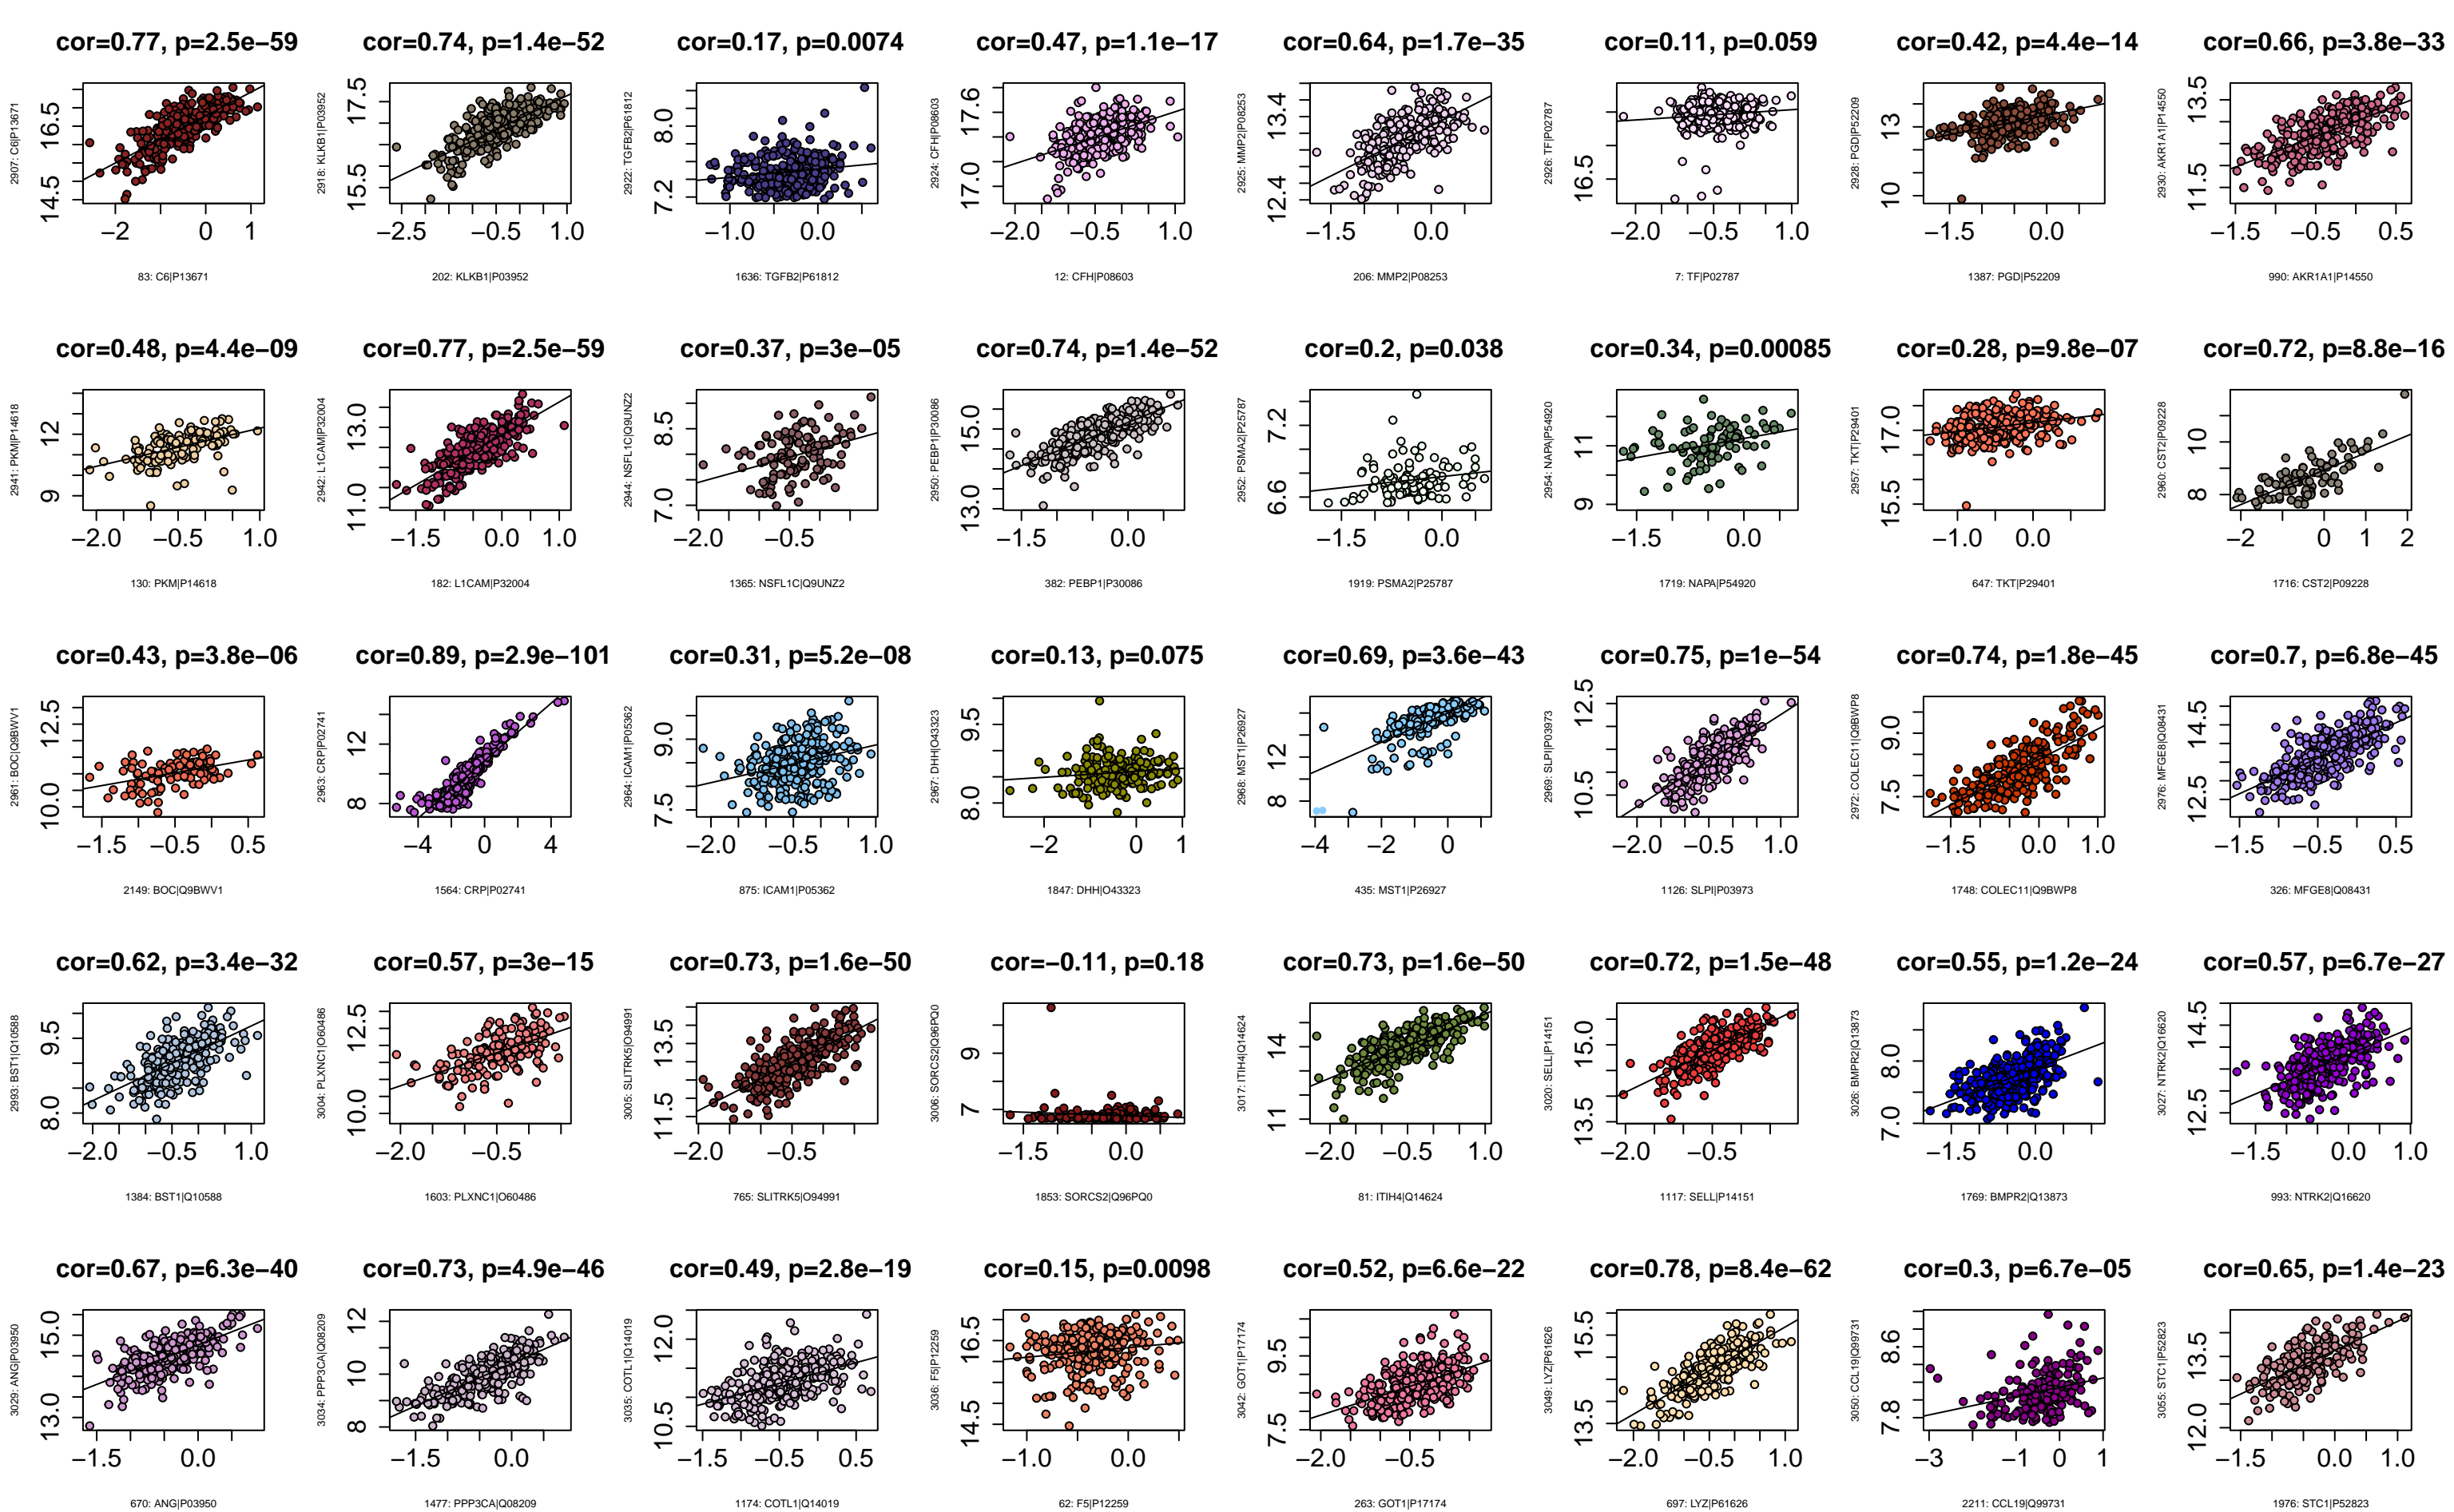

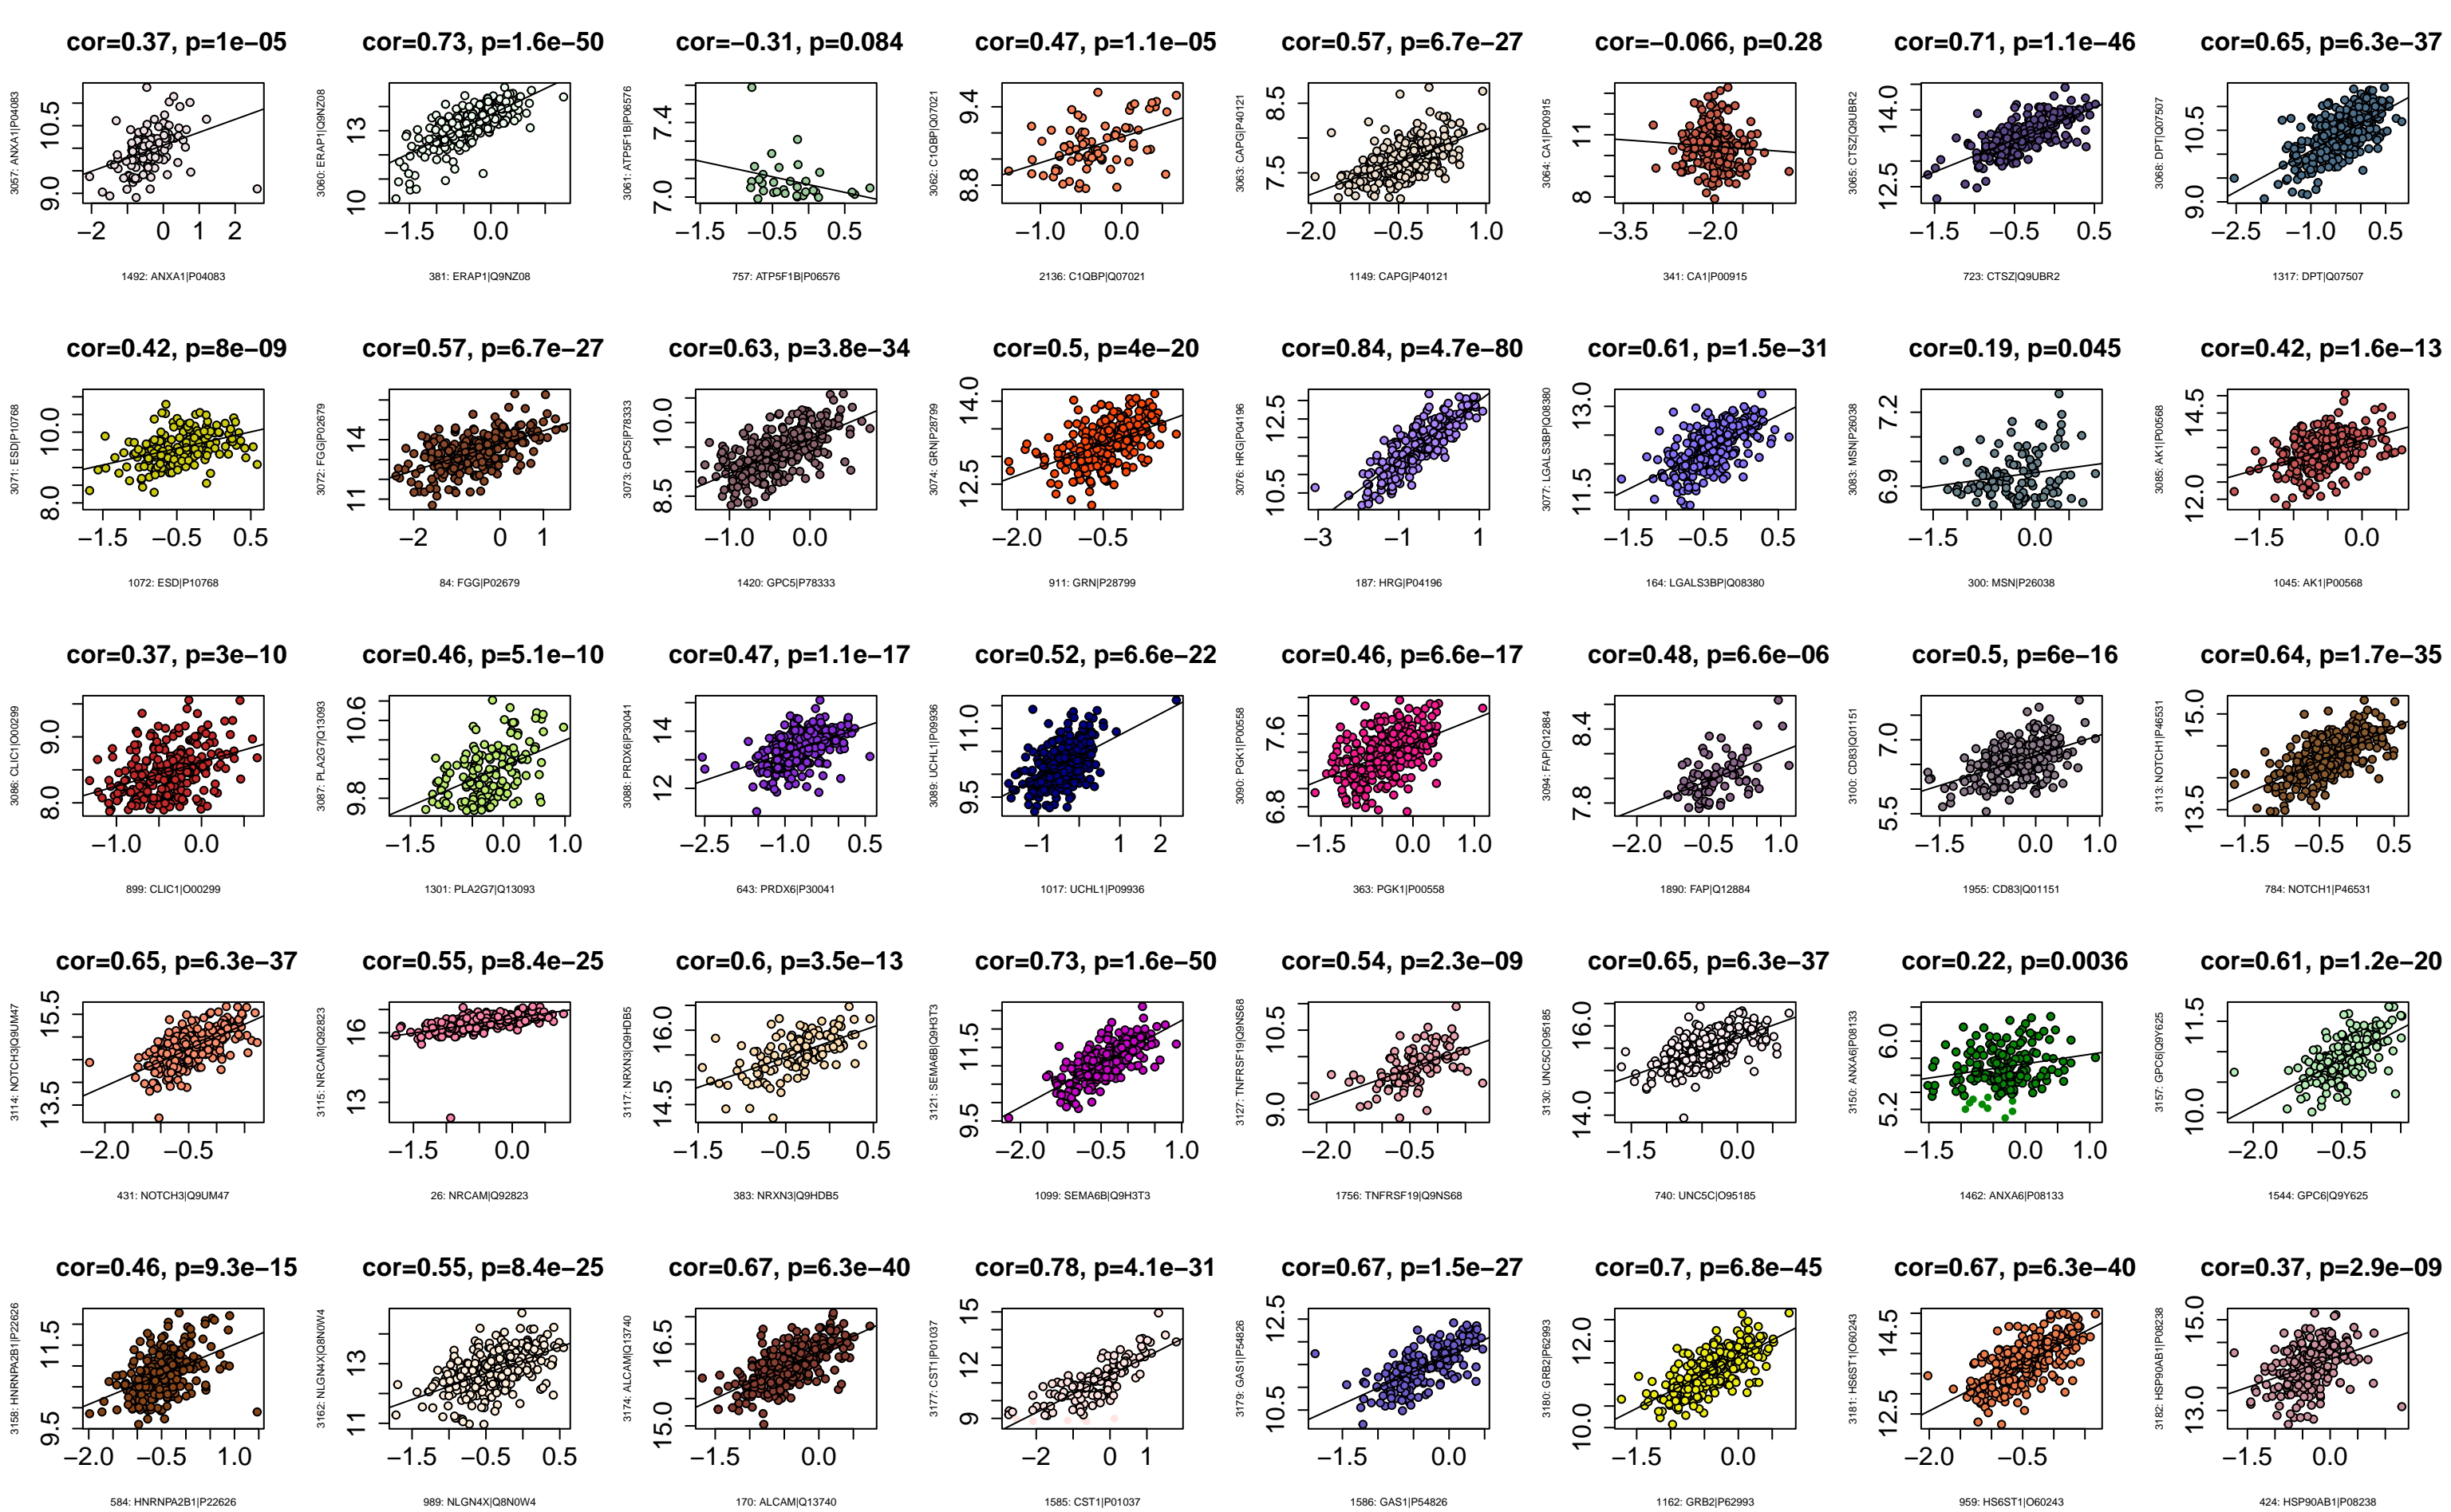

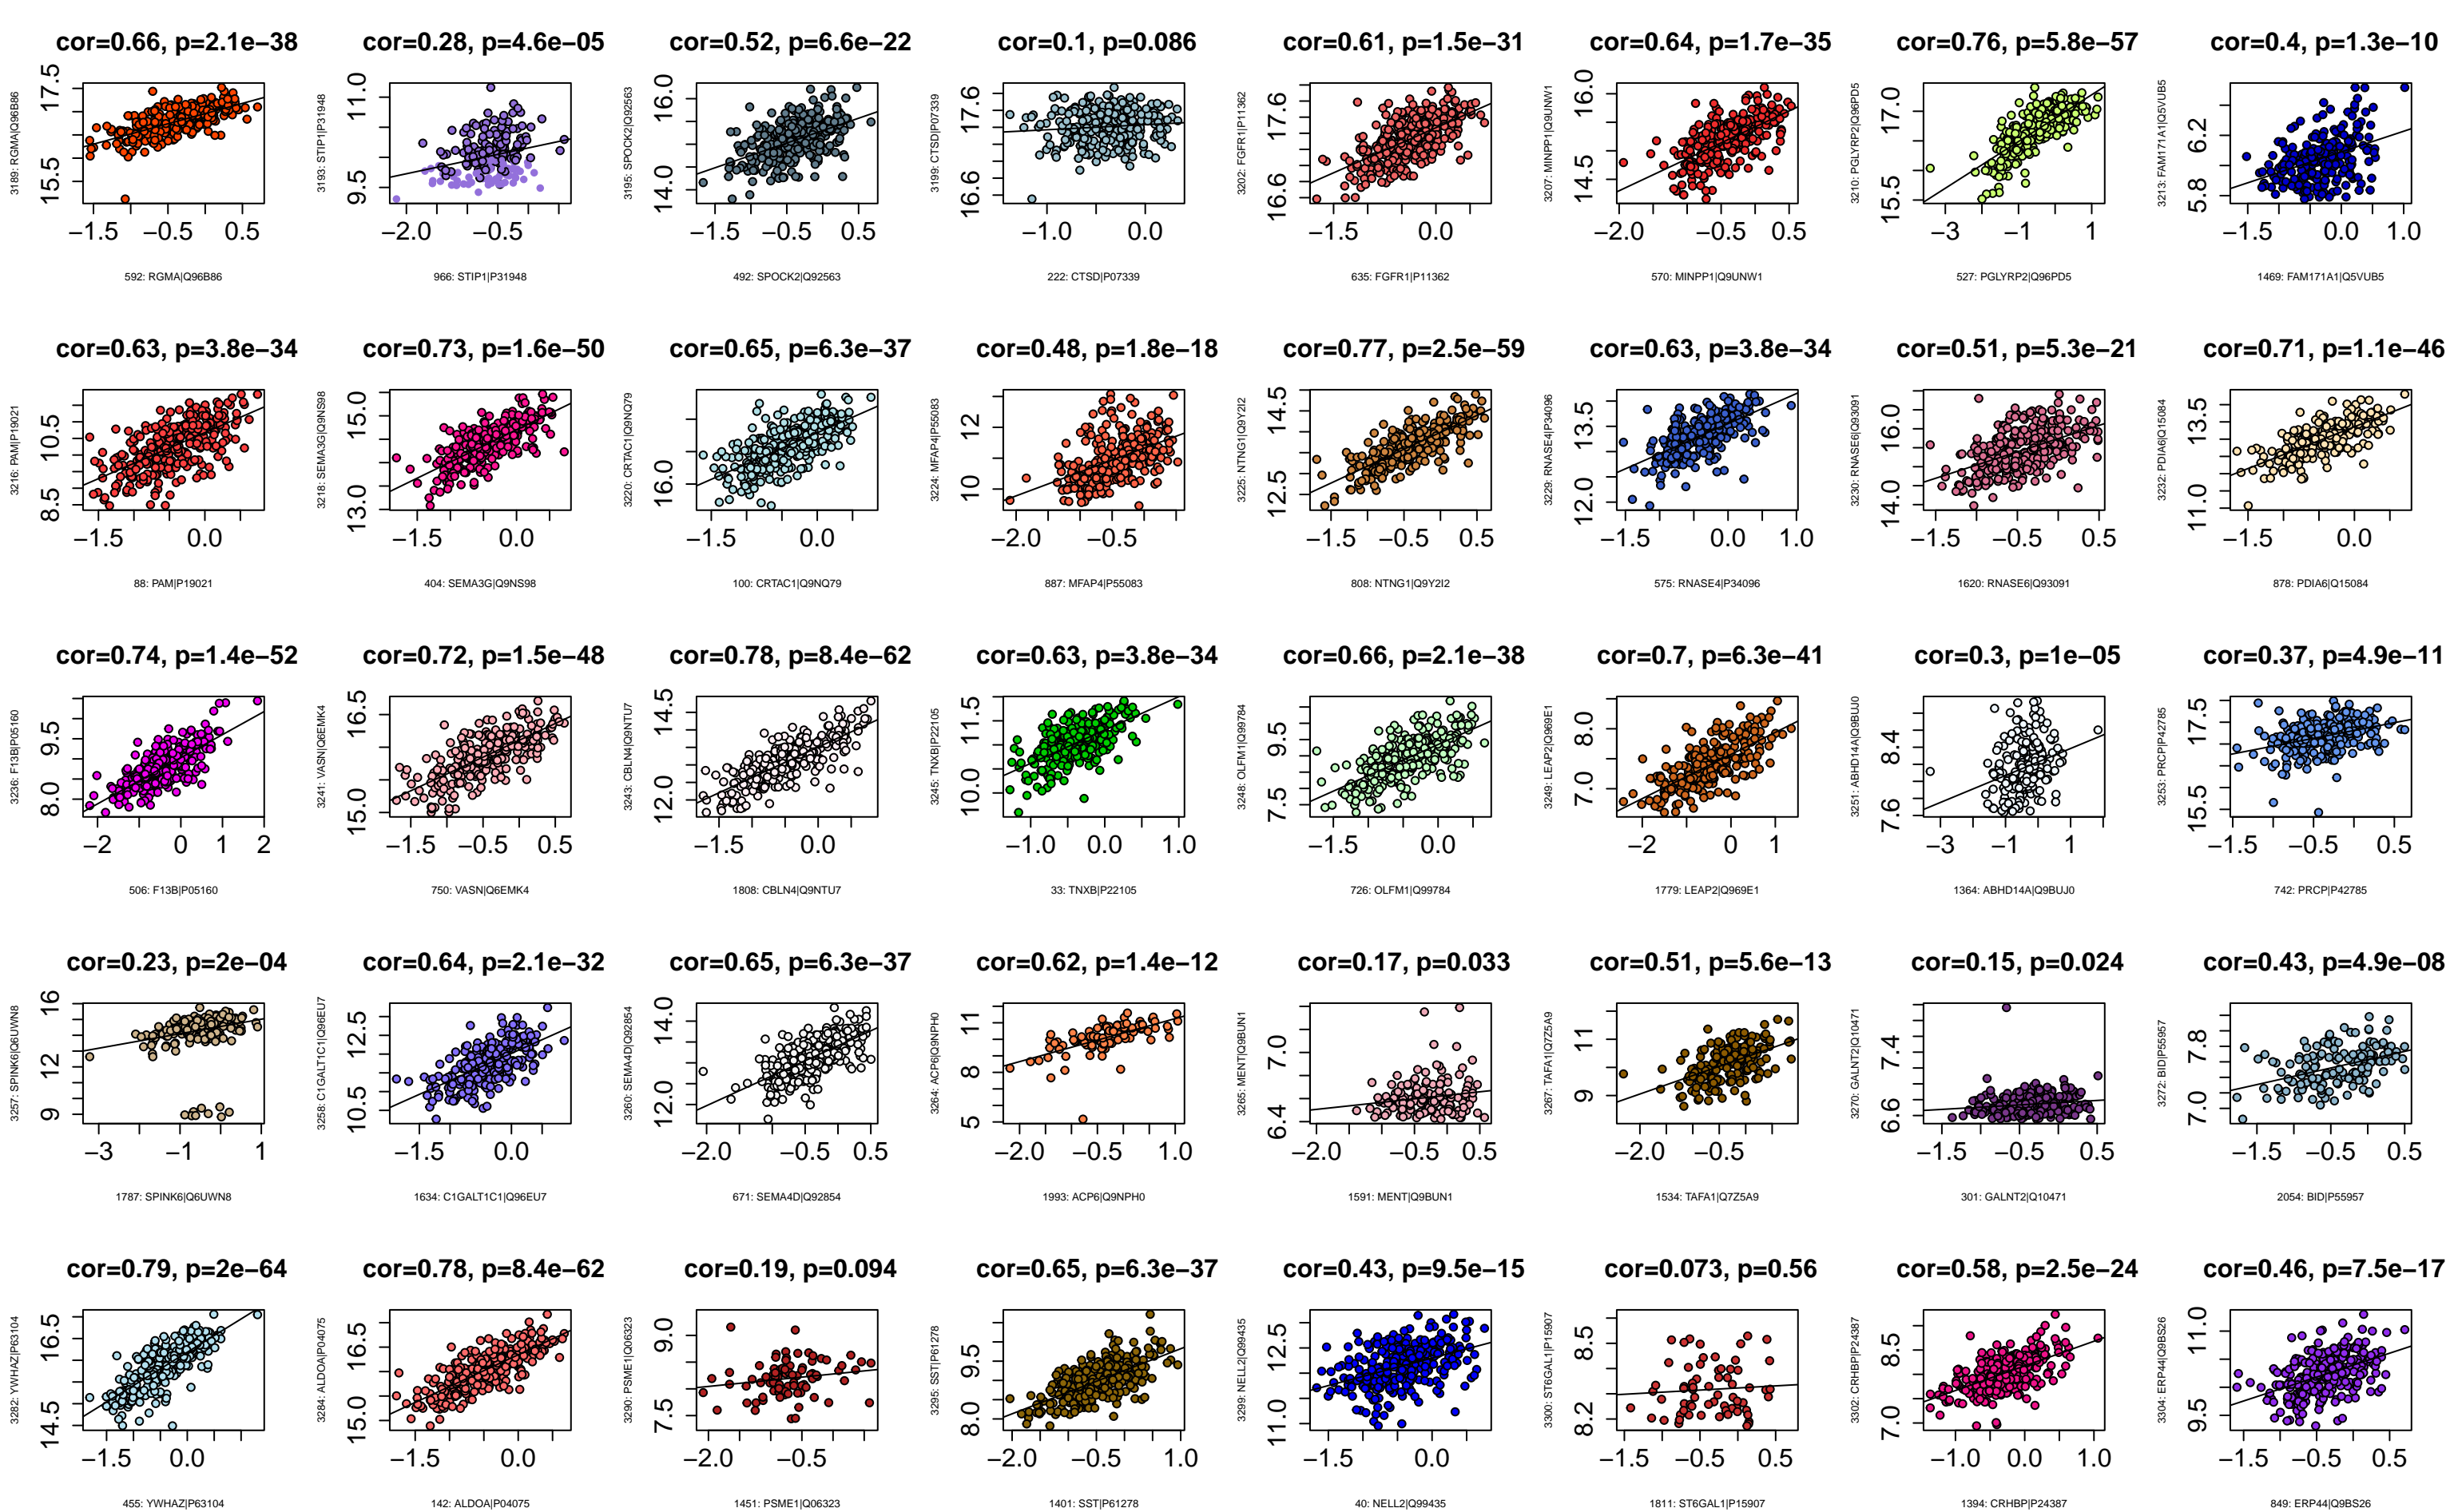

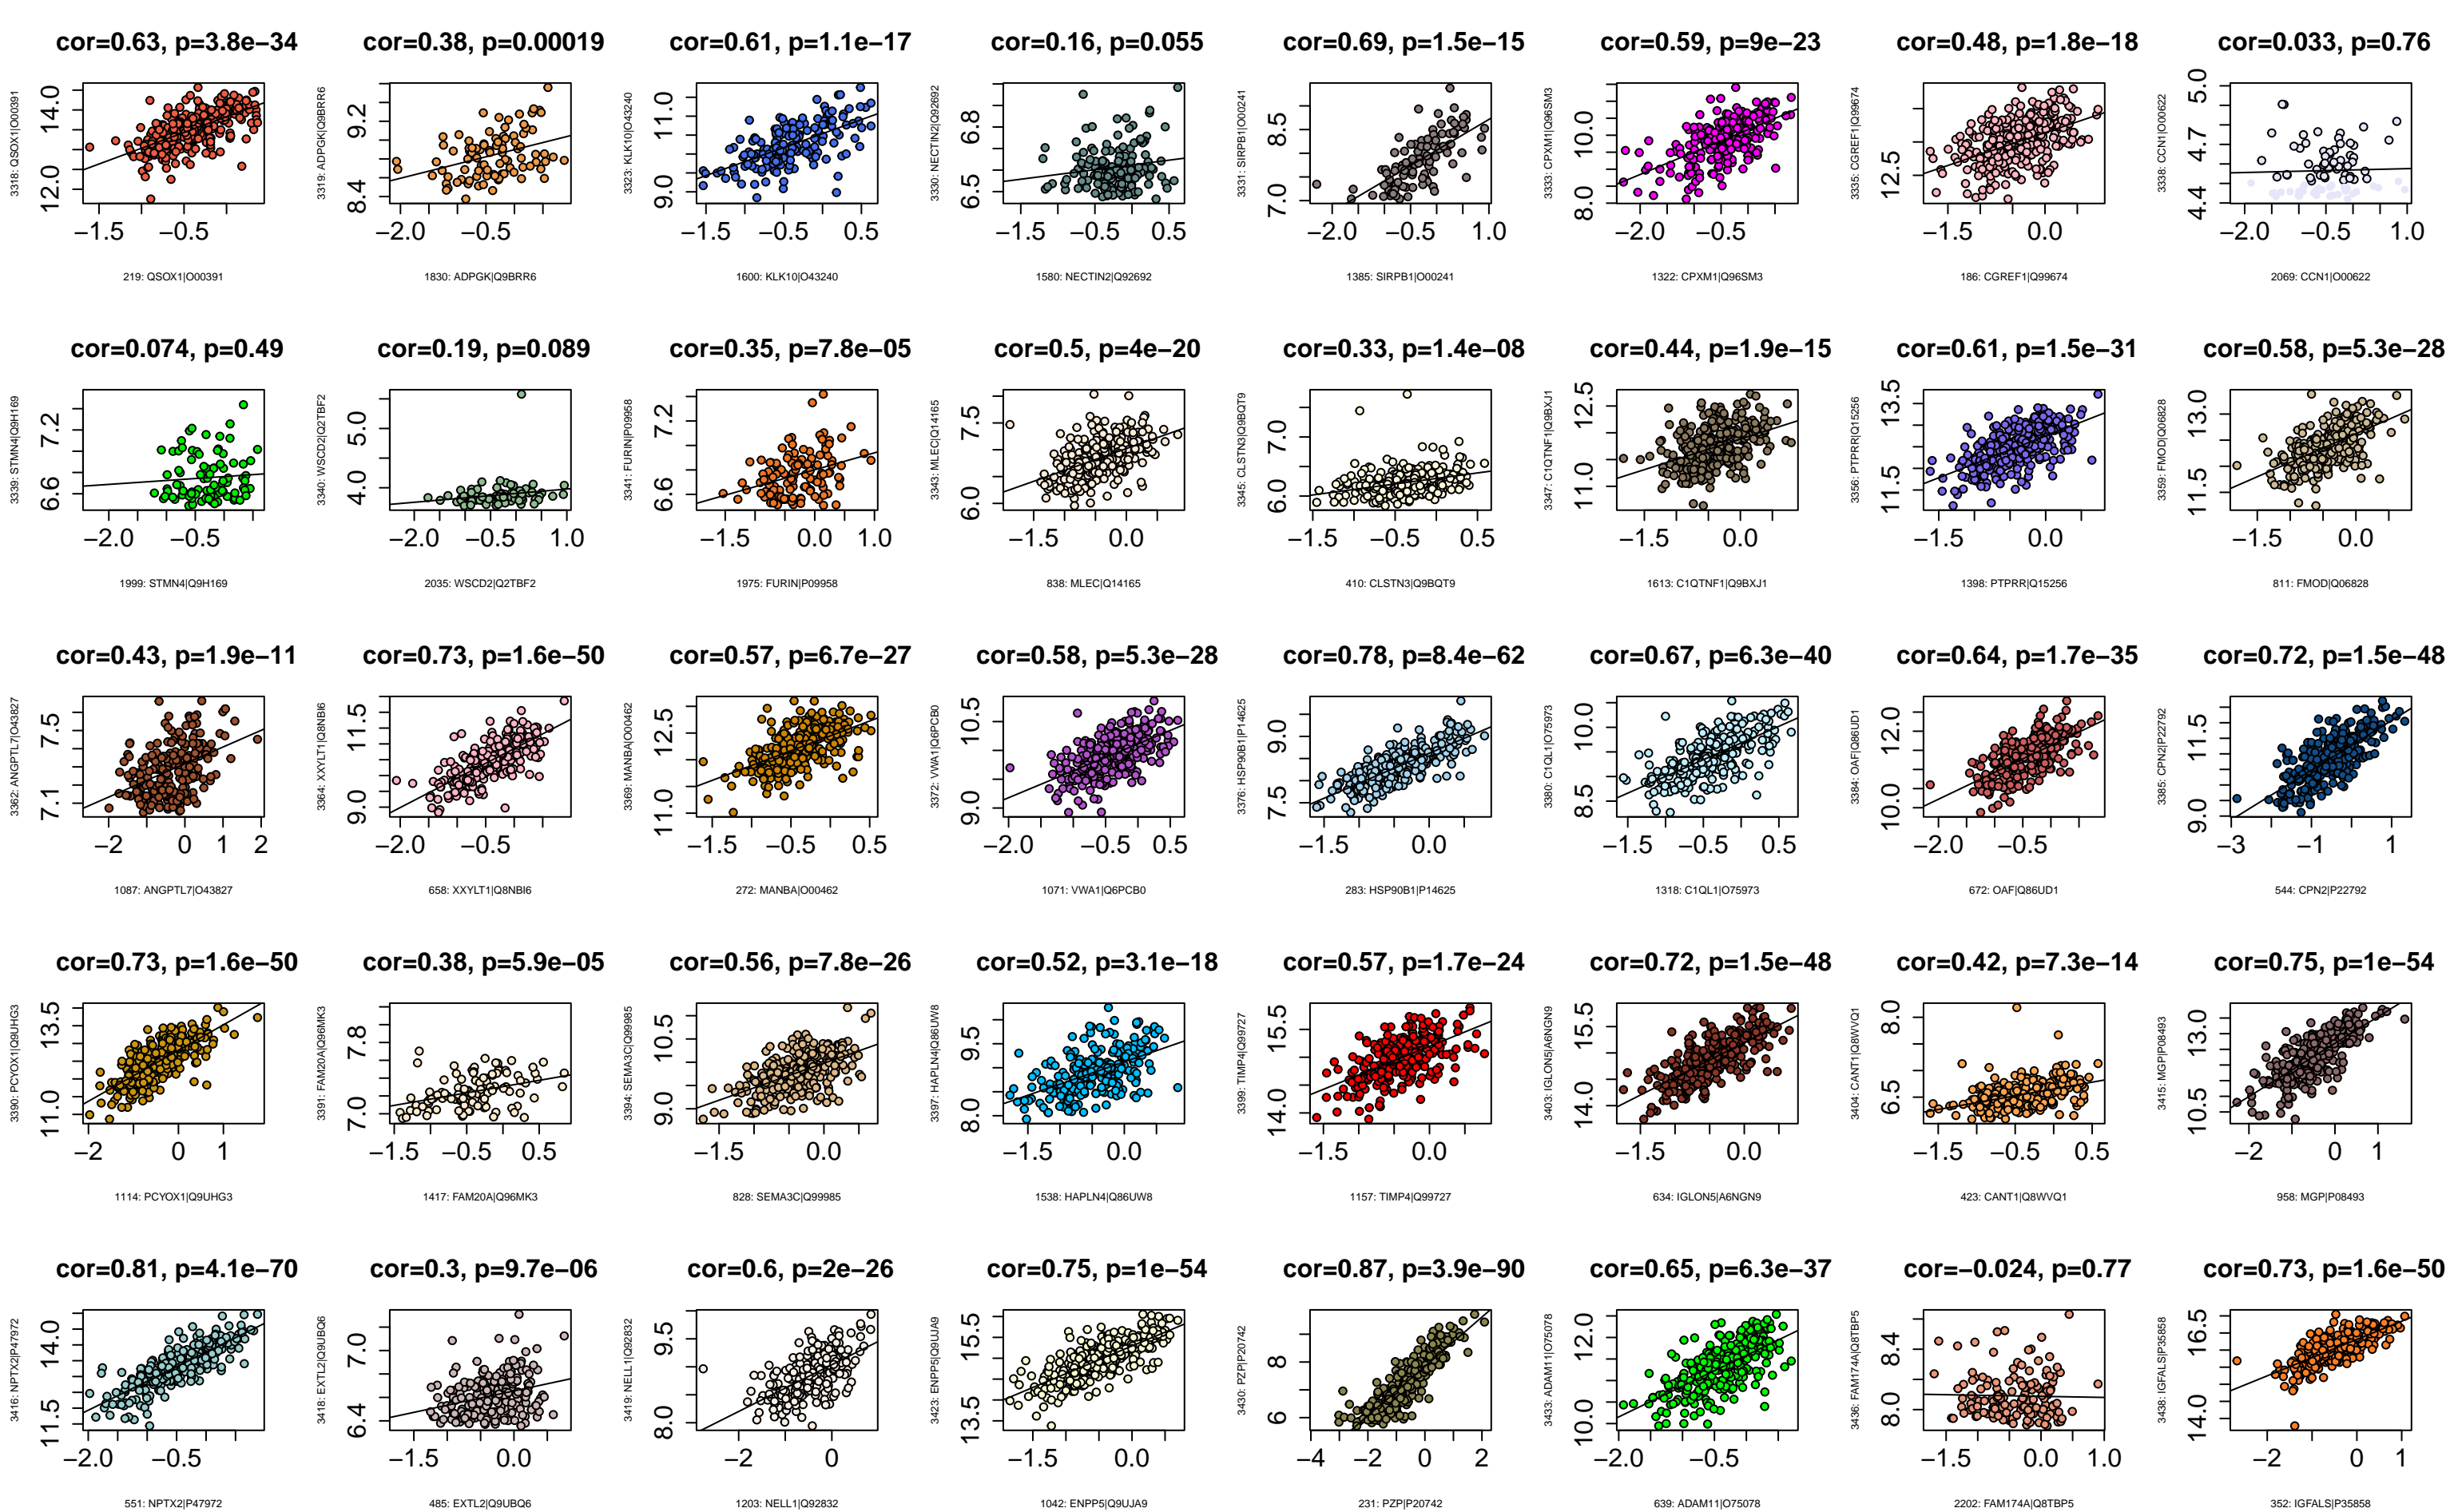



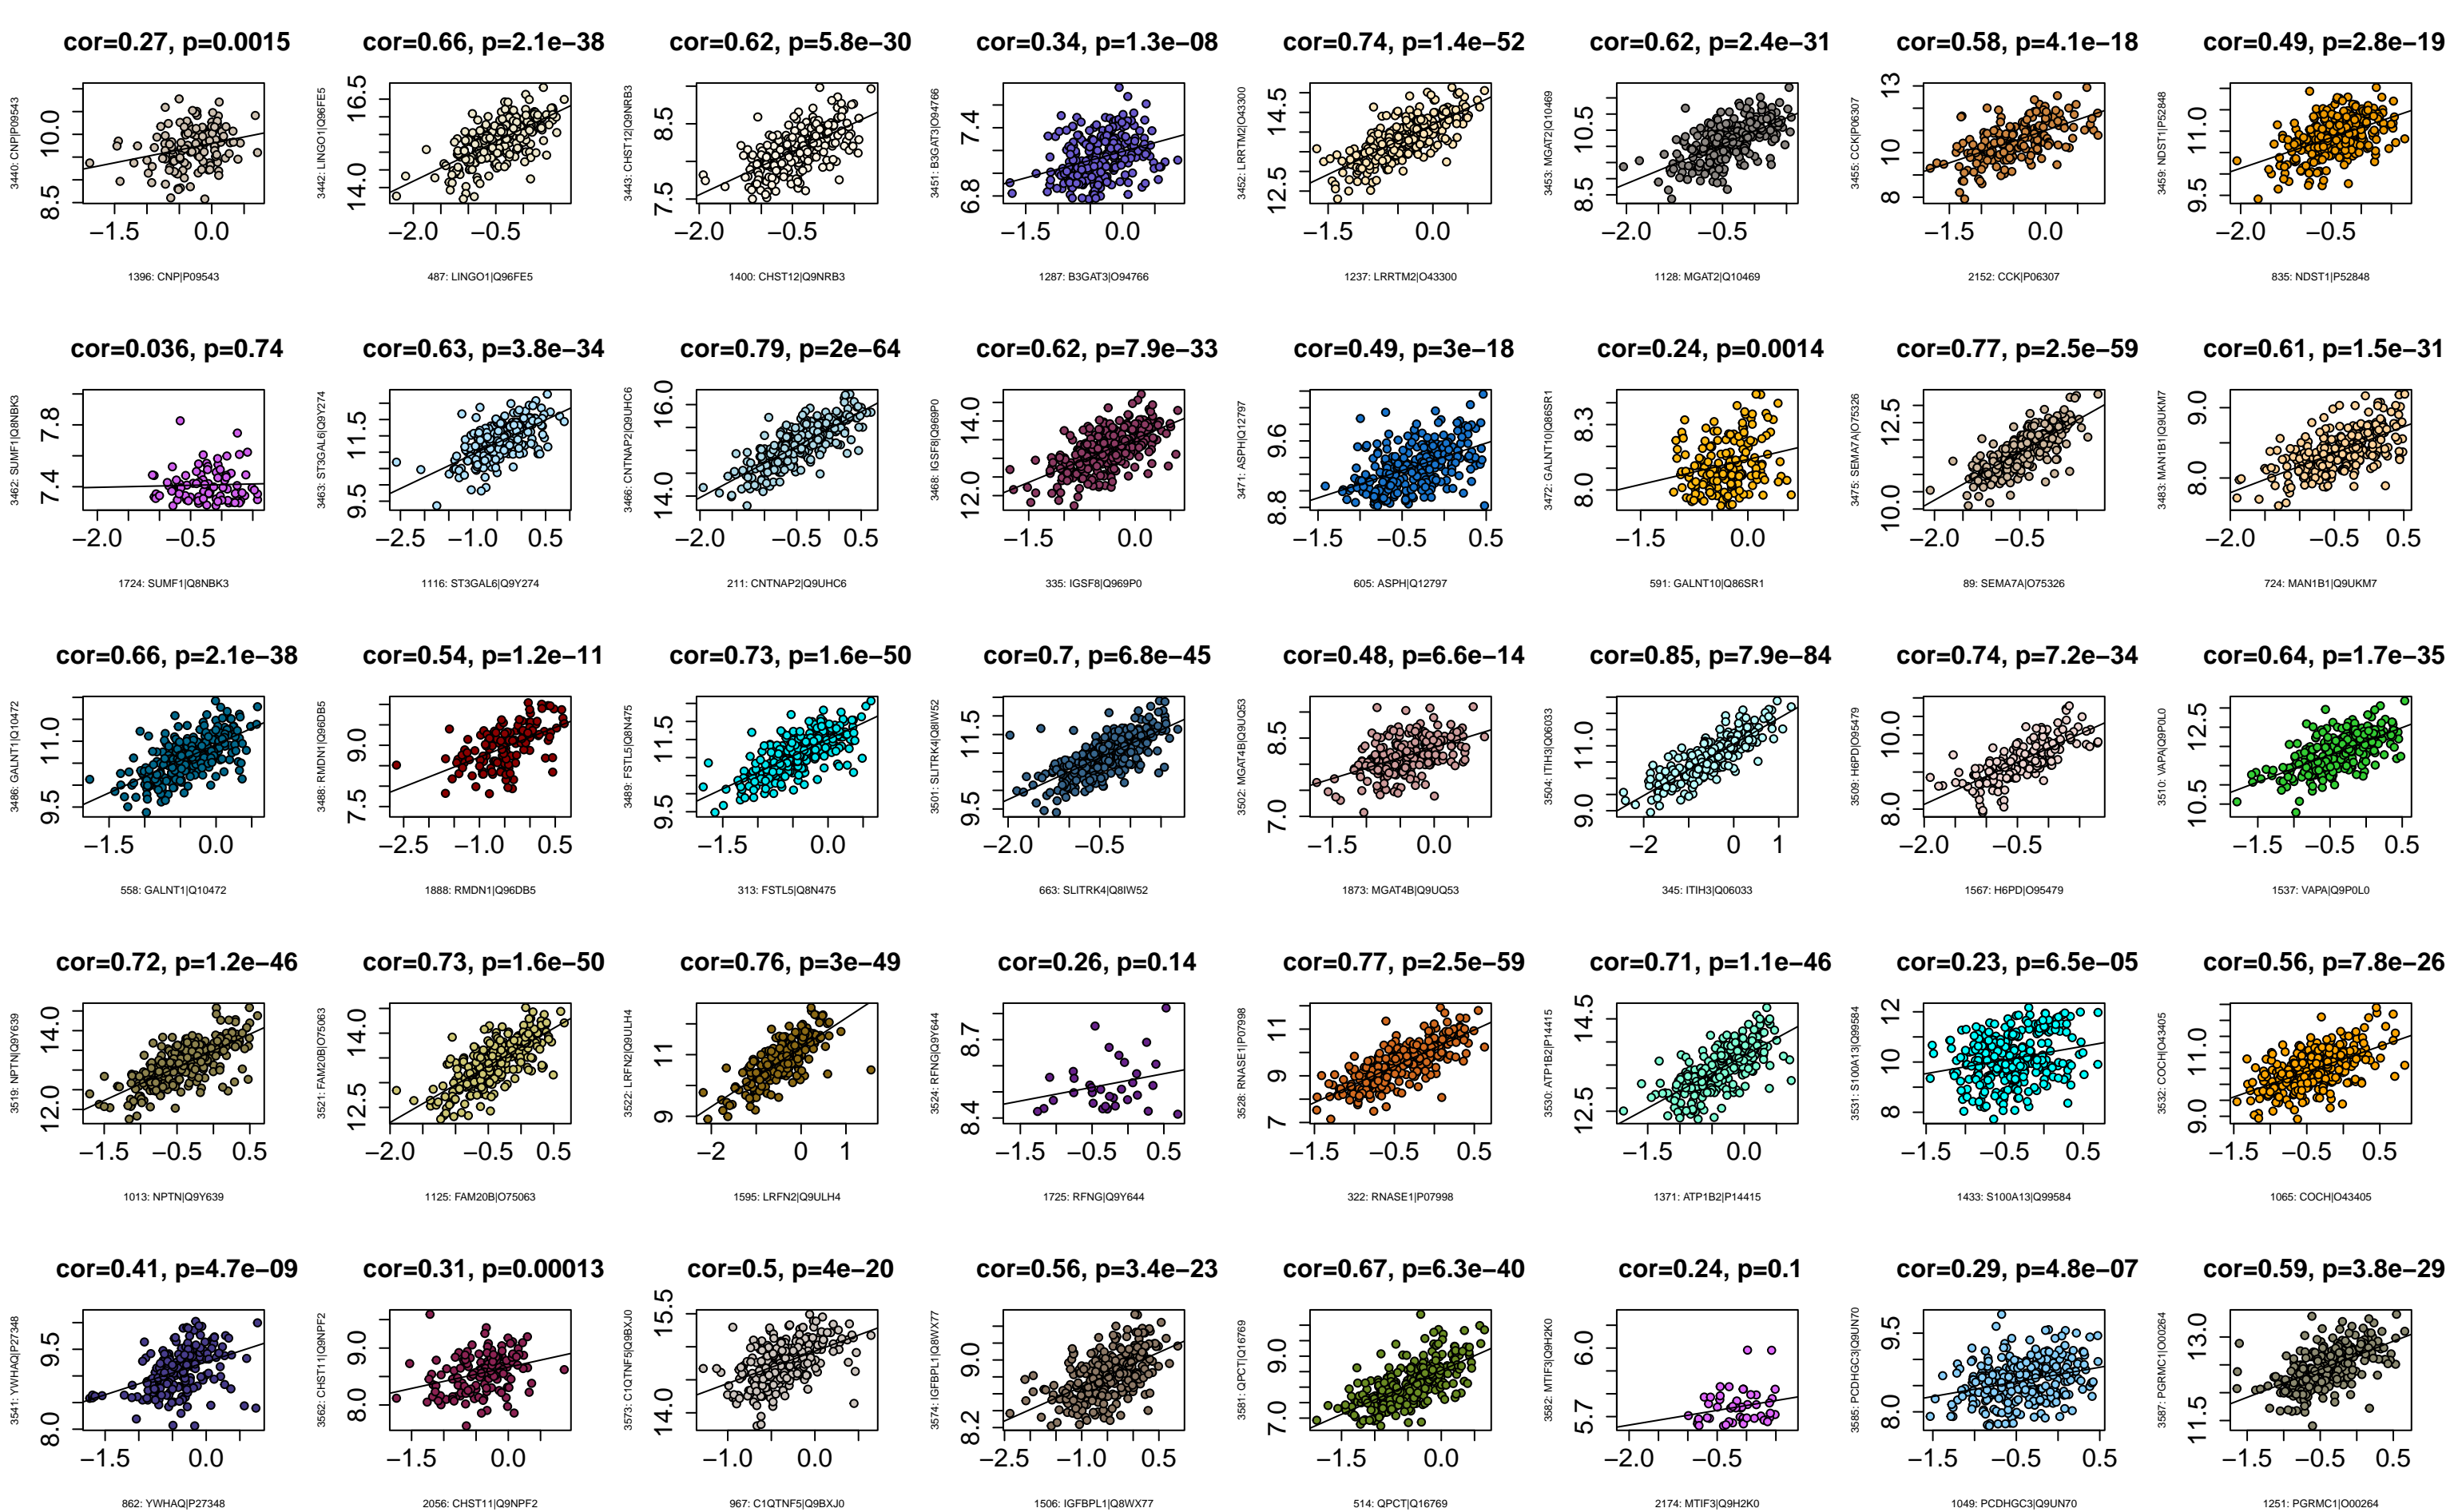

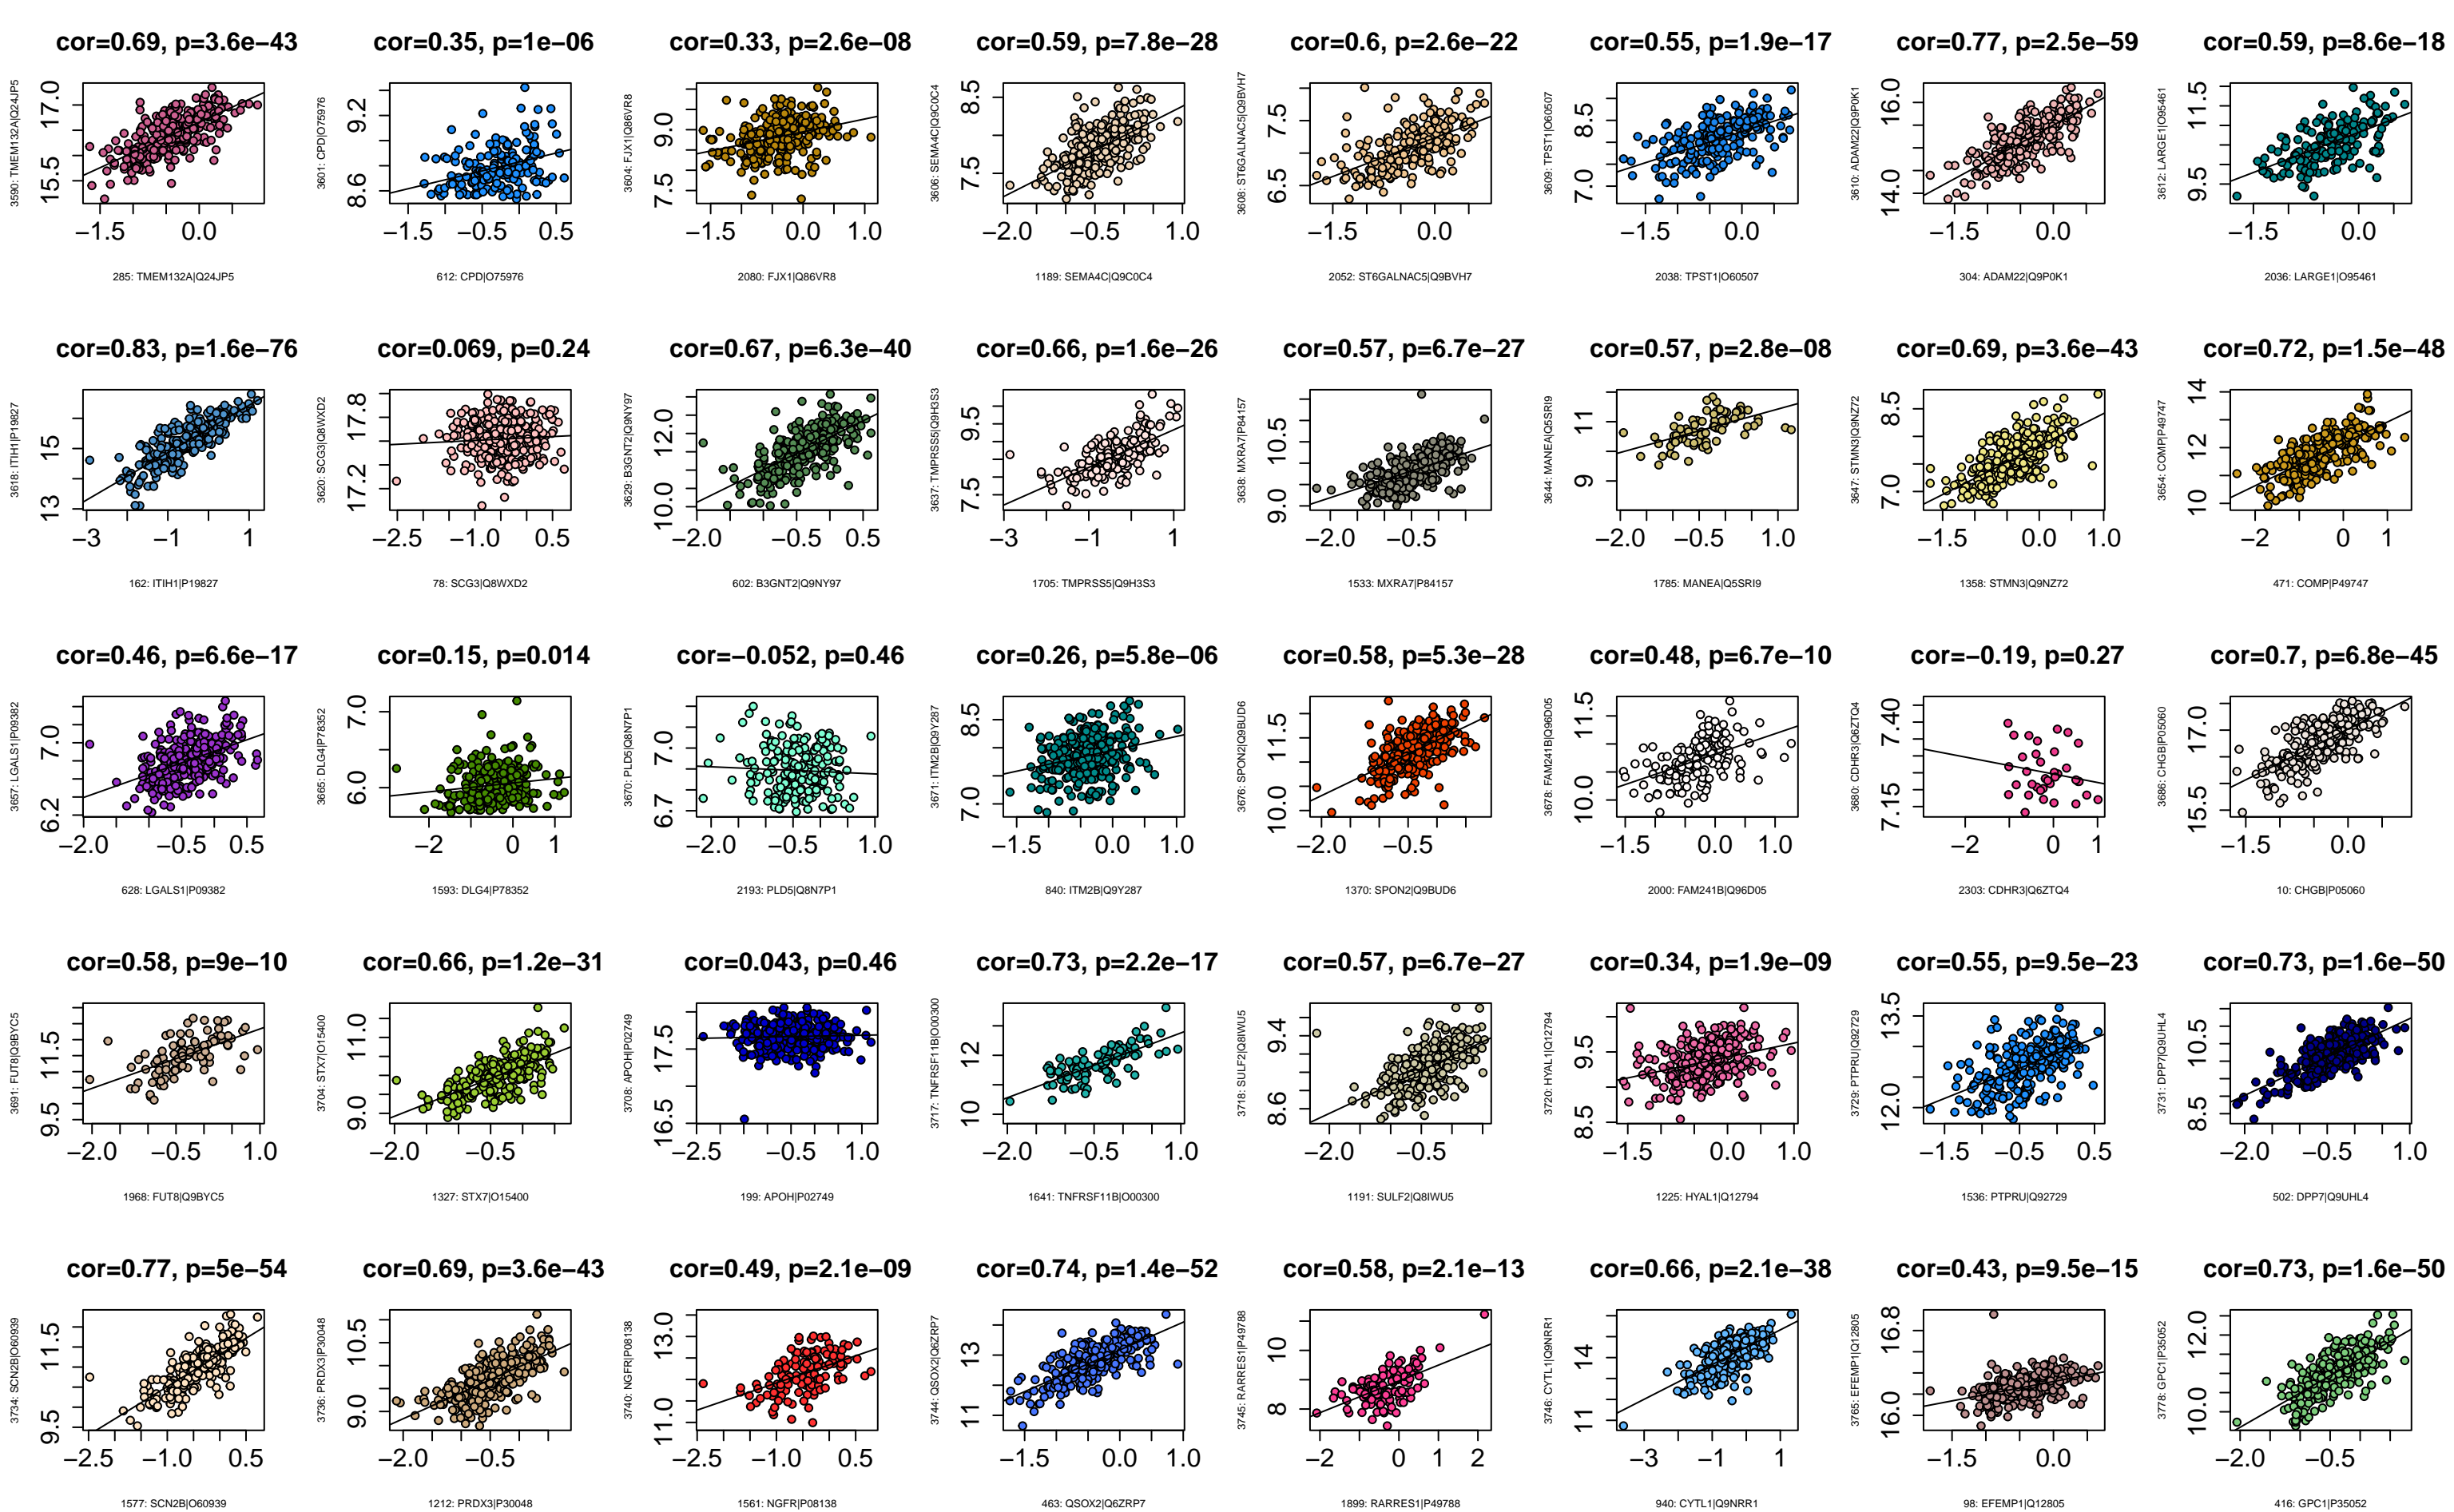

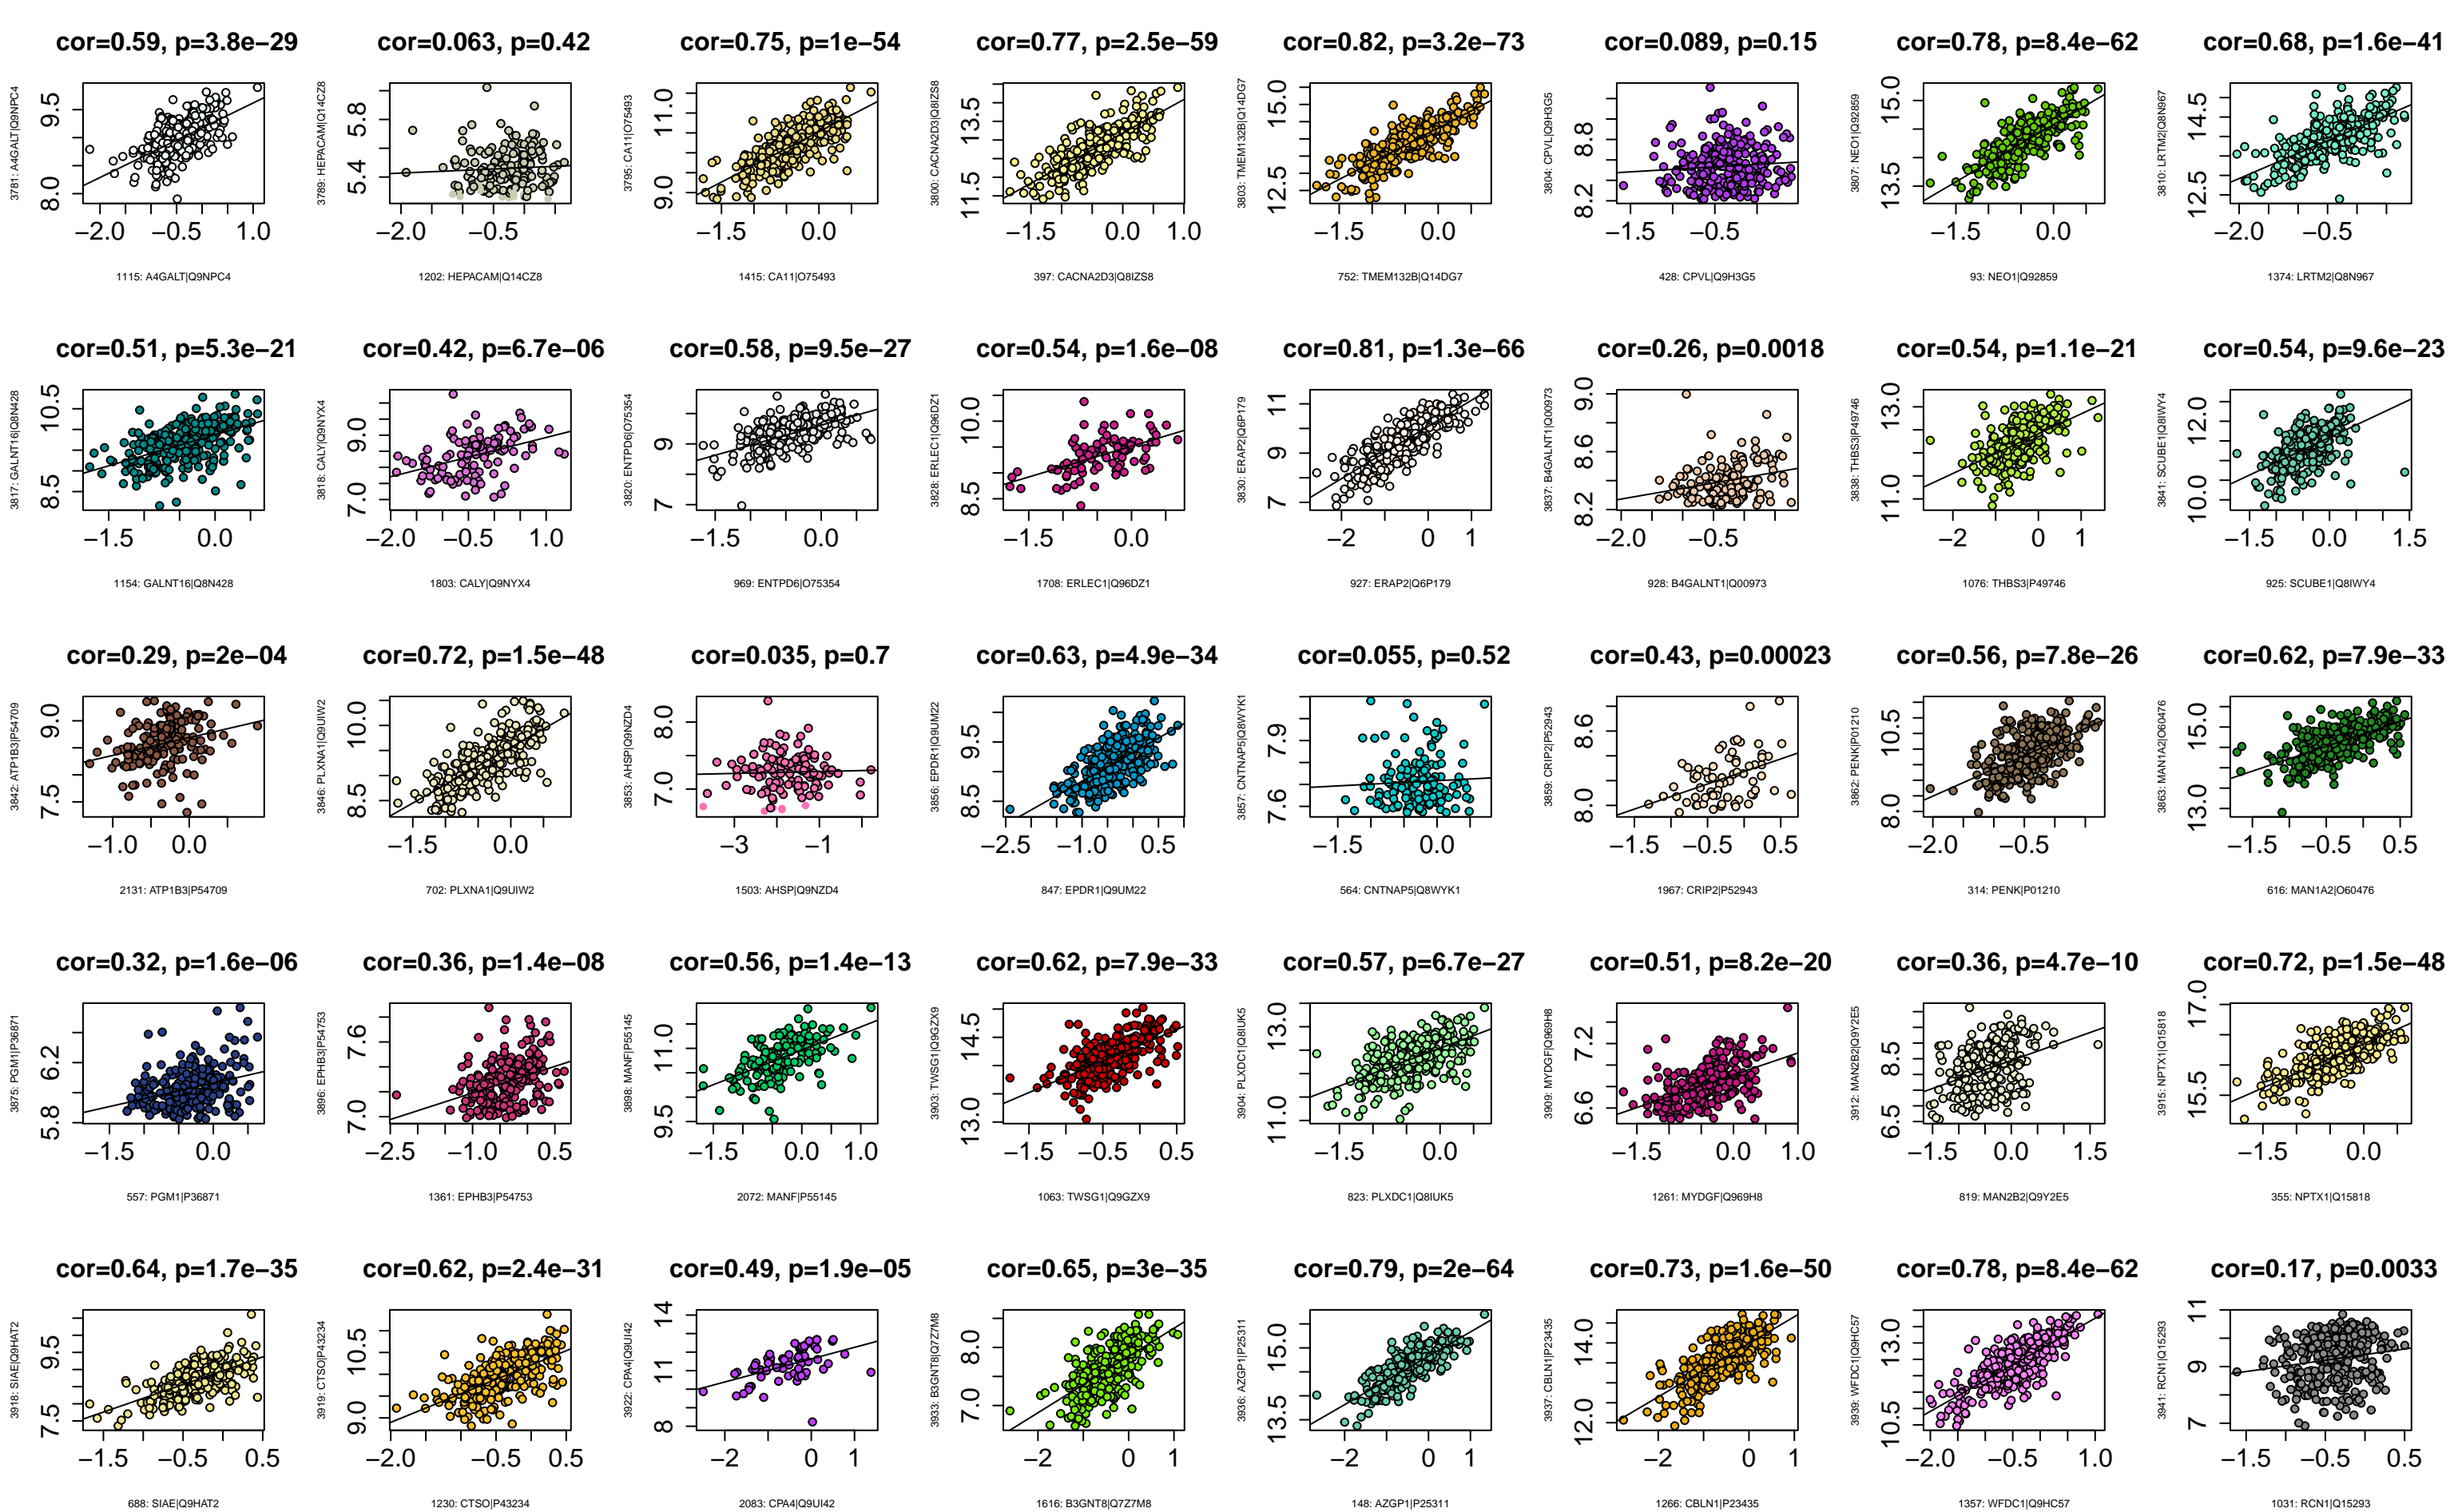

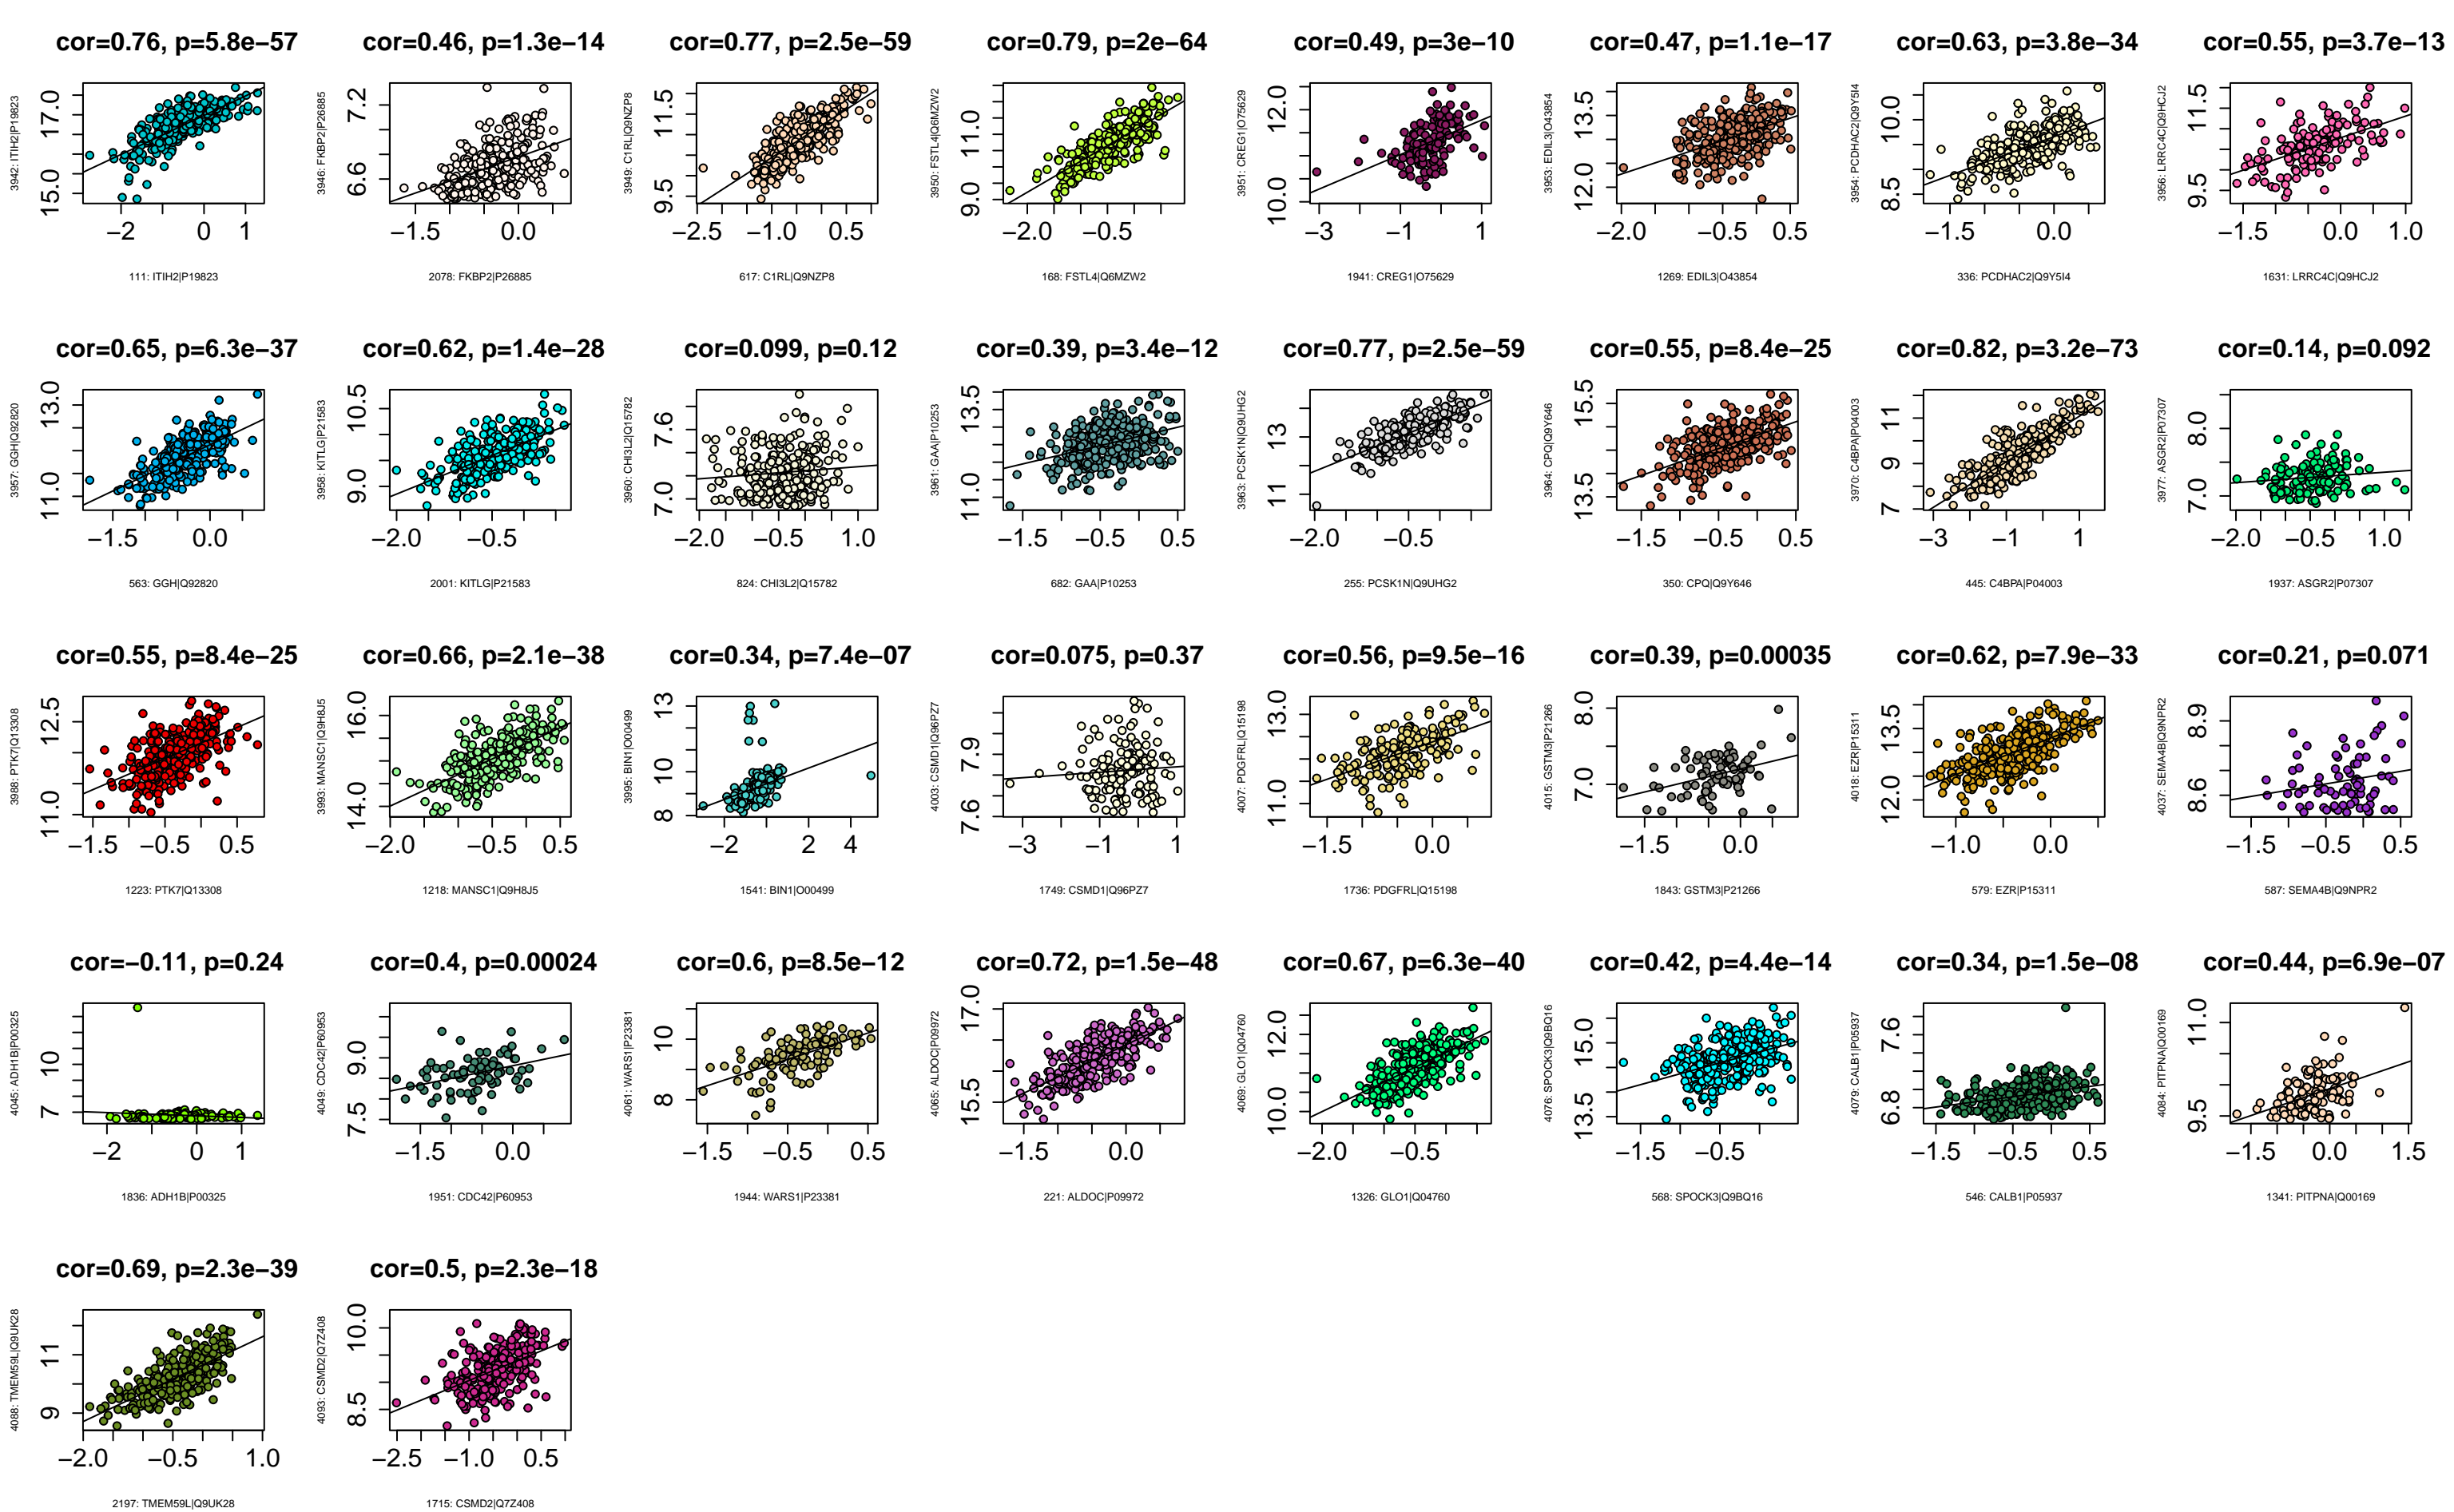

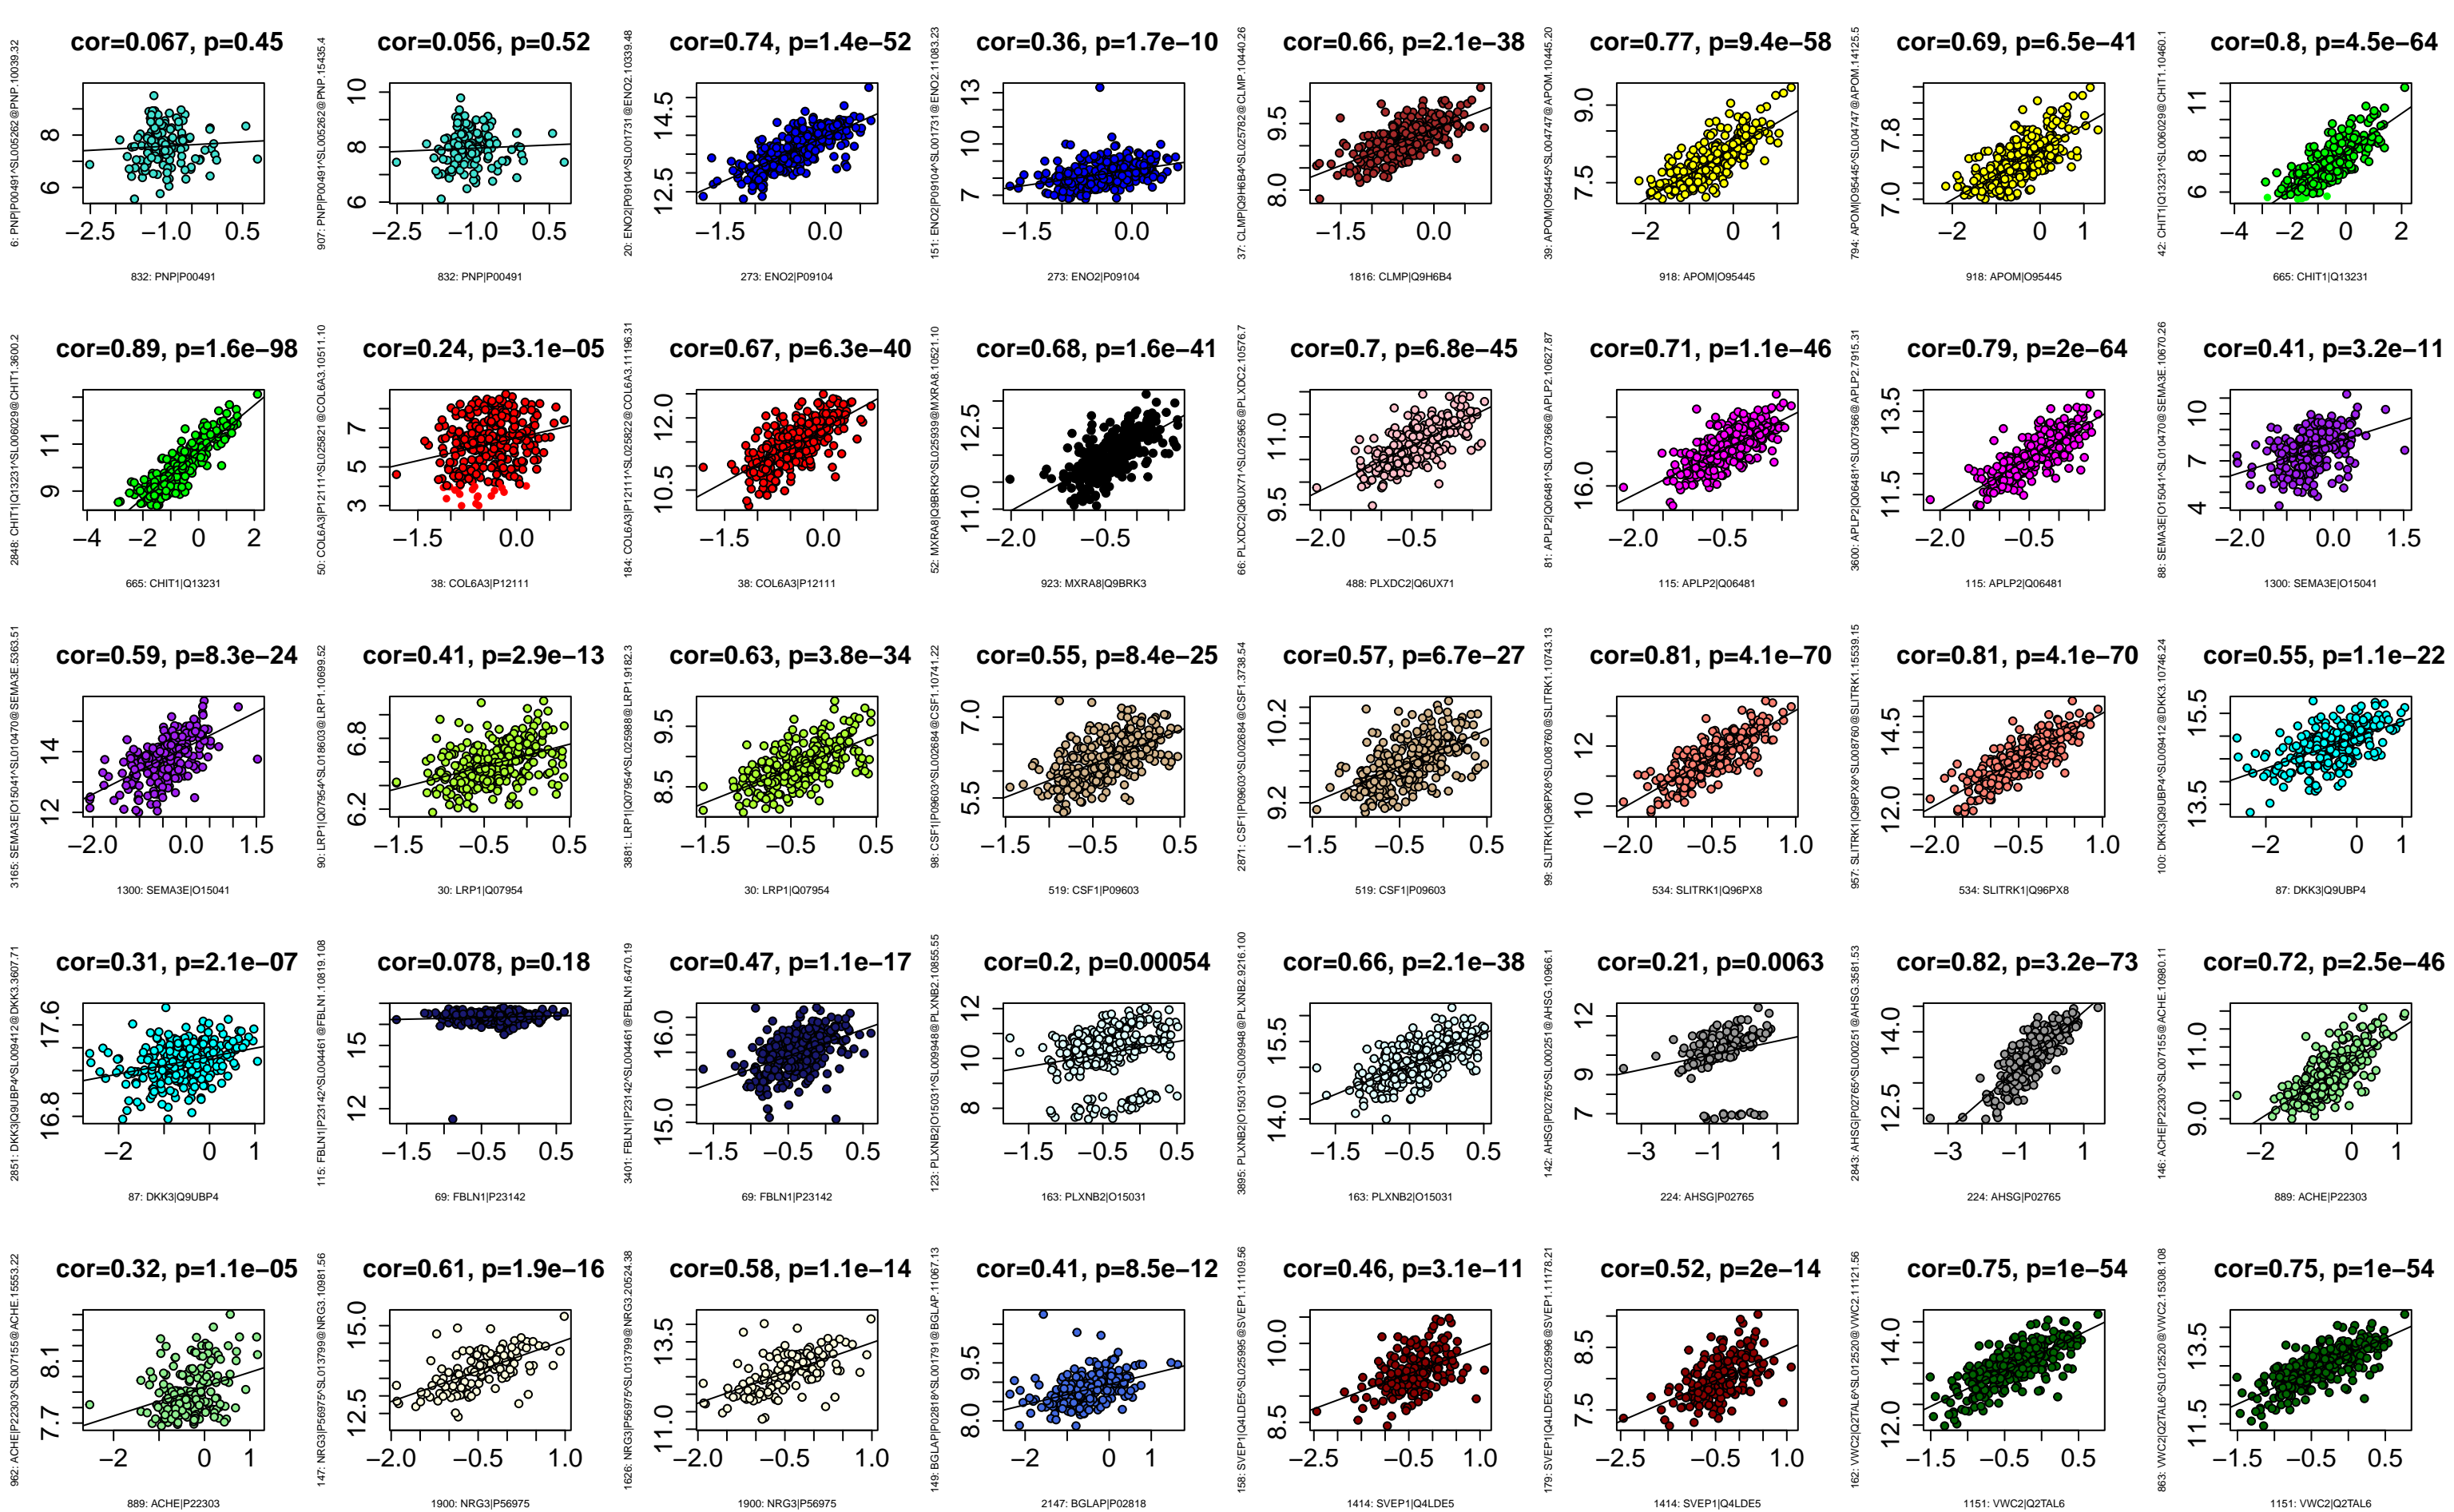



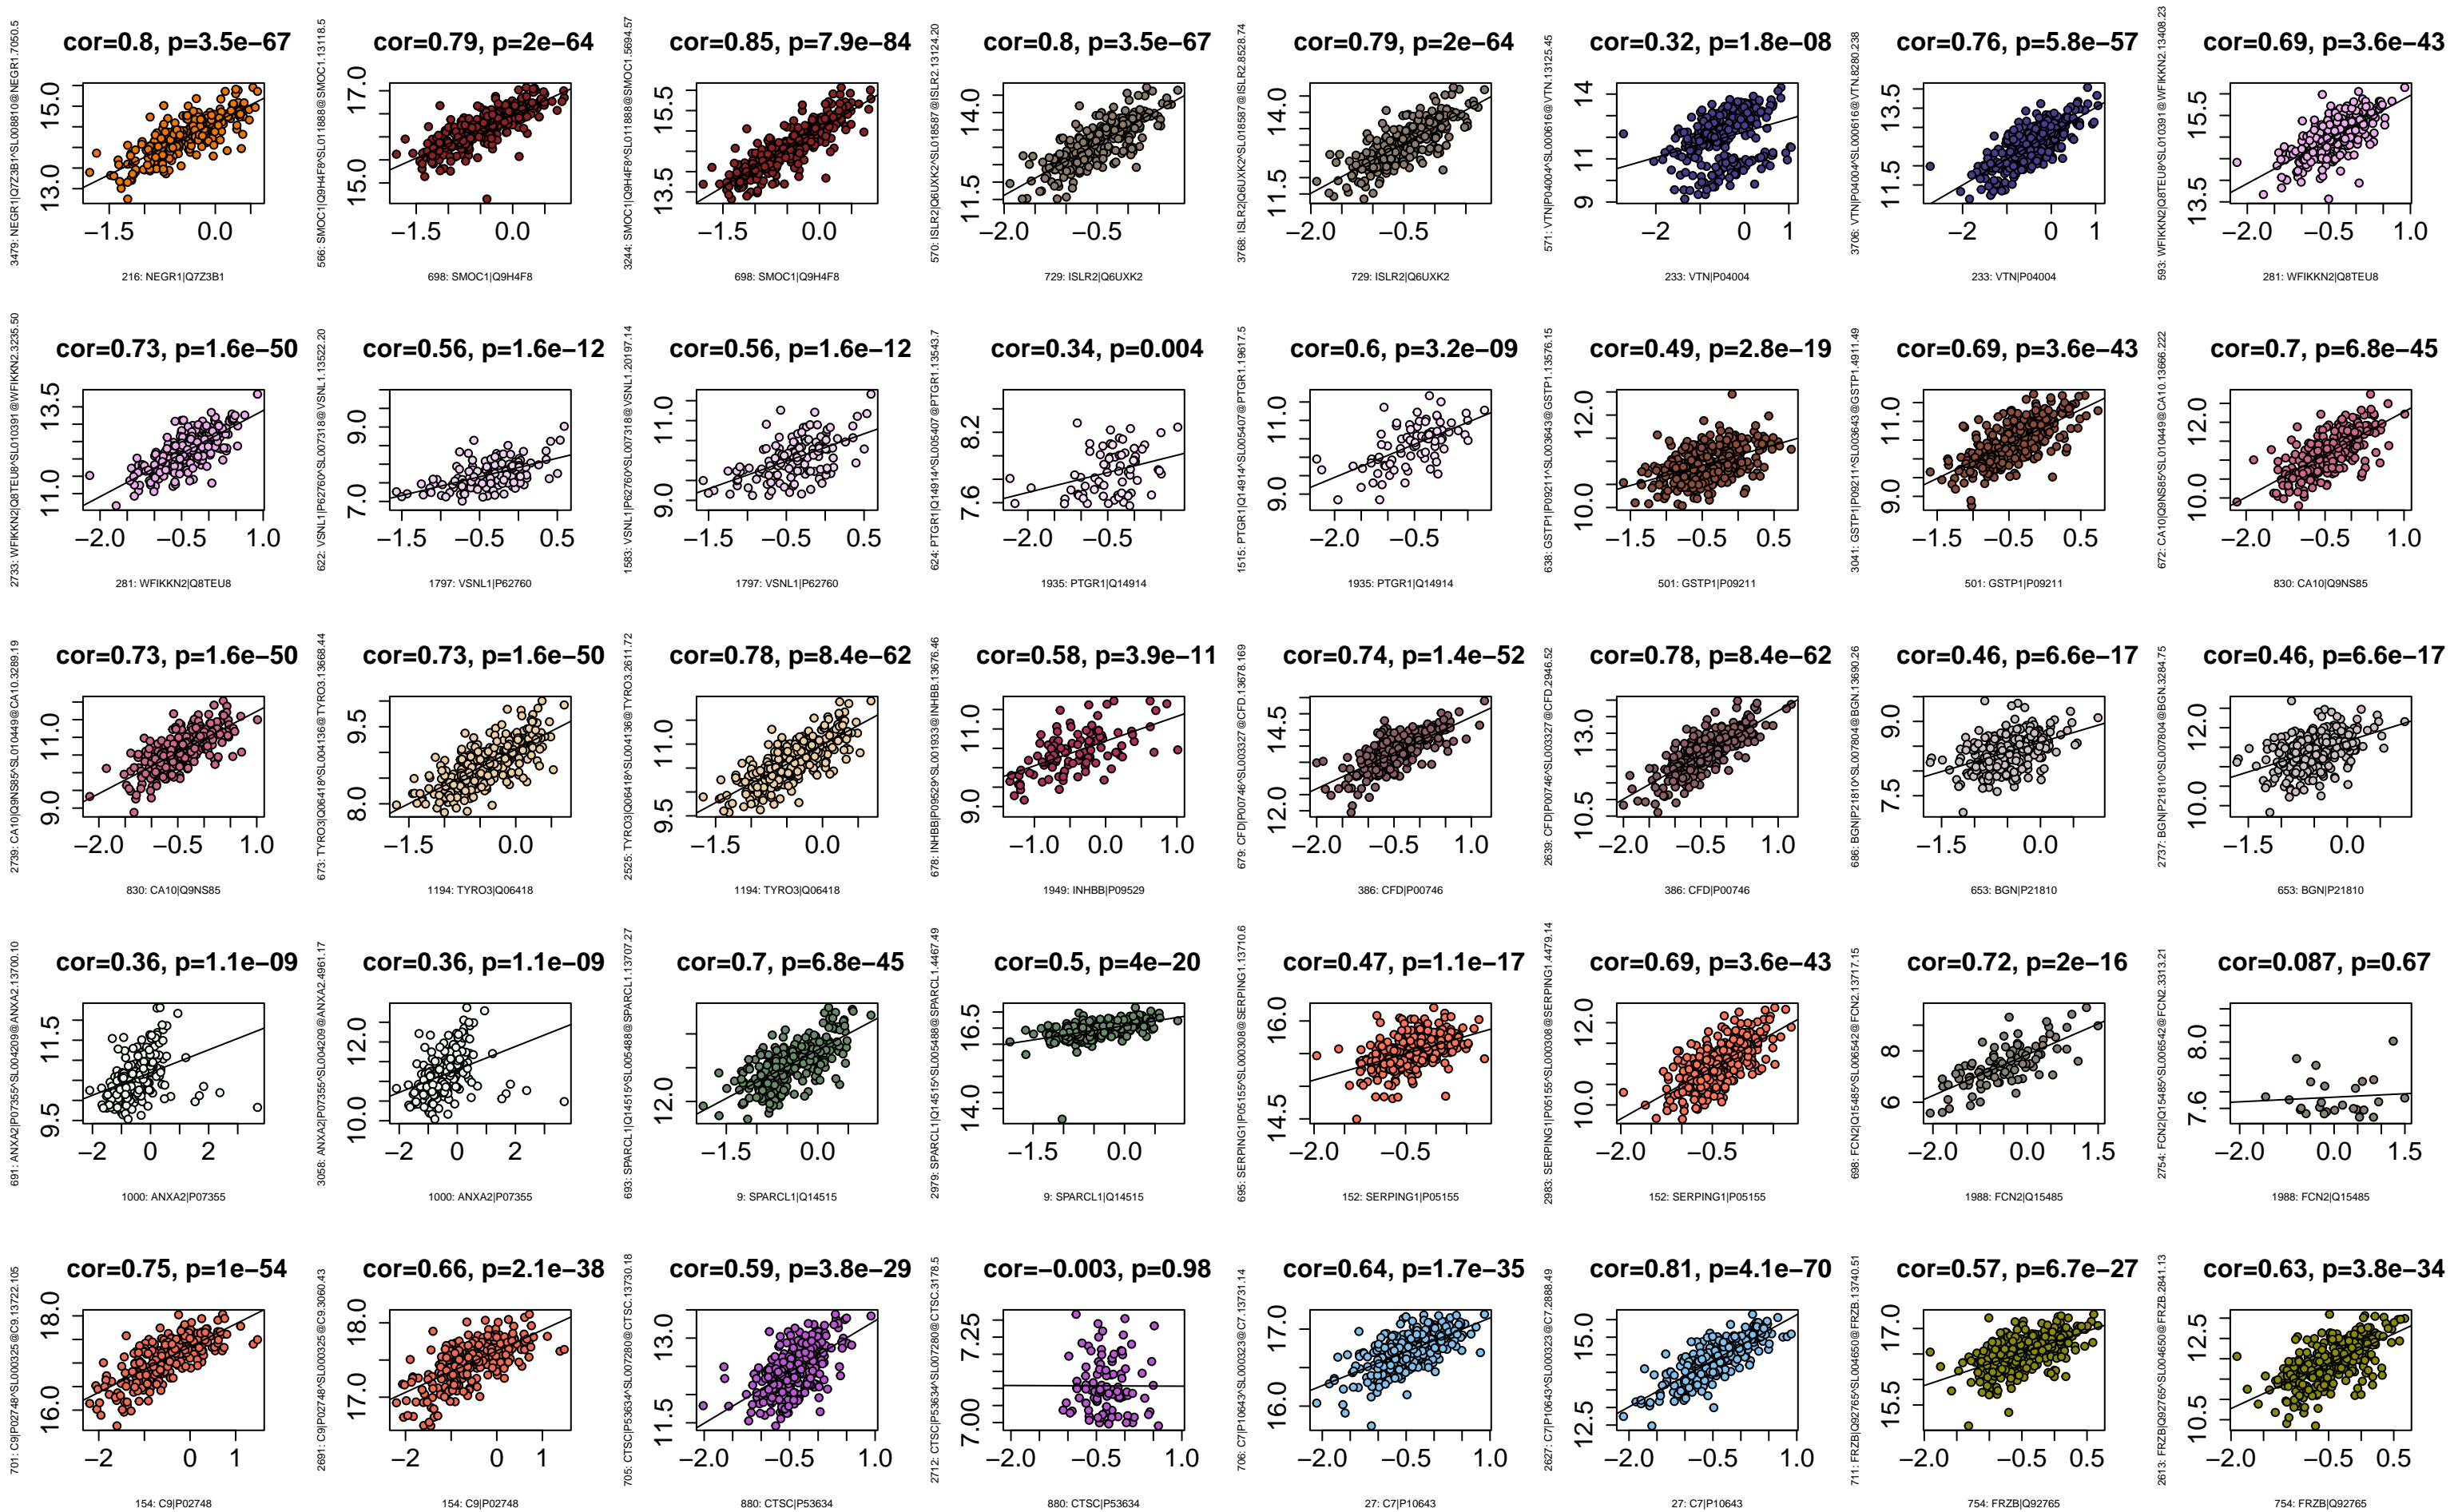

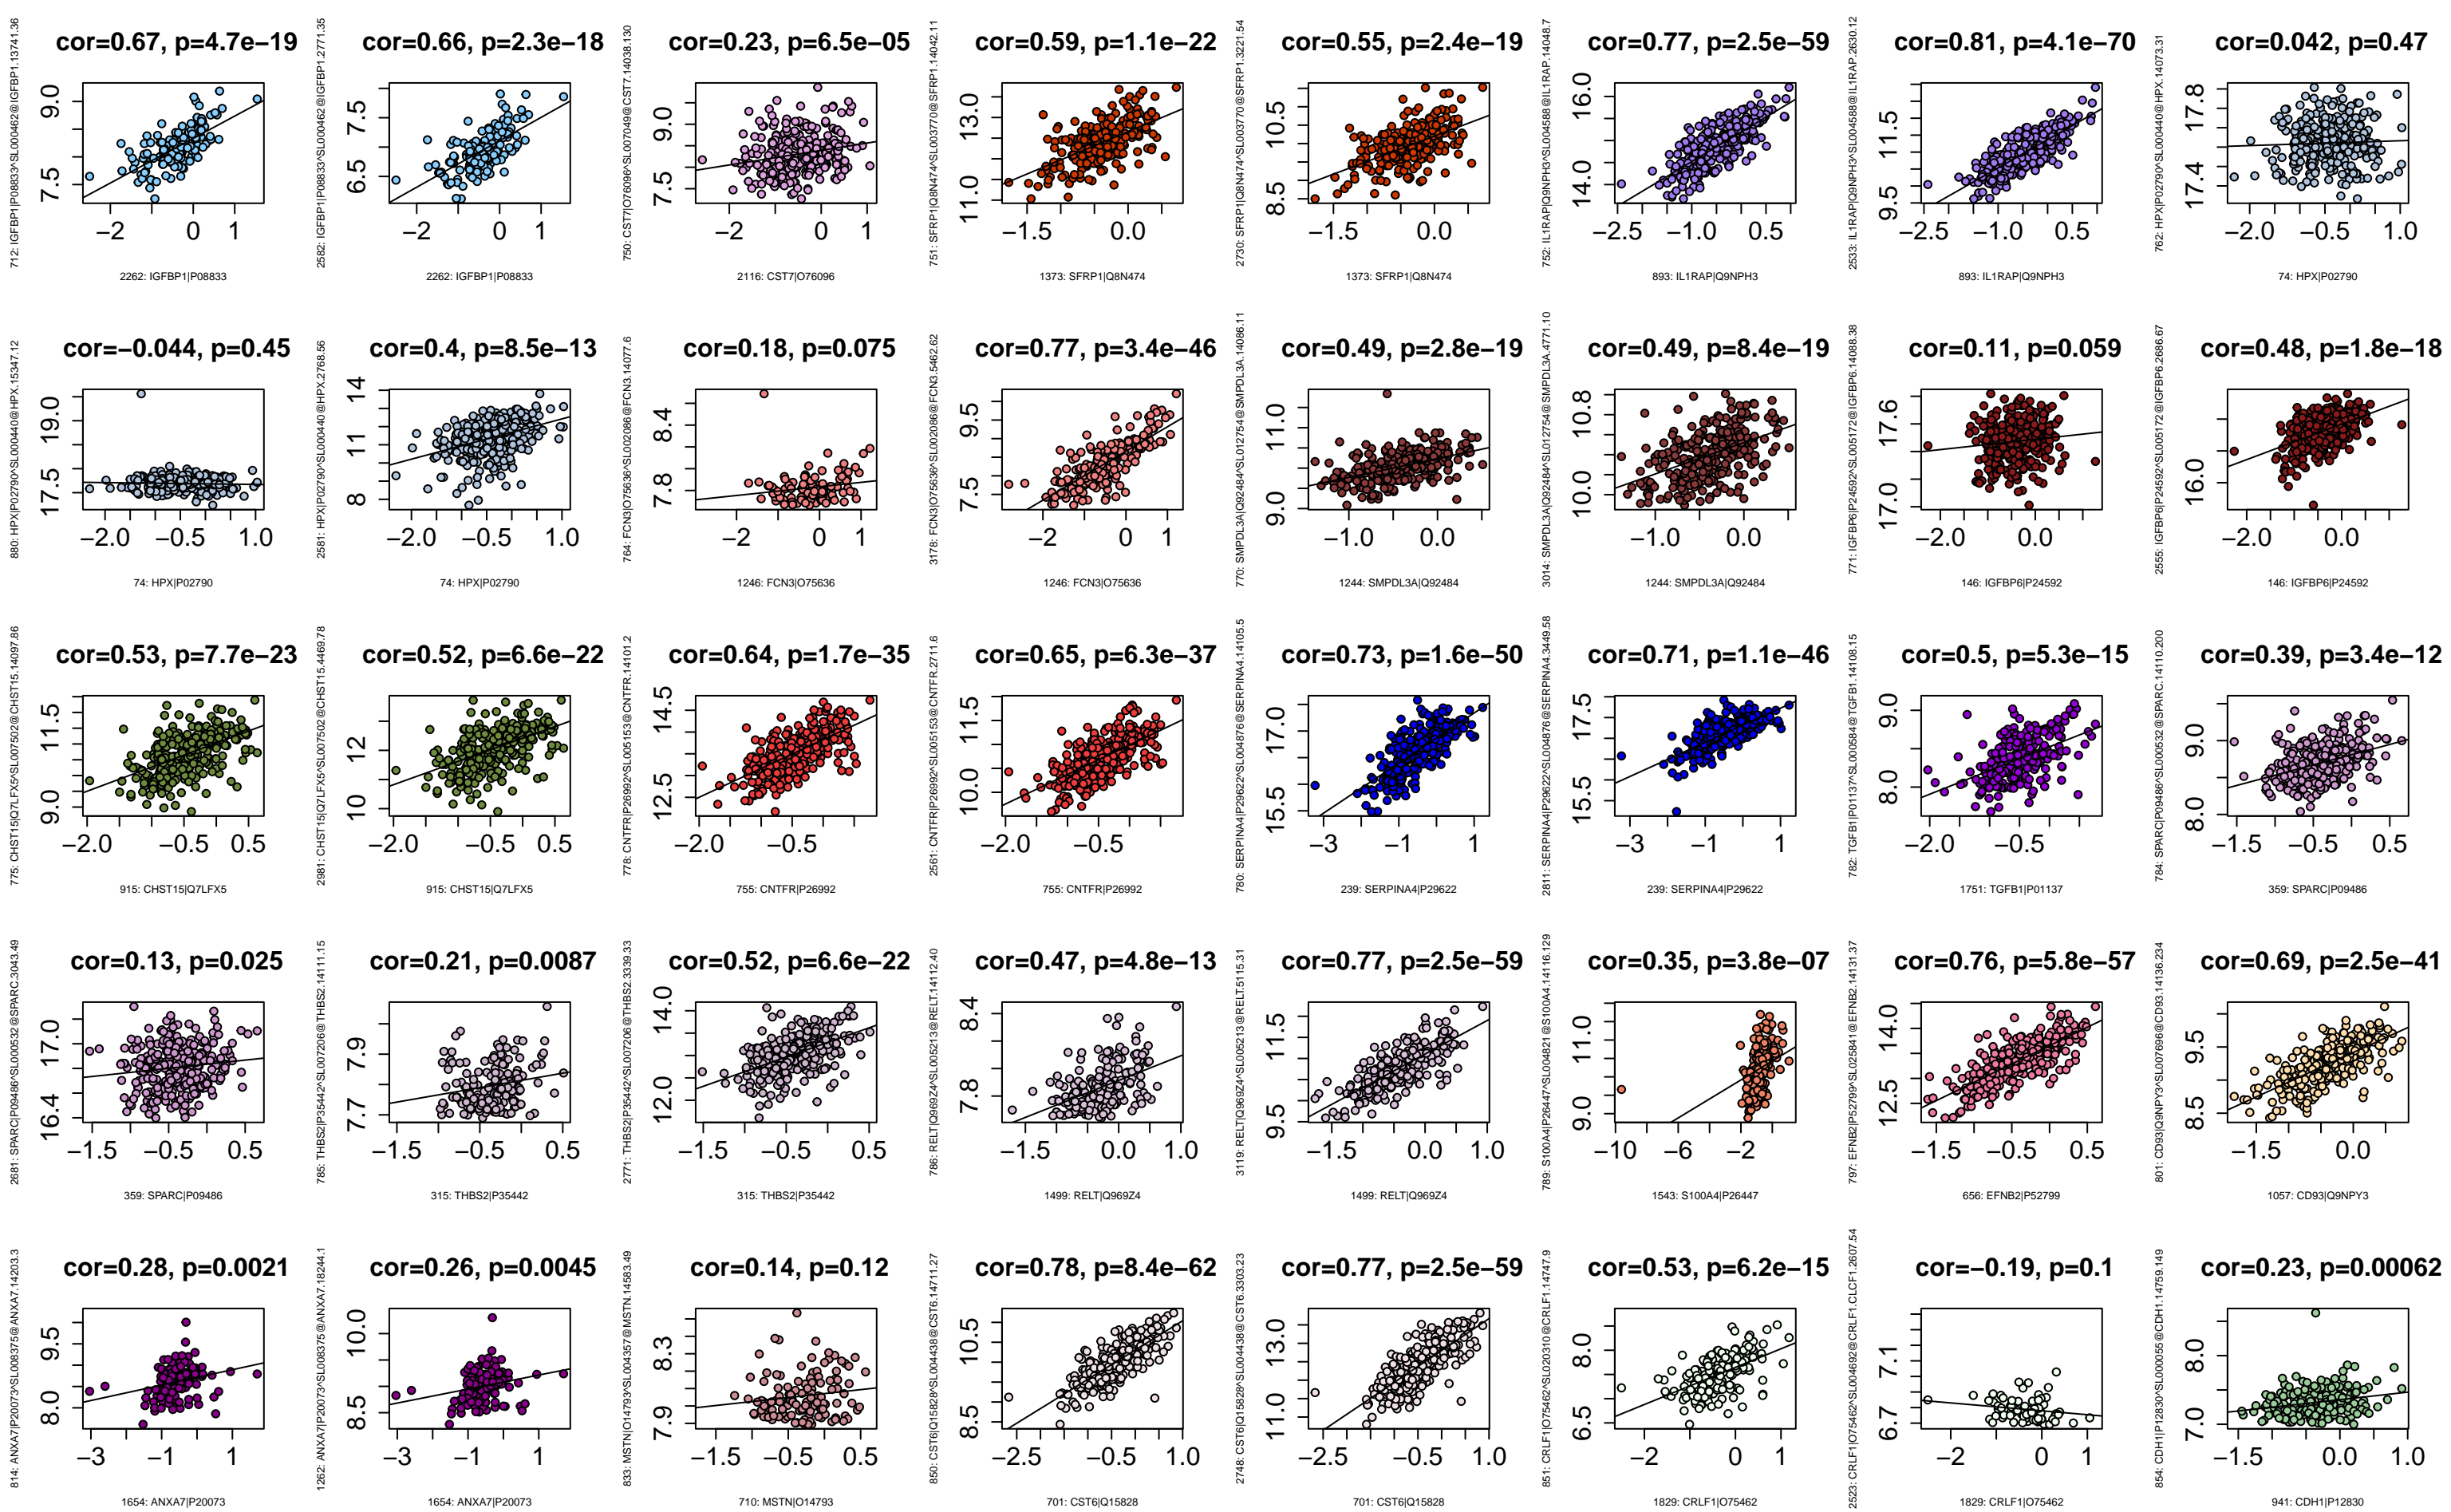



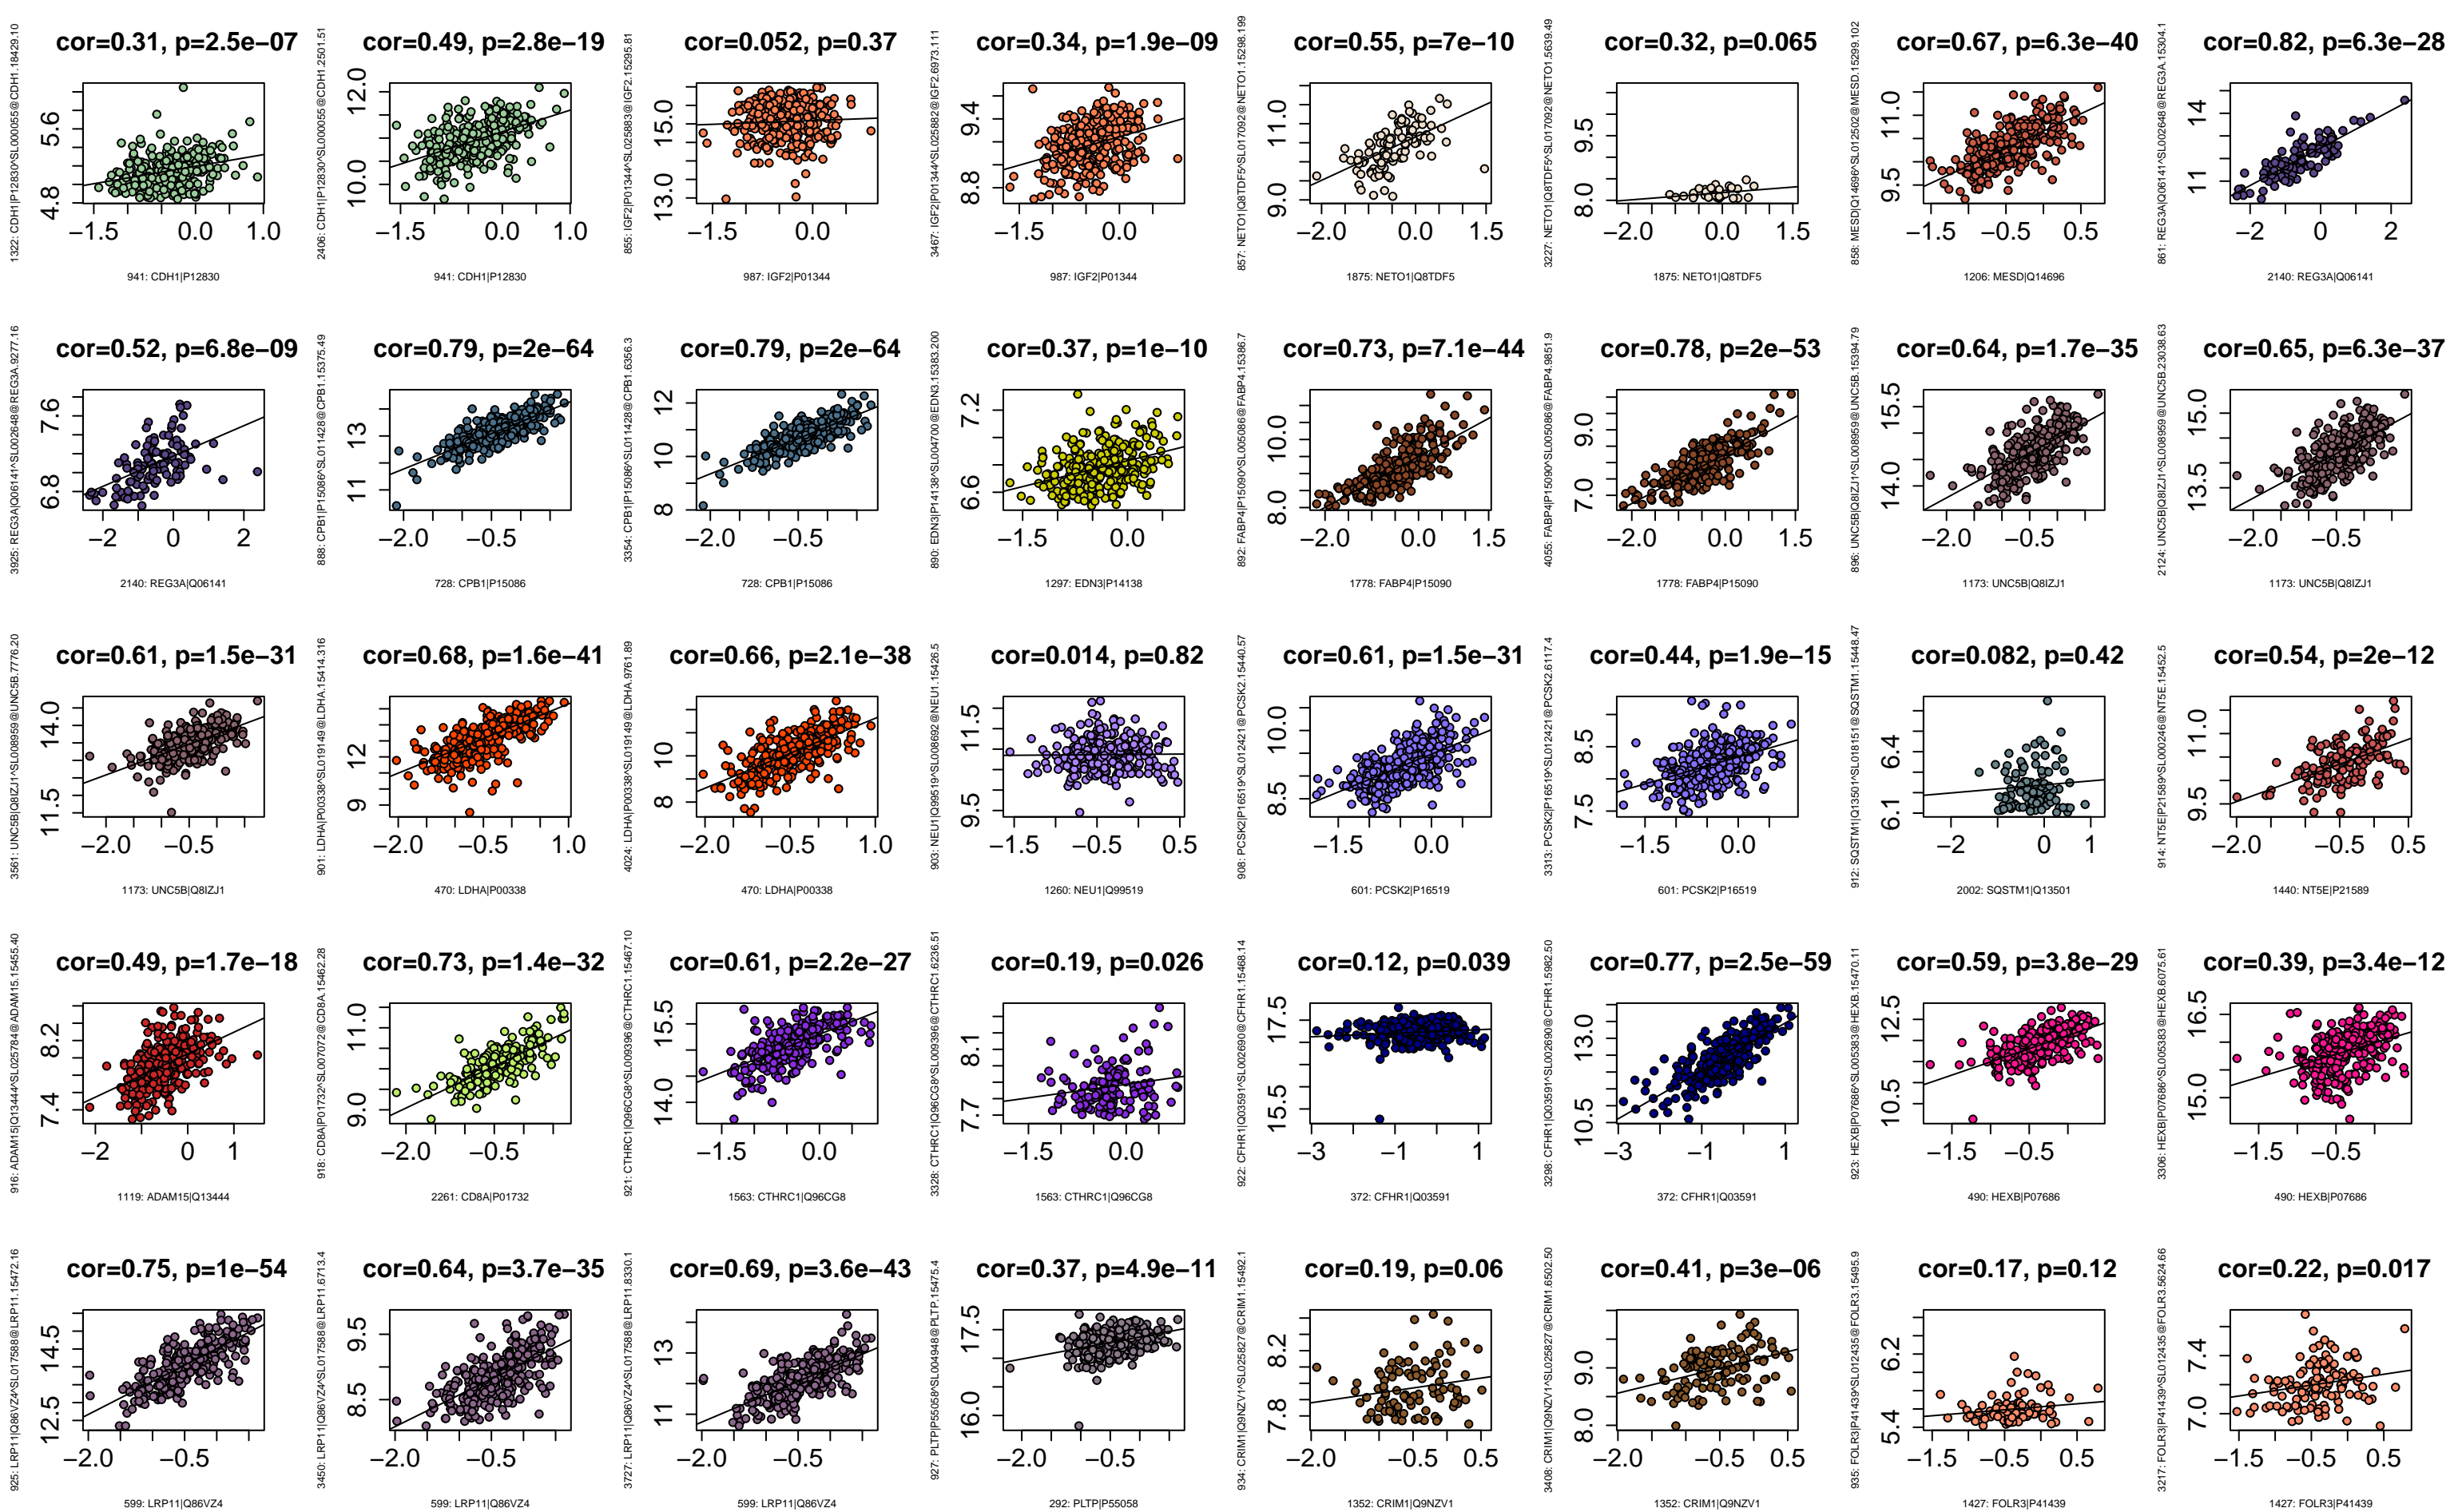

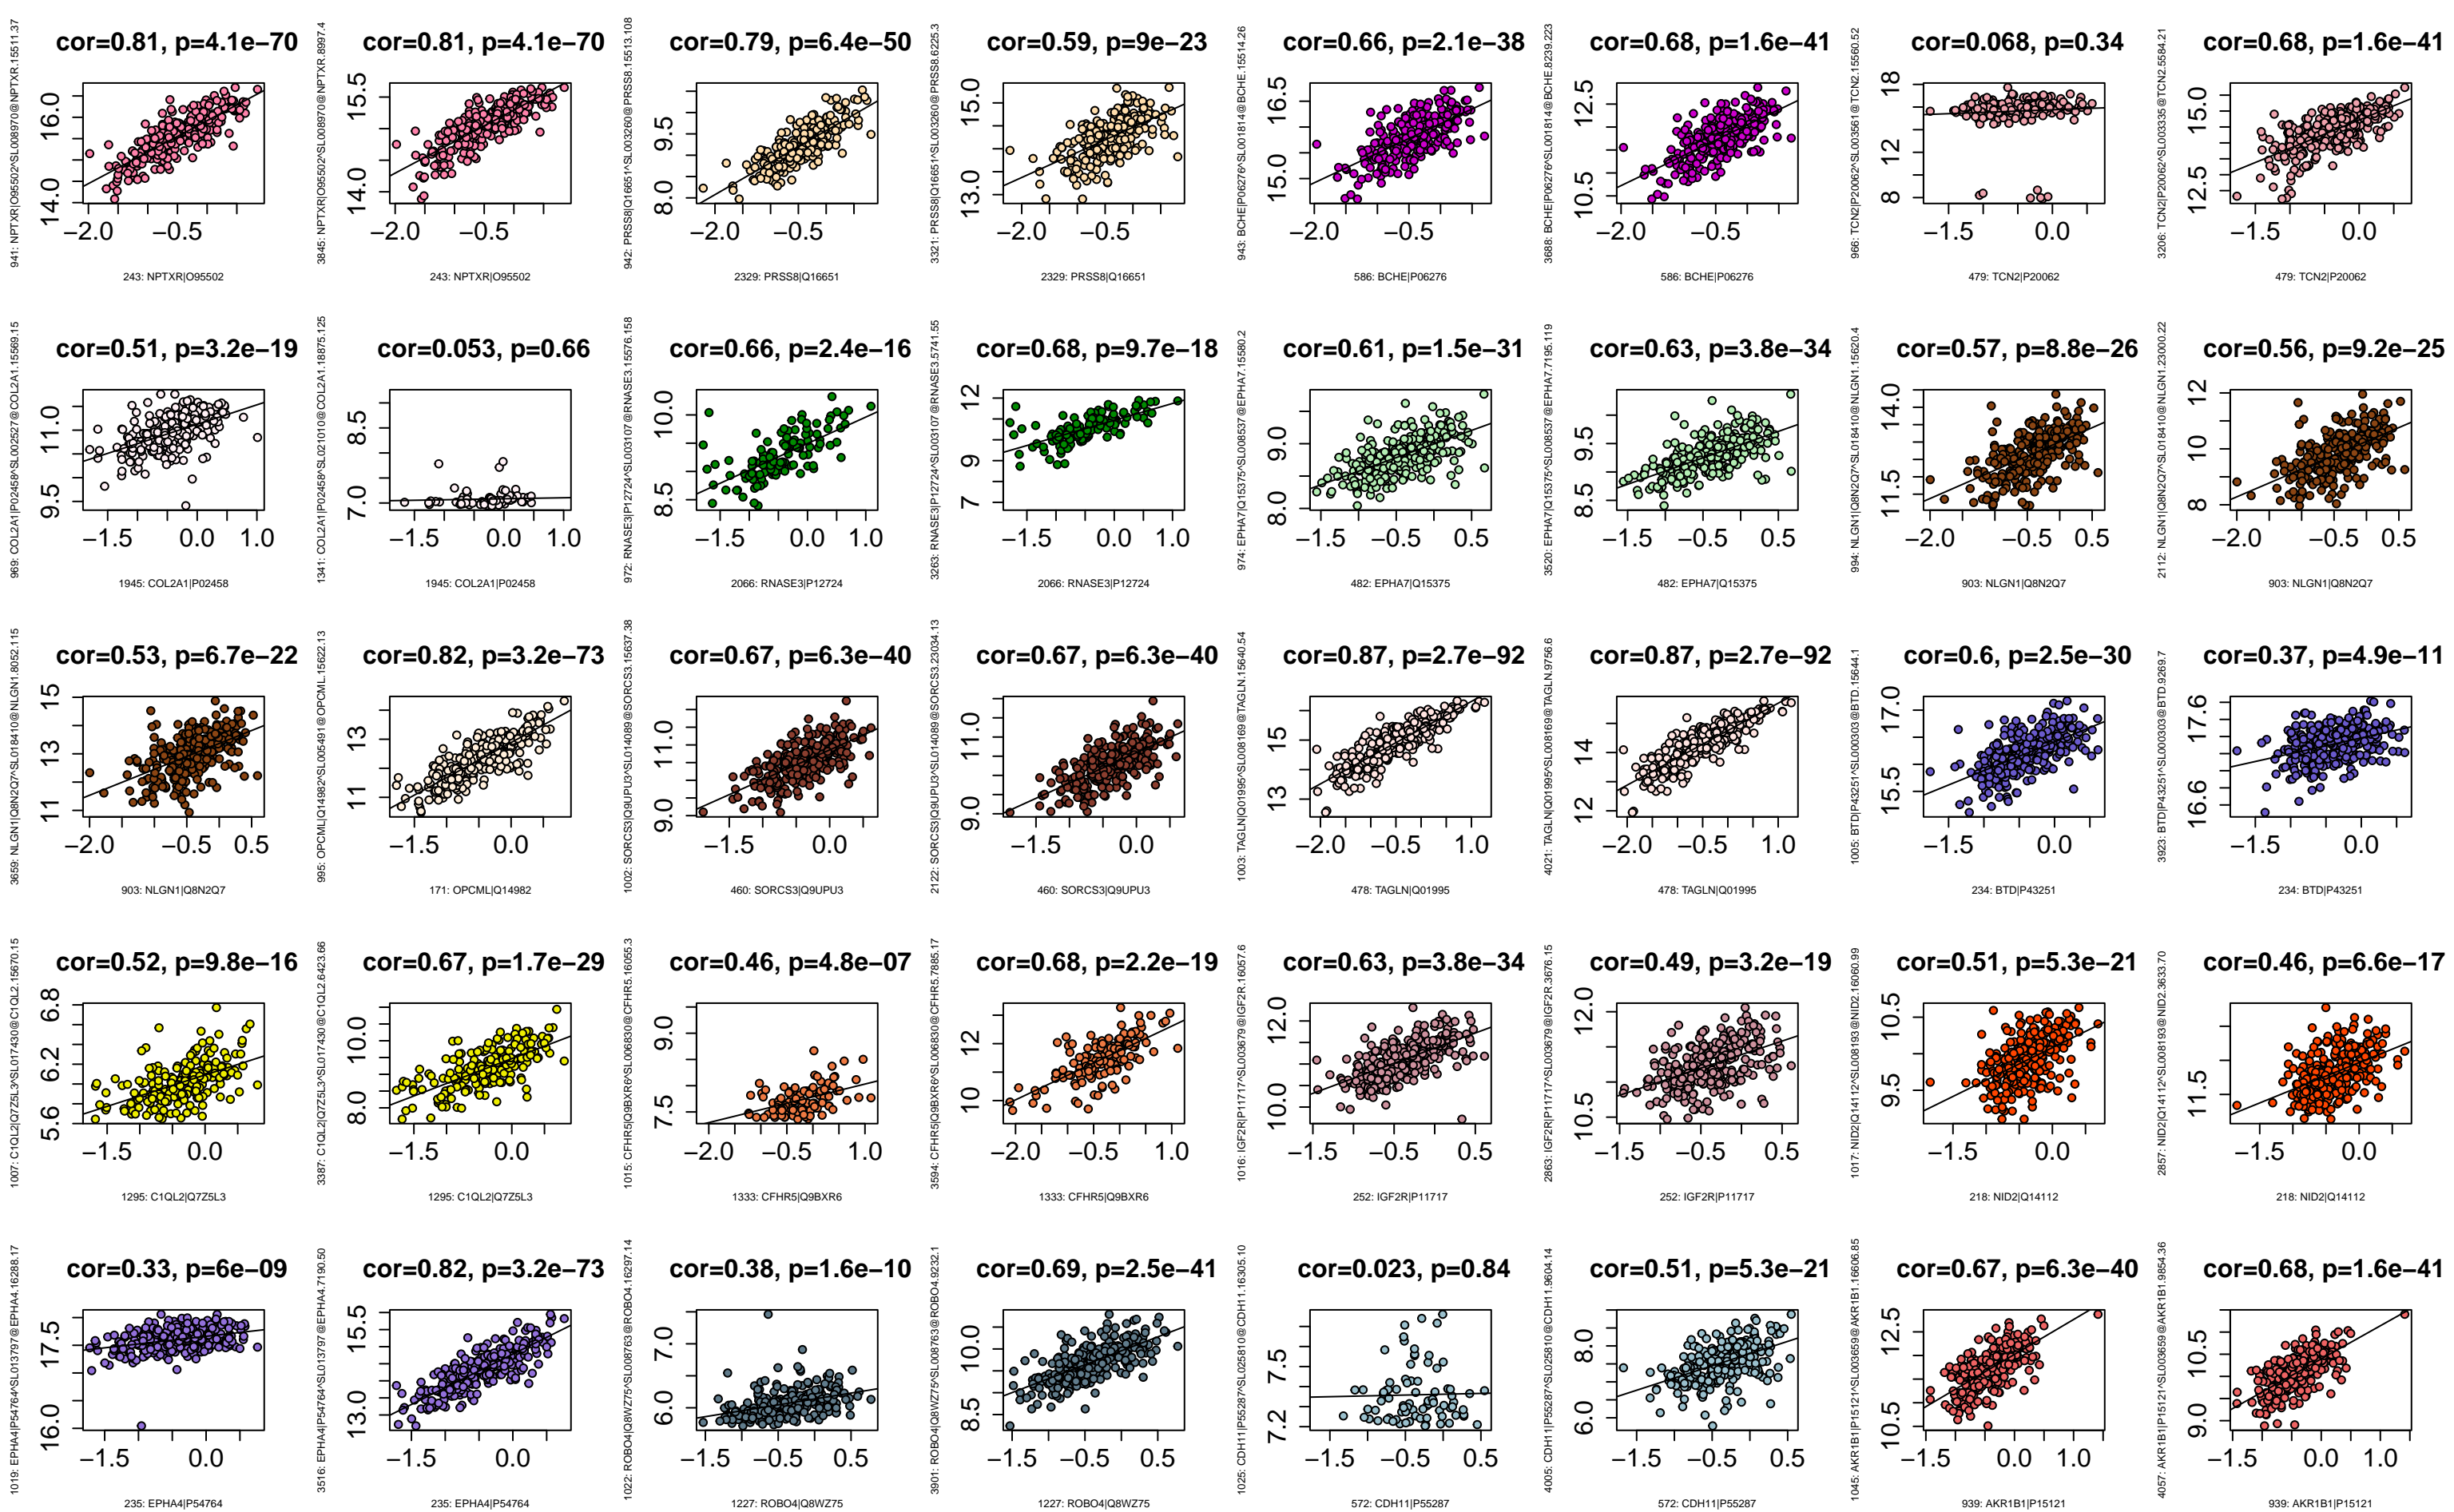

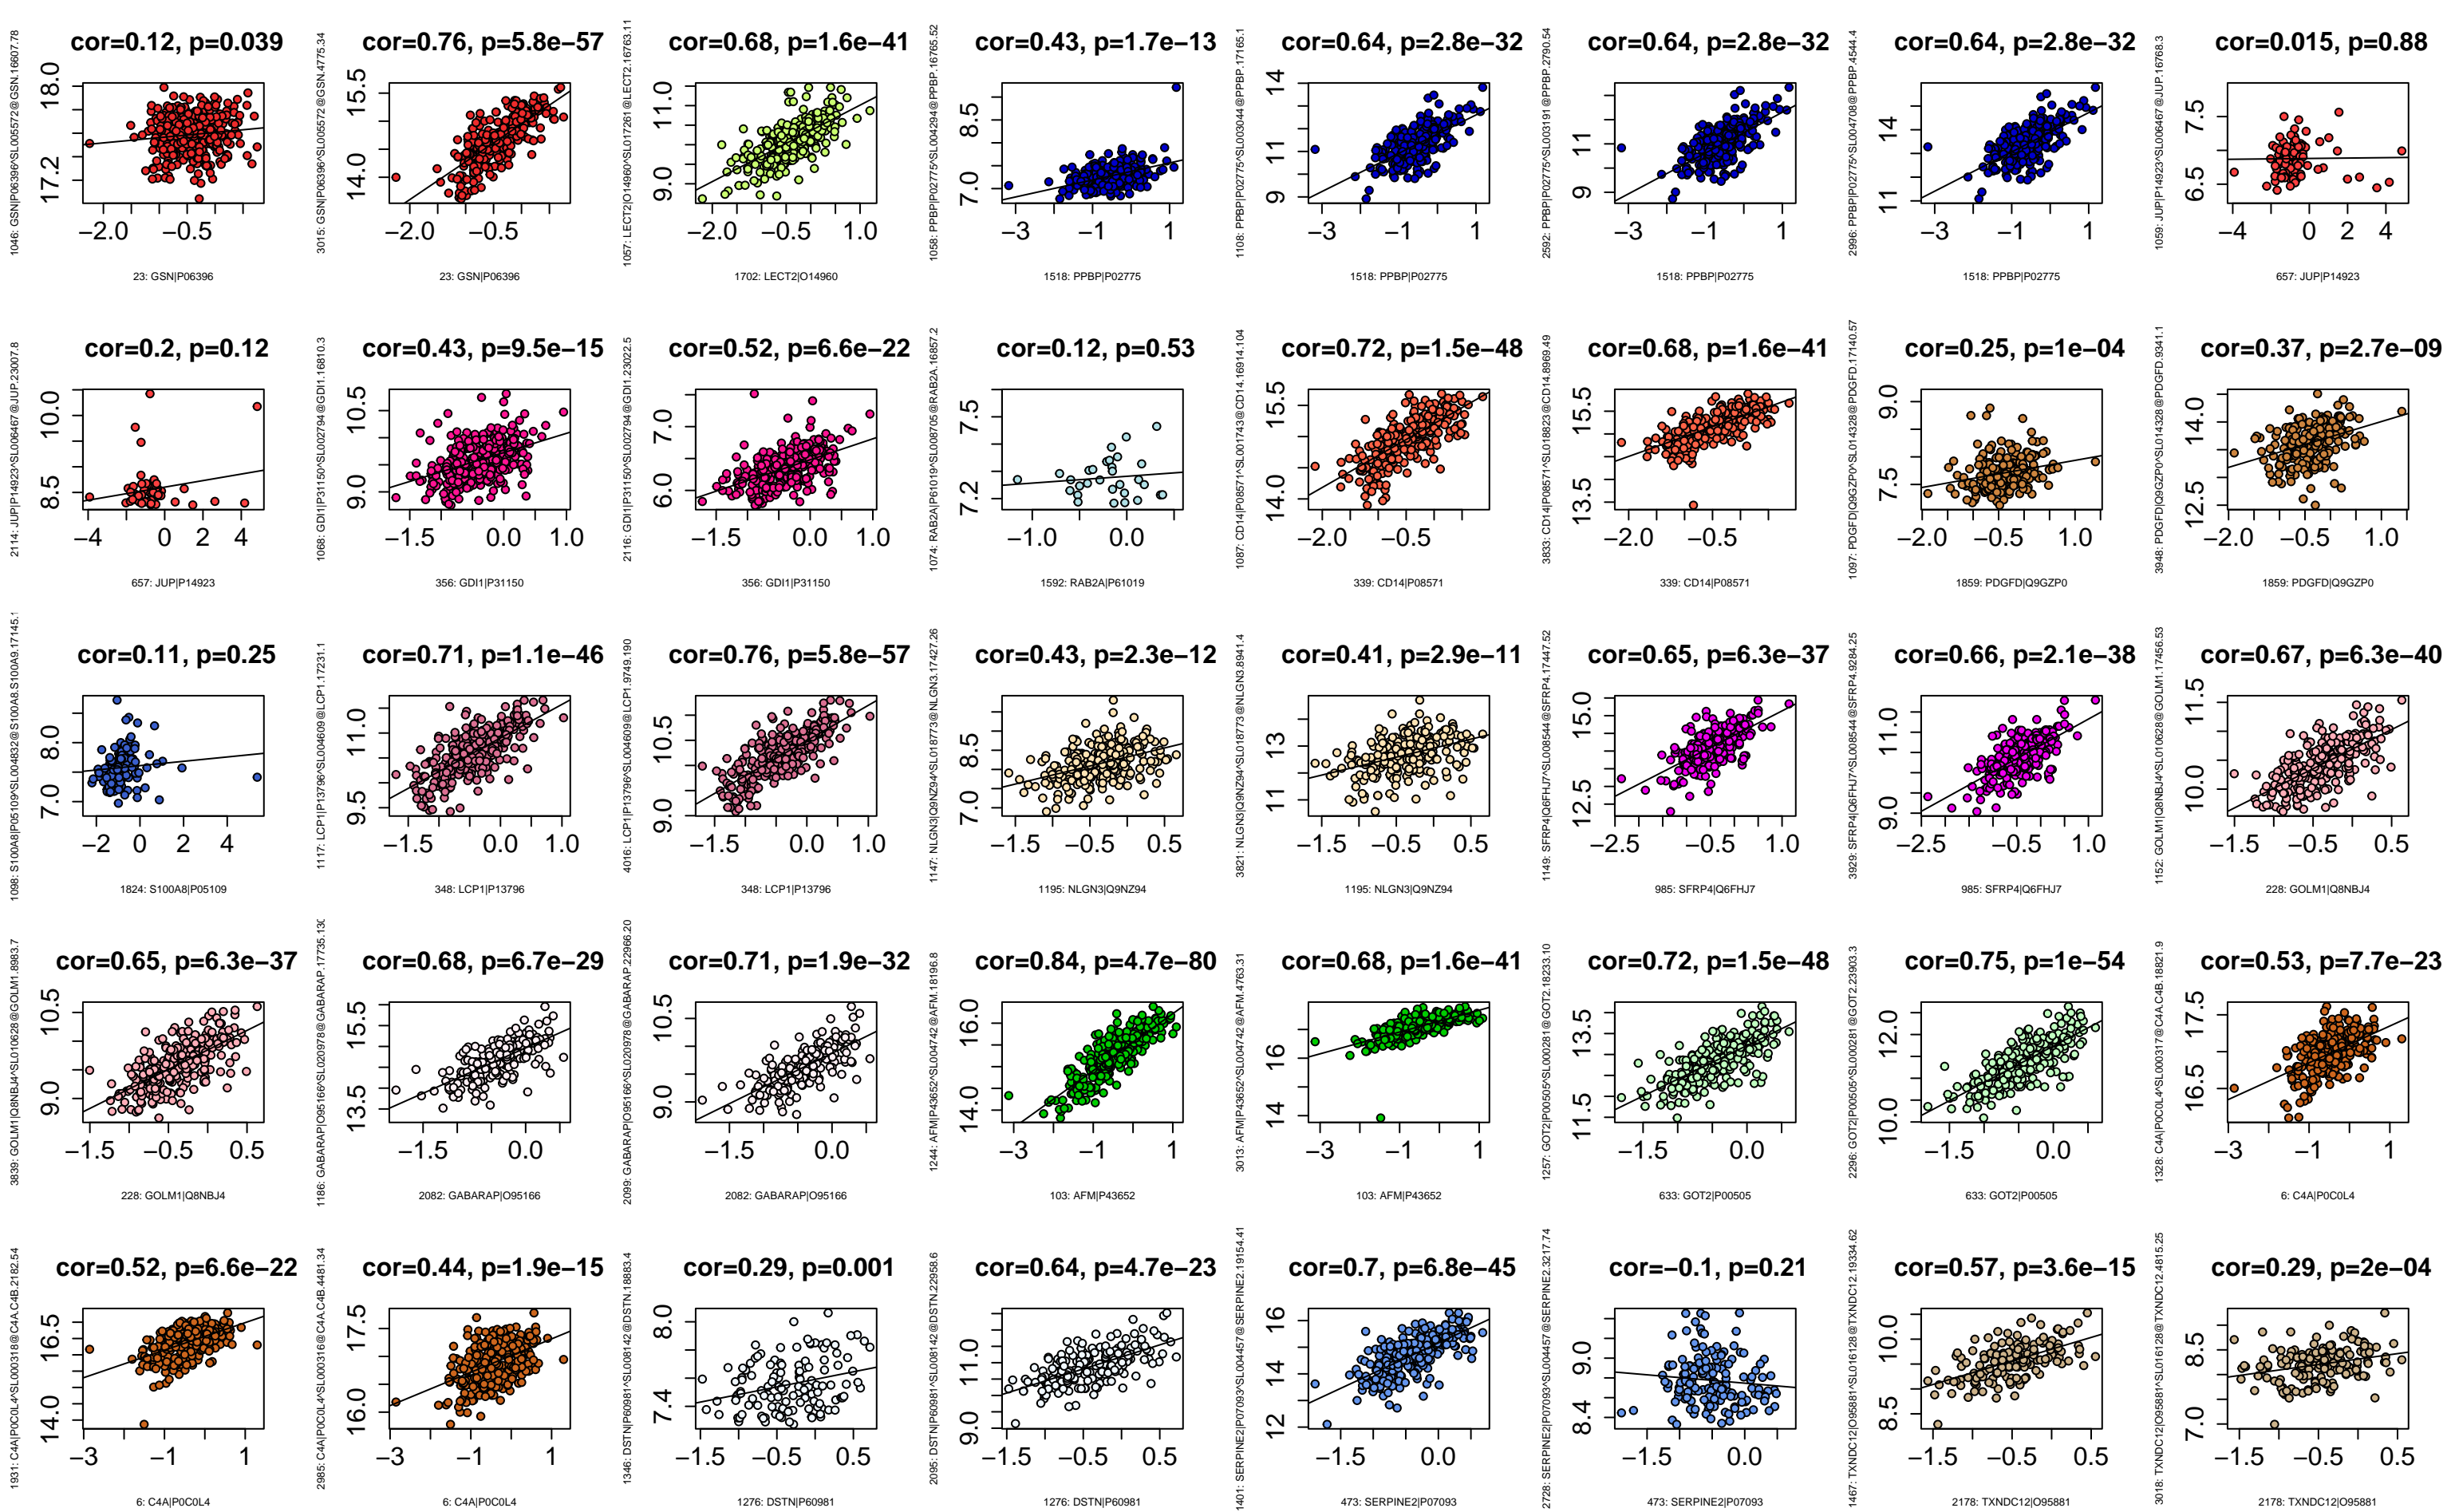

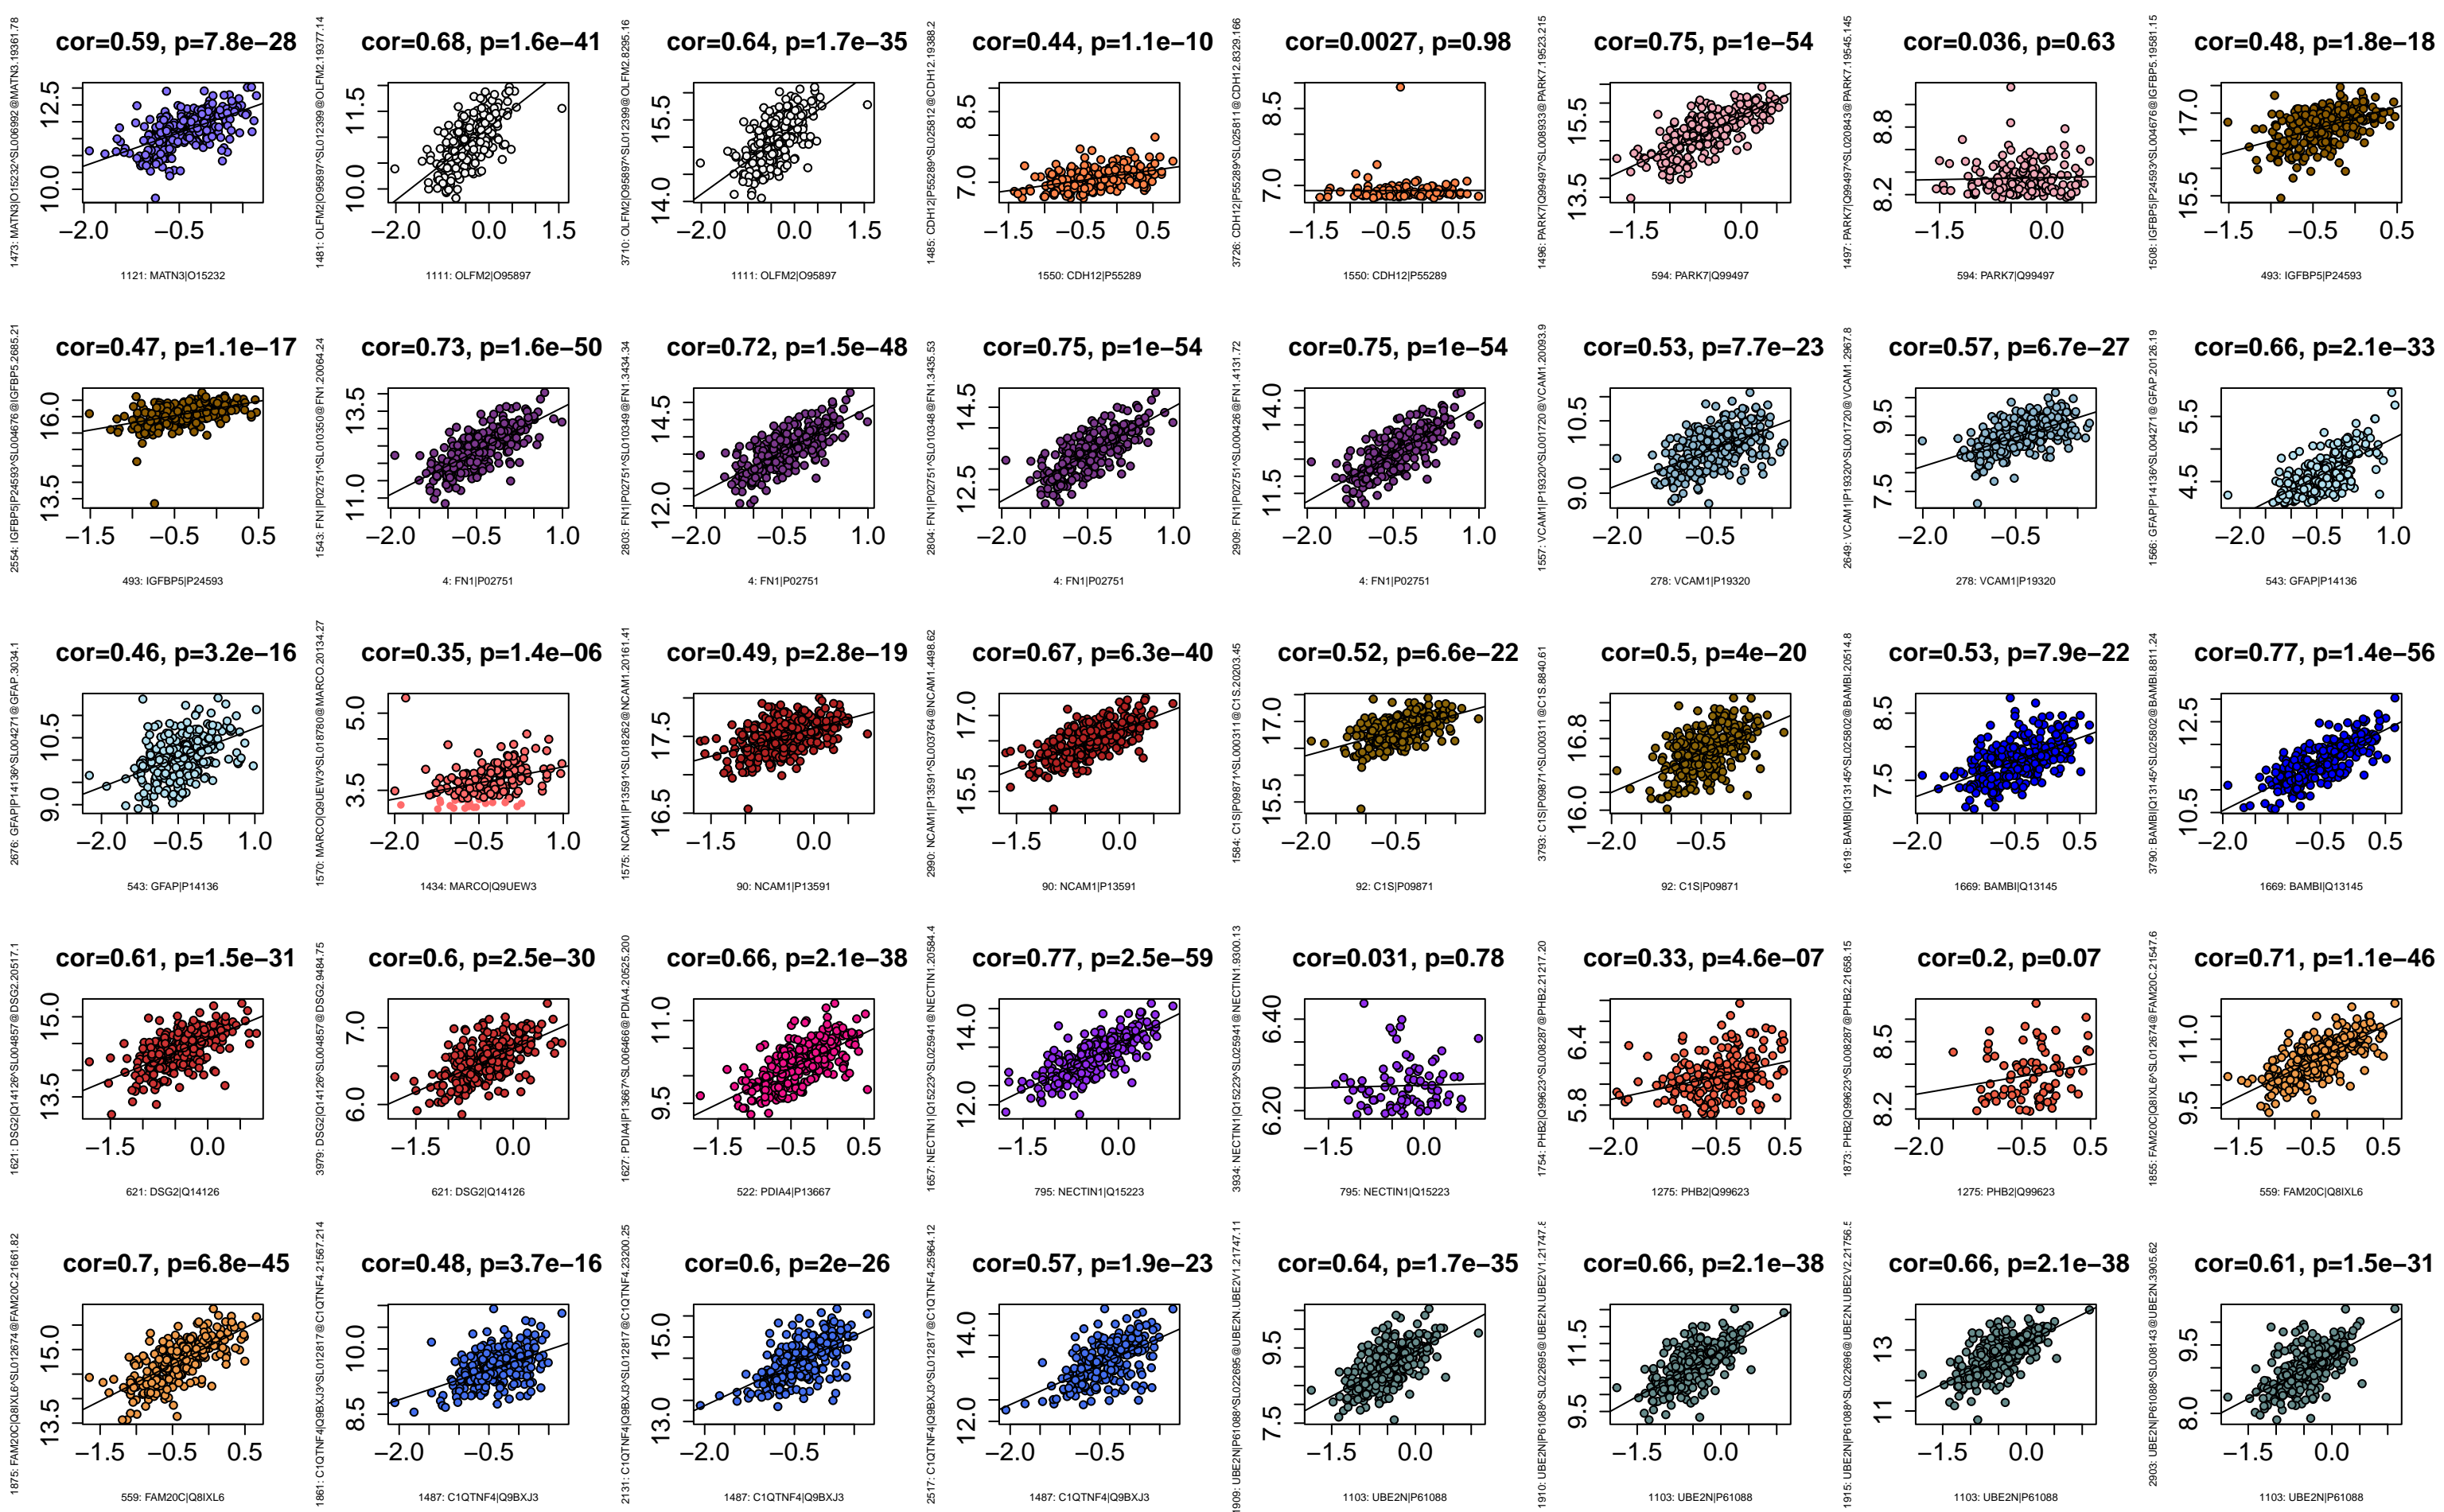

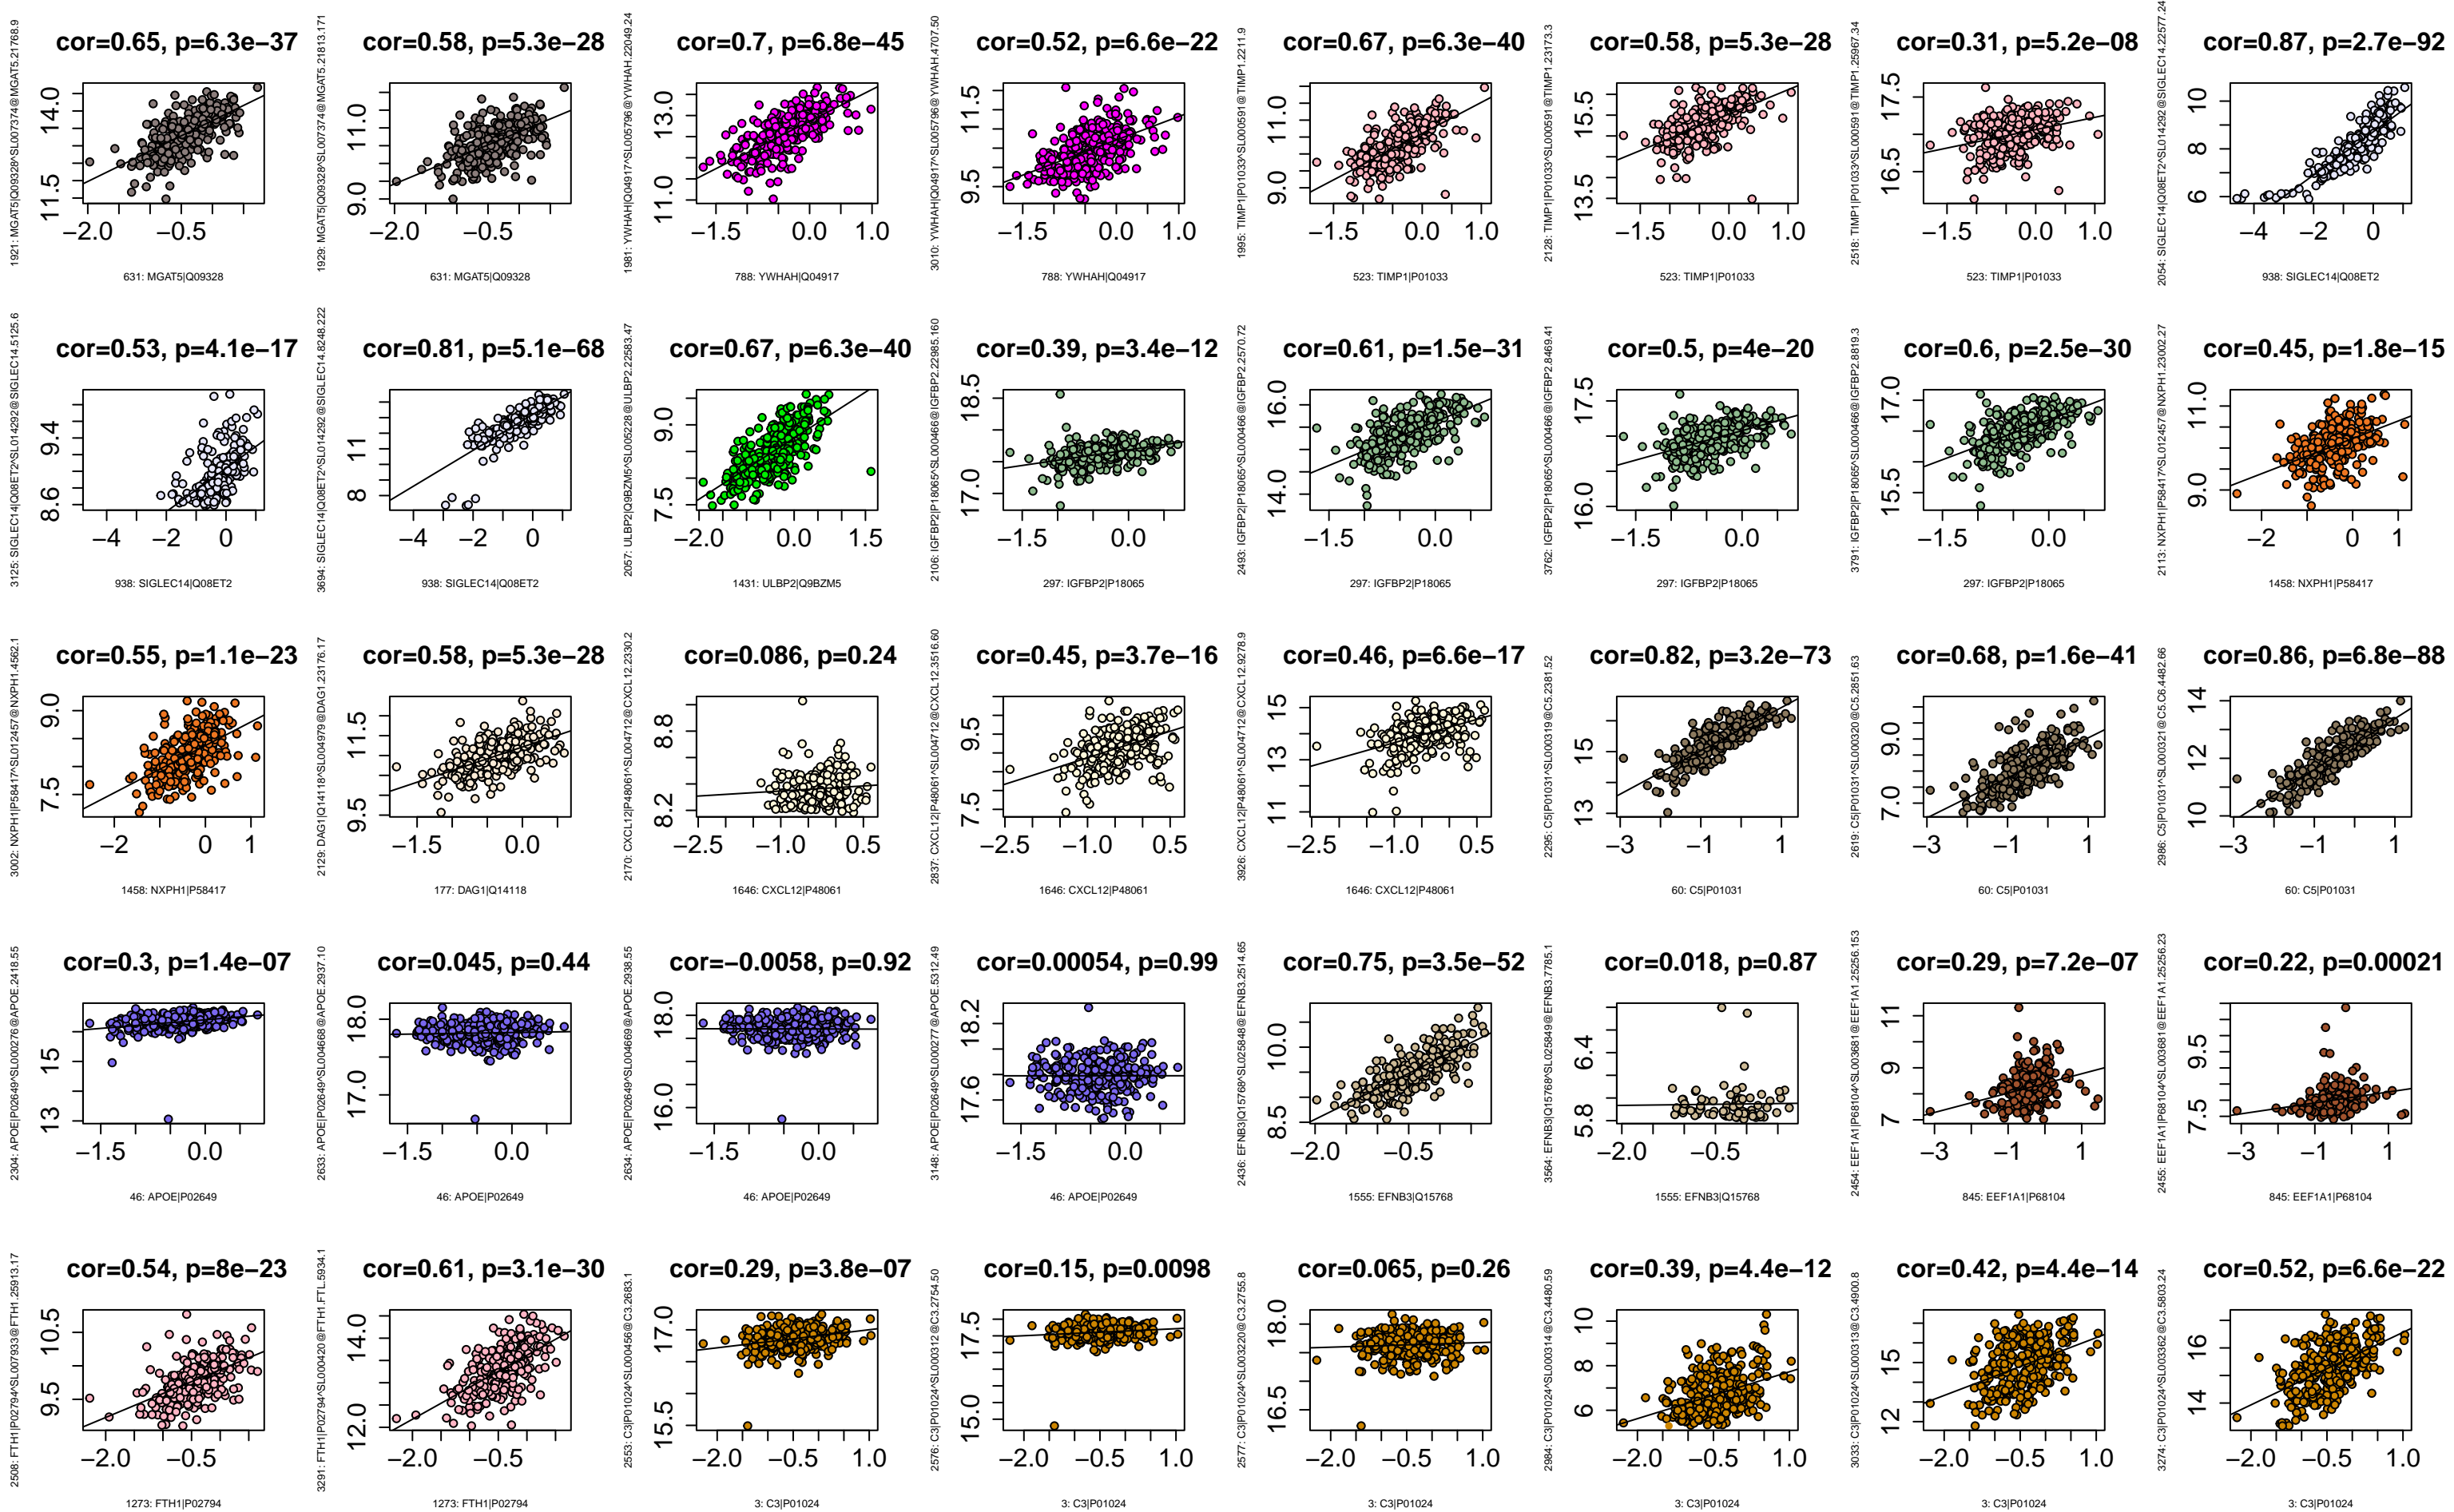

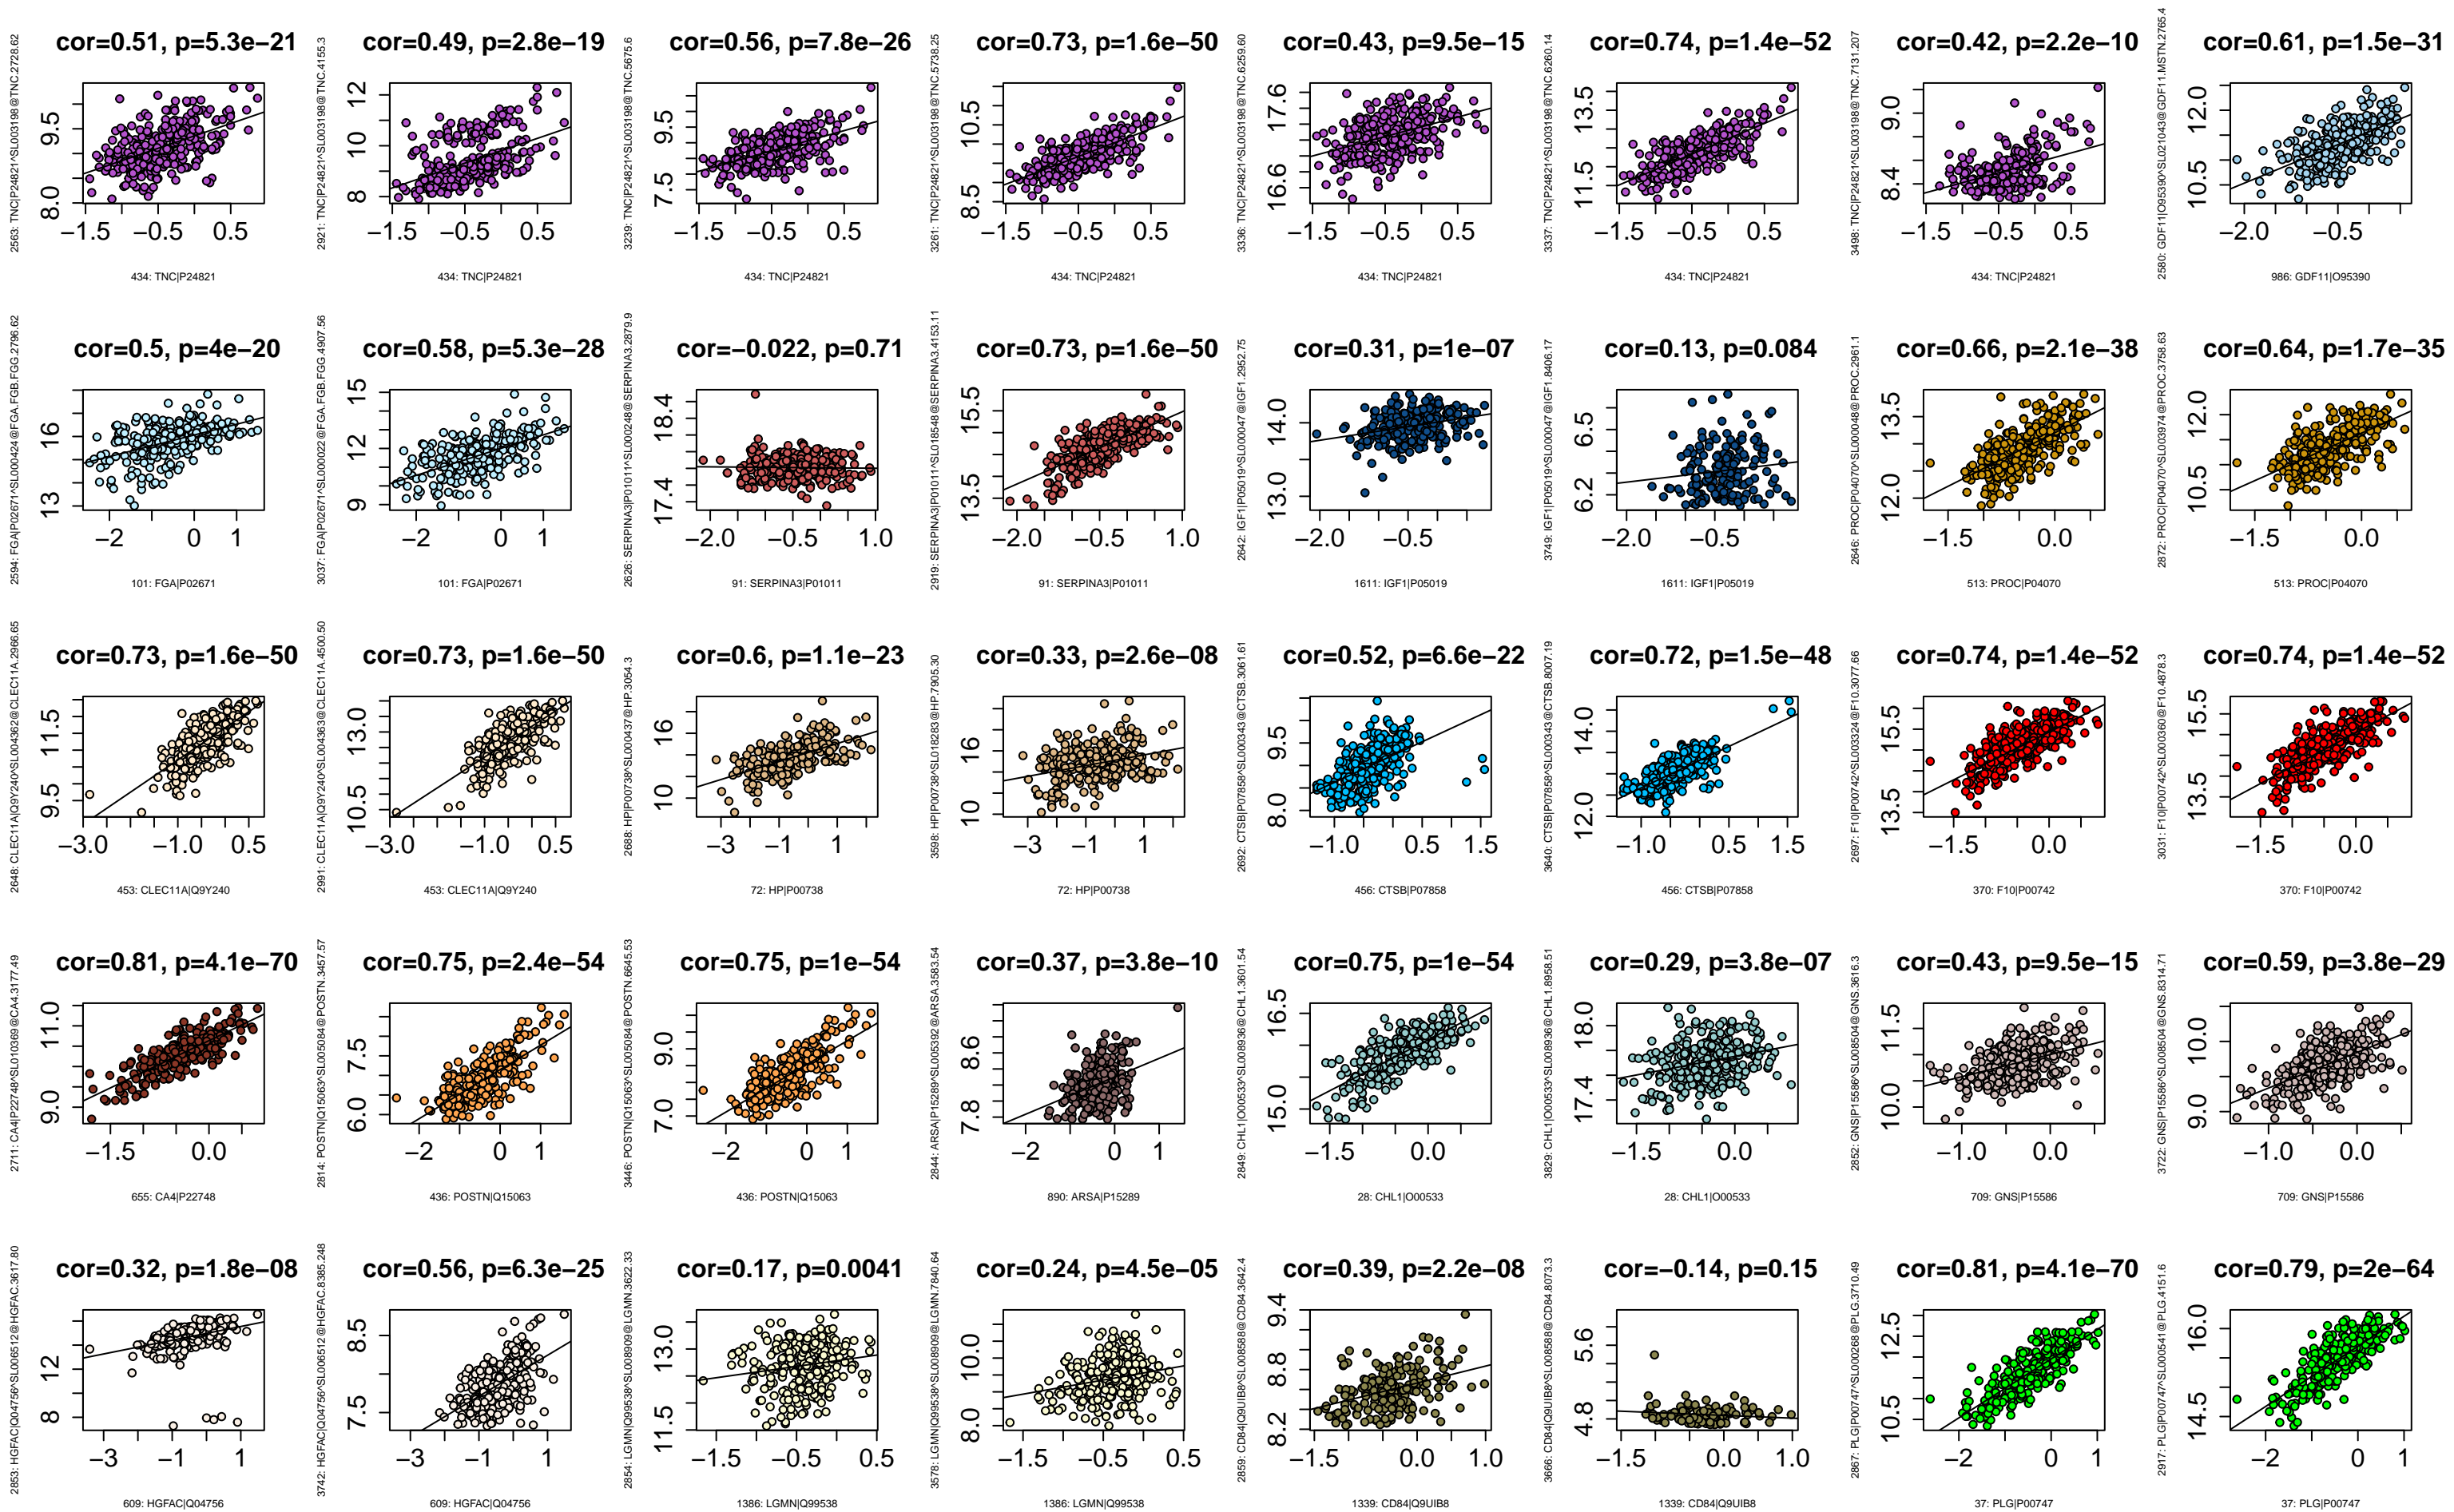

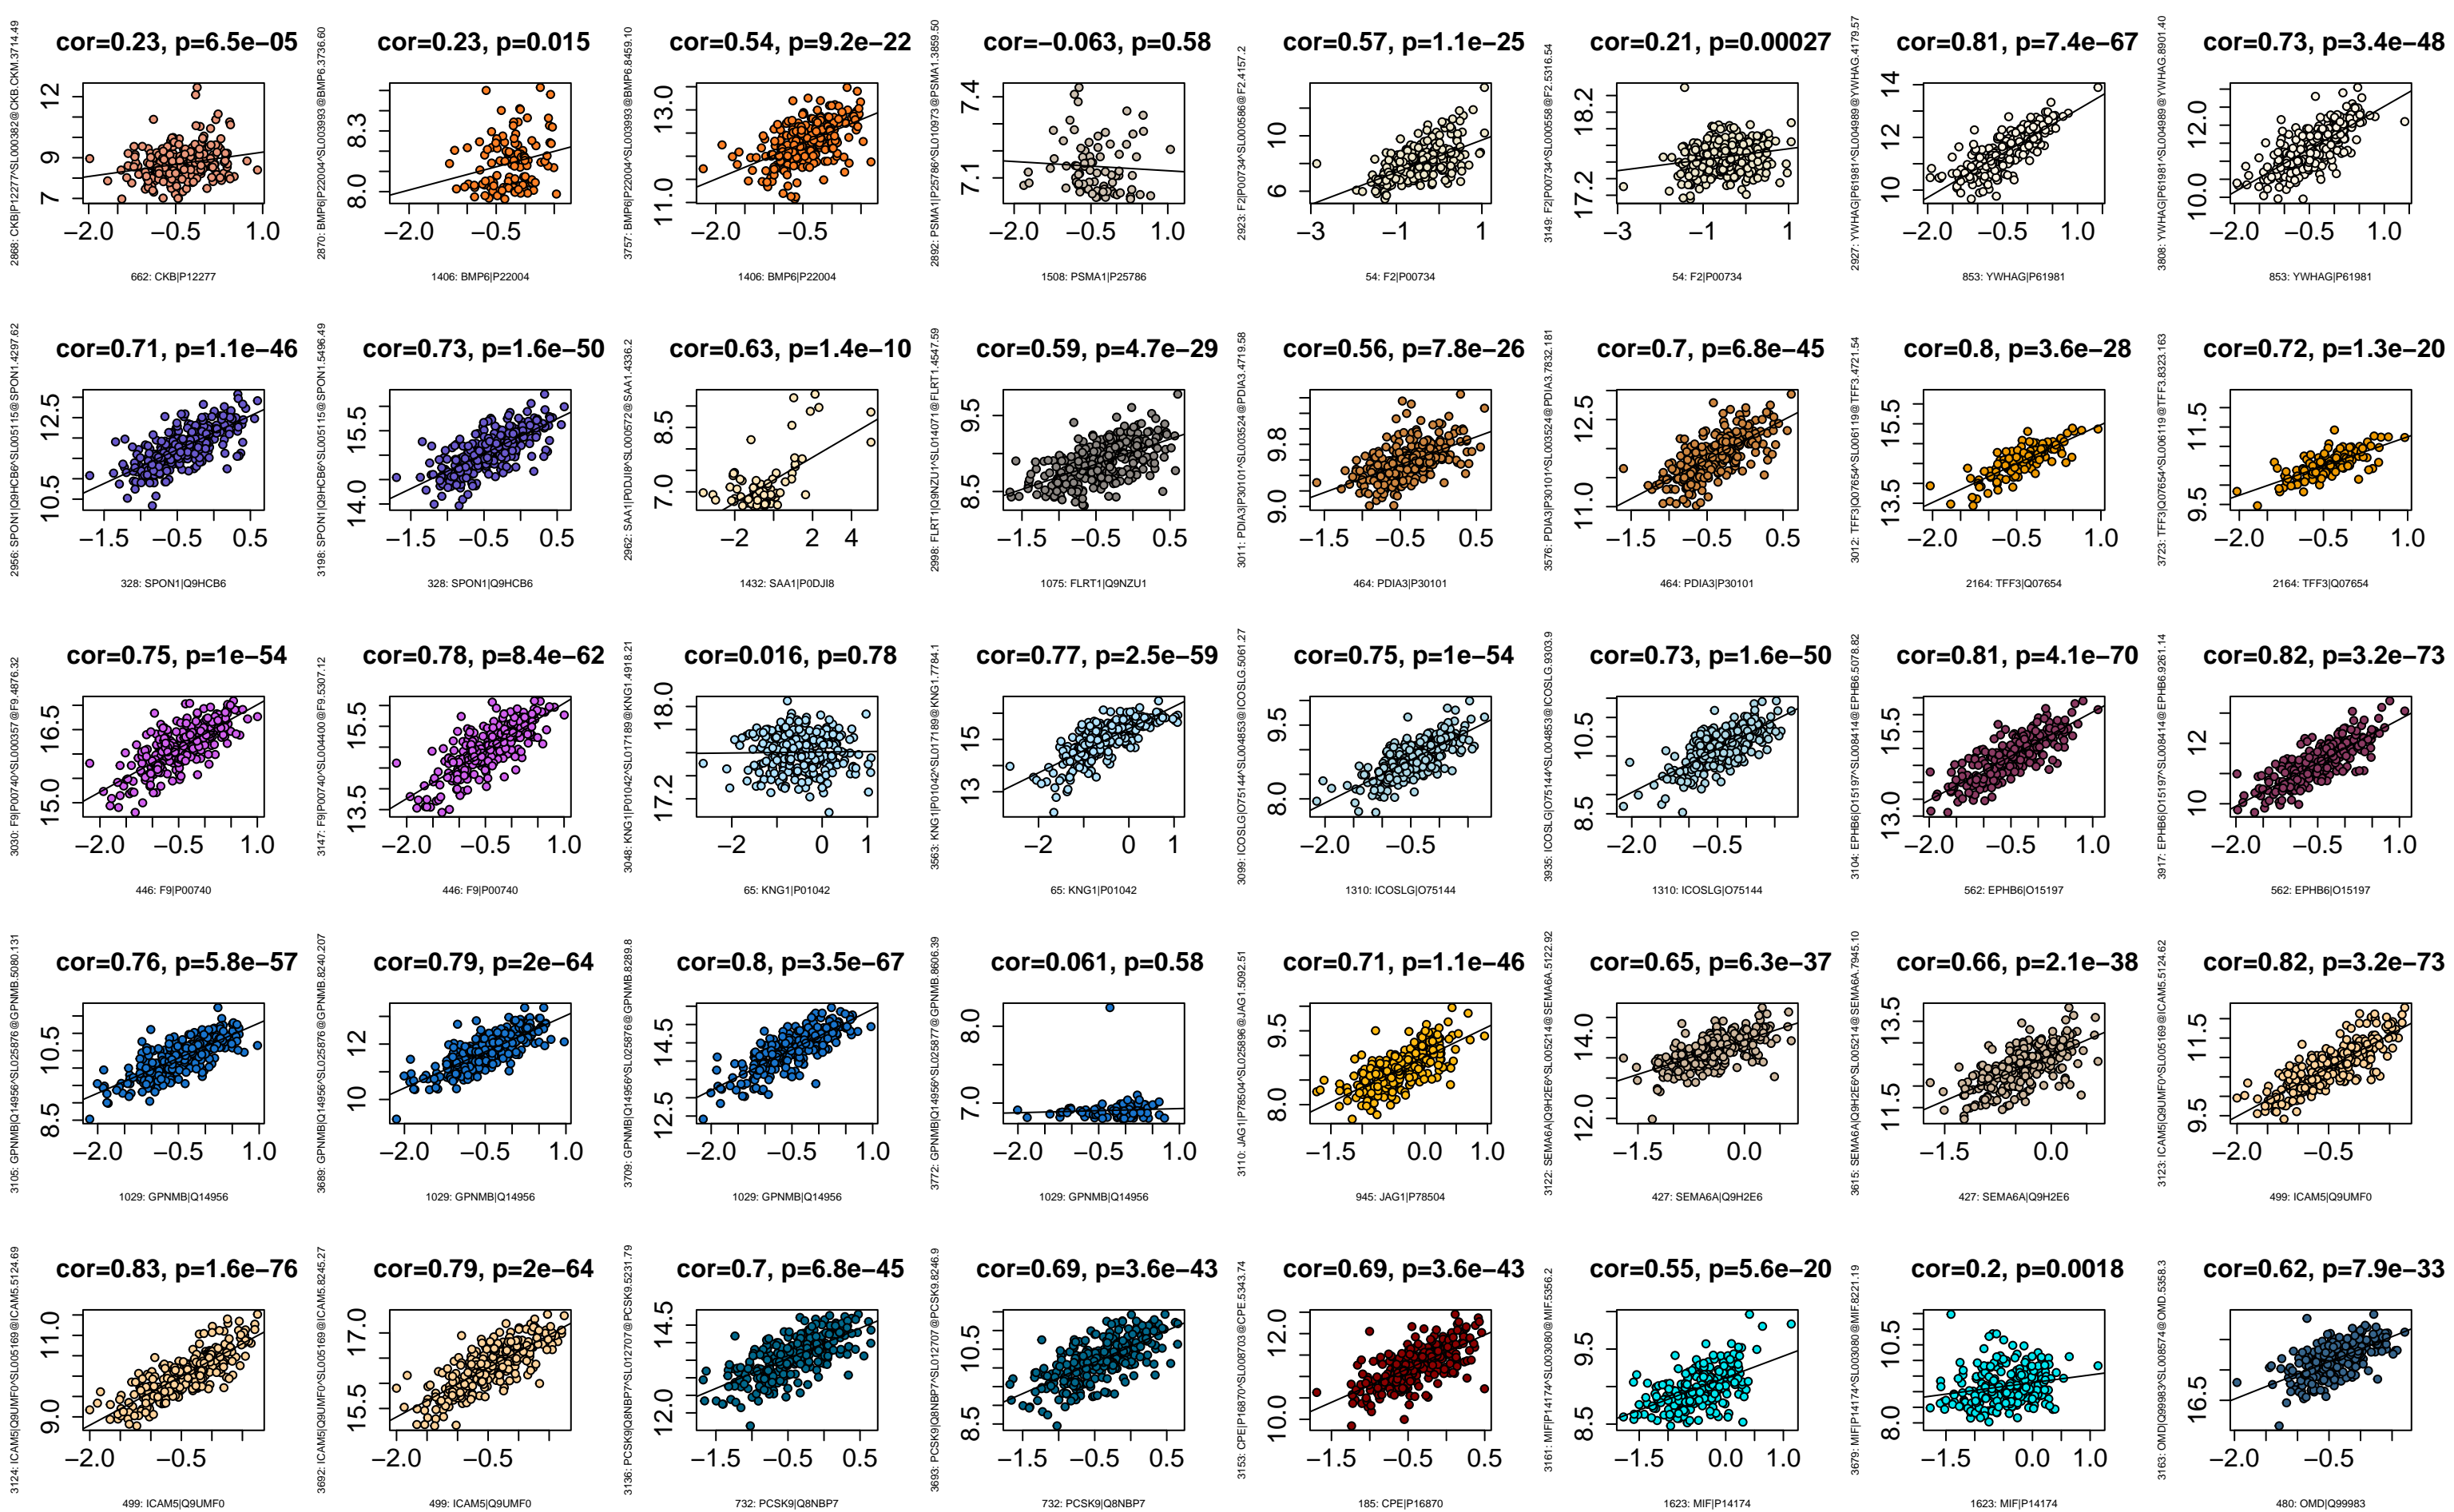

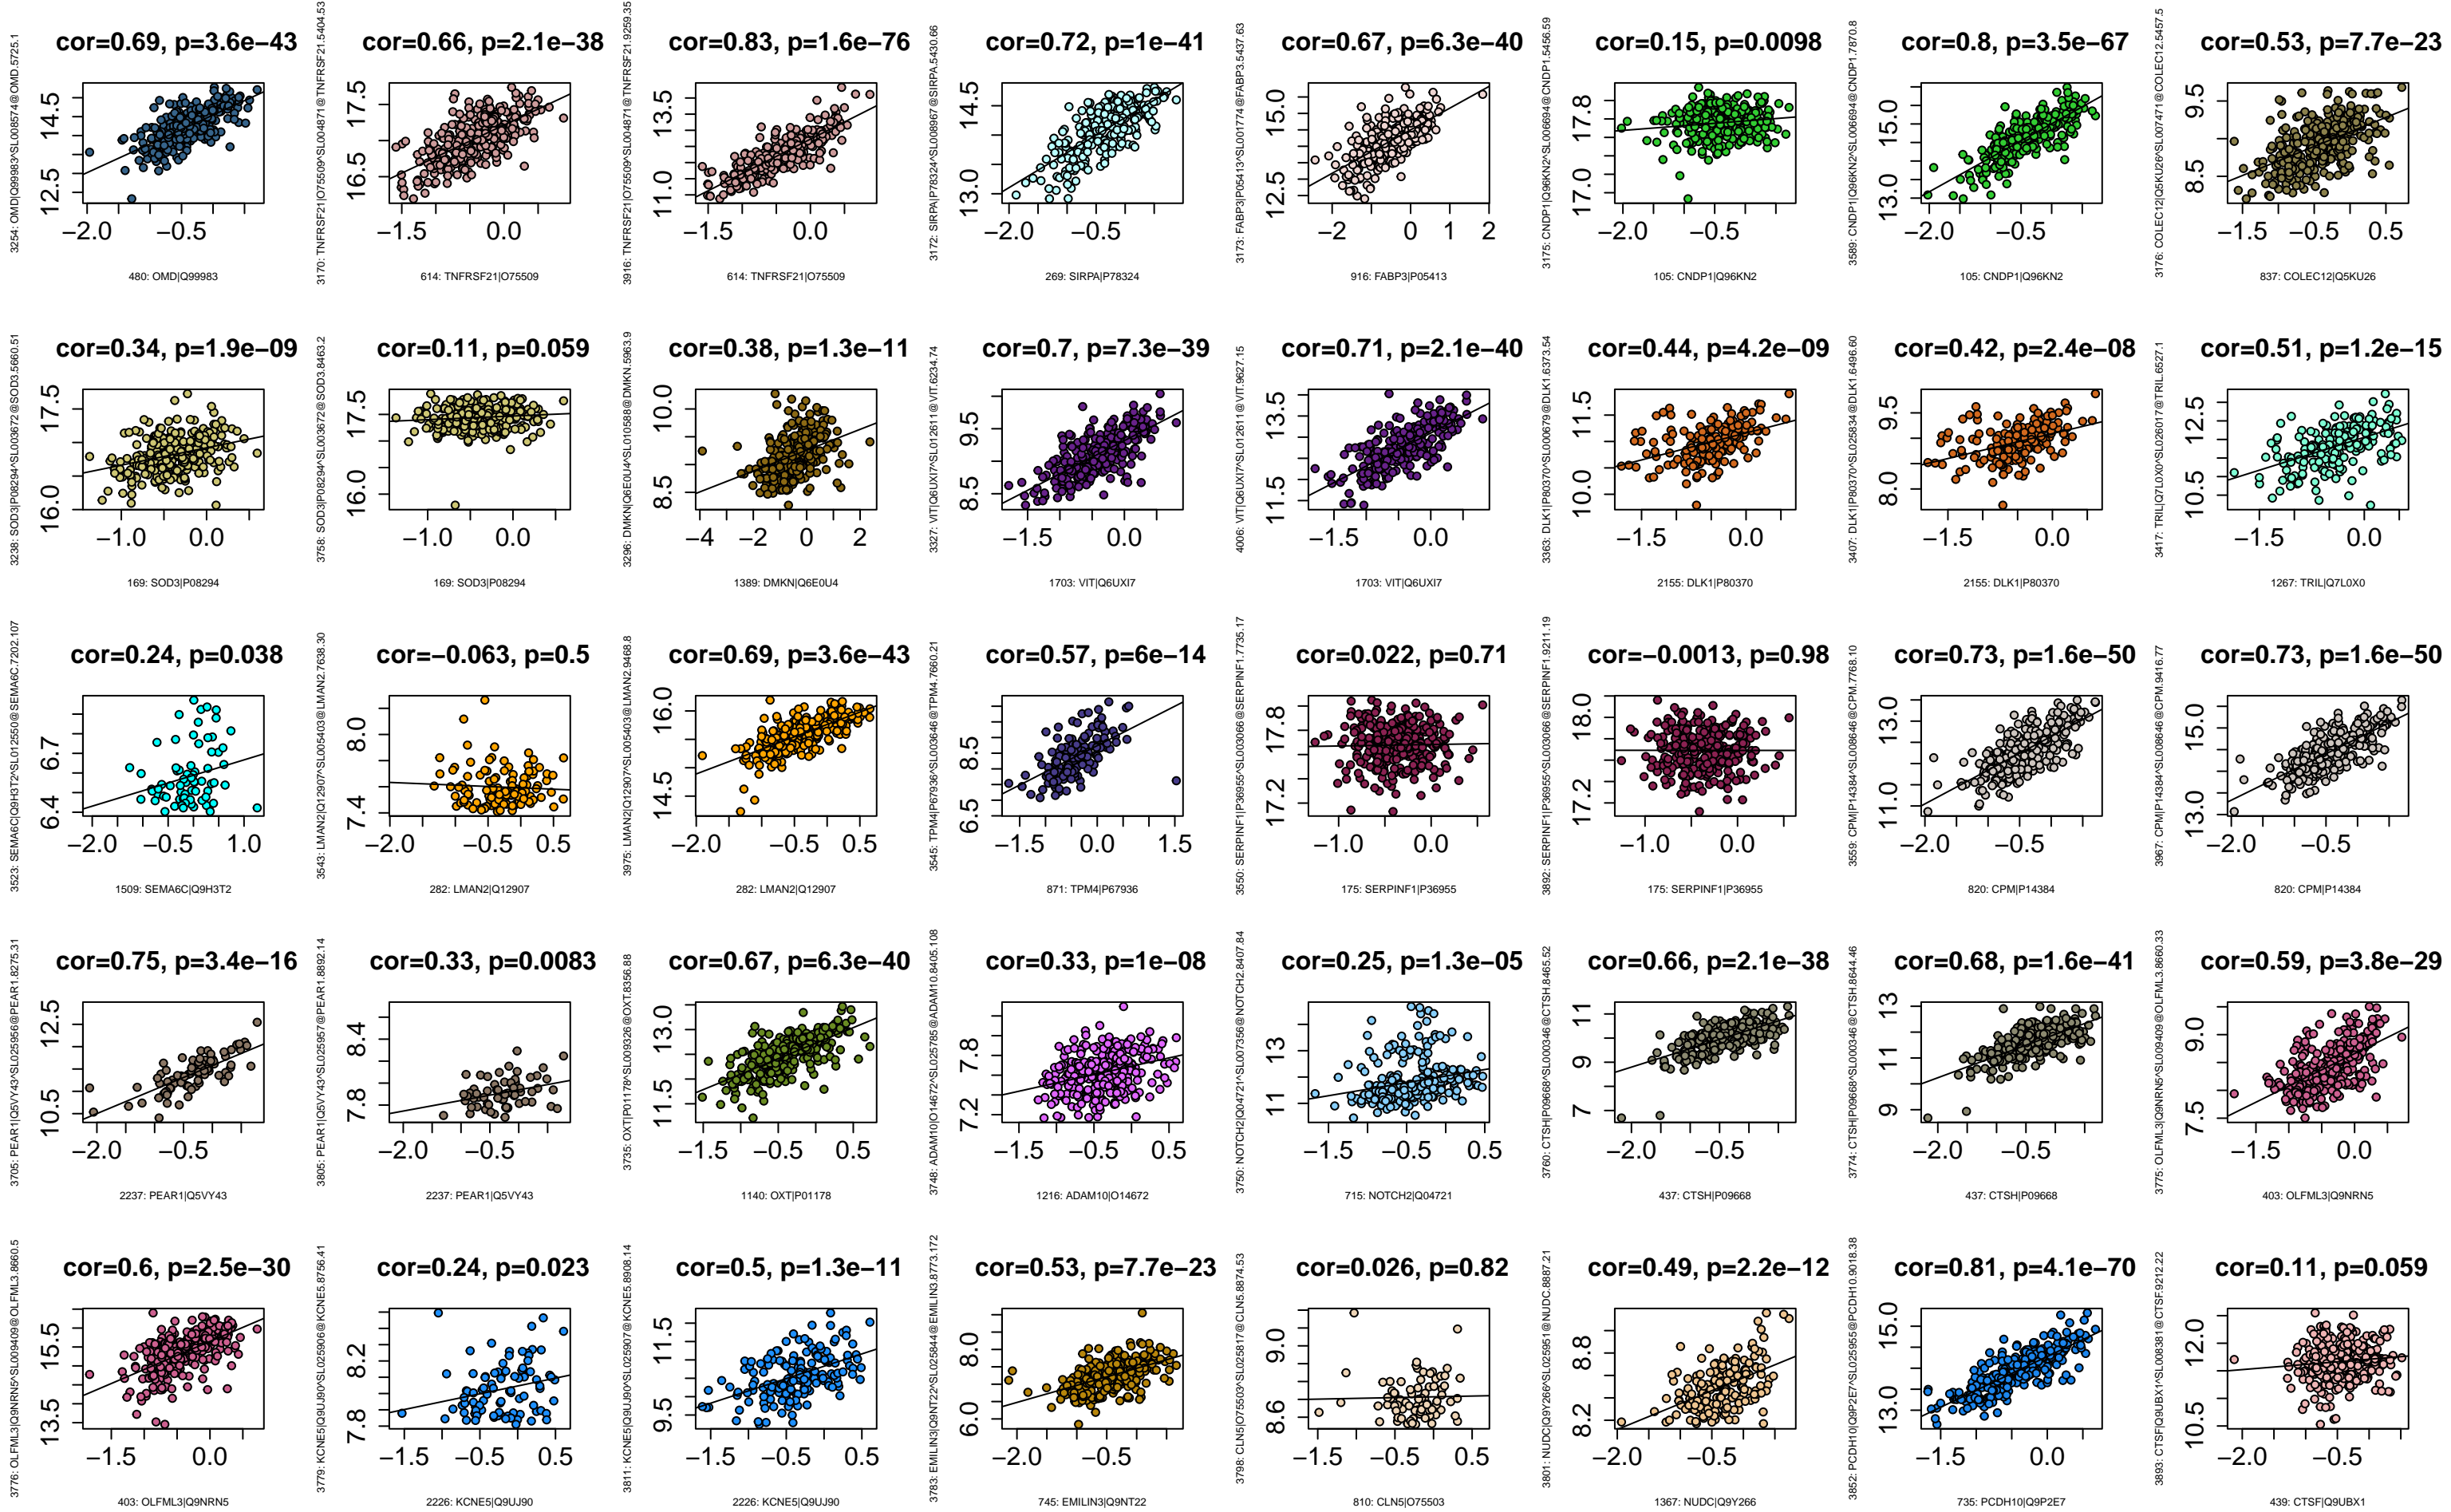



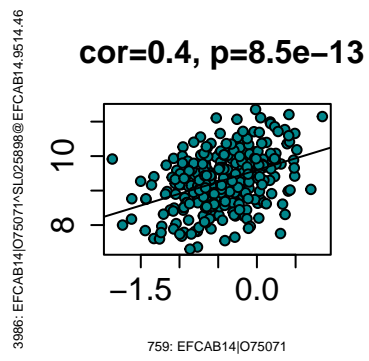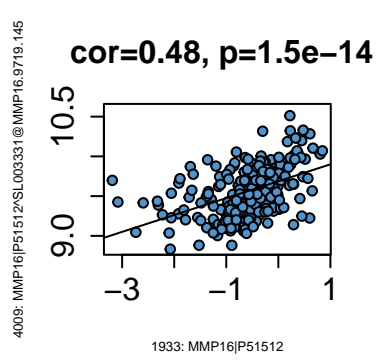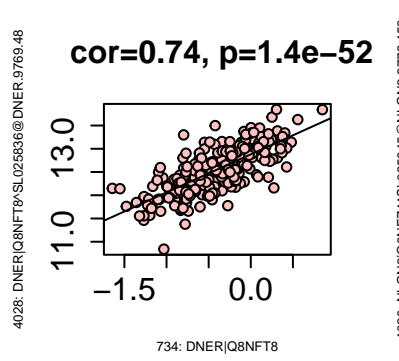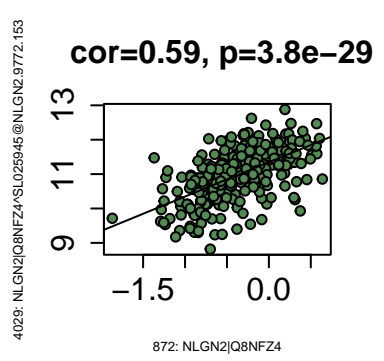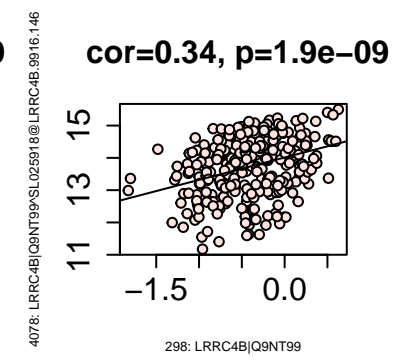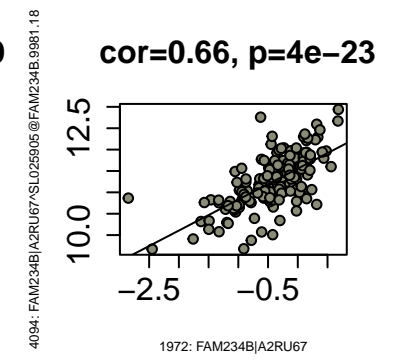

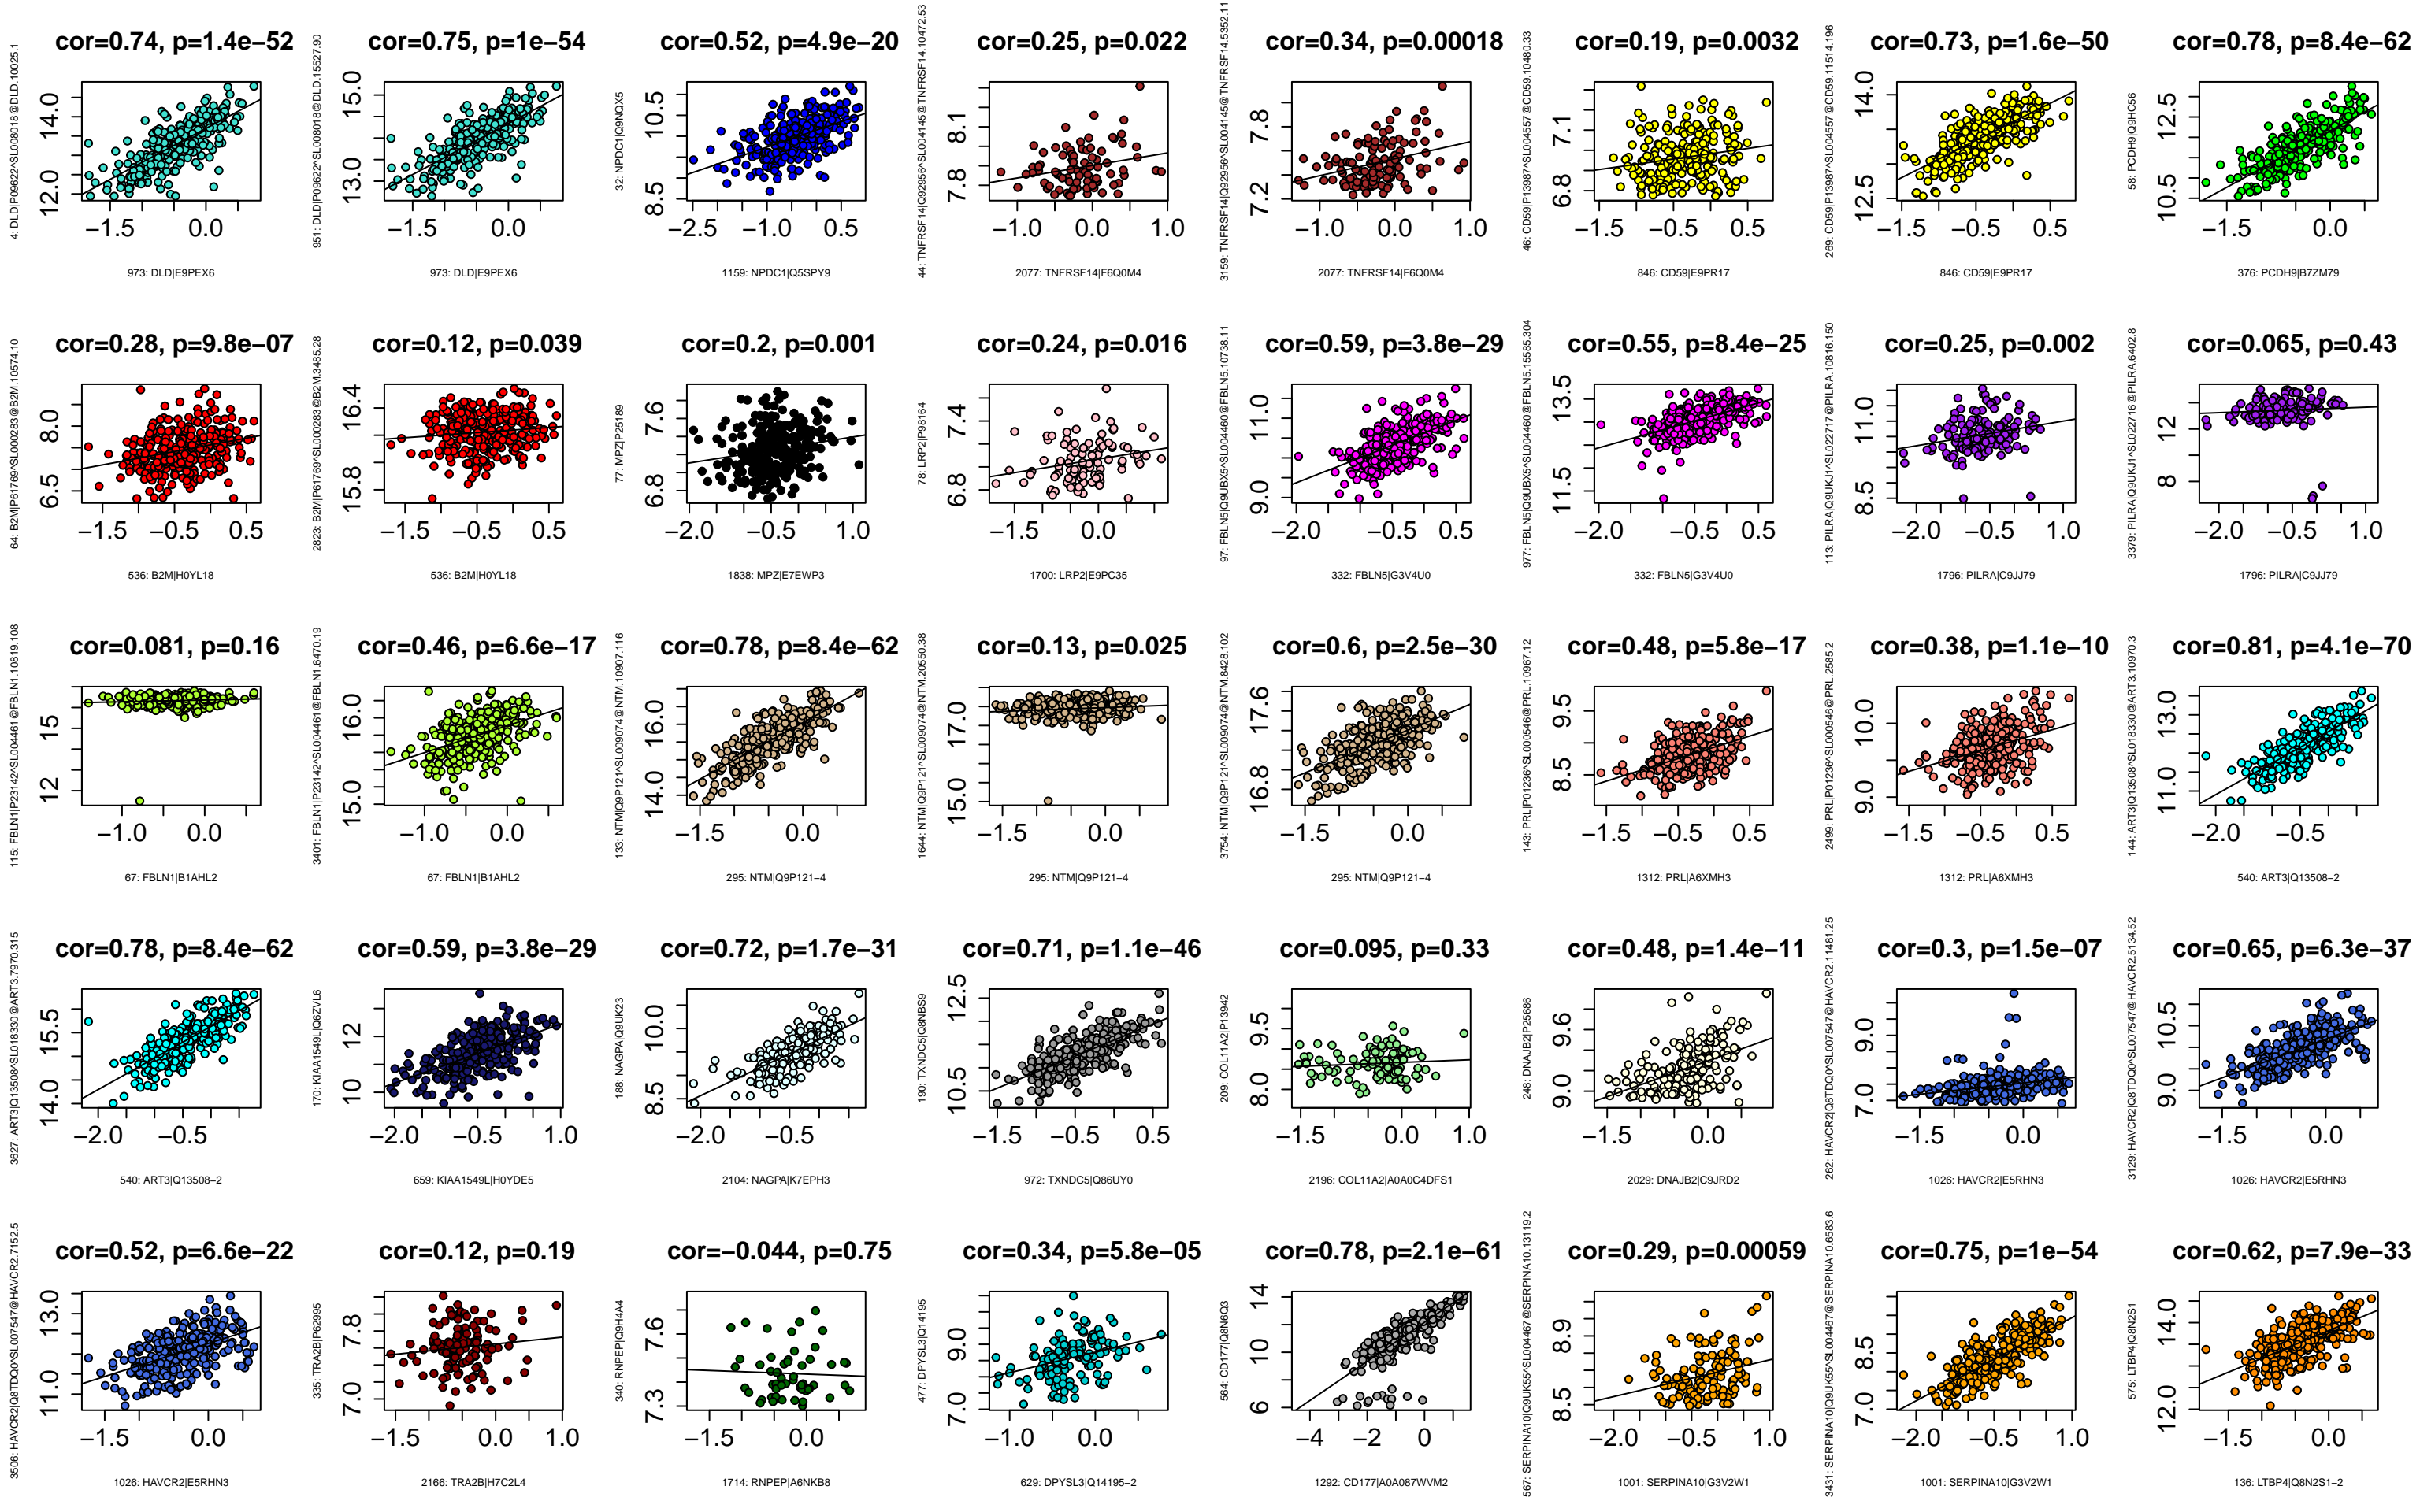

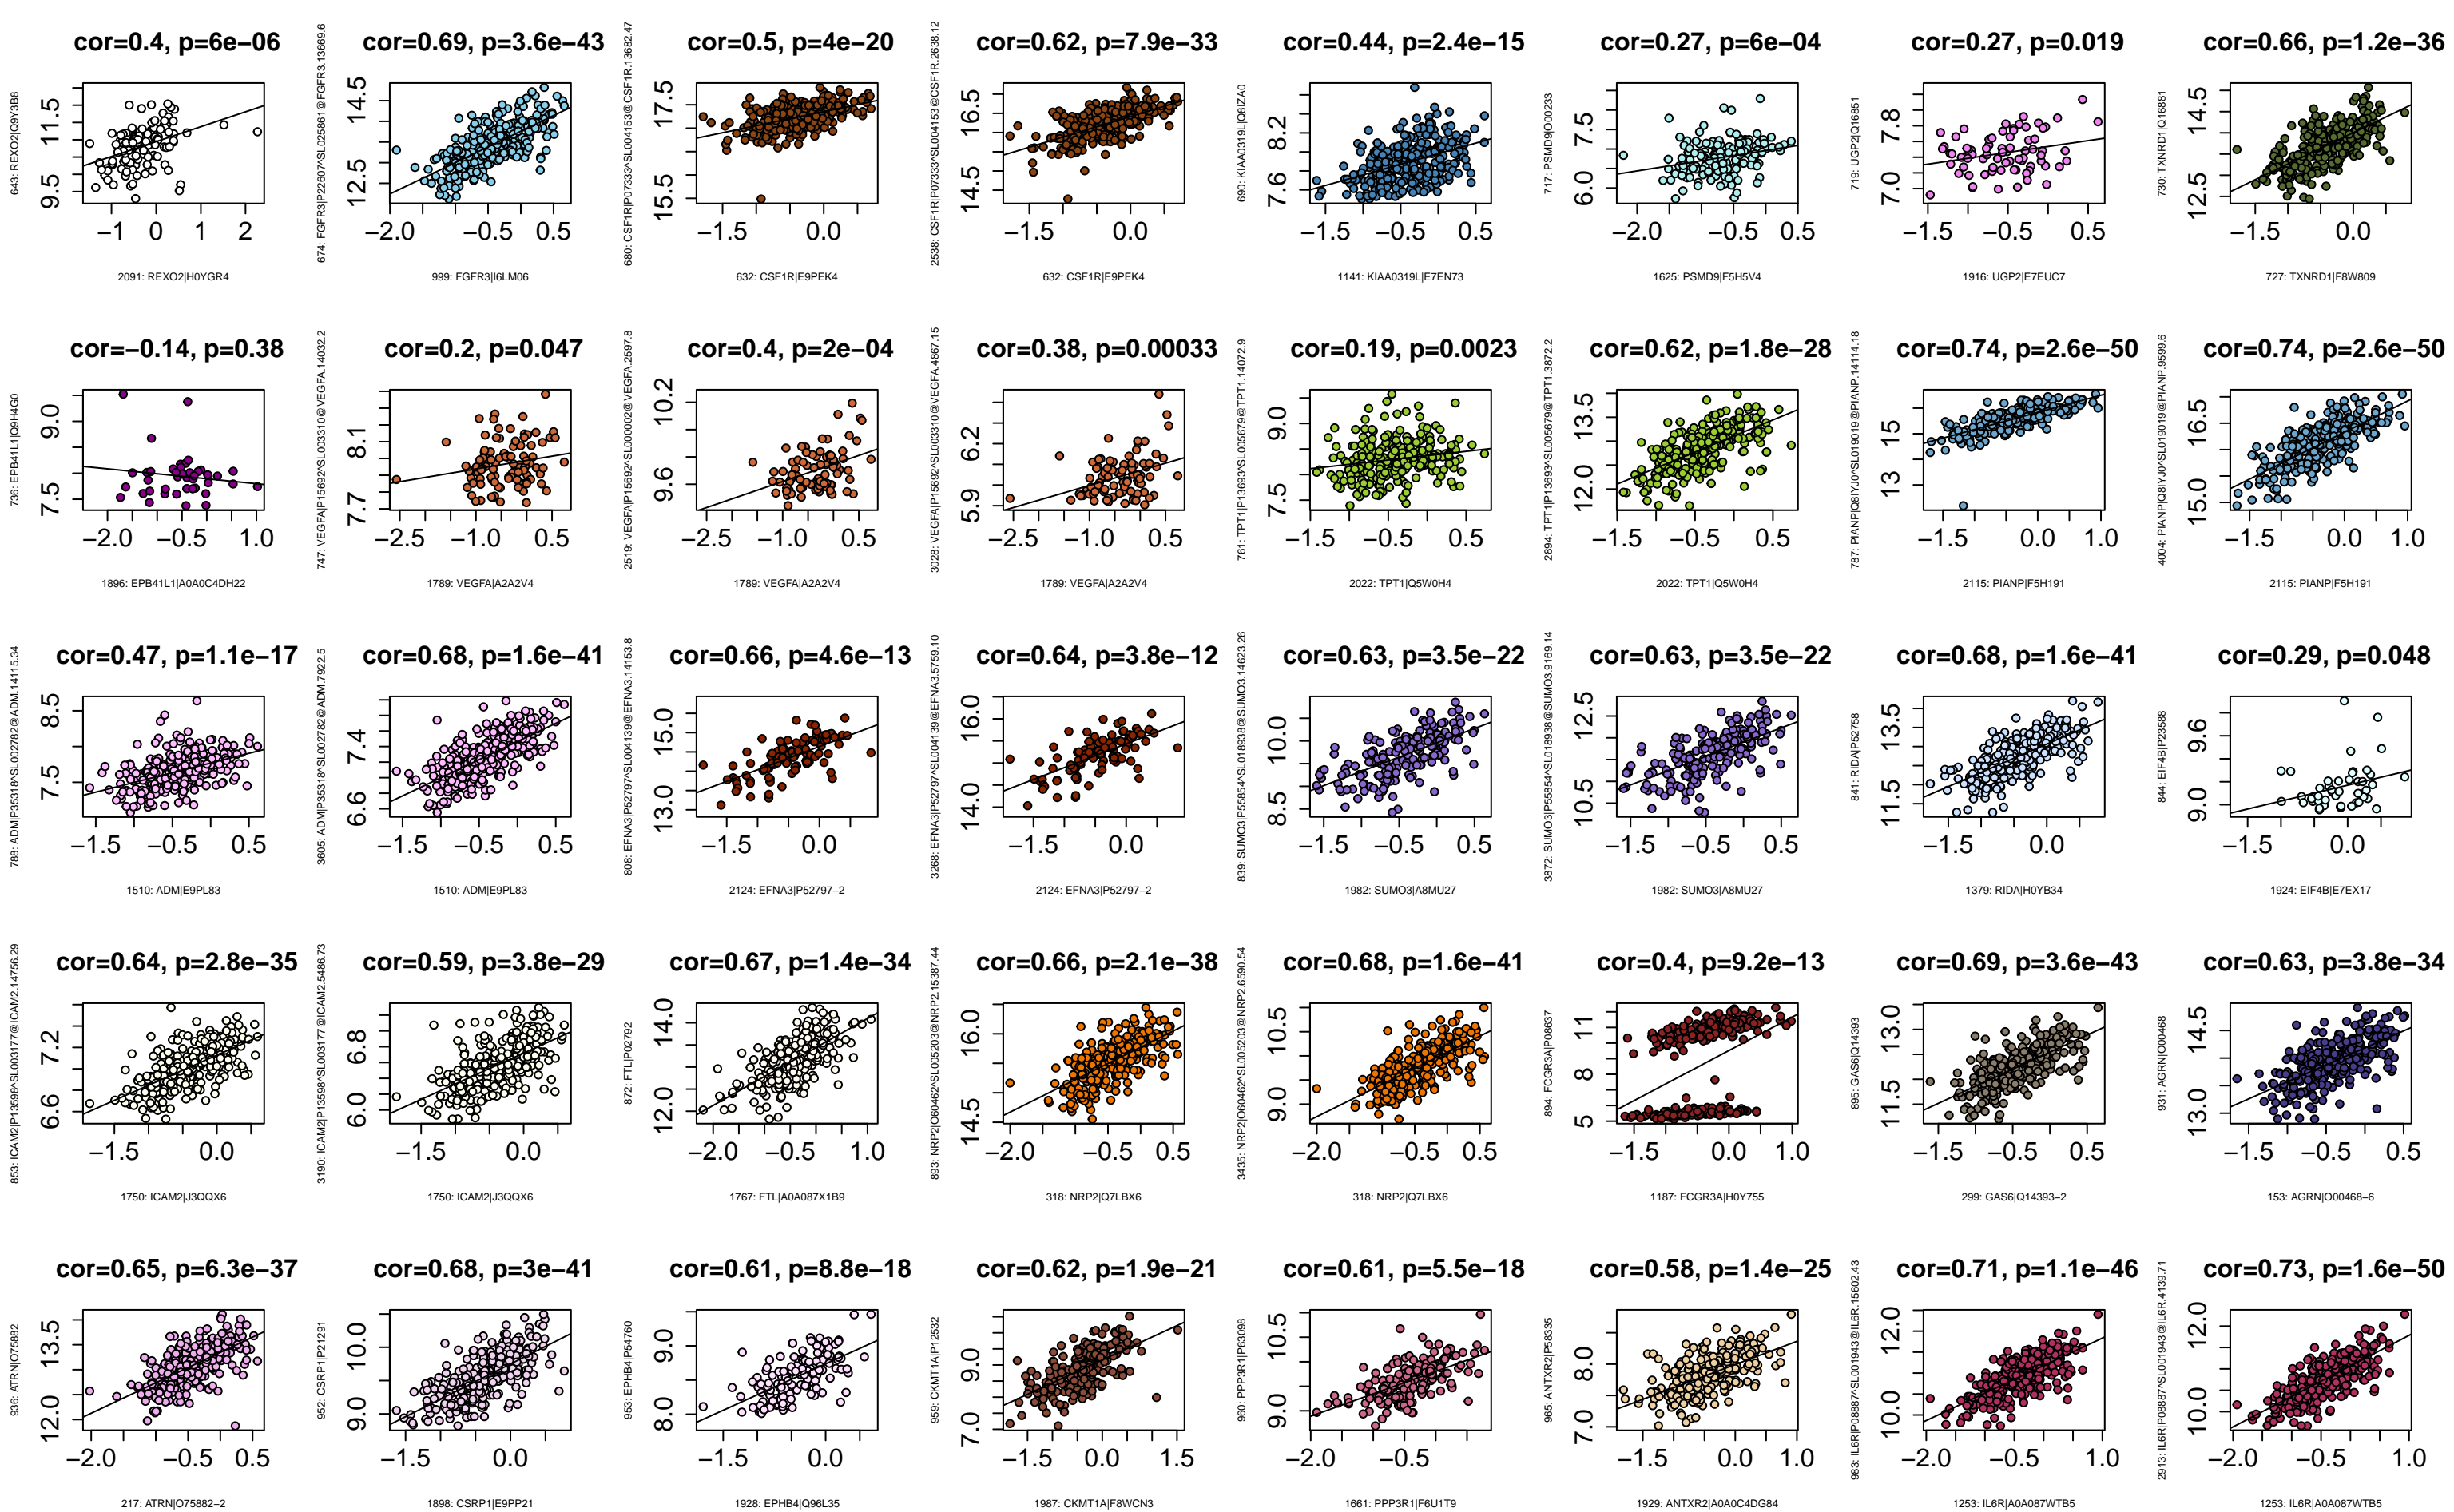

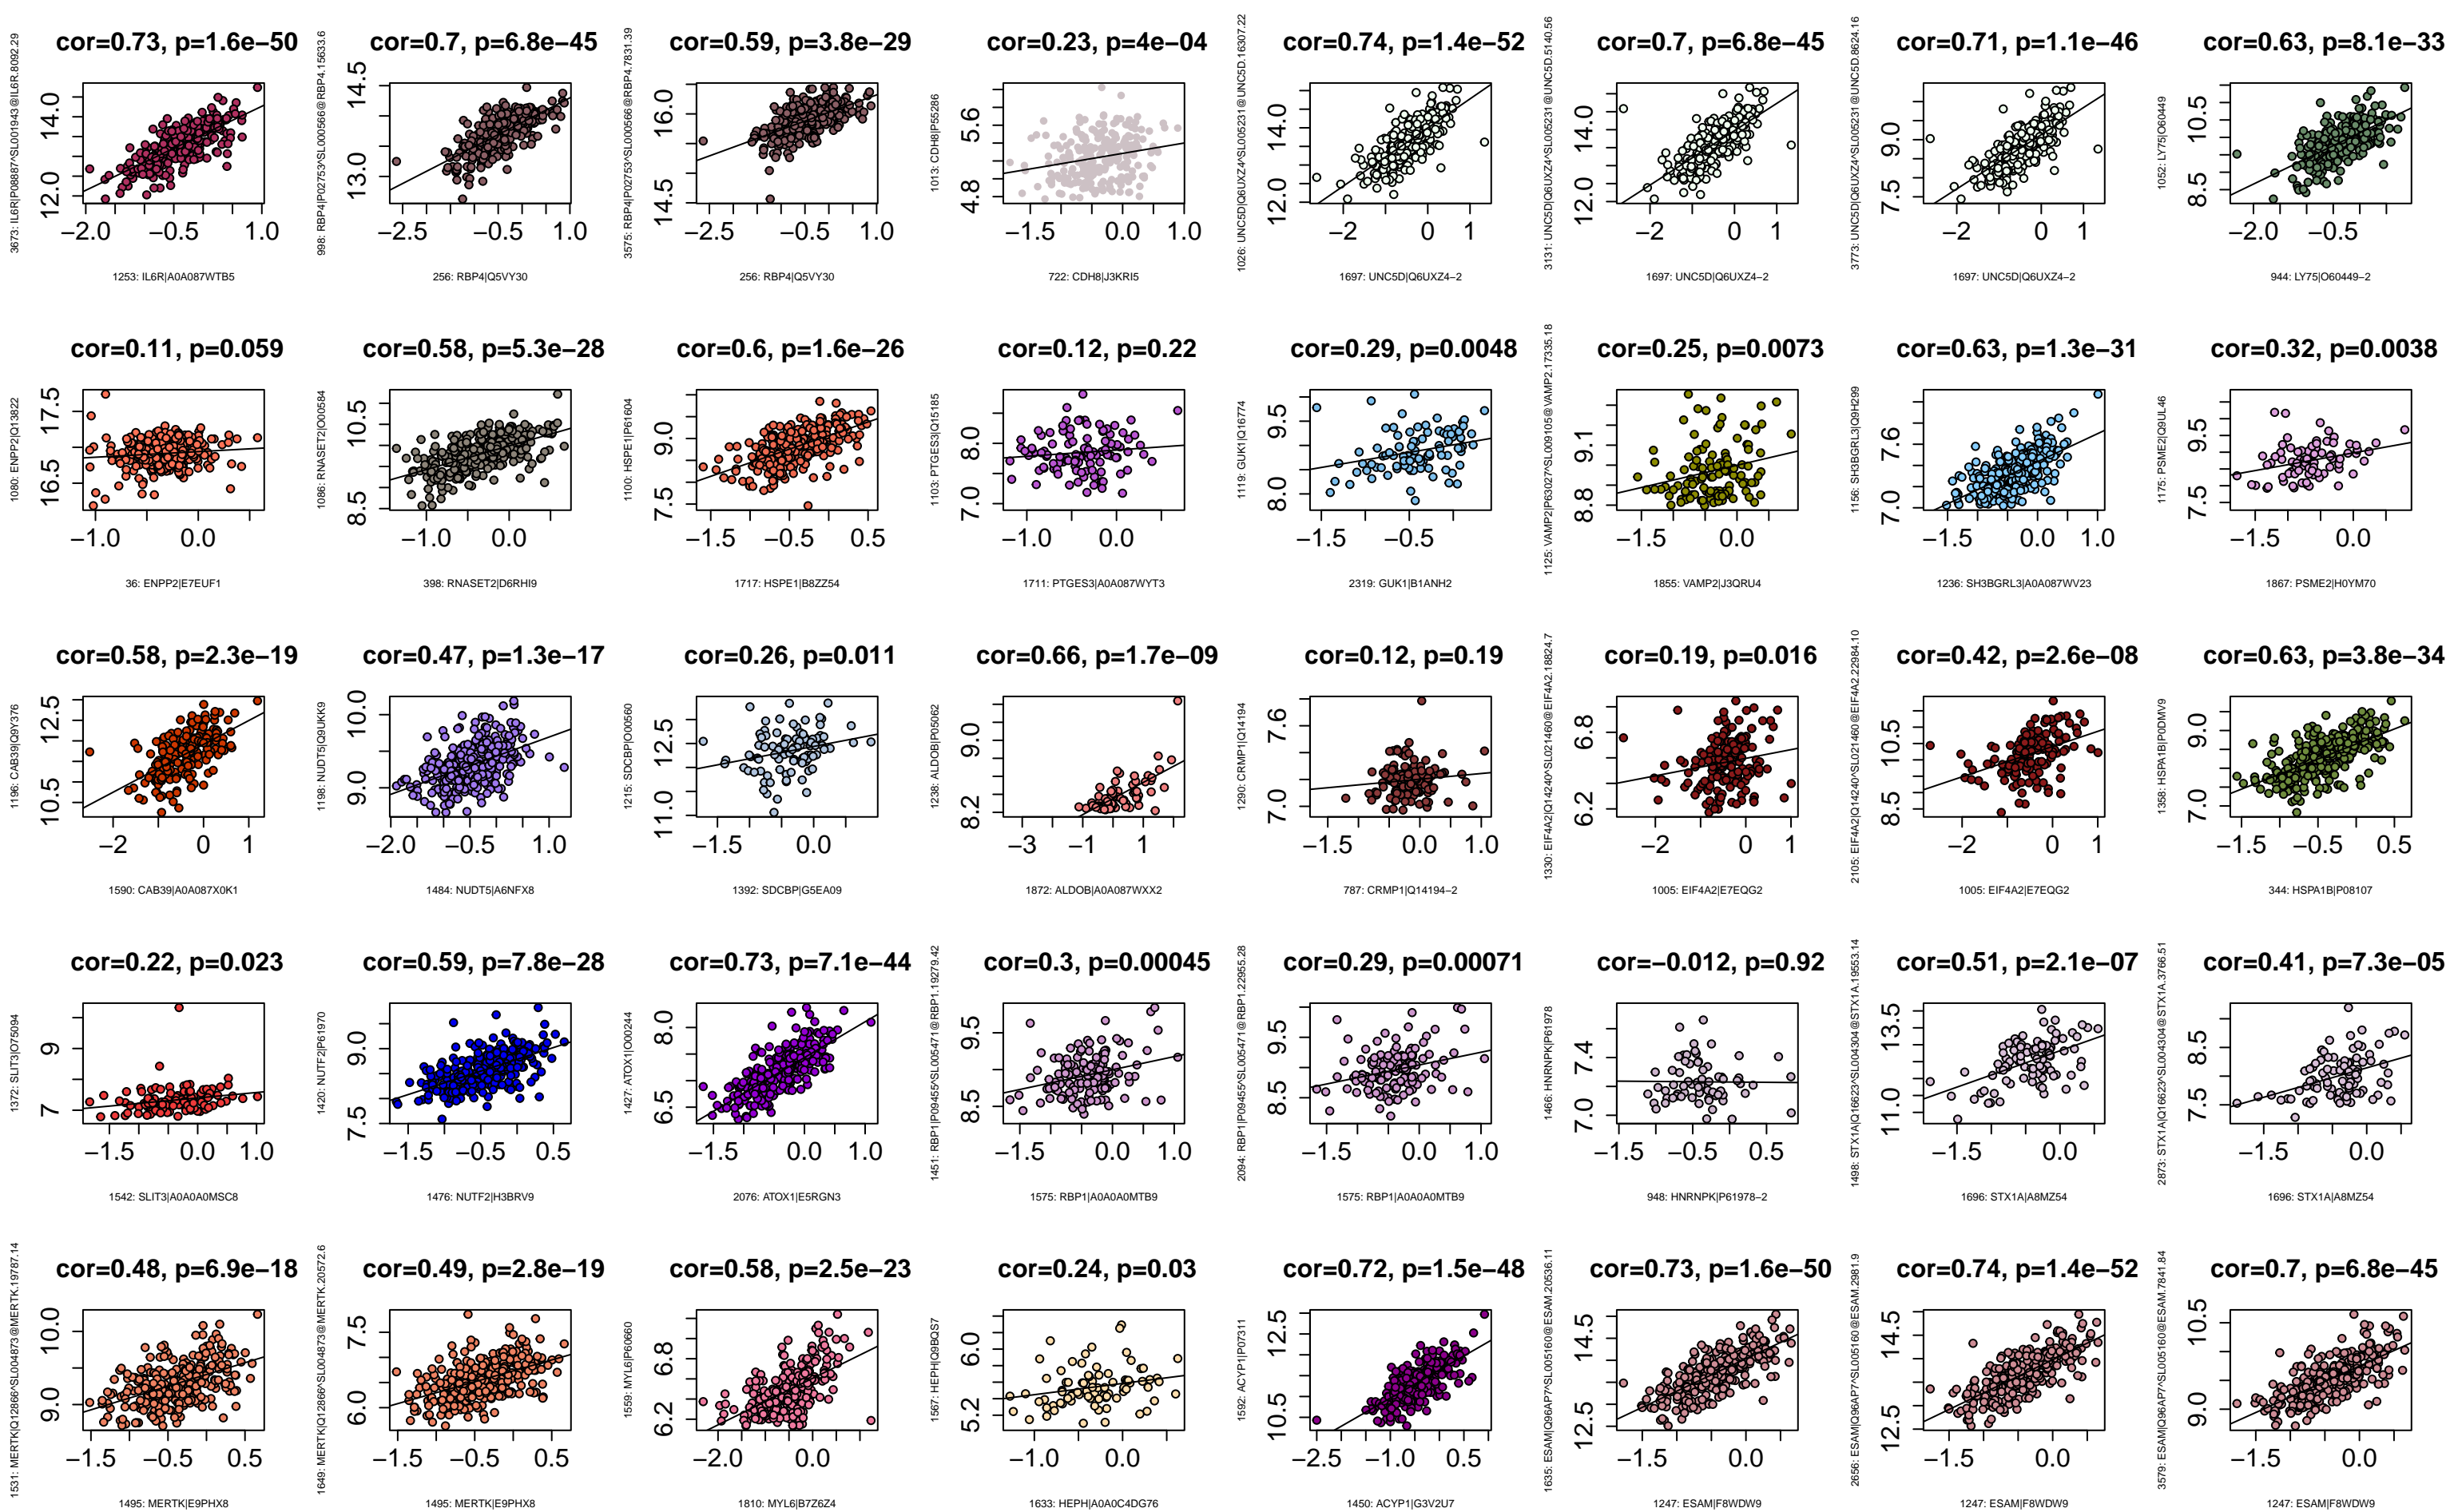

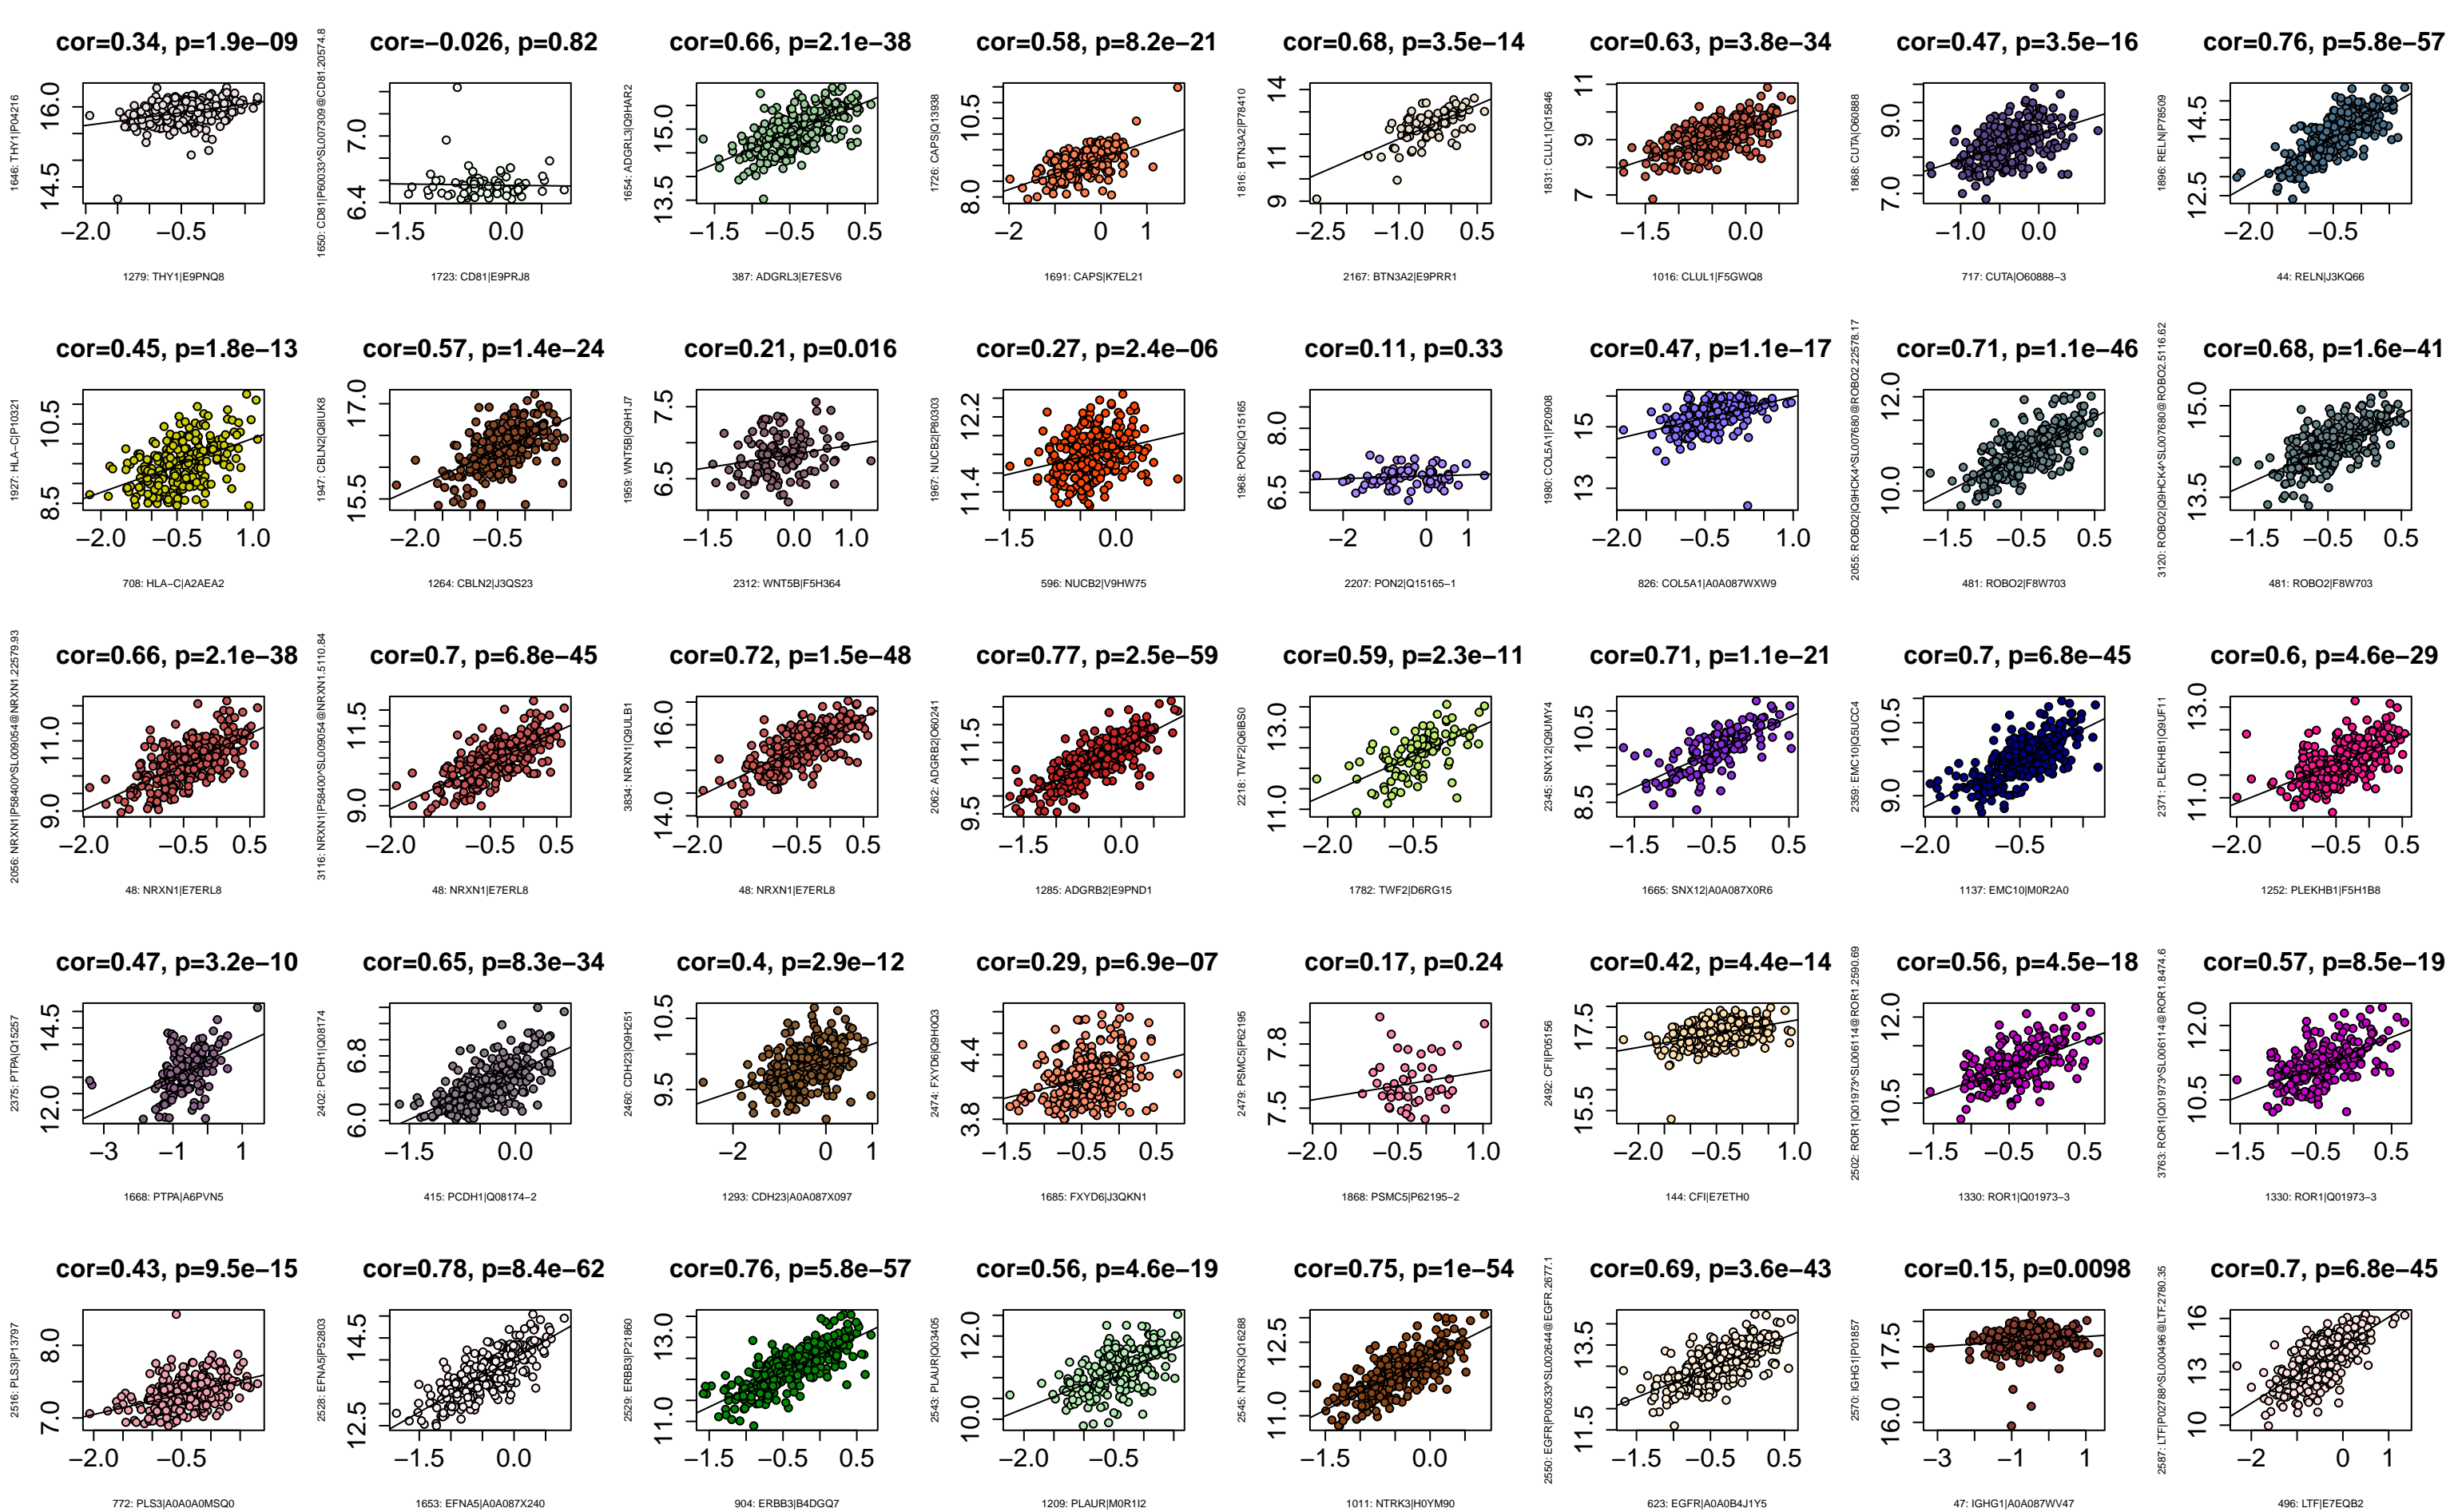

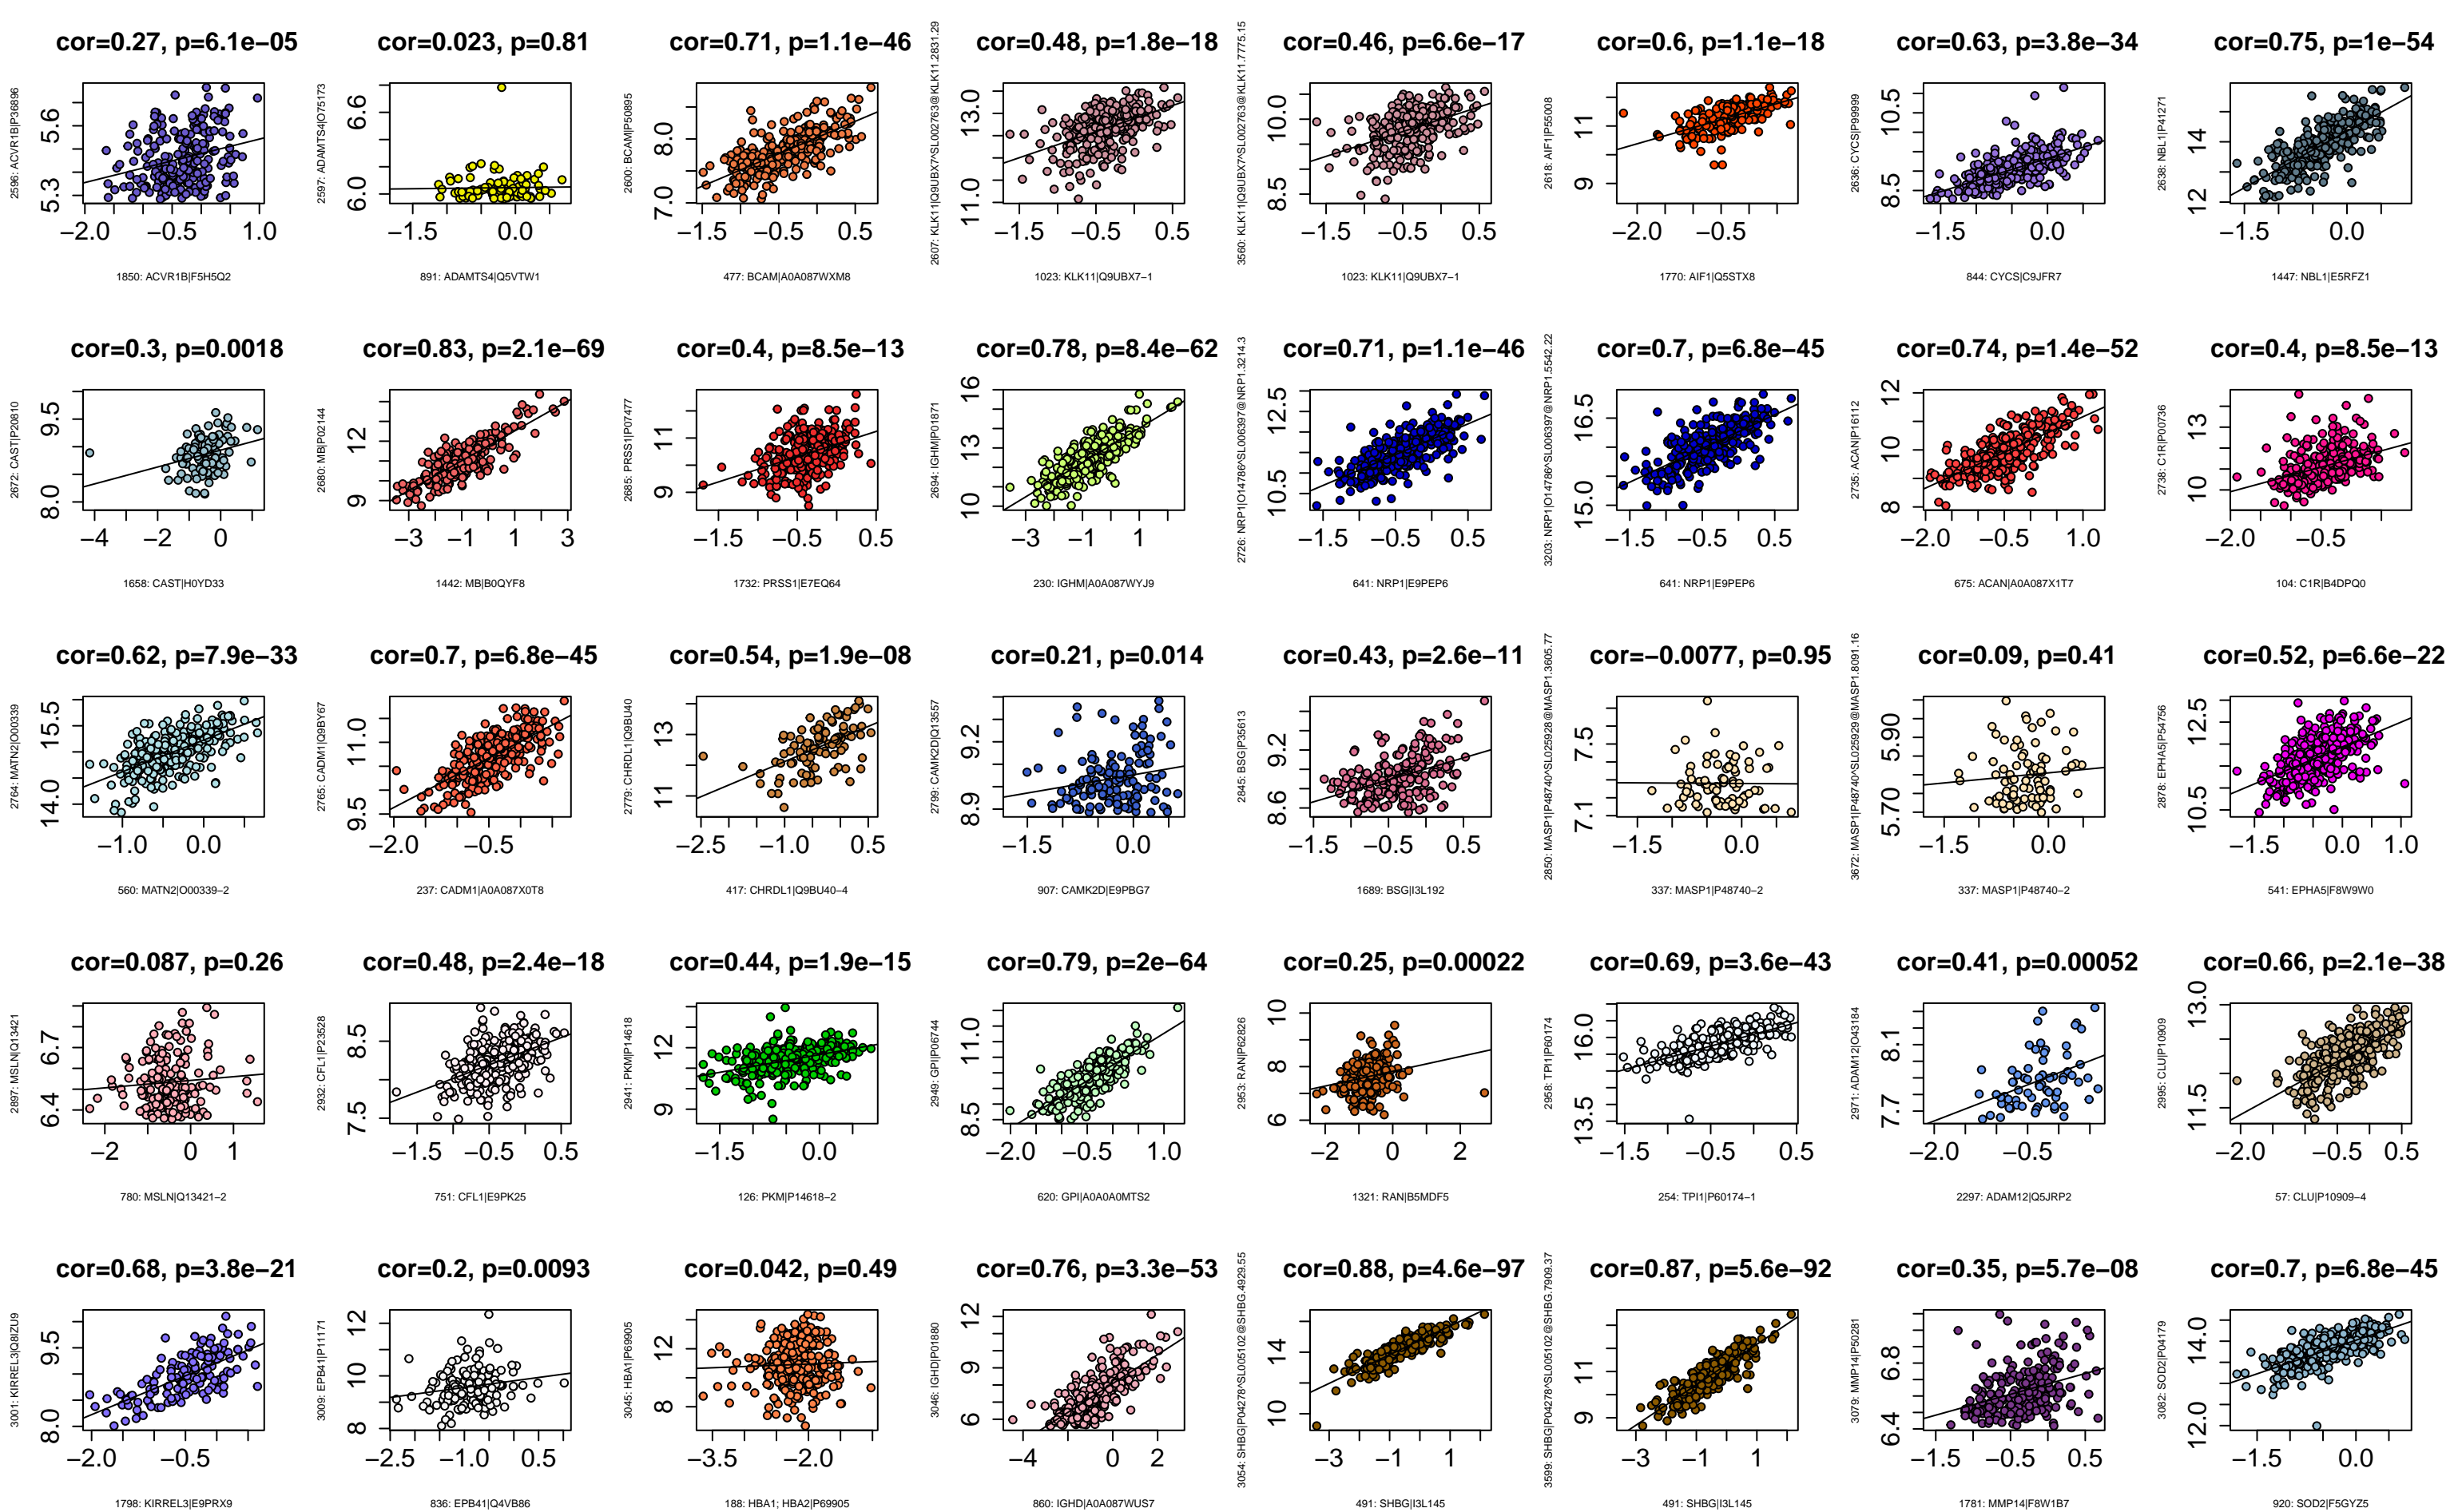

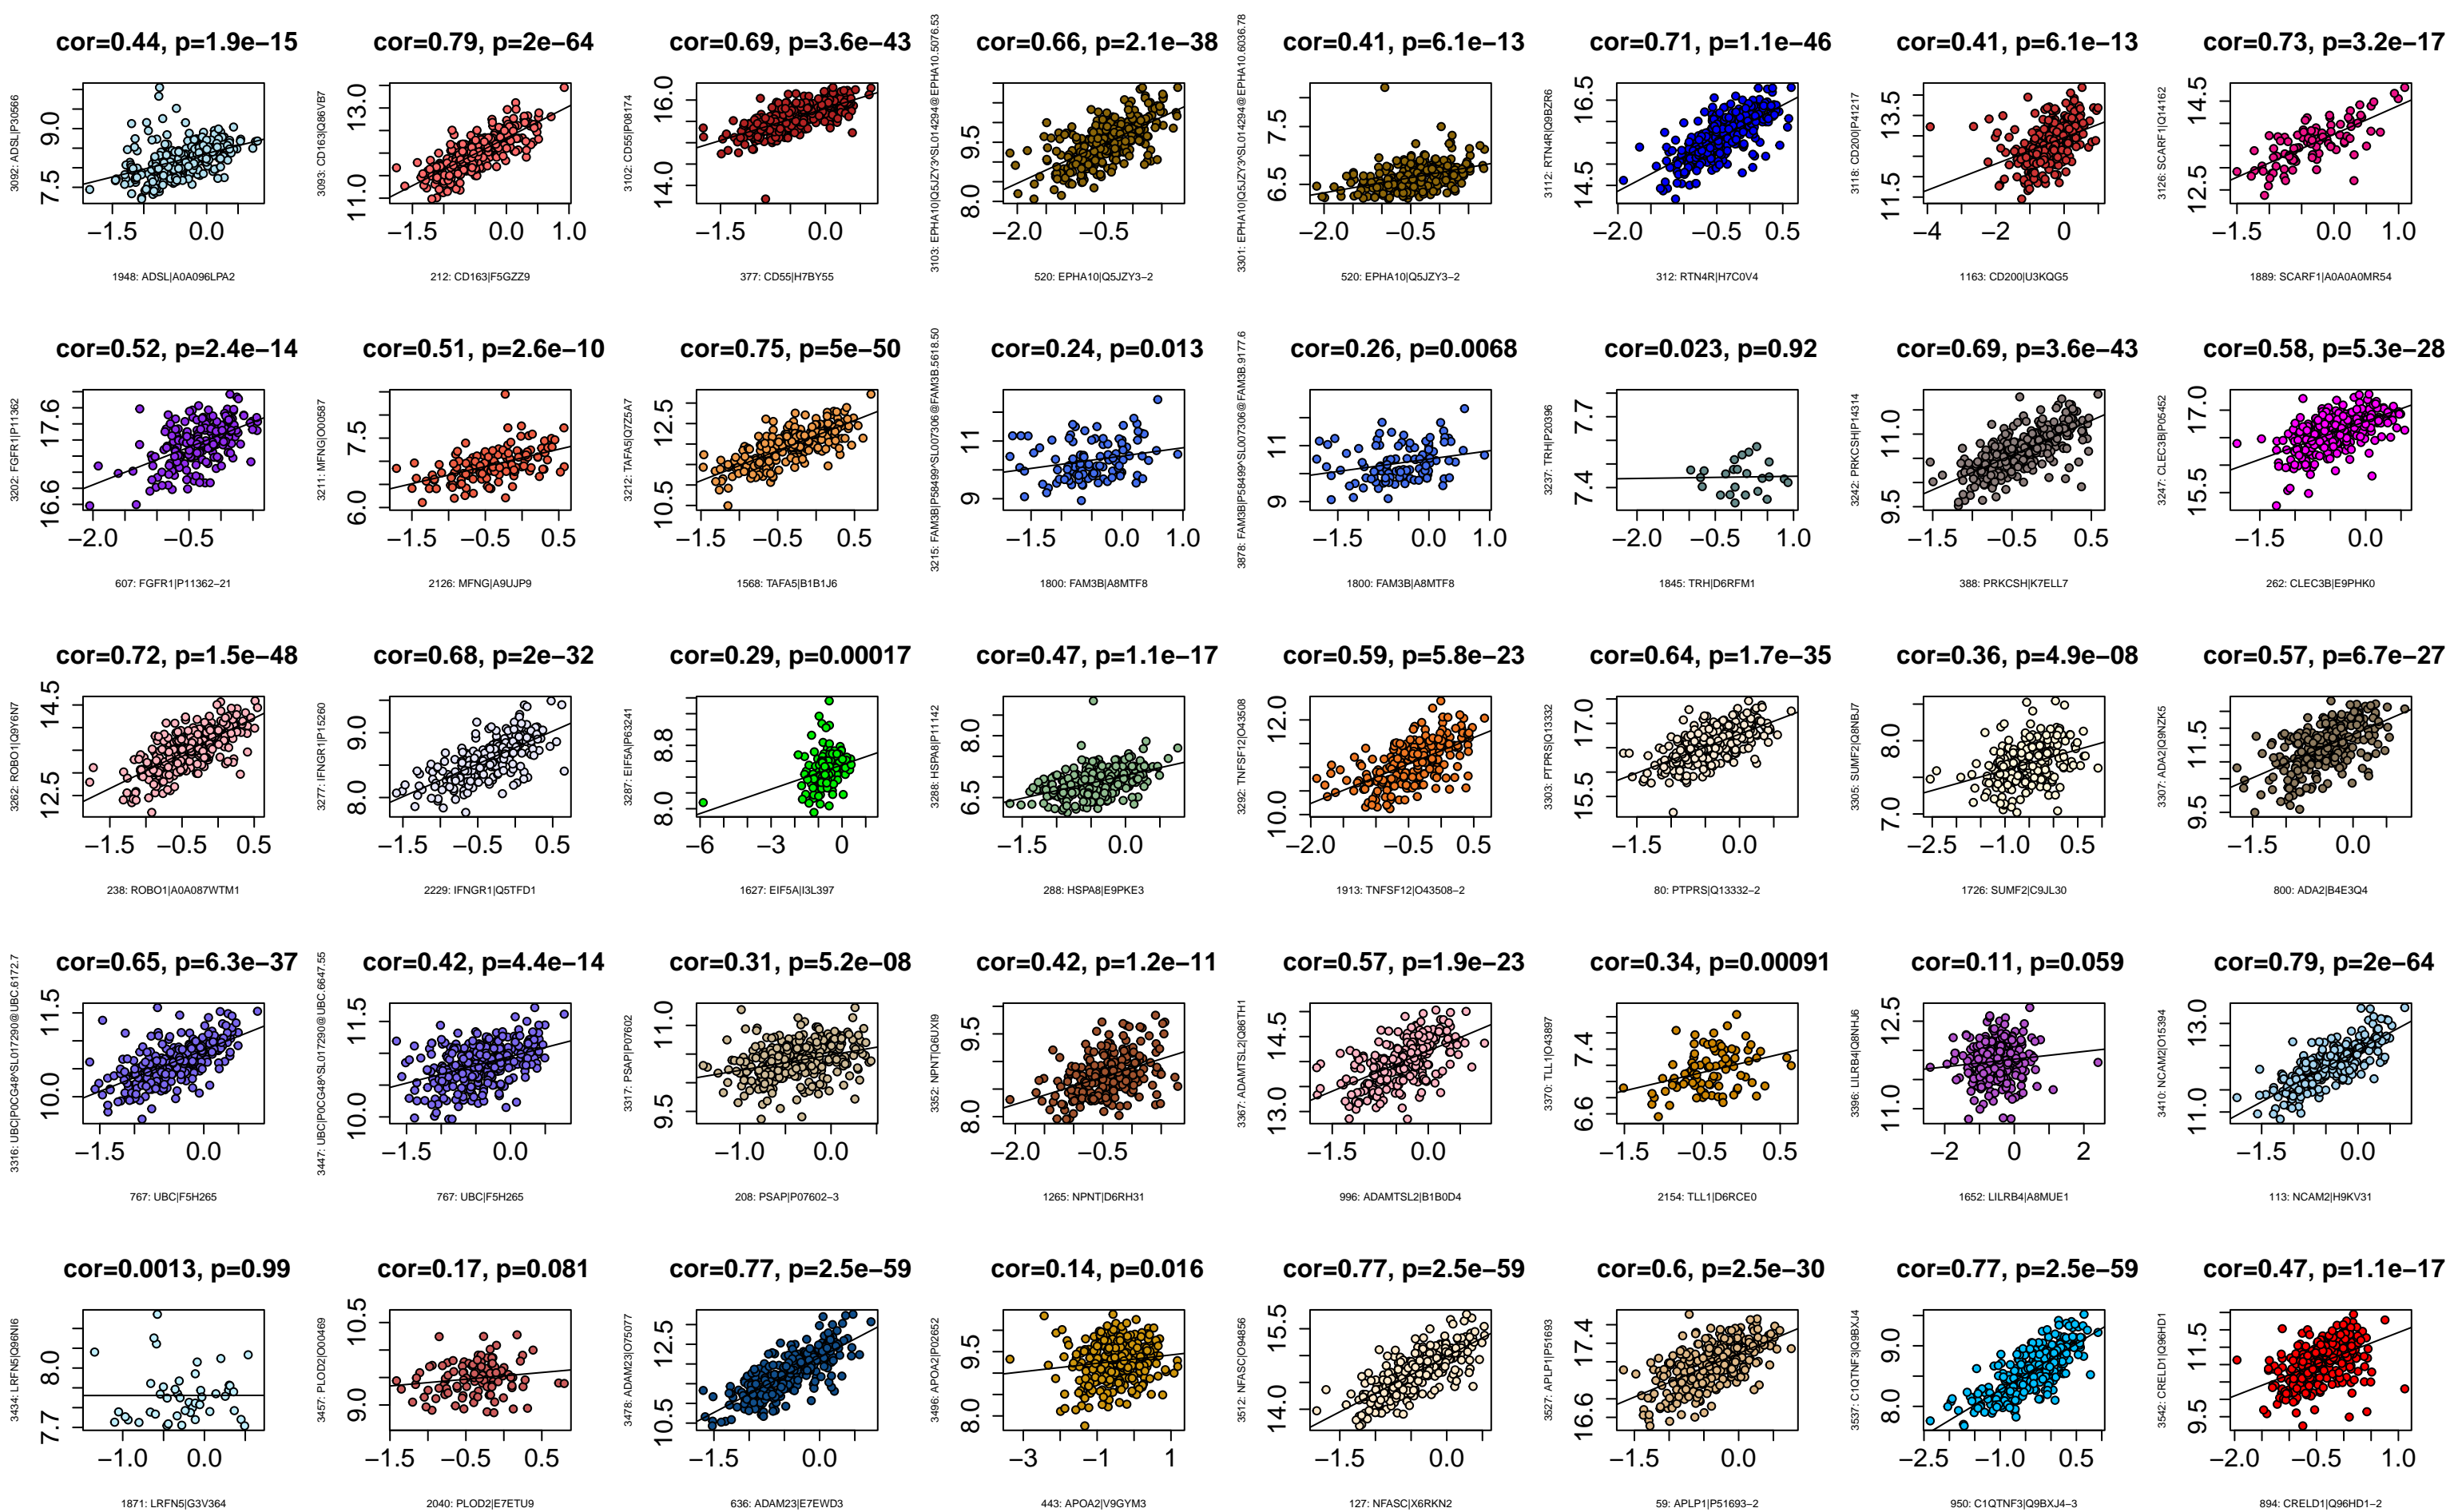

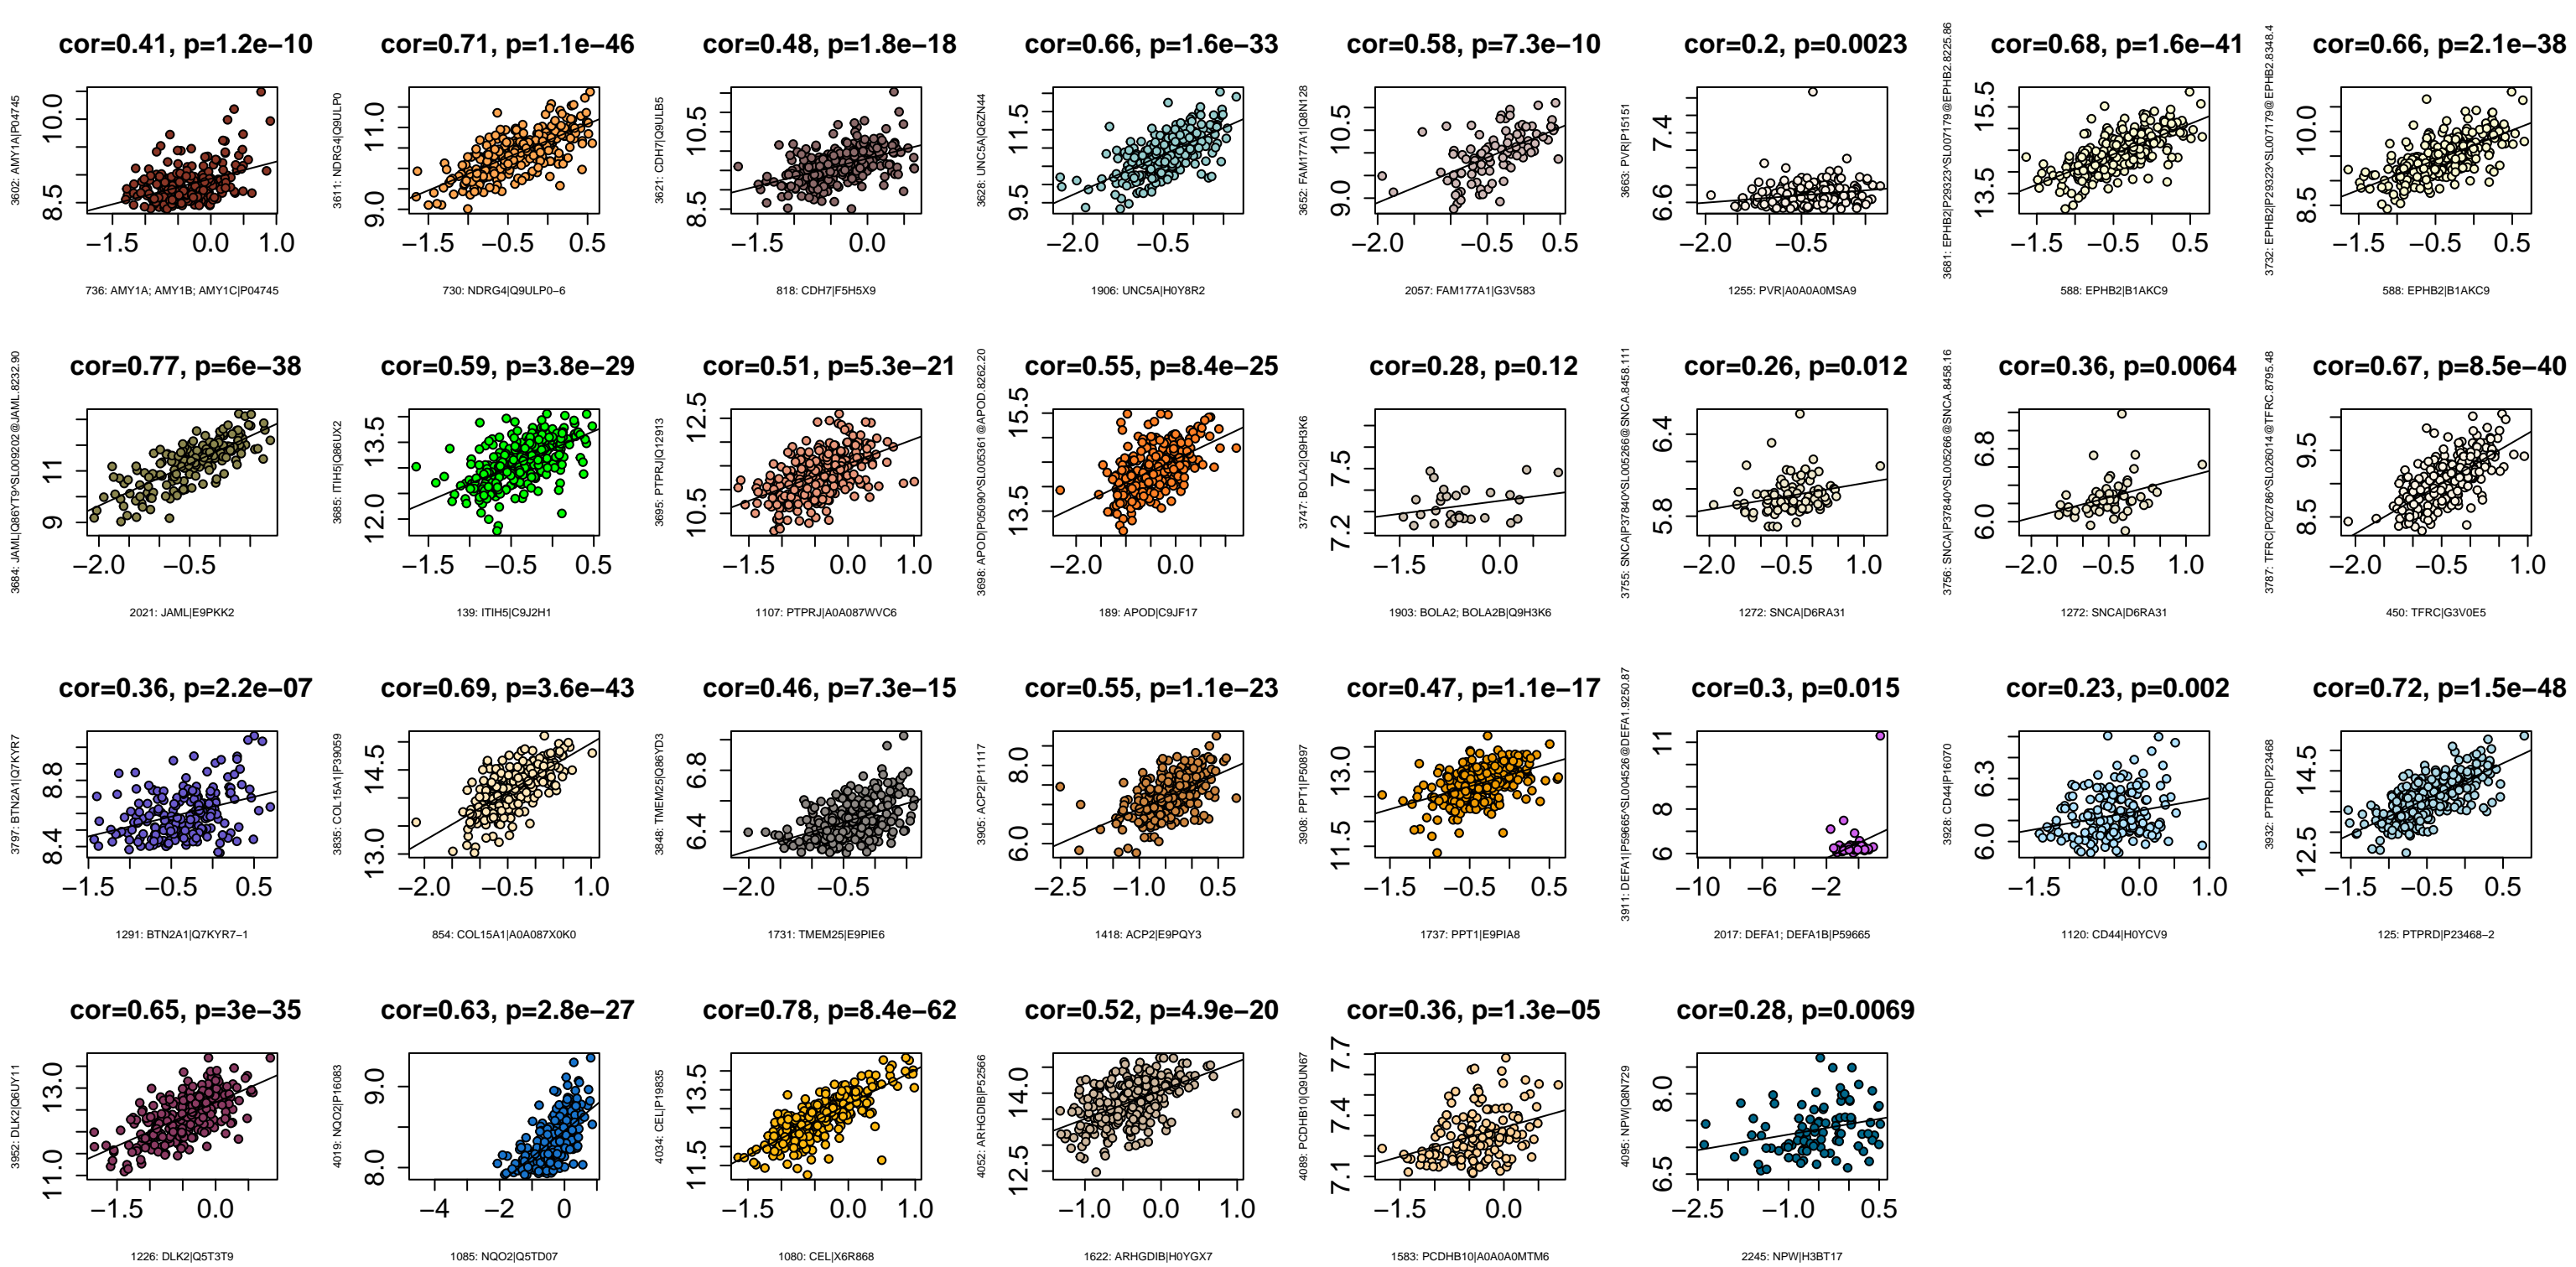



M1 turquoise

### Ontology Types

- Biological Process
- Molecular Function
- Cellular Component
- Reactome
- WikiPathways
- MSIG.C2

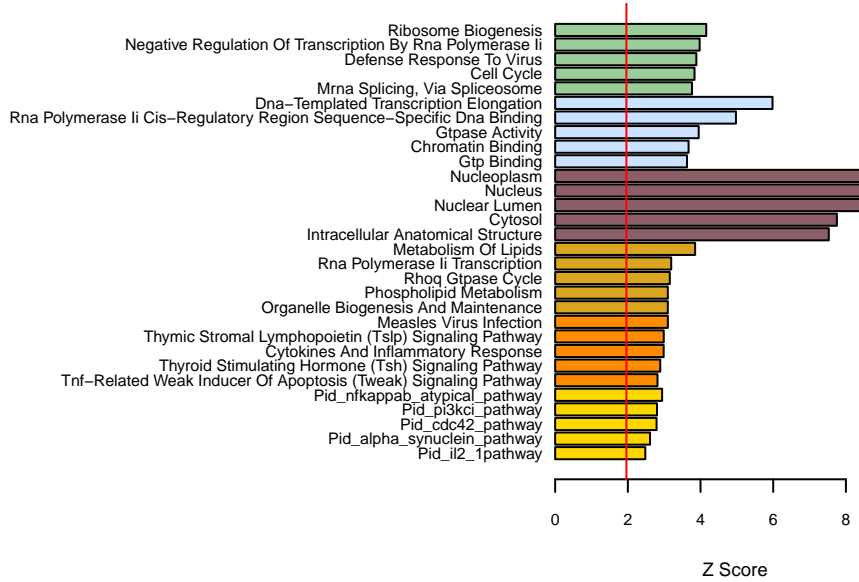

M2 blue

M3 brown

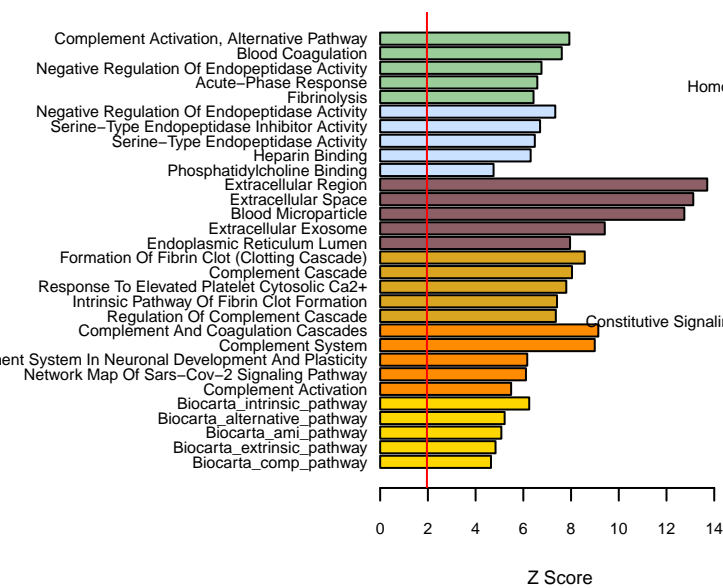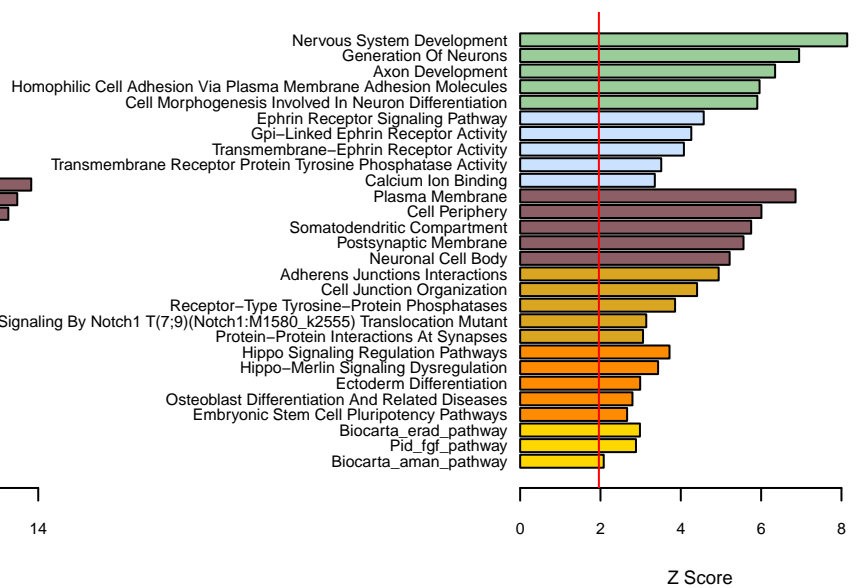

M4 yellow

M5 green

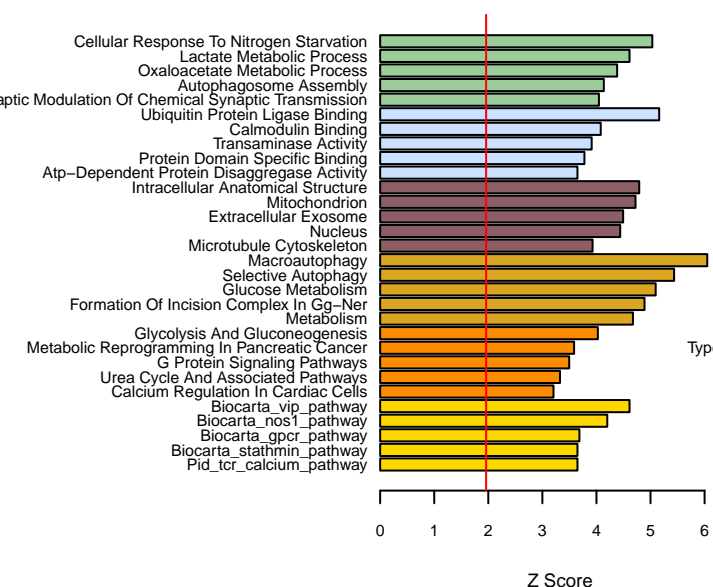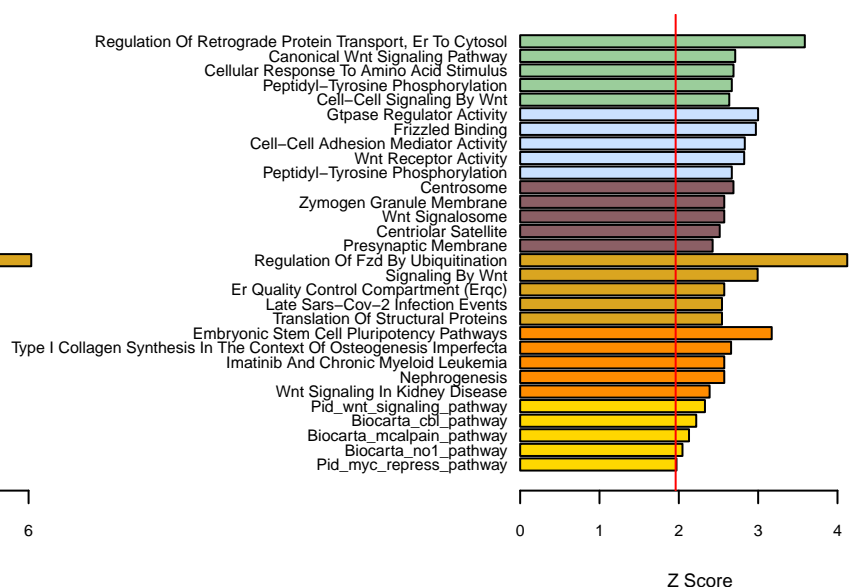

**M6 red**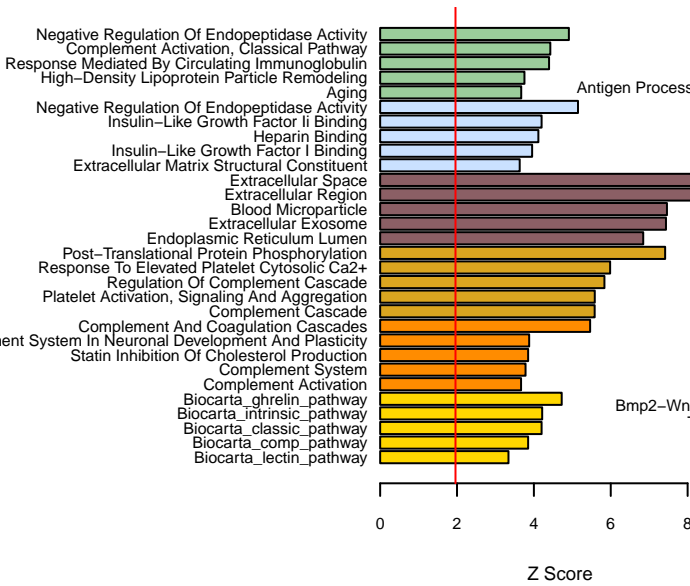**M7 black**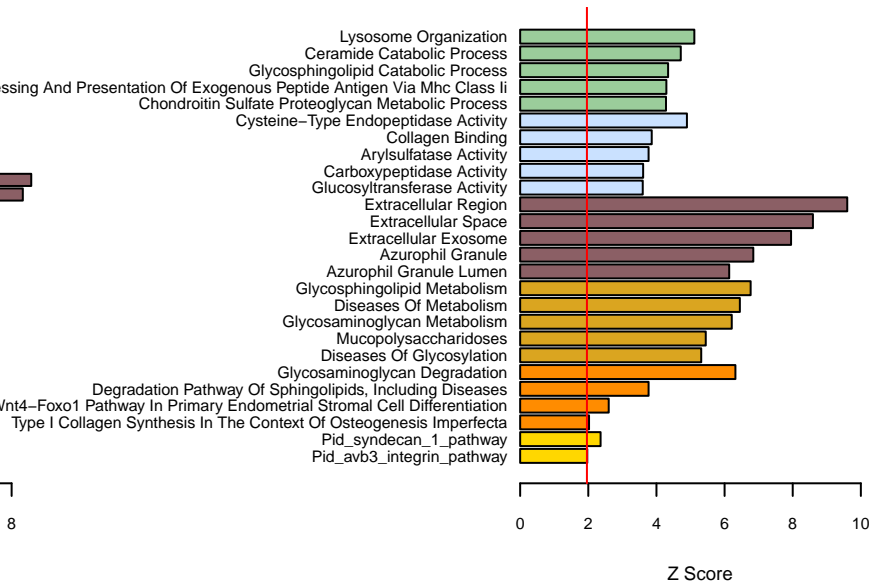**M8 pink**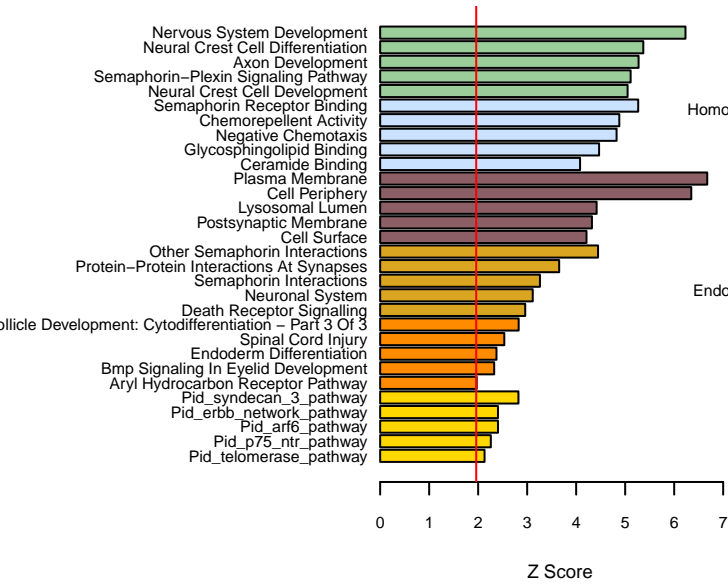**M9 magenta**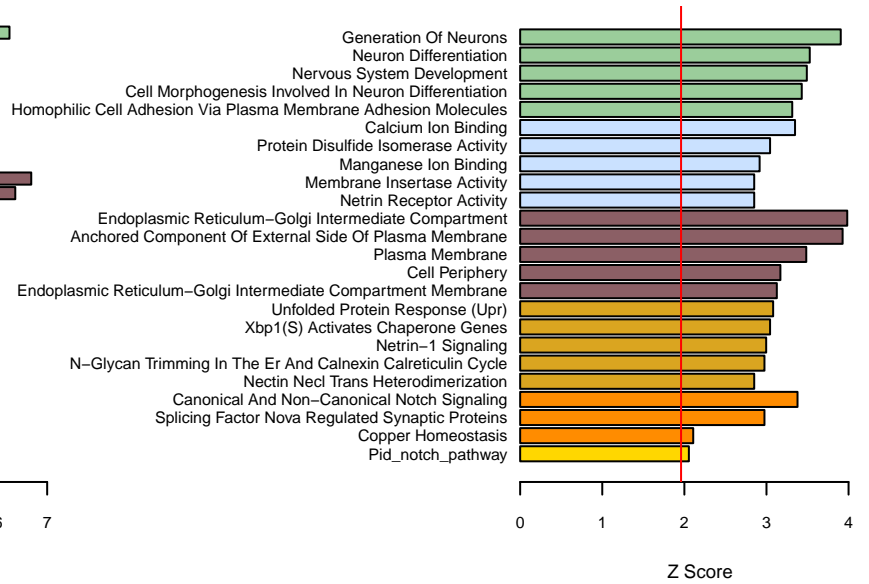**M10 purple**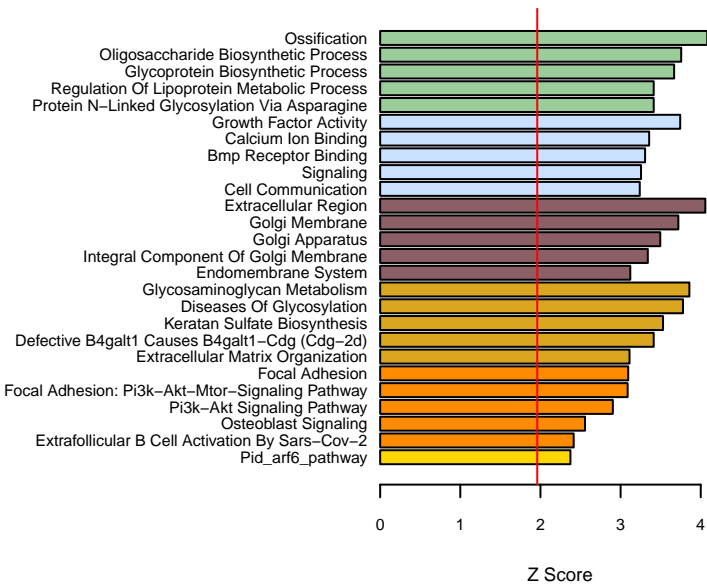**M11 greenyellow**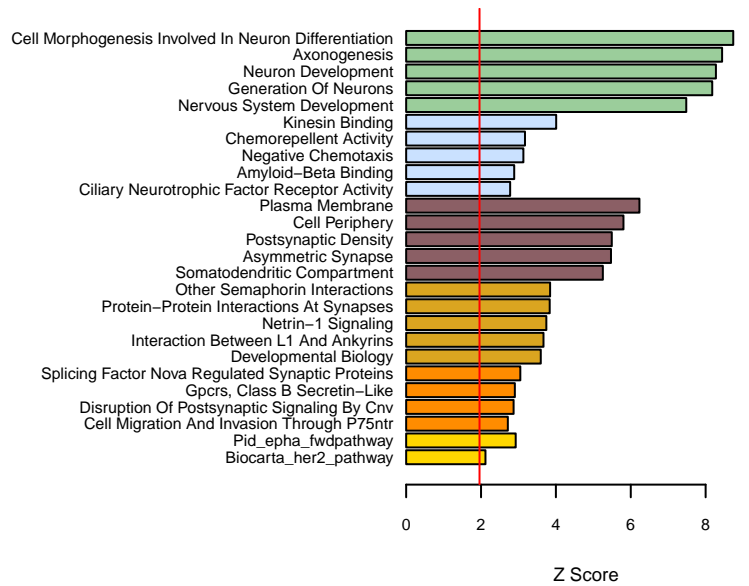

M12 tan

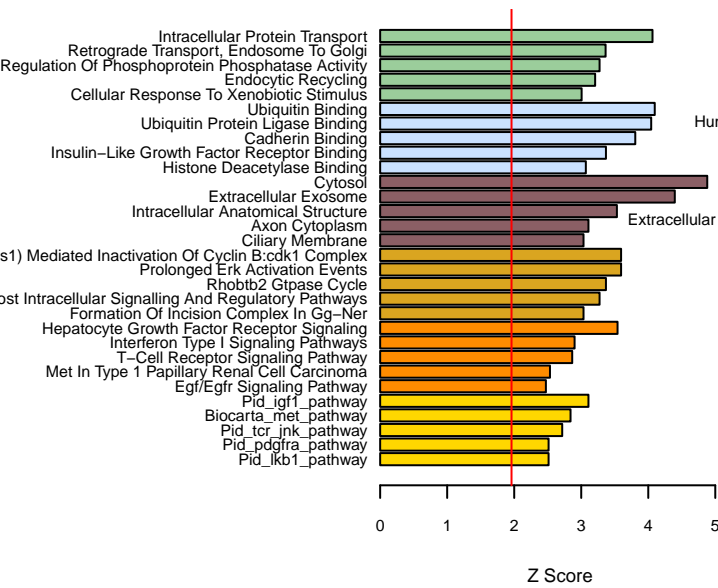

M13 salmon

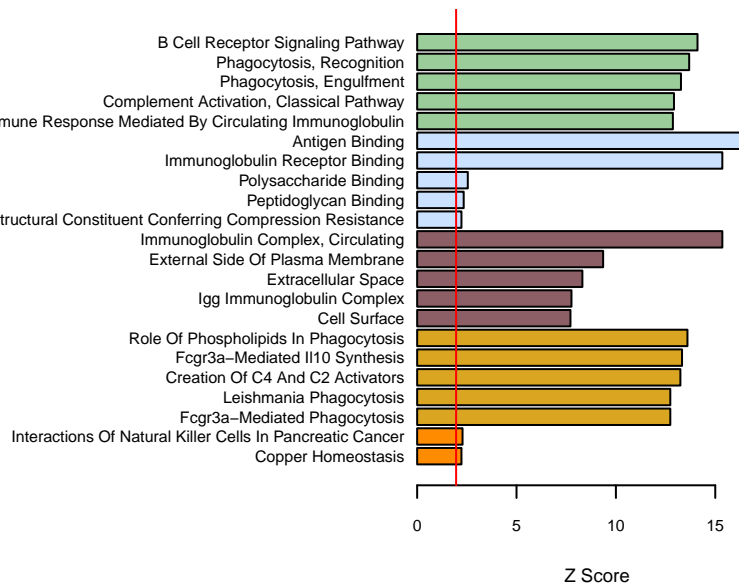

M14 cyan

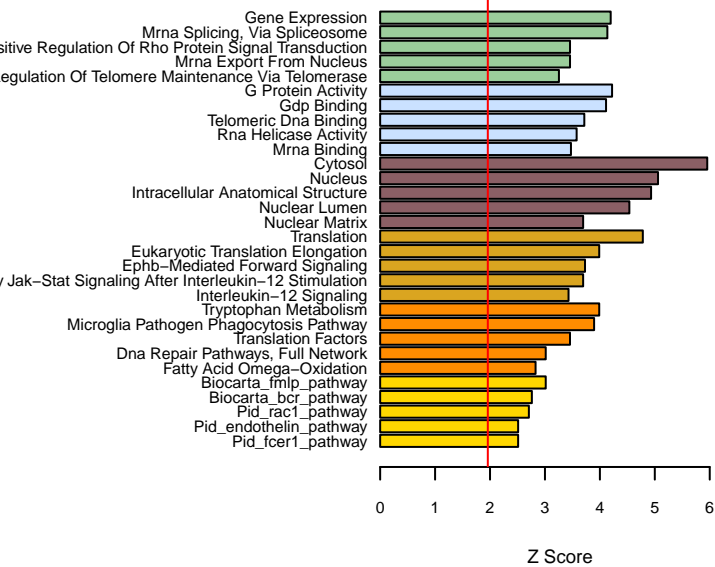

M15 midnightblue

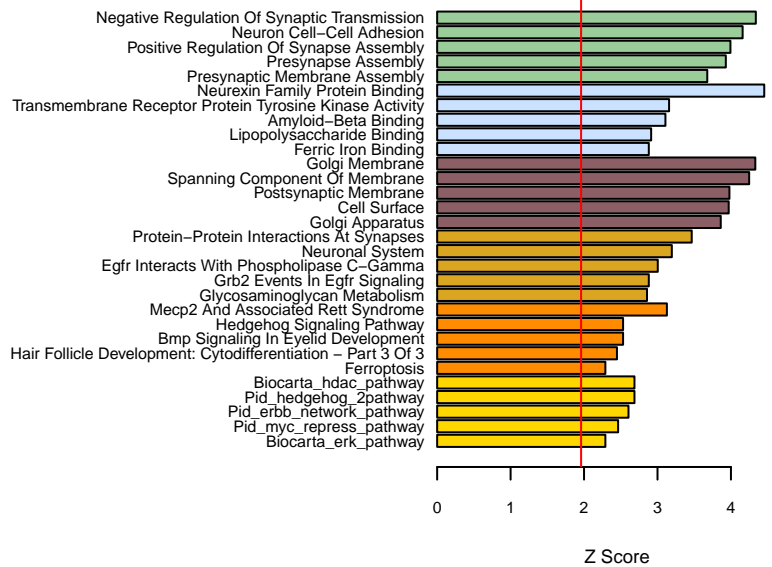

M16 lightcyan

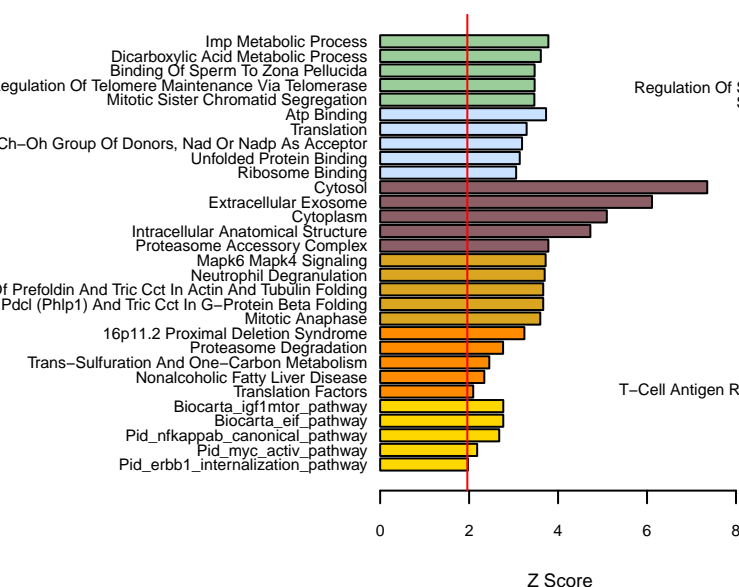

M17 grey60

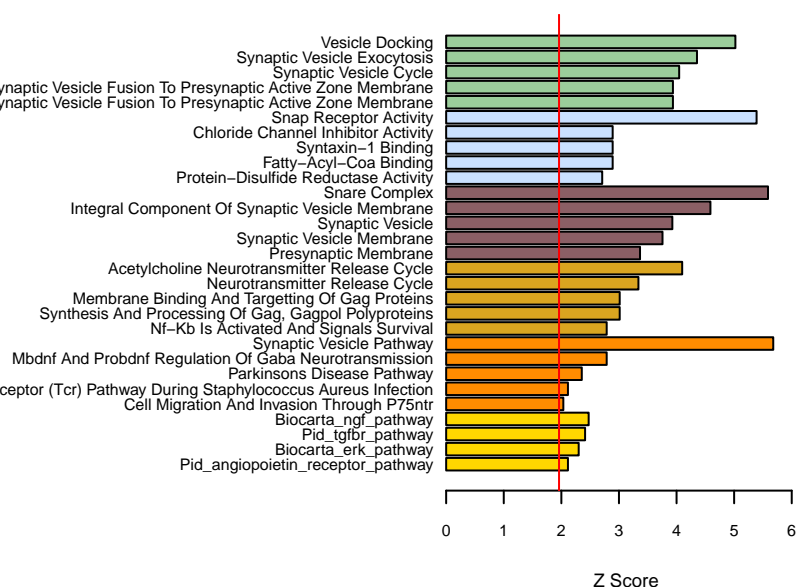

**M18 lightgreen**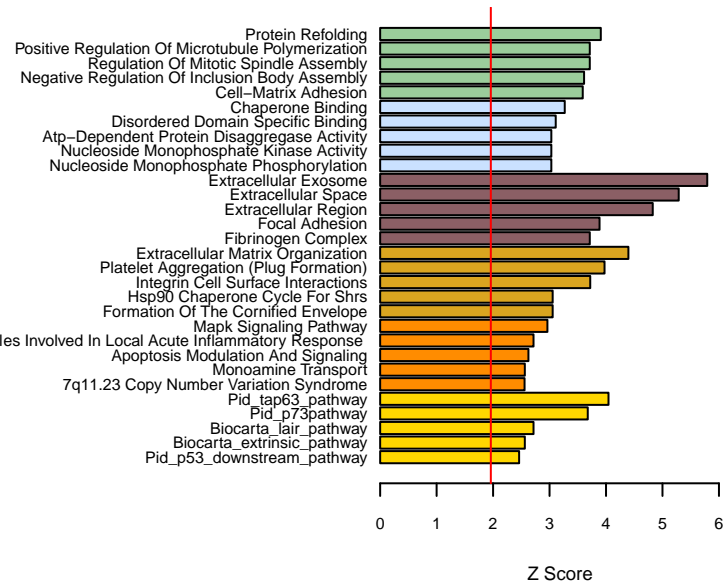**M19 lightyellow**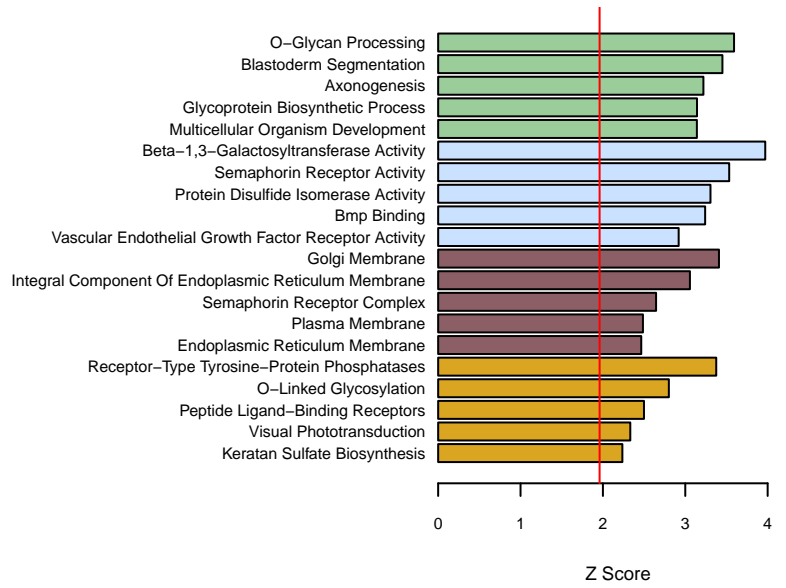**M20 royalblue**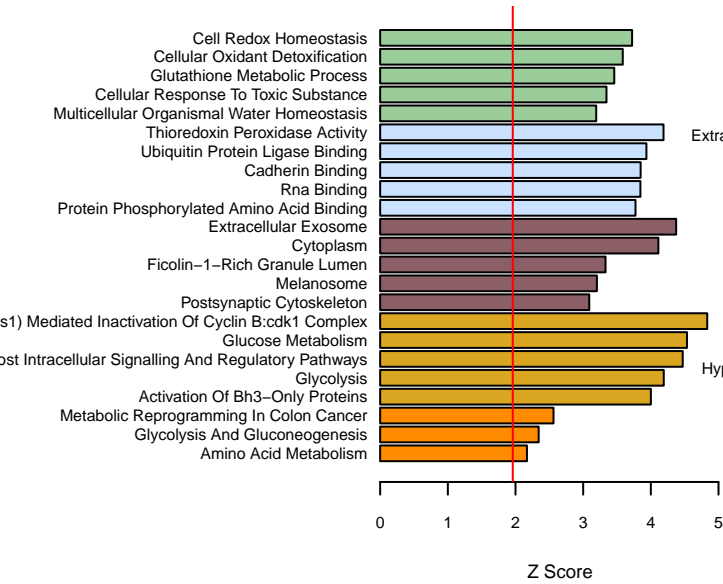**M21 darkred**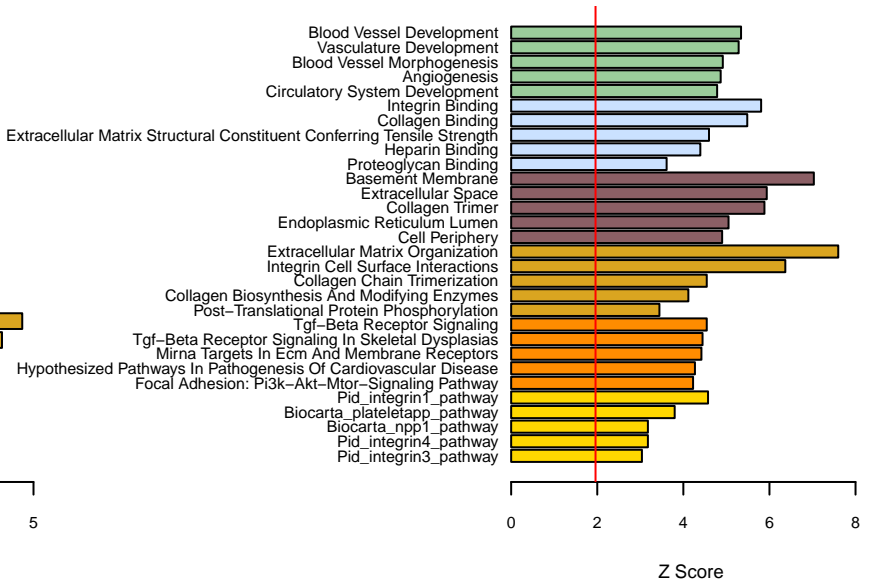**M22 darkgreen**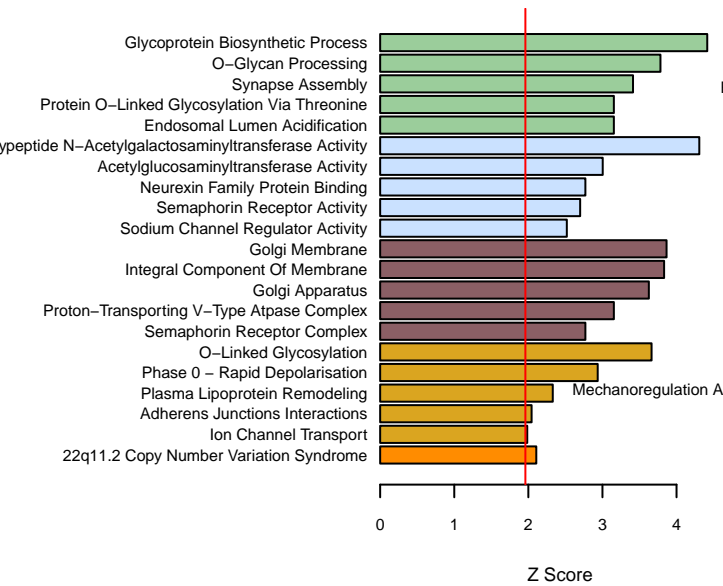**M23 darkturquoise**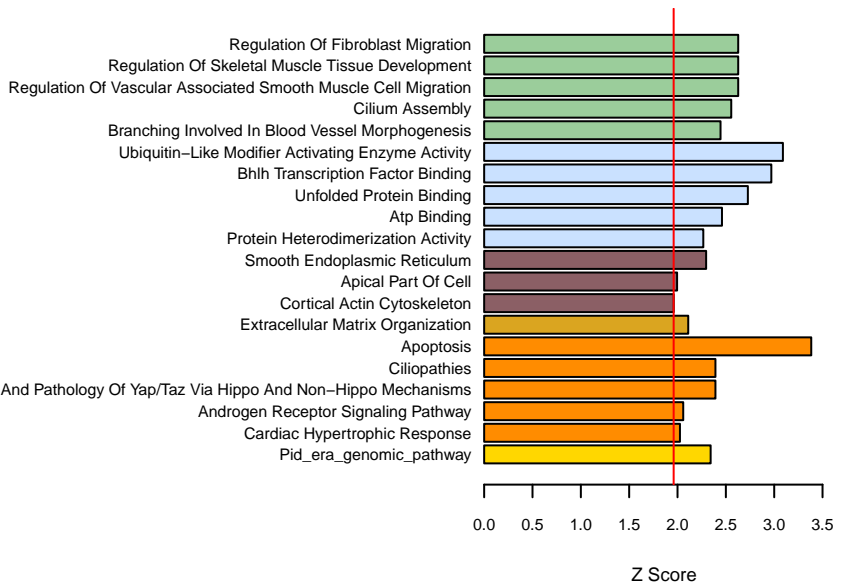

**M24 darkgrey**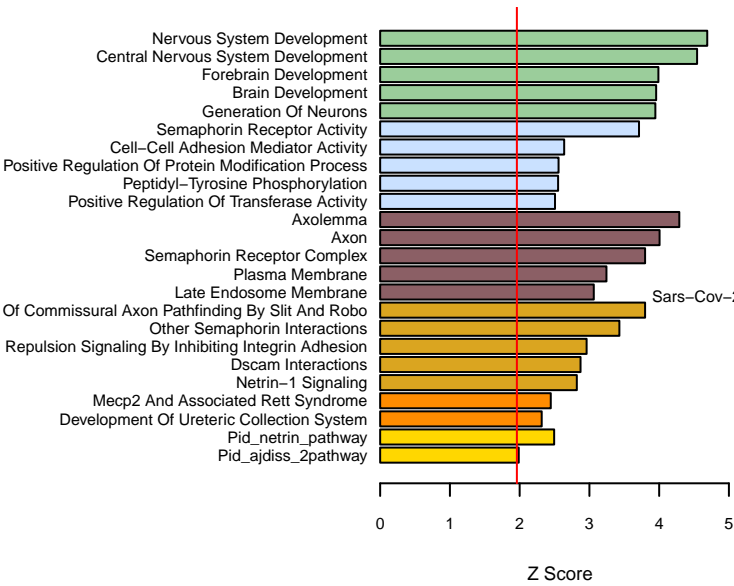**M25 orange**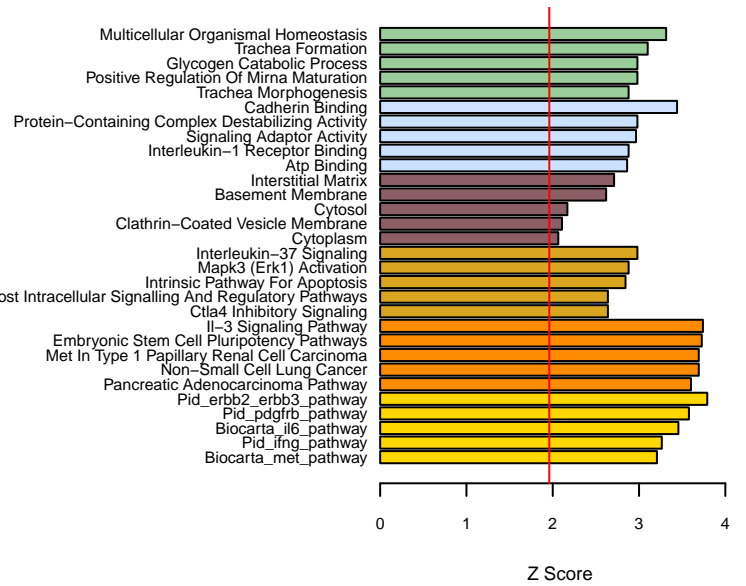**M26 darkorange**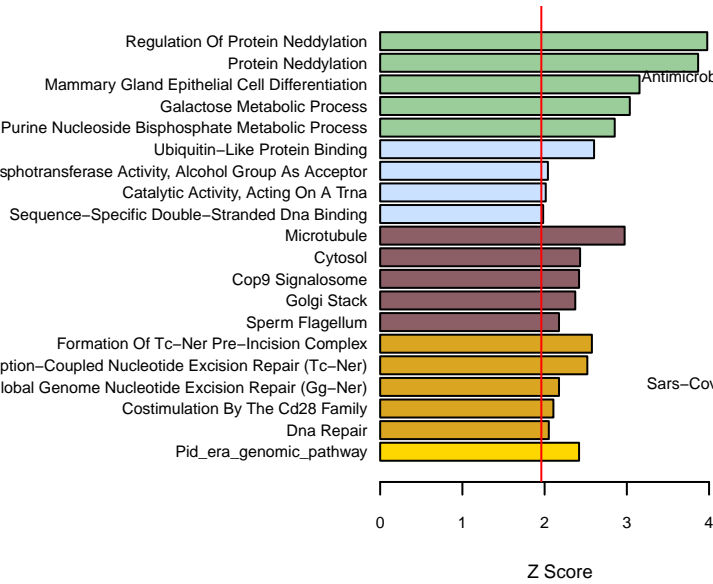**M27 white**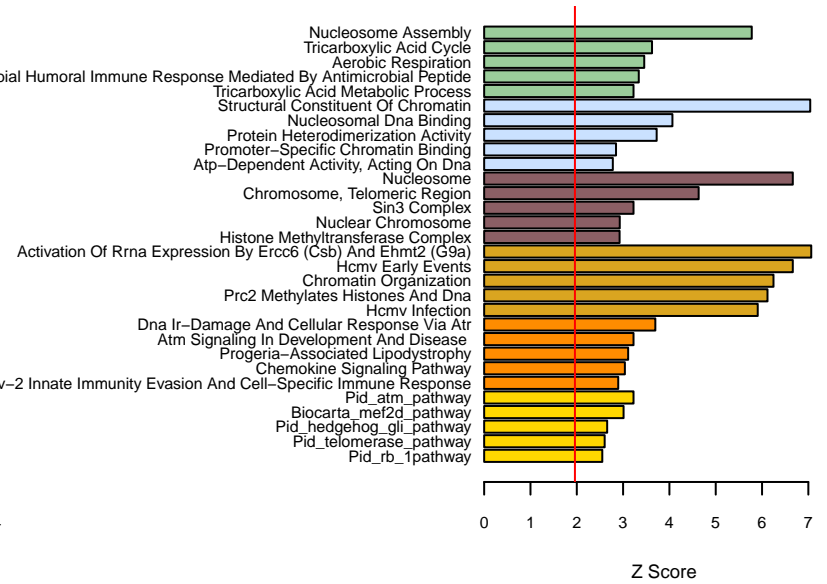**M28 skyblue**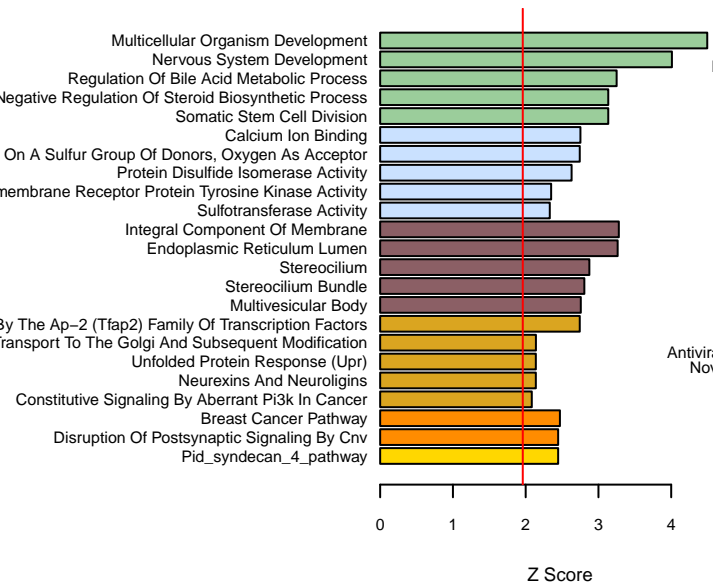**M29 saddlebrown**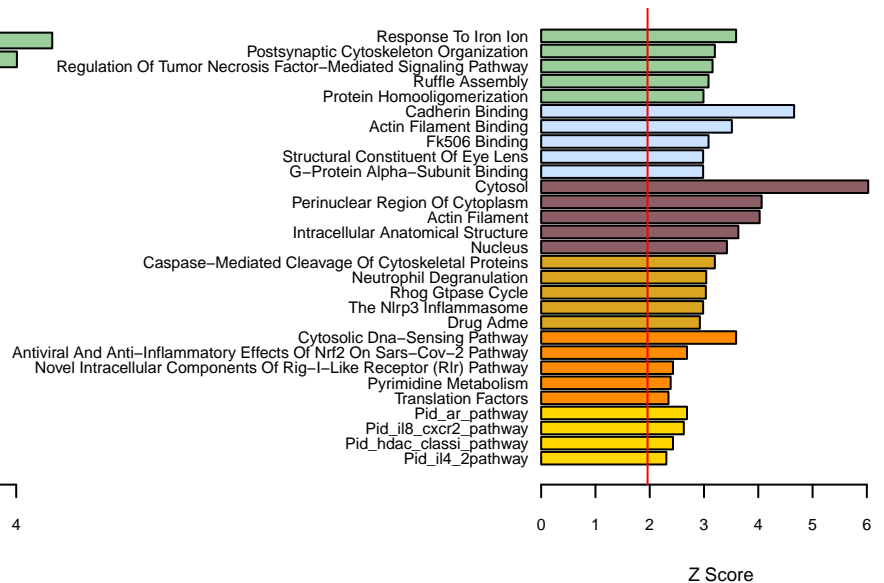

**M30 steelblue**

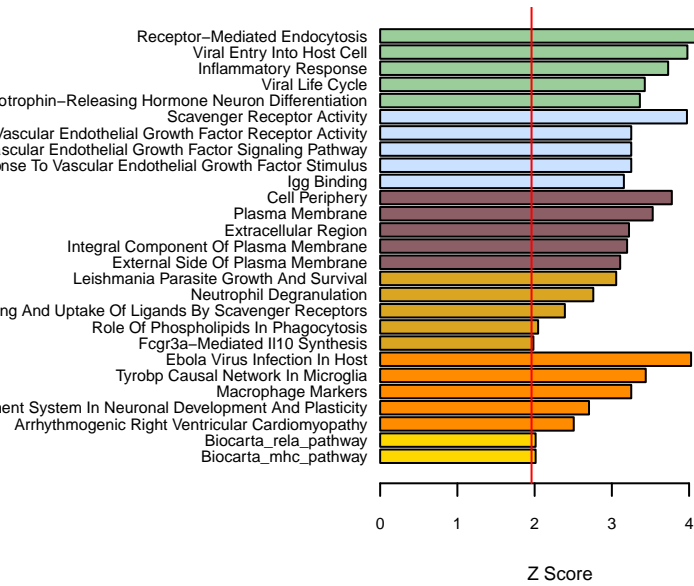

**M31 paleturquoise**

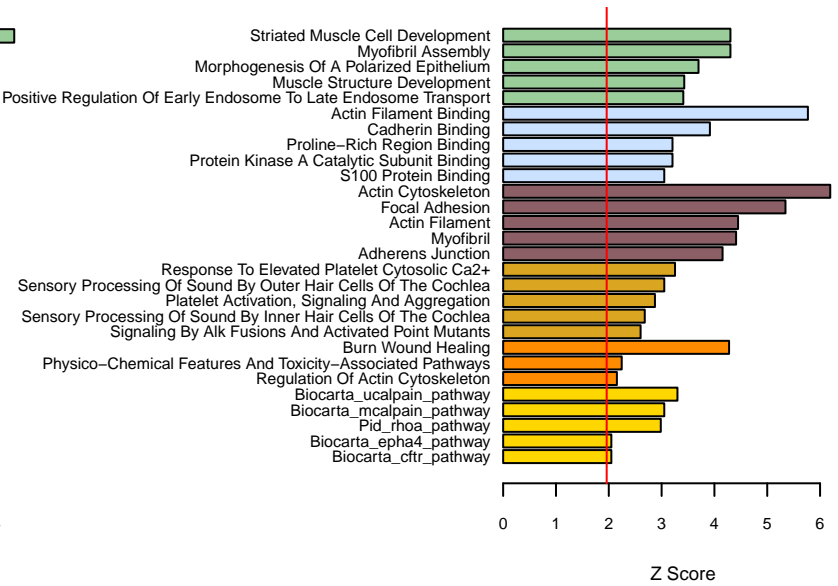

**M32 violet**

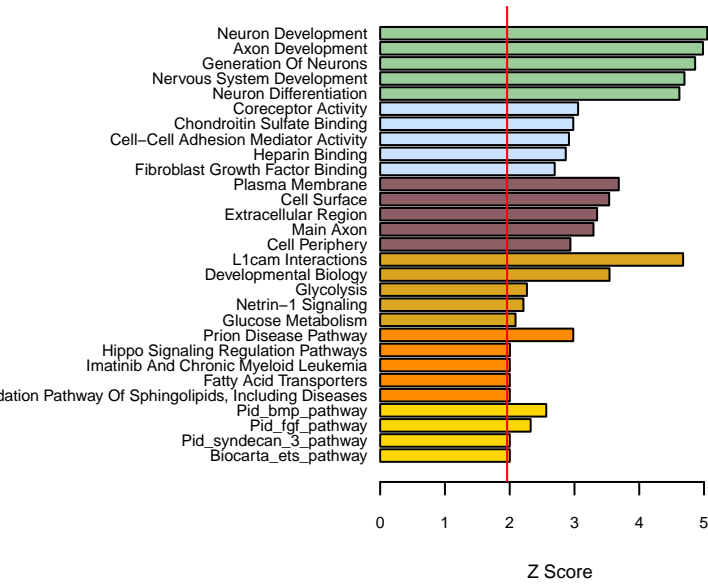

**M33 darkolivegreen**

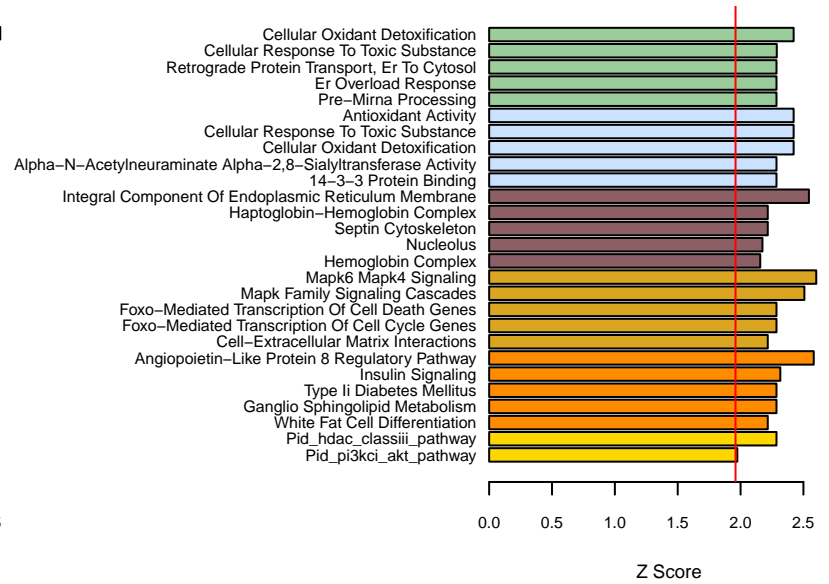

**M34 darkmagenta**

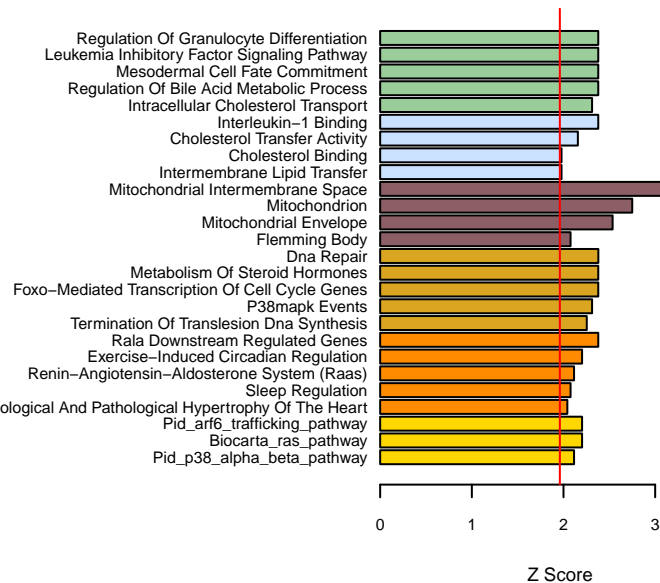

**M33 darkolivegreen.CSF34**  
Oxidant detoxification

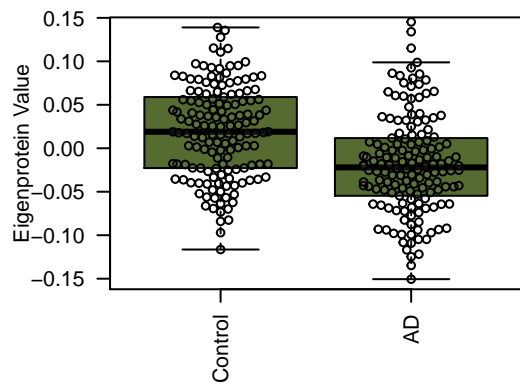

**MEdarkolivegreen.CSF 52 Pair SE**  
ANOVA p: 0.55

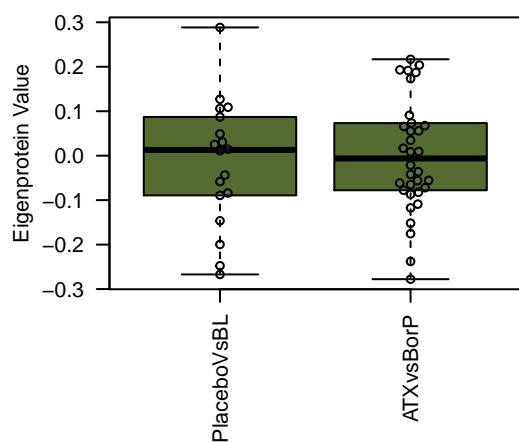

**MEdarkolivegreen.CSF 52 Pair SE**  
ANOVA p: 0.85

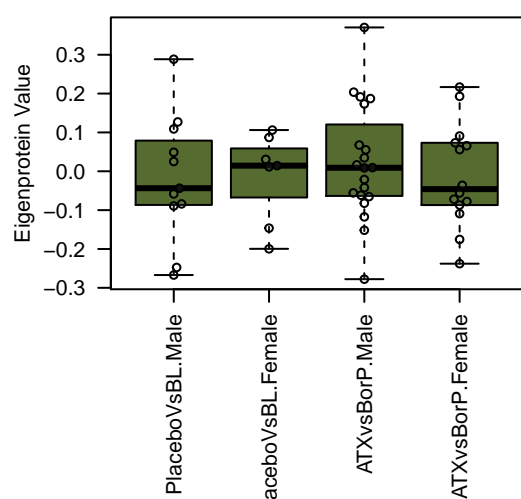

**bicor=-0.25, p=0.096**  
**cor=-0.3, p=0.04**

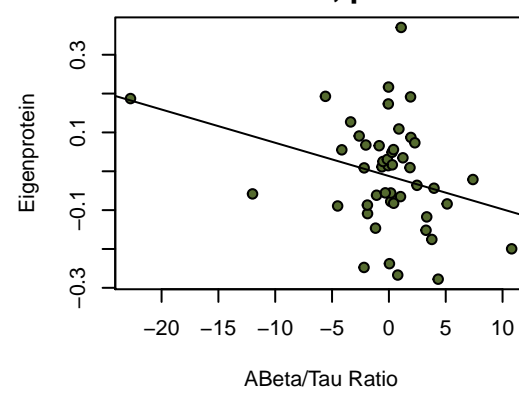

**bicor=0.27, p=0.056**  
**cor=0.26, p=0.063**

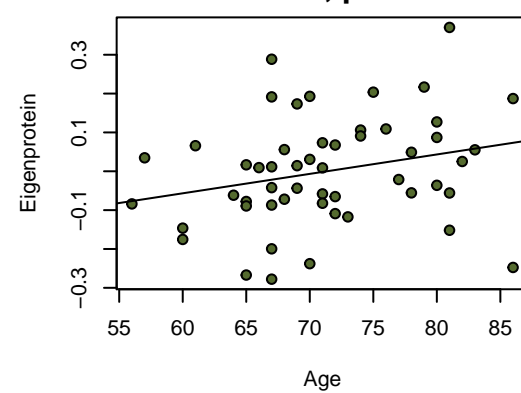

**M26 darkorange.CSF34**  
Neddylation

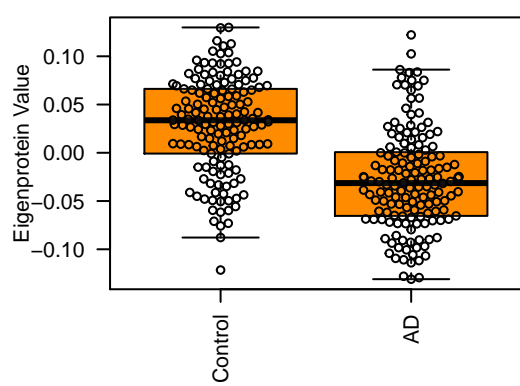

**MEdarkorange.CSF 52 Pair SE**  
ANOVA p: 0.36

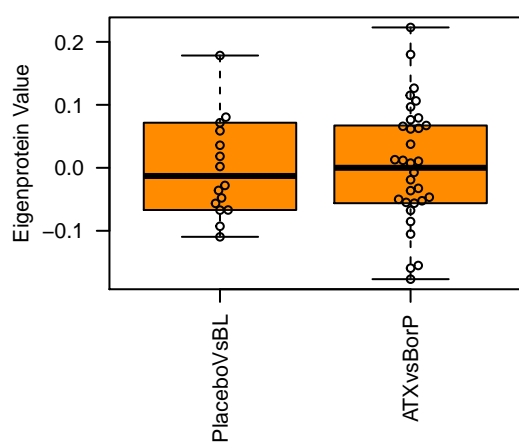

**MEdarkorange.CSF 52 Pair SE**  
ANOVA p: 0.53

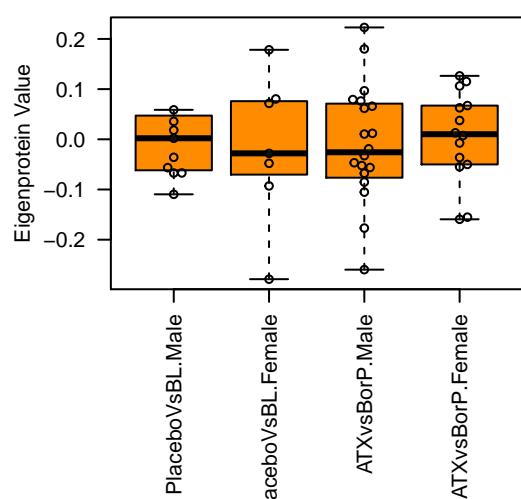

**bicor=0.093, p=0.53**  
**cor=0.32, p=0.028**

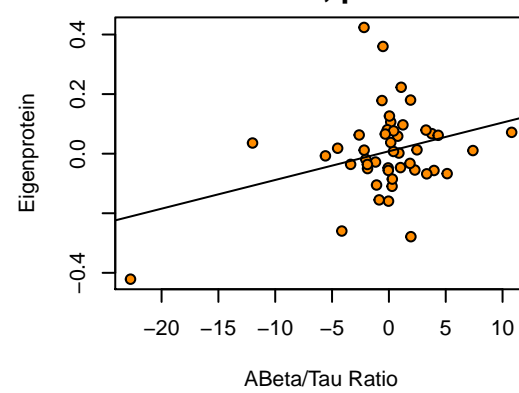

**bicor=-0.079, p=0.58**  
**cor=-0.029, p=0.84**

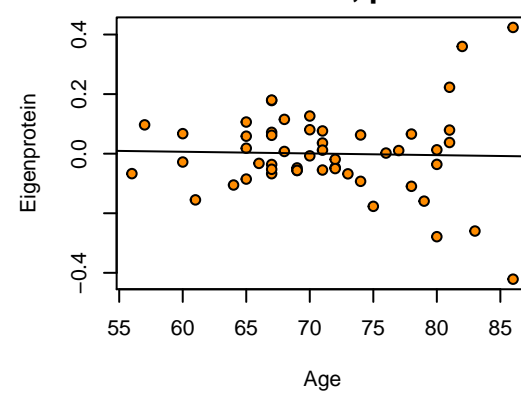

**M32 violet.CSF34**  
L1cam/Axon development

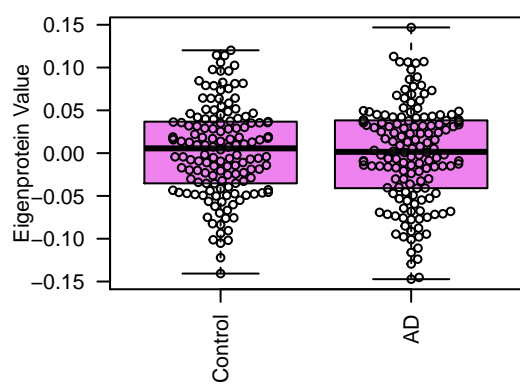

**MEviolet.CSF 52 Pair SE**  
ANOVA p: 0.51

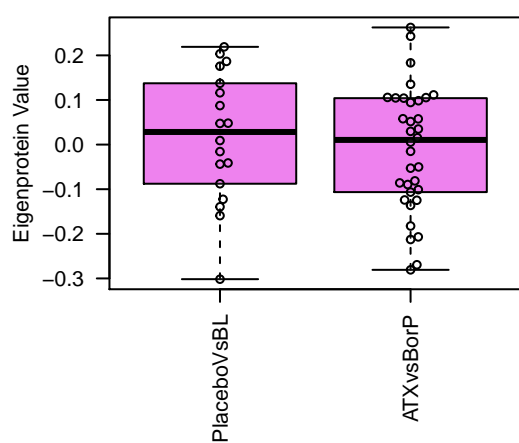

**MEviolet.CSF 52 Pair SE**  
ANOVA p: 0.89

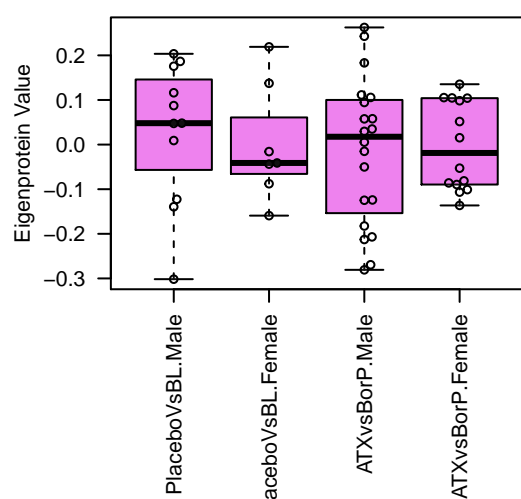

**bicor=0.24, p=0.11**  
**cor=0.34, p=0.019**

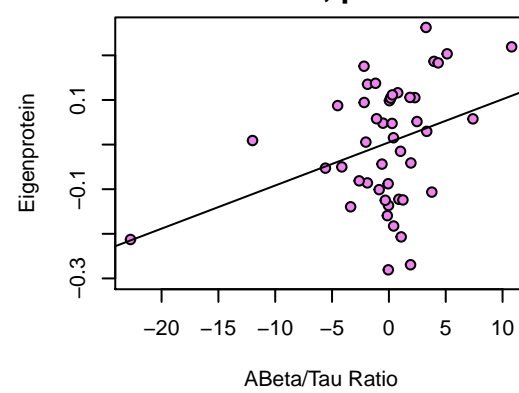

**bicor=-0.12, p=0.38**  
**cor=-0.1, p=0.48**

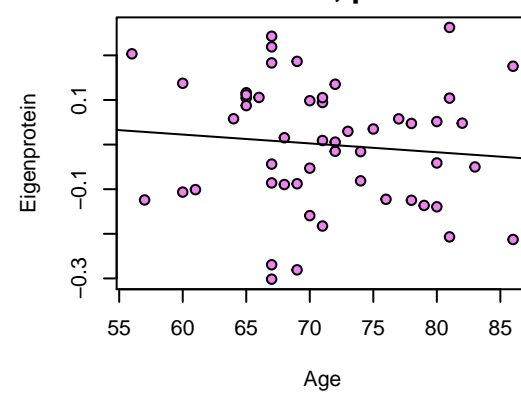

**M22 darkgreen.CSF34**  
Golgi/glycosylation

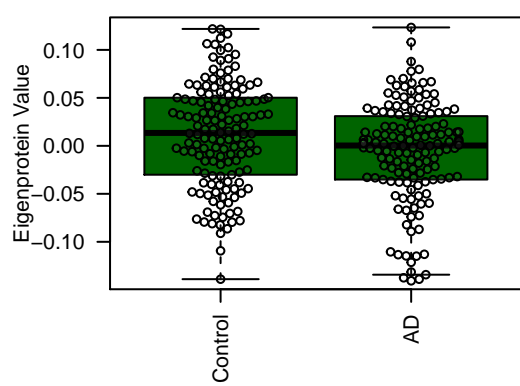

**MEdarkgreen.CSF 52 Pair SE**  
ANOVA p: 0.79

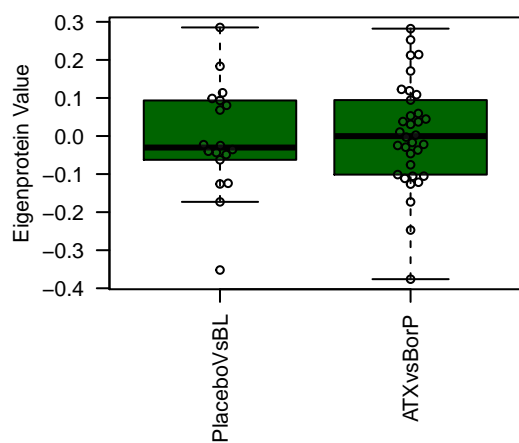

**MEdarkgreen.CSF 52 Pair SE**  
ANOVA p: 0.94

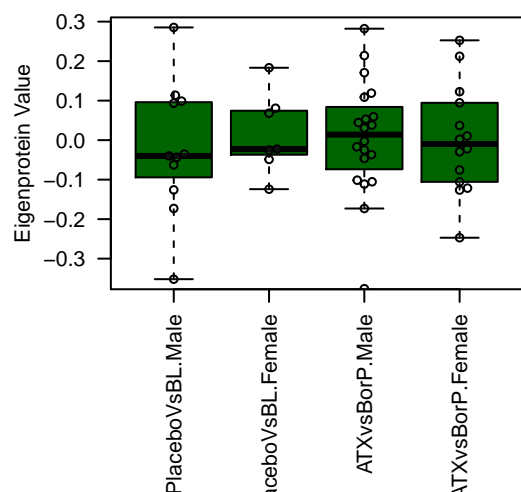

**bicor=-0.21, p=0.16**  
**cor=-0.33, p=0.023**

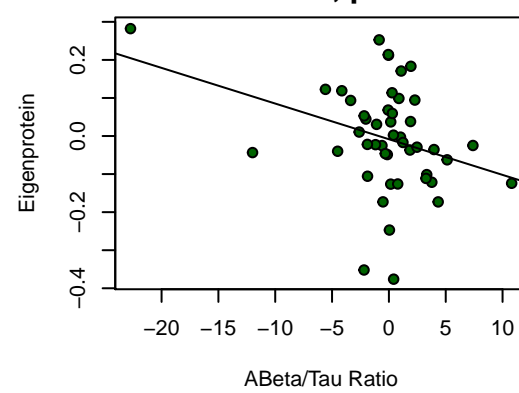

**bicor=0.19, p=0.17**  
**cor=0.13, p=0.36**

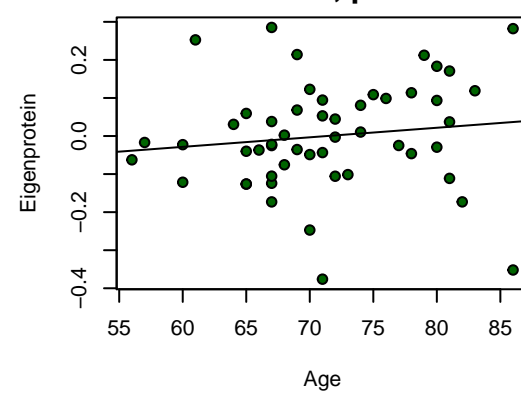

**M28 skyblue.CSF34**  
Nervous System Development

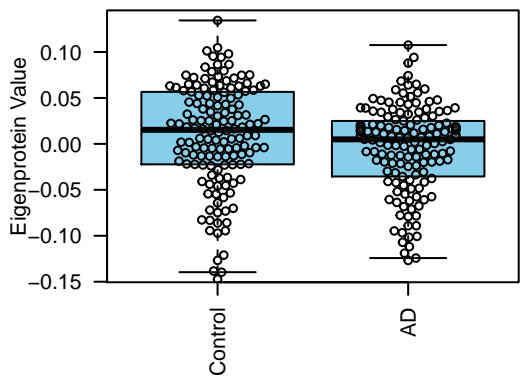

**MEskyblue.CSF 52 Pair SE**  
ANOVA p: 0.73

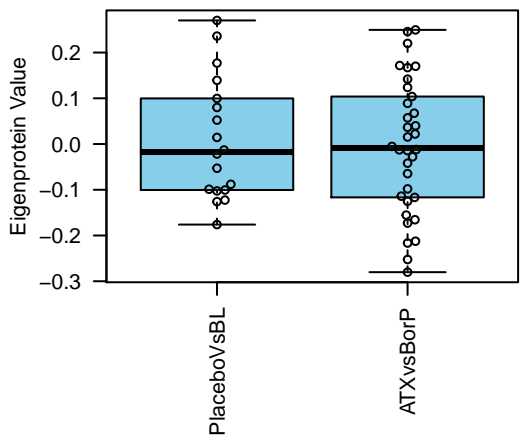

**MEskyblue.CSF 52 Pair SE**  
ANOVA p: 0.98

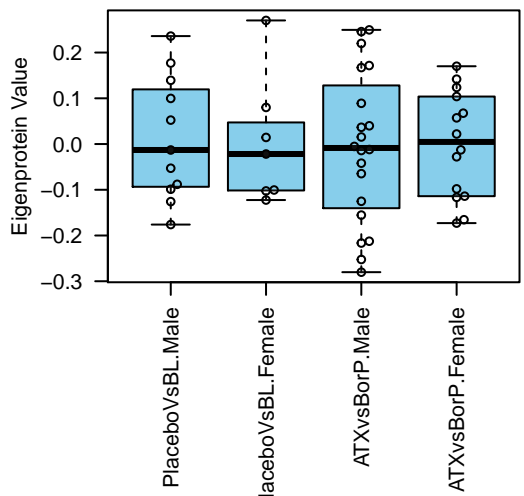

**bicor=0.21, p=0.15**  
**cor=0.2, p=0.18**

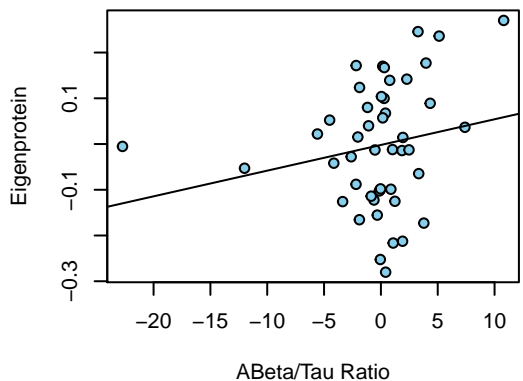

**bicor=-0.088, p=0.53**  
**cor=-0.1, p=0.48**

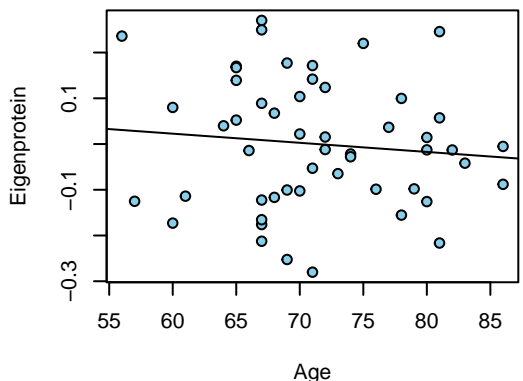

**M17 grey60.CSF34**  
Synaptic Vesicle/SNAP-SNARE Complex

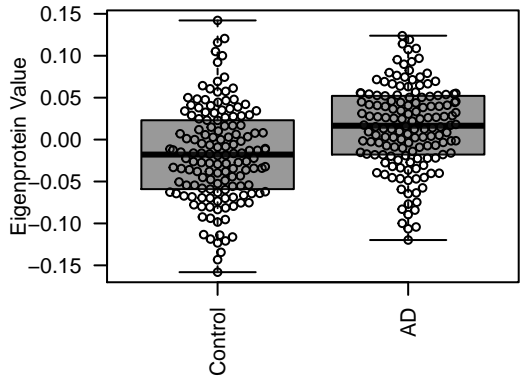

**MEgrey60.CSF 52 Pair SE**  
ANOVA p: 0.67

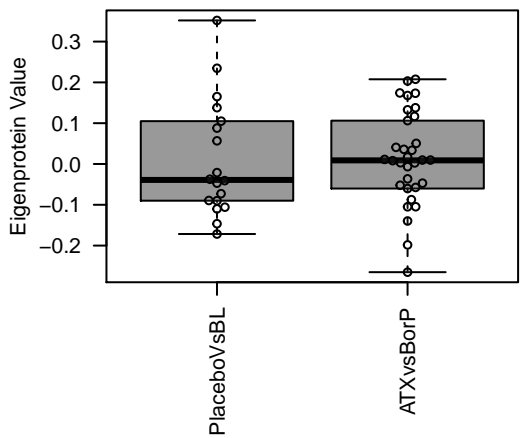

**MEgrey60.CSF 52 Pair SE**  
ANOVA p: 0.95

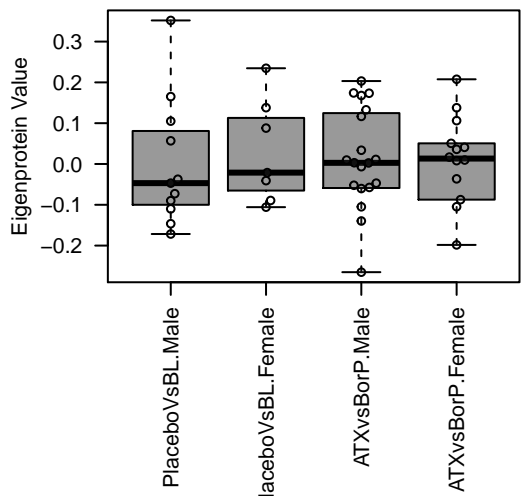

**bicor=-0.2, p=0.17**  
**cor=-0.26, p=0.078**

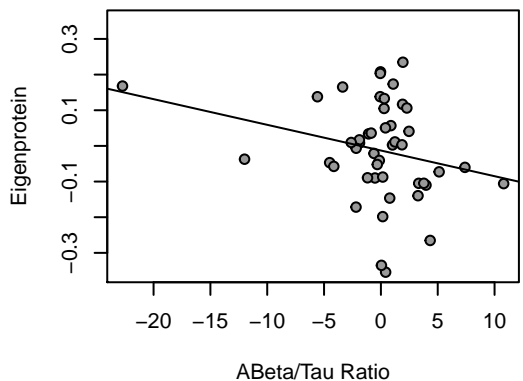

**bicor=0.18, p=0.21**  
**cor=0.16, p=0.26**

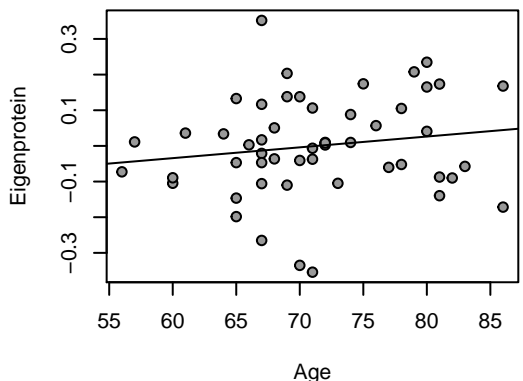

**M4 yellow.CSF34**  
Autophagy/Ubiquitination

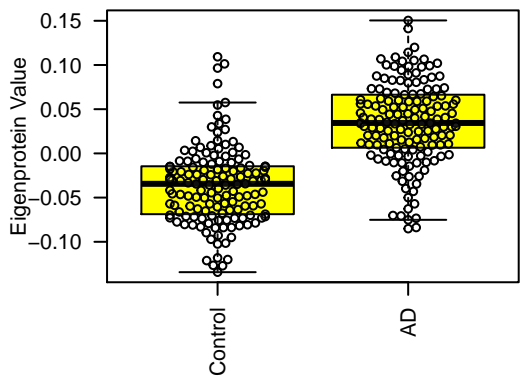

**MEyellow.CSF 52 Pair SE**  
ANOVA p: 0.6

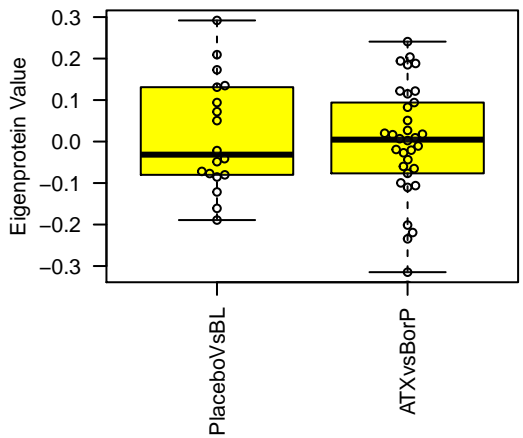

**MEyellow.CSF 52 Pair SE**  
ANOVA p: 0.94

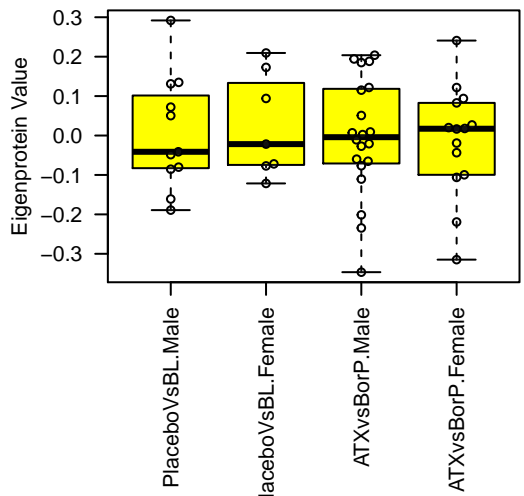

**bicor=-0.13, p=0.38**  
**cor=-0.24, p=0.1**

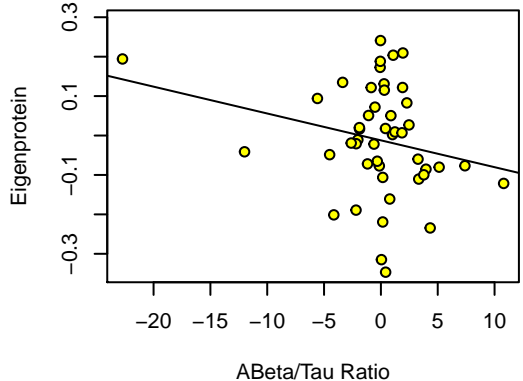

**bicor=0.18, p=0.21**  
**cor=0.16, p=0.26**

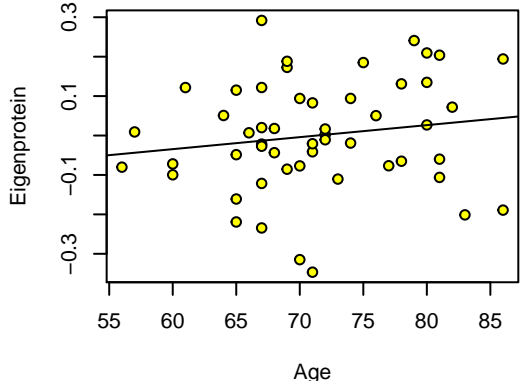

**M19 lightyellow.CSF34**  
Ambiguous

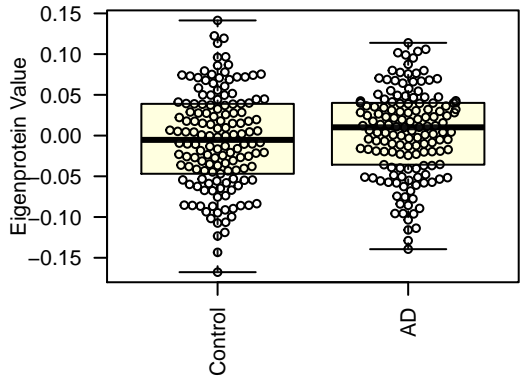

**MElightyellow.CSF 52 Pair SE**  
ANOVA p: 0.47

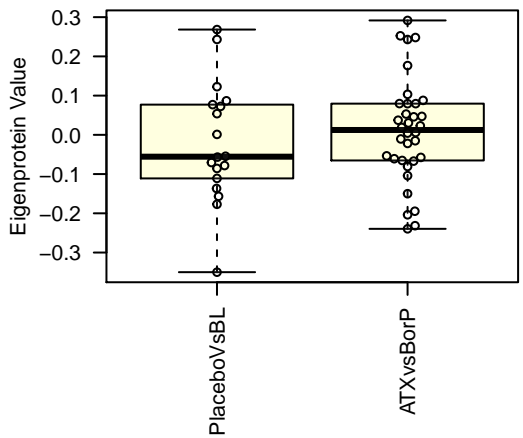

**MElightyellow.CSF 52 Pair SE**  
ANOVA p: 0.79

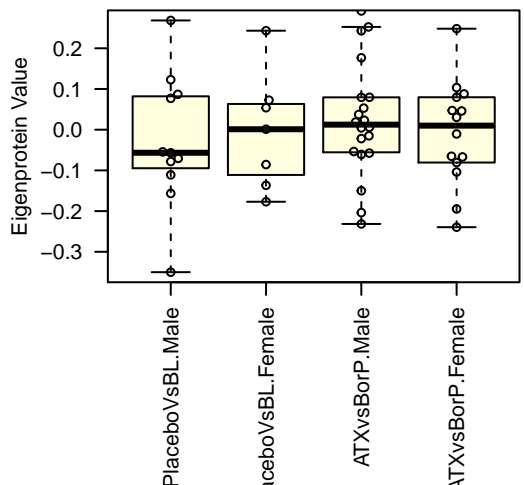

**bicor=-0.2, p=0.17**  
**cor=-0.34, p=0.019**

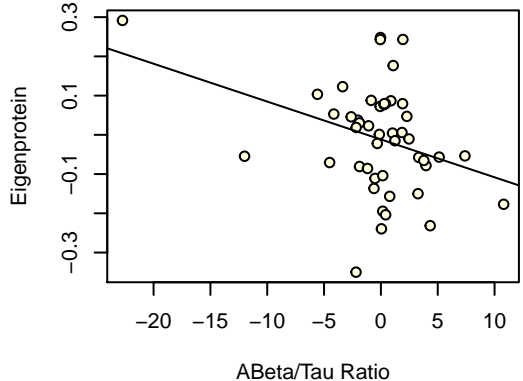

**bicor=0.21, p=0.13**  
**cor=0.17, p=0.23**

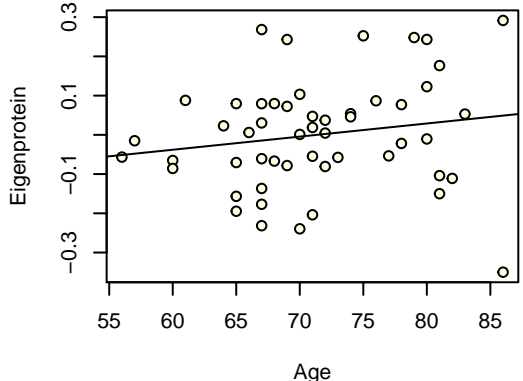



**M3 brown.CSF34**  
Neuron development

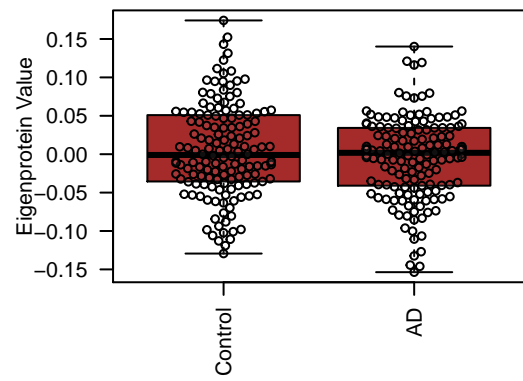

**MEbrown.CSF 52 Pair SE**  
ANOVA p: 0.93

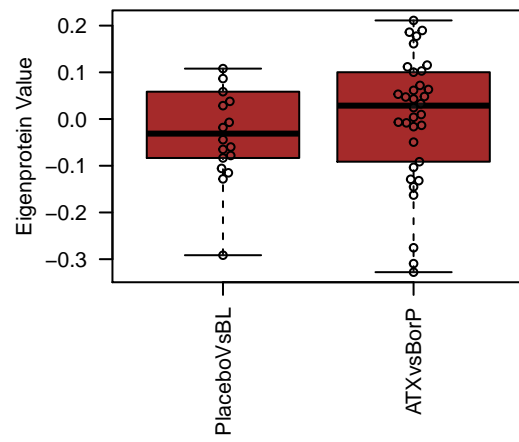

**MEbrown.CSF 52 Pair SE**  
ANOVA p: 0.47

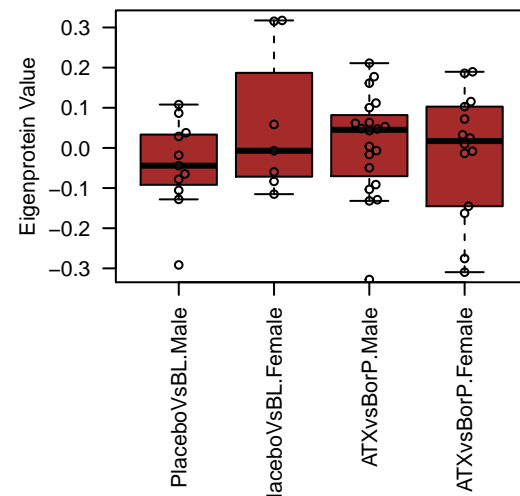

**bicor=-0.14, p=0.35**  
**cor=-0.21, p=0.16**

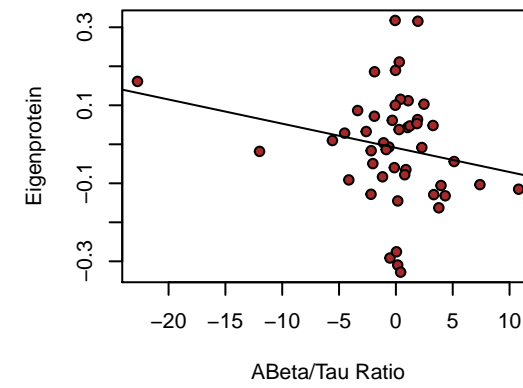

**bicor=0.13, p=0.37**  
**cor=0.11, p=0.44**

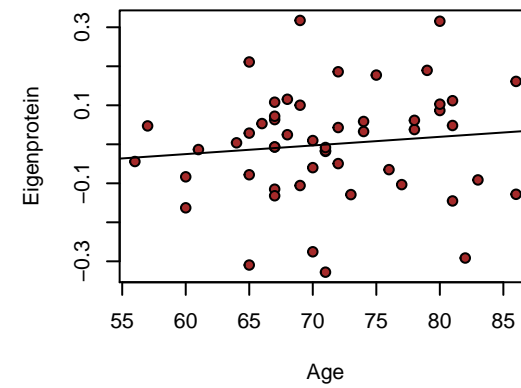

**M9 magenta.CSF34**  
Ambiguous

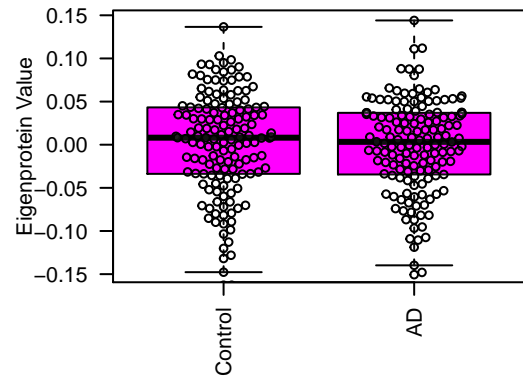

**MEMagenta.CSF 52 Pair SE**  
ANOVA p: 0.6

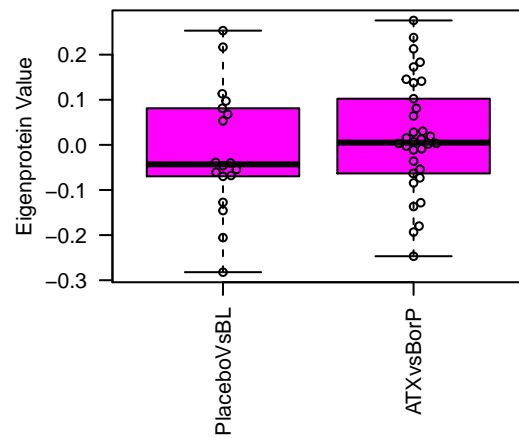

**MEMagenta.CSF 52 Pair SE**  
ANOVA p: 0.81

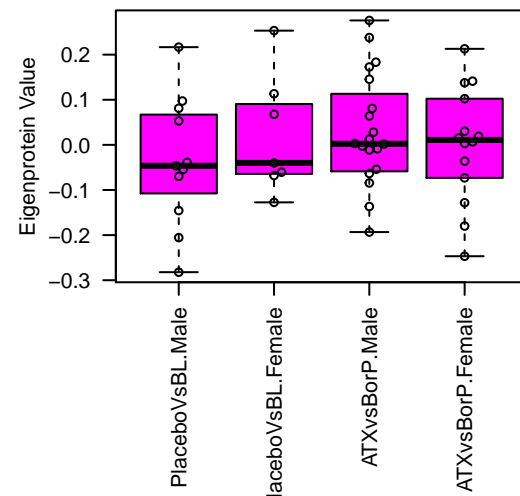

**bicor=-0.2, p=0.19**  
**cor=-0.31, p=0.034**

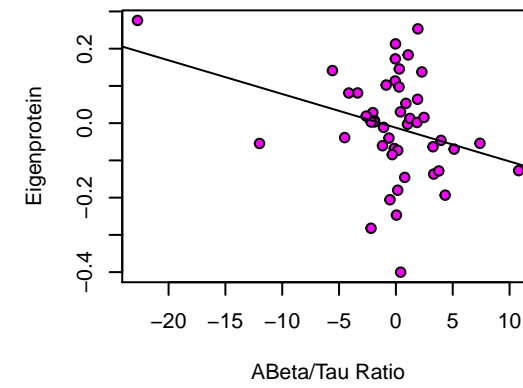

**bicor=0.19, p=0.18**  
**cor=0.16, p=0.26**

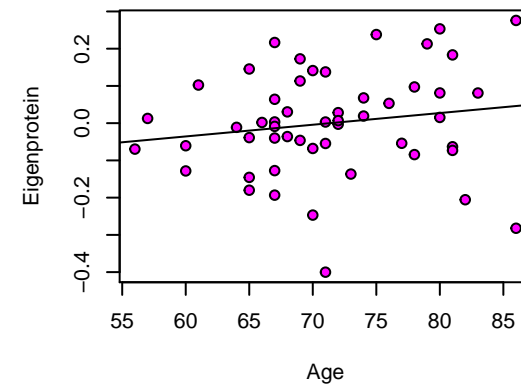

**M8 pink.CSF34**  
Semaphorin signaling

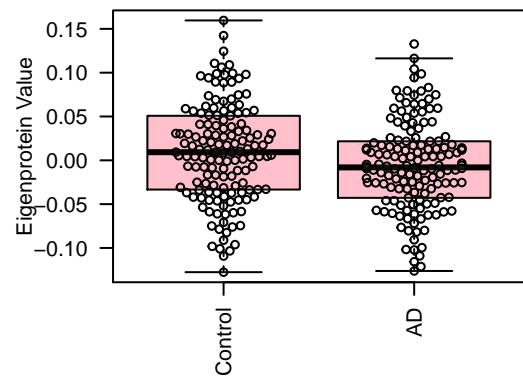

**MEpink.CSF 52 Pair SE**  
ANOVA p: 0.73

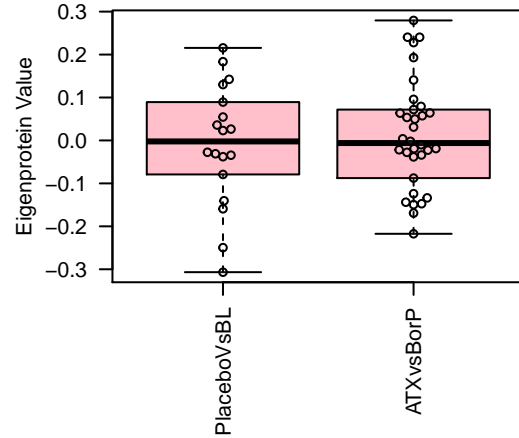

**MEpink.CSF 52 Pair SE**  
ANOVA p: 0.83

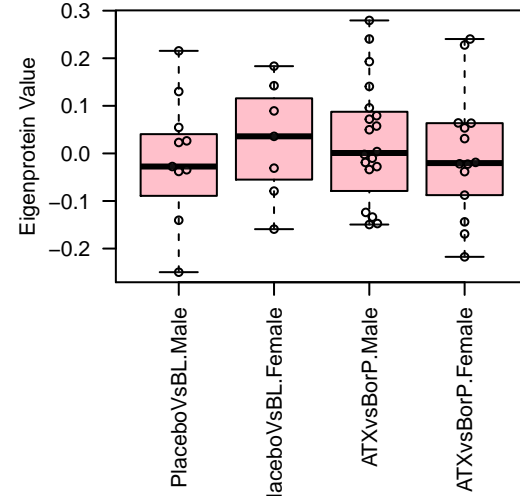

**bicor=-0.17, p=0.25**  
**cor=-0.33, p=0.023**

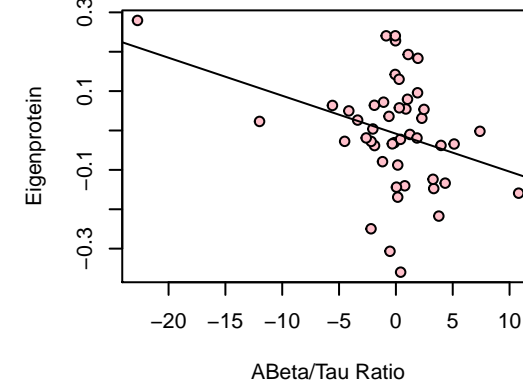

**bicor=0.15, p=0.3**  
**cor=0.11, p=0.44**

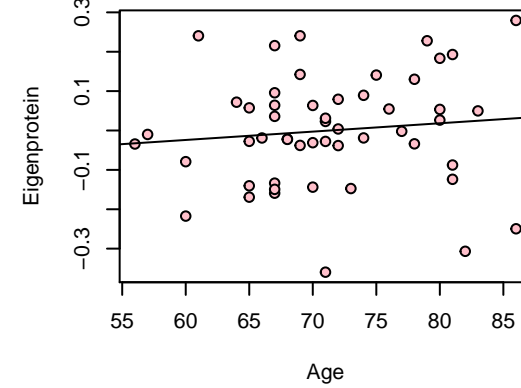

**M15 midnightblue.CSF34**  
Neurexin/Synaptic membrane

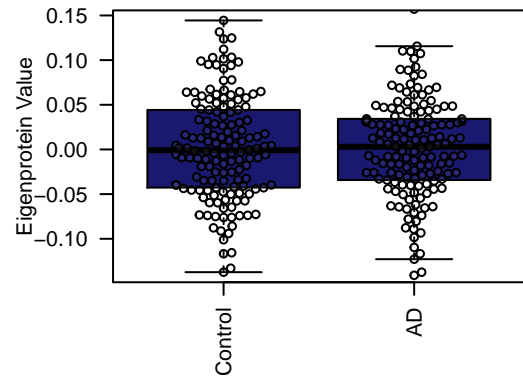

**MEMidnightblue.CSF 52 Pair SE**  
ANOVA p: 0.36

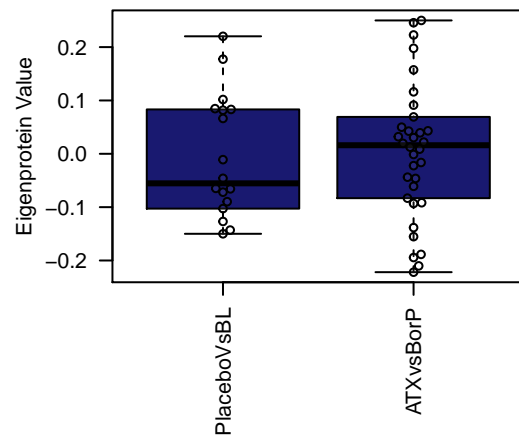

**MEMidnightblue.CSF 52 Pair SE**  
ANOVA p: 0.71

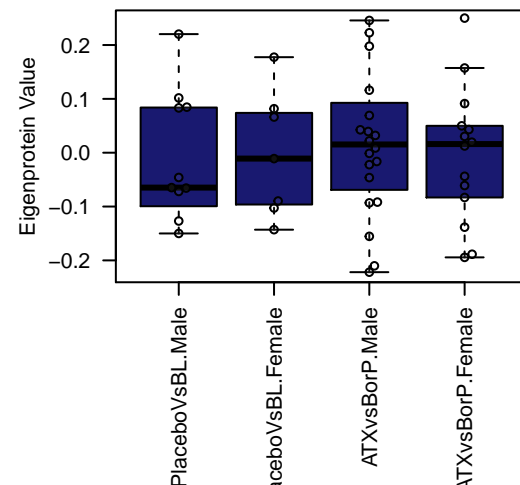

**bicor=-0.19, p=0.2**  
**cor=-0.37, p=0.01**

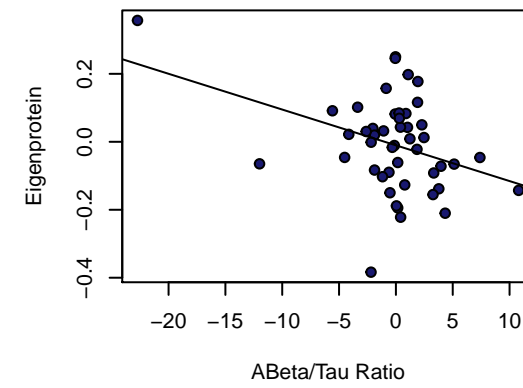

**bicor=0.2, p=0.16**  
**cor=0.16, p=0.26**

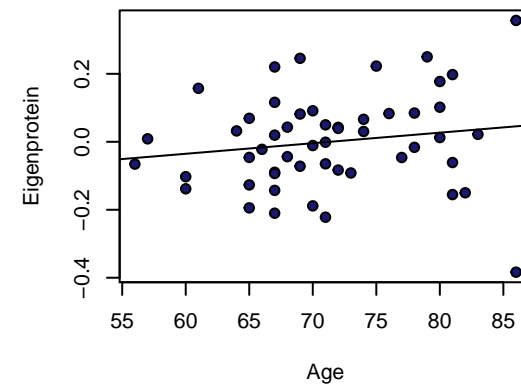

**M24 darkgrey.CSF34**  
**Axolemma/Semaphorin Complex**

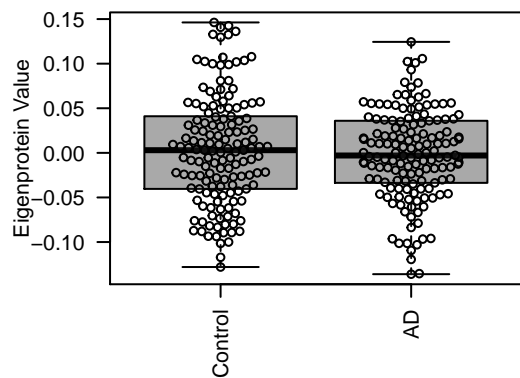

**MEdarkgrey.CSF 52 Pair SE**  
**ANOVA p: 0.72**

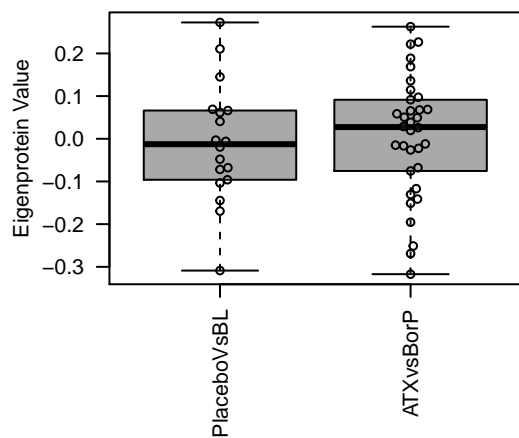

**MEdarkgrey.CSF 52 Pair SE**  
**ANOVA p: 0.88**

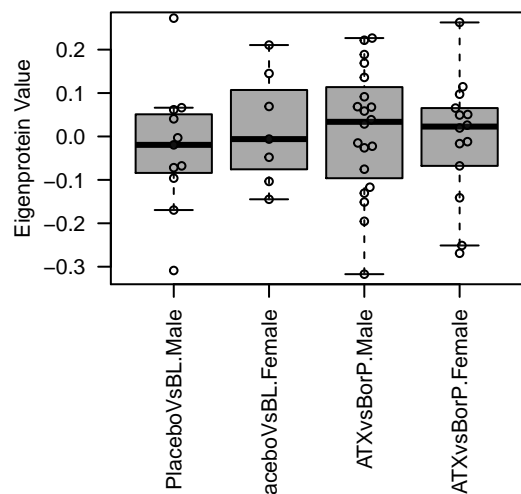

**bicor=-0.21, p=0.15**  
**cor=-0.27, p=0.066**

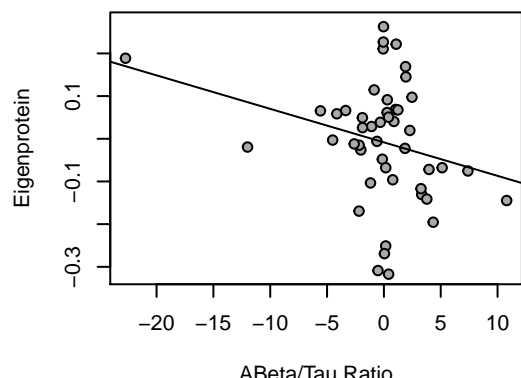

**bicor=0.15, p=0.29**  
**cor=0.12, p=0.4**

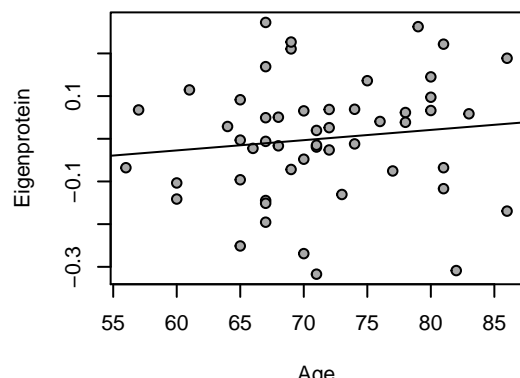

**M11 greenyellow.CSF34**  
**Neuron development**

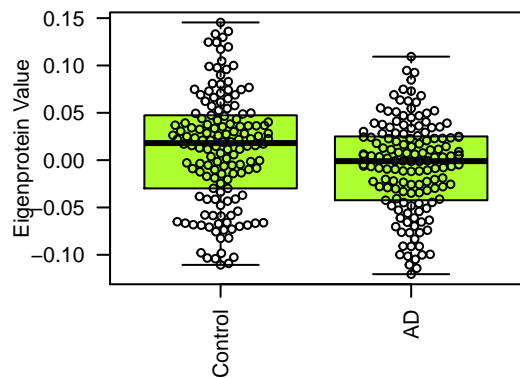

**MEgreenyellow.CSF 52 Pair SE**  
**ANOVA p: 0.95**

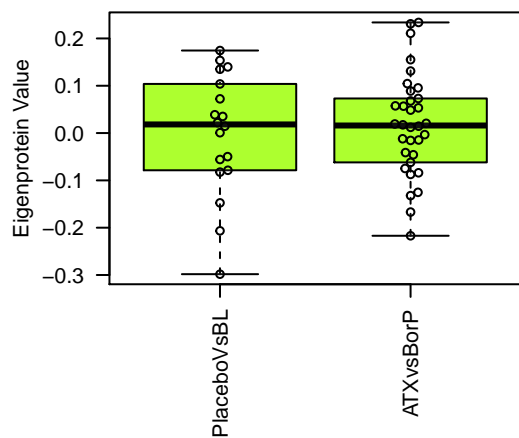

**MEgreenyellow.CSF 52 Pair SE**  
**ANOVA p: 0.83**

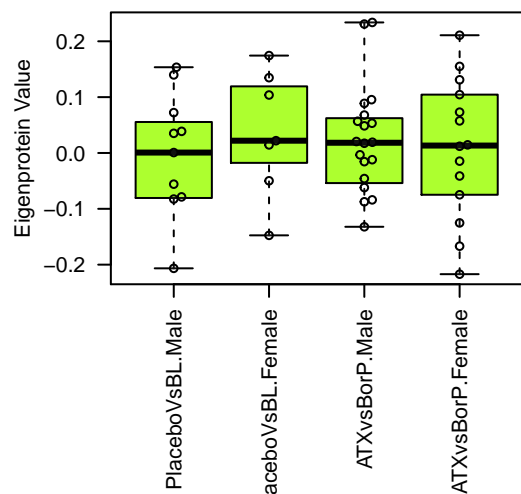

**bicor=-0.03, p=0.84**  
**cor=-0.2, p=0.18**

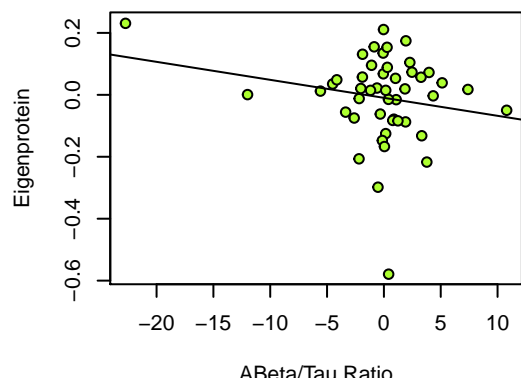

**bicor=0.11, p=0.45**  
**cor=0.073, p=0.61**

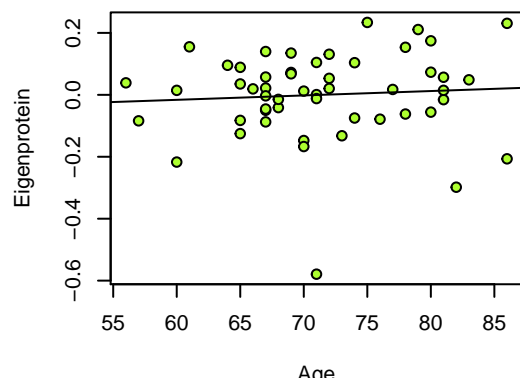

**M23 darkturquoise.CSF34**  
**Ambiguous**

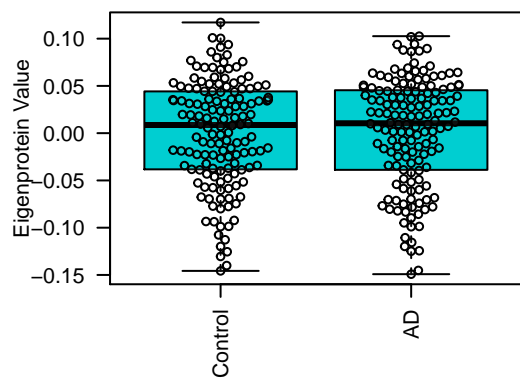

**MEdarkturquoise.CSF 52 Pair SE**  
**ANOVA p: 0.76**

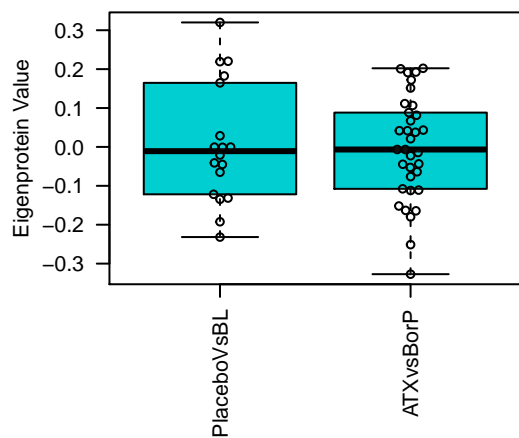

**MEdarkturquoise.CSF 52 Pair SE**  
**ANOVA p: 0.62**

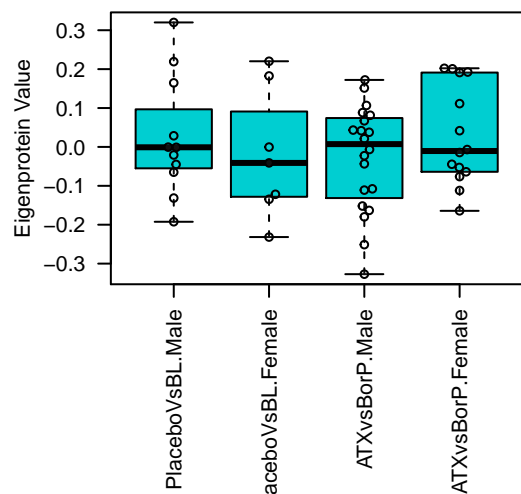

**bicor=-0.072, p=0.63**  
**cor=0.26, p=0.078**

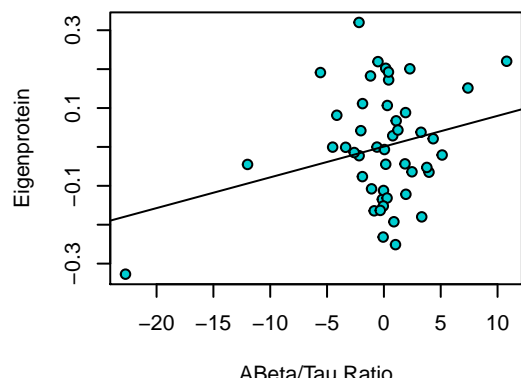

**bicor=-0.085, p=0.55**  
**cor=-0.071, p=0.62**

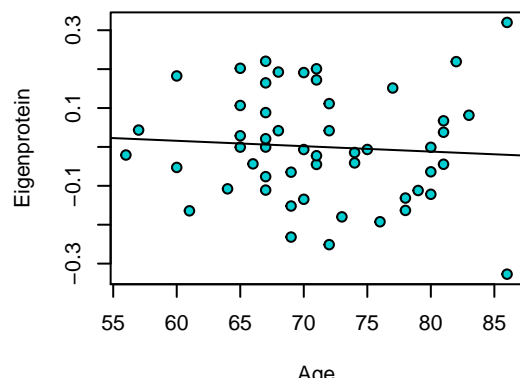

**M5 green.CSF34**  
**Wnt-Frizzled Signaling/Protein Transport**

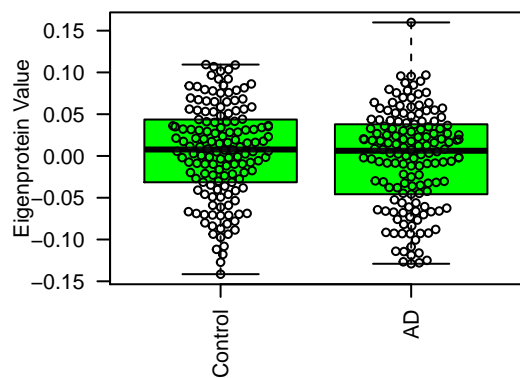

**MEgreen.CSF 52 Pair SE**  
**ANOVA p: 0.41**

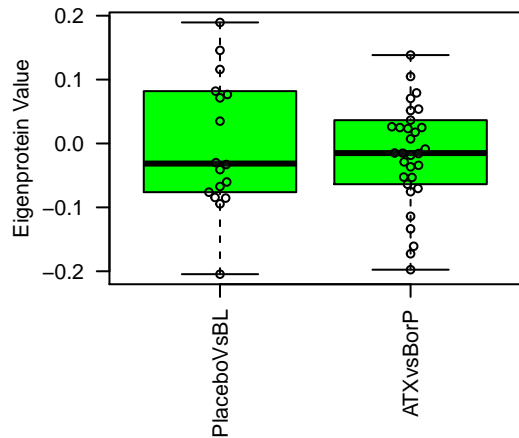

**MEgreen.CSF 52 Pair SE**  
**ANOVA p: 0.72**

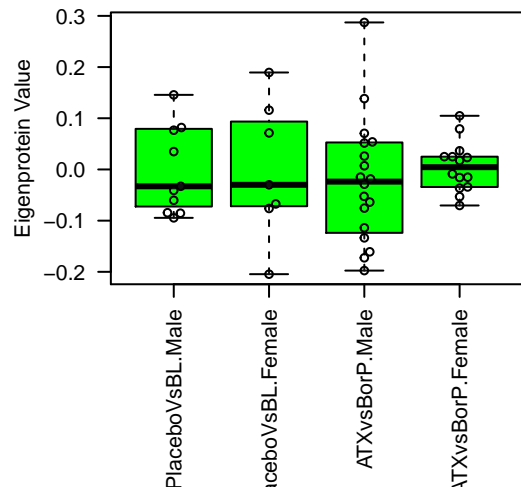

**bicor=-0.23, p=0.12**  
**cor=0.2, p=0.18**

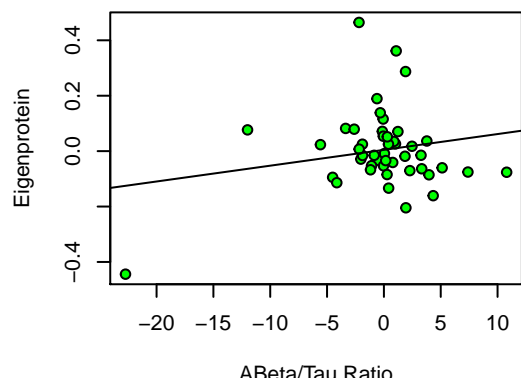

**bicor=-0.093, p=0.51**  
**cor=-0.0032, p=0.98**

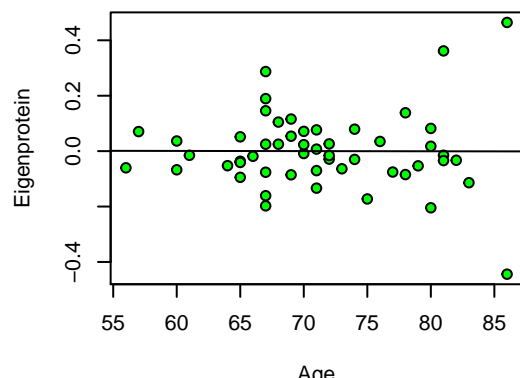

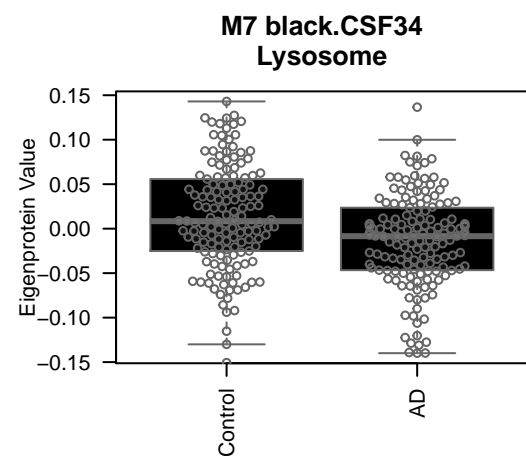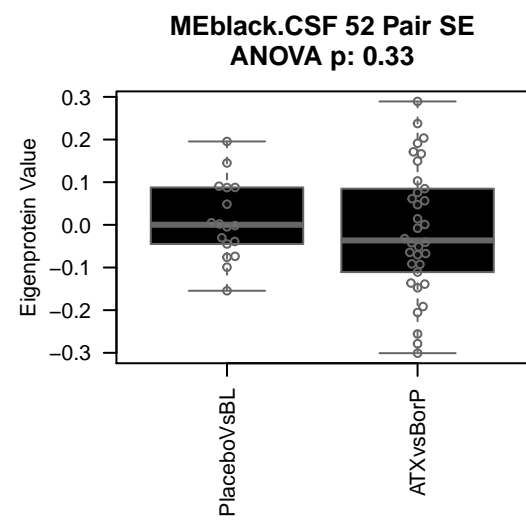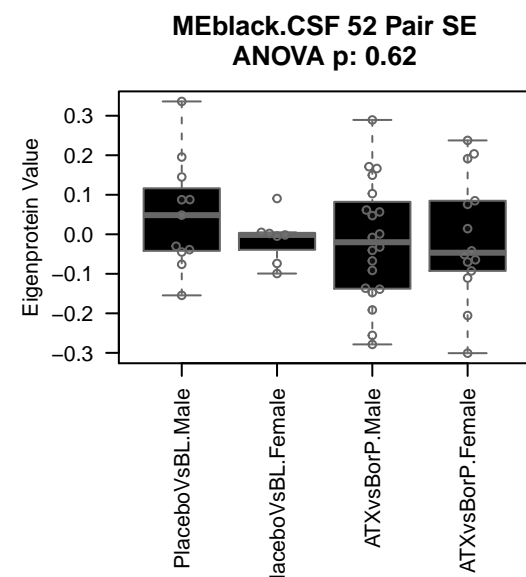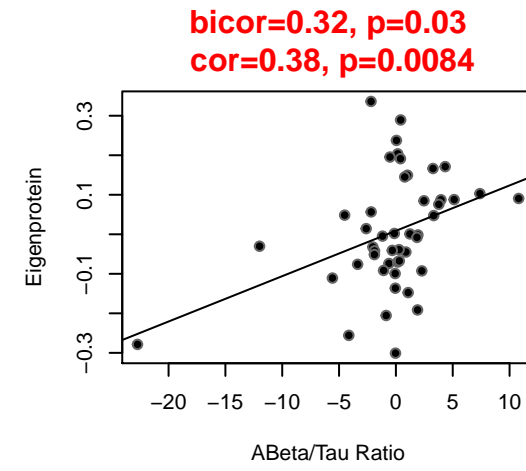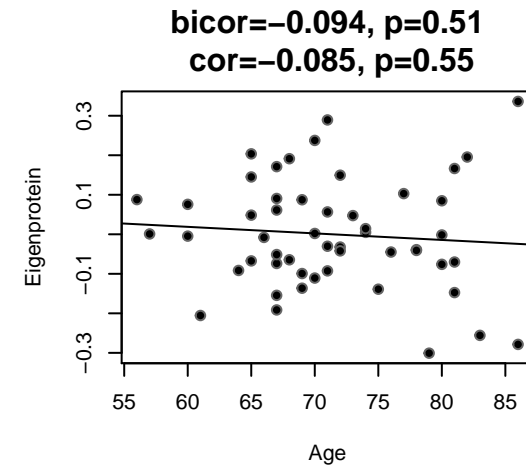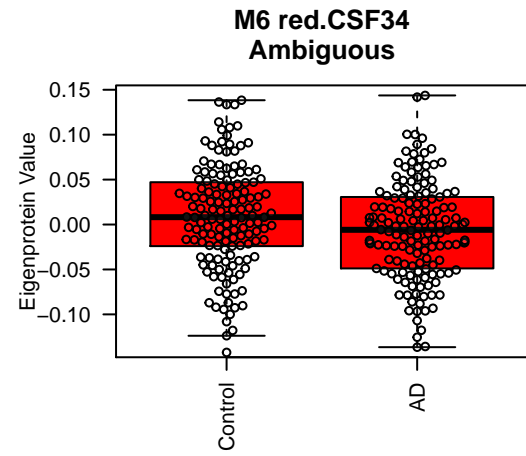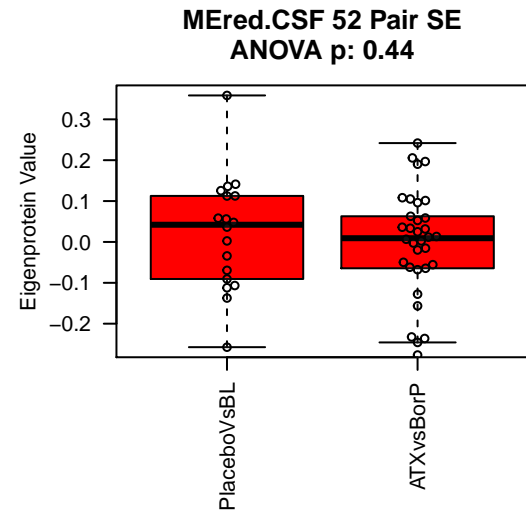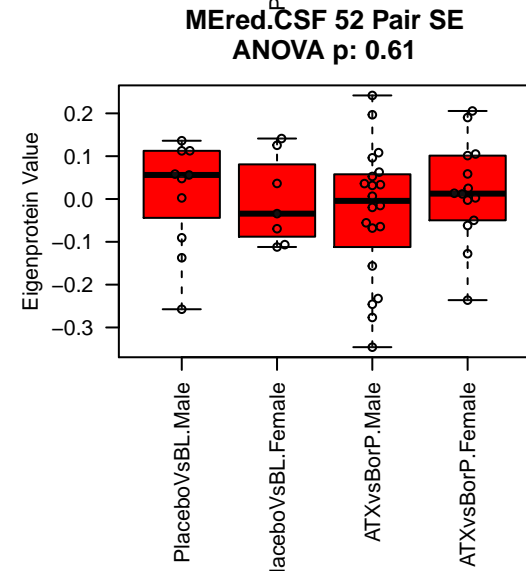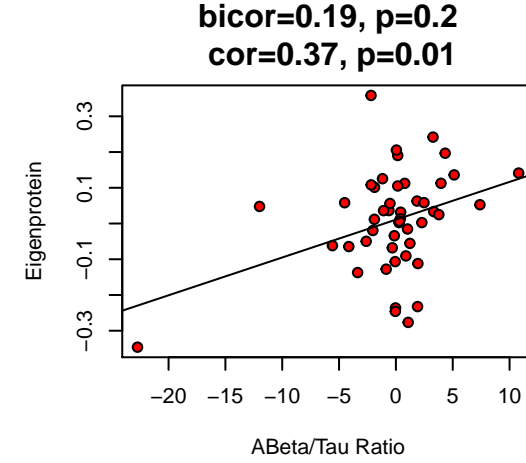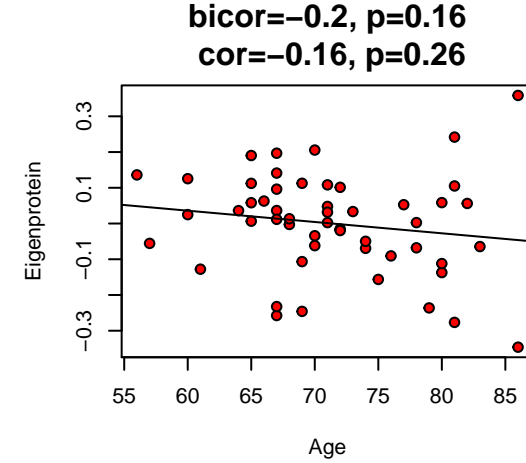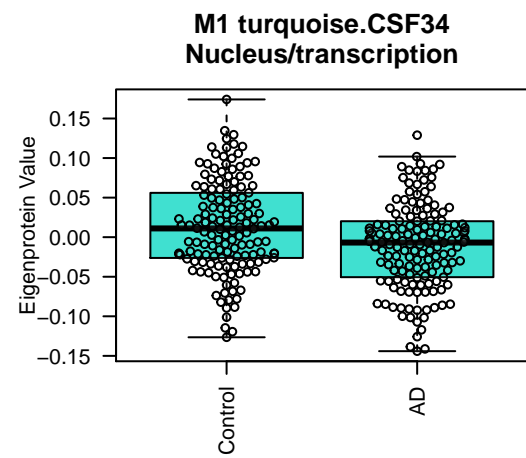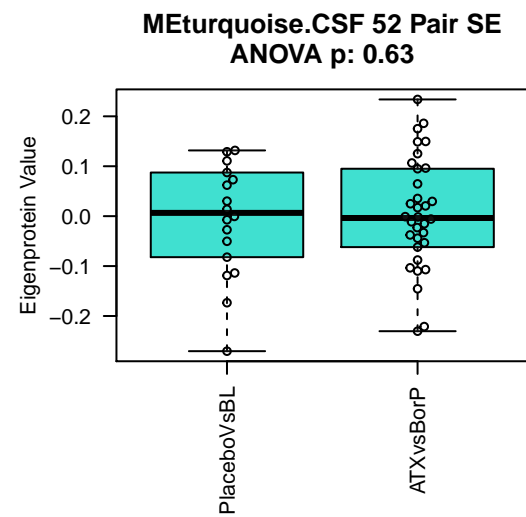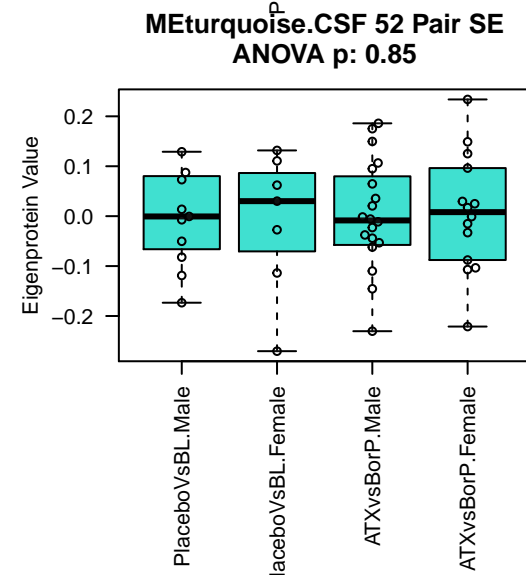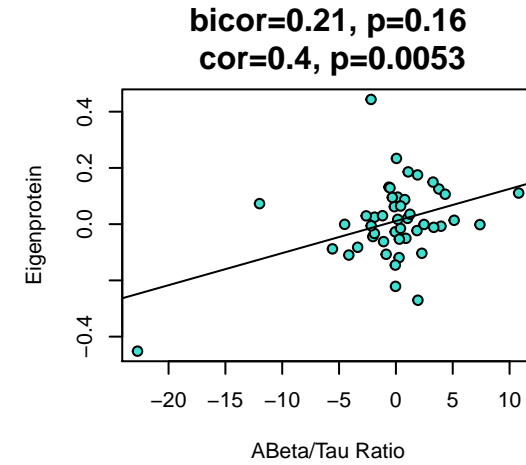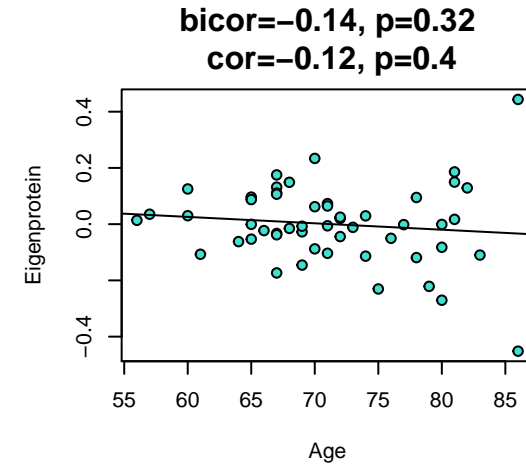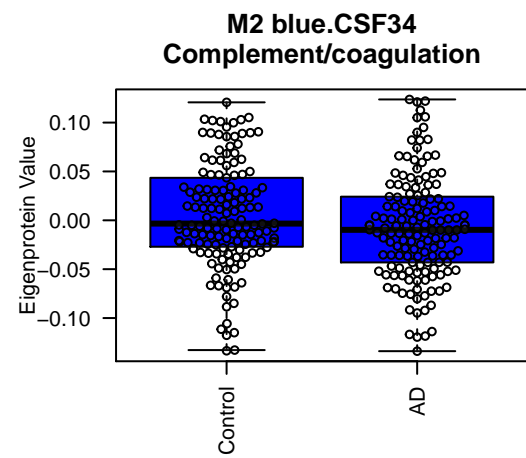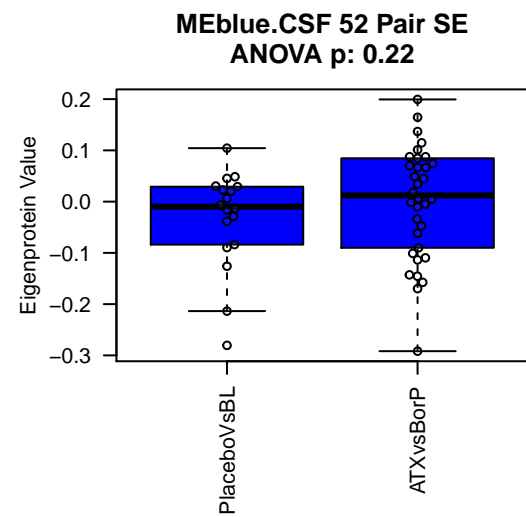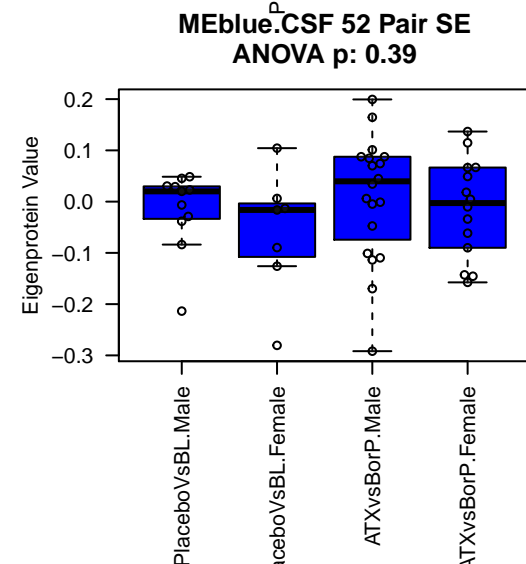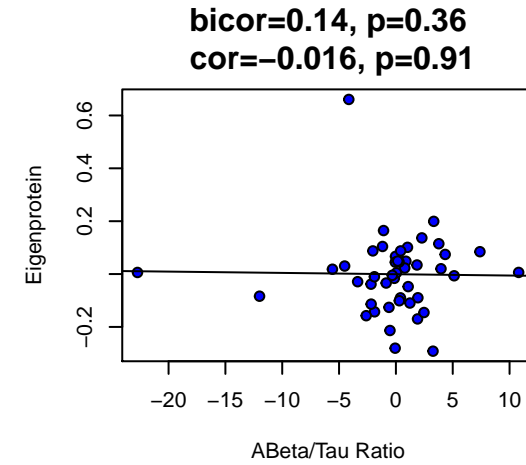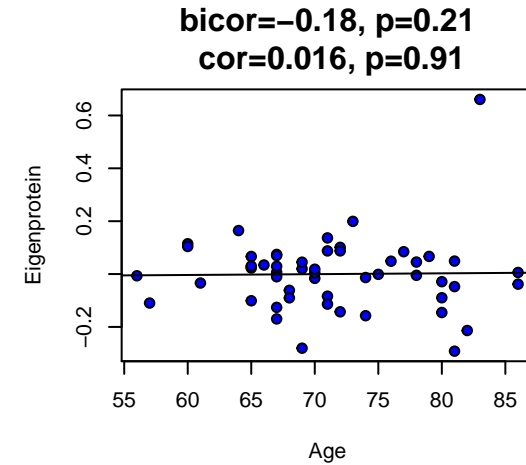

**M16 lightcyan.CSF34**  
Ambiguous

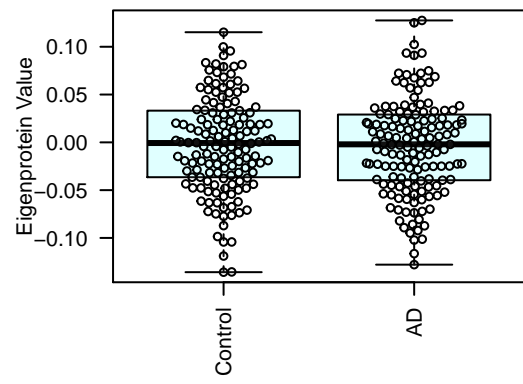

**MElightcyan.CSF 52 Pair SE**  
ANOVA p: 0.027

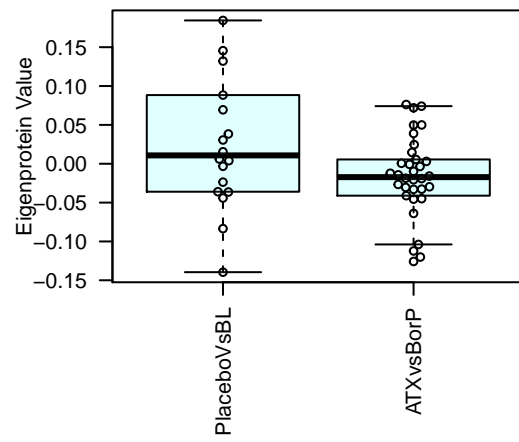

**MElightcyan.CSF 52 Pair SE**  
ANOVA p: 0.014

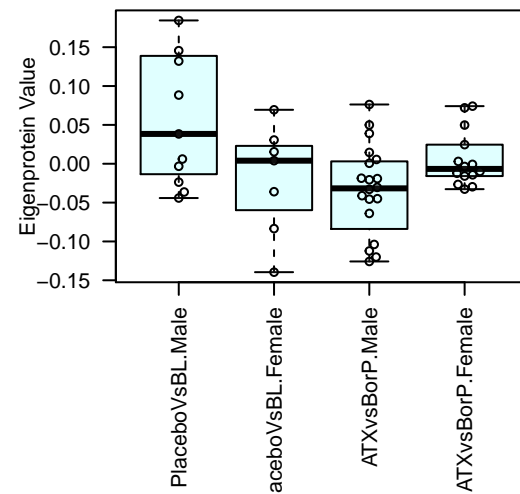

**bicor=-0.32, p=0.031**  
**cor=0.086, p=0.57**

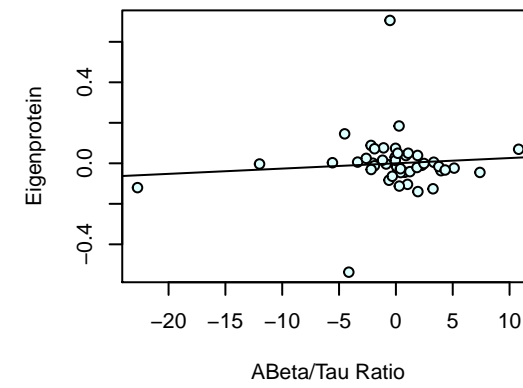

**bicor=0.013, p=0.93**  
**cor=0.023, p=0.87**

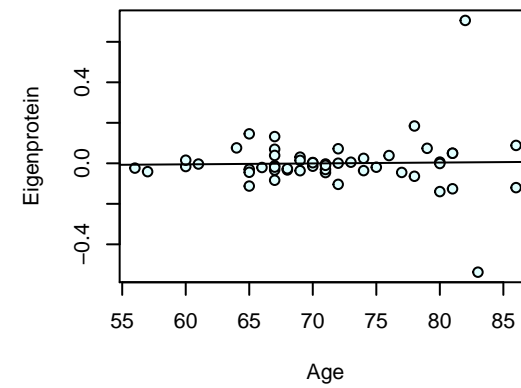

**M14 cyan.CSF34**  
Translation

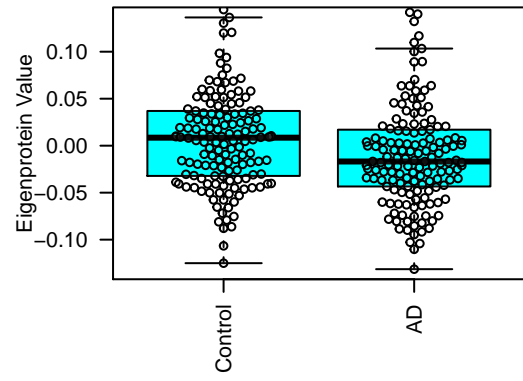

**MEcyan.CSF 52 Pair SE**  
ANOVA p: 0.043

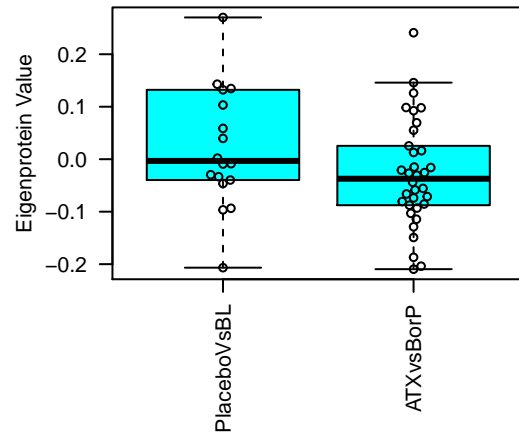

**MEcyan.CSF 52 Pair SE**  
ANOVA p: 0.048

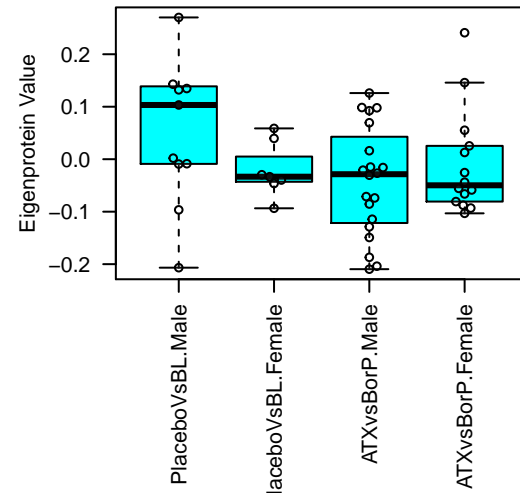

**bicor=-0.16, p=0.28**  
**cor=0.016, p=0.91**

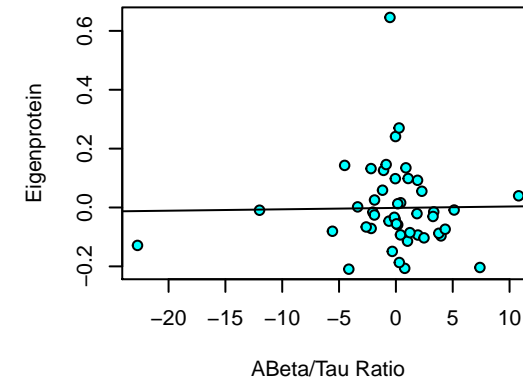

**bicor=-0.012, p=0.93**  
**cor=0.14, p=0.32**

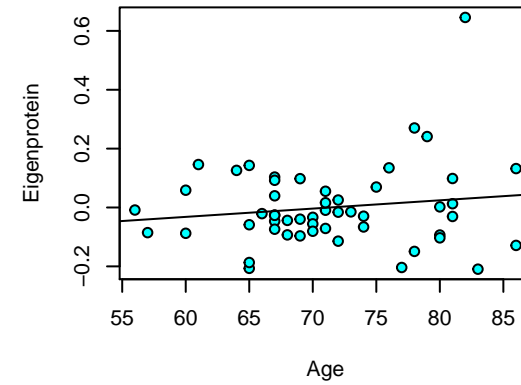

**M27 white.CSF34**  
Nucleosome

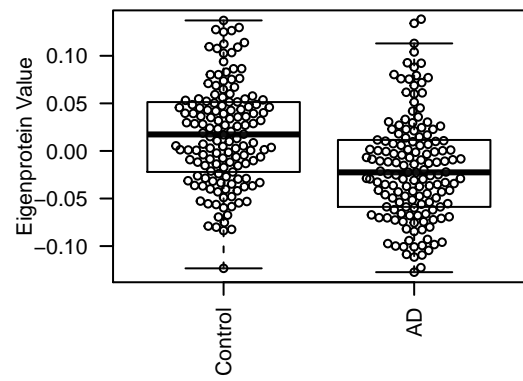

**MEwhite.CSF 52 Pair SE**  
ANOVA p: 0.098

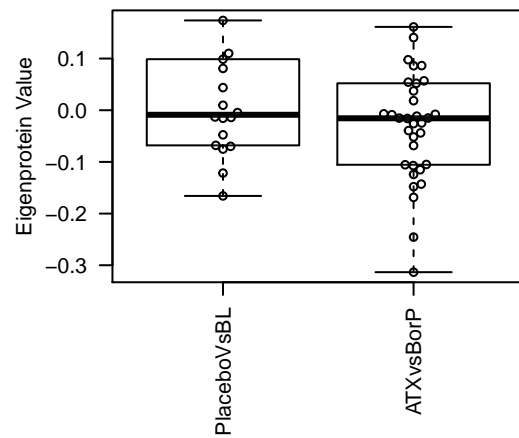

**MEwhite.CSF 52 Pair SE**  
ANOVA p: 0.031

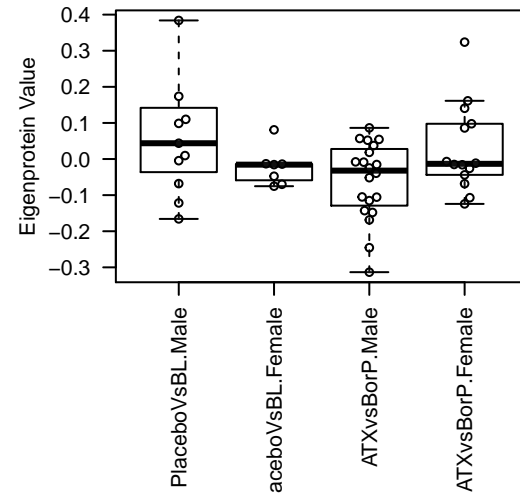

**bicor=-0.075, p=0.62**  
**cor=0.049, p=0.74**

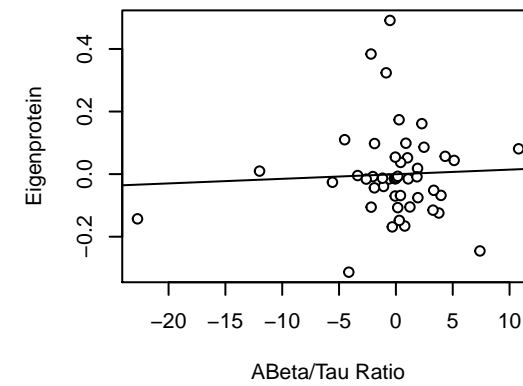

**bicor=-0.049, p=0.73**  
**cor=0.071, p=0.62**

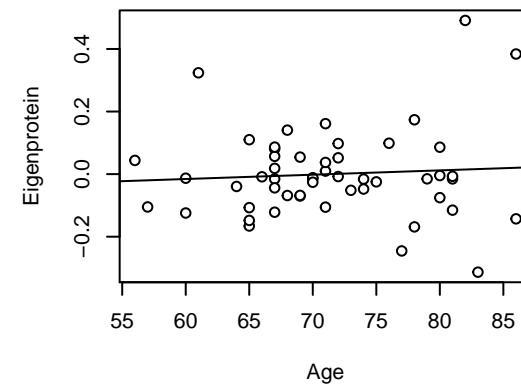

**M10 purple.CSF34**  
Golgi/glycosylation

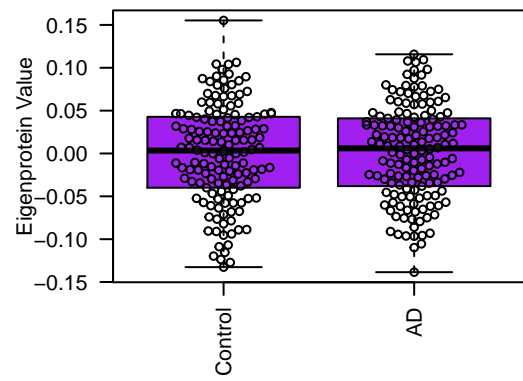

**MEpurple.CSF 52 Pair SE**  
ANOVA p: 0.3

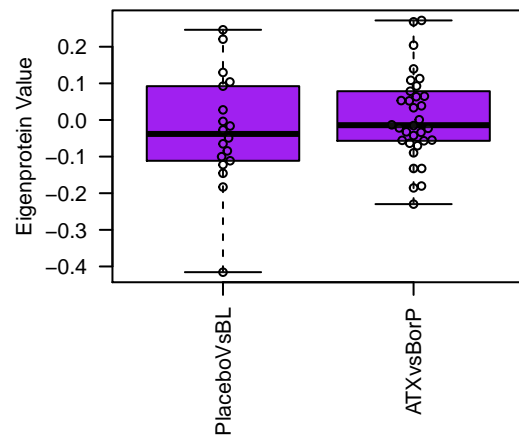

**MEpurple.CSF 52 Pair SE**  
ANOVA p: 0.62

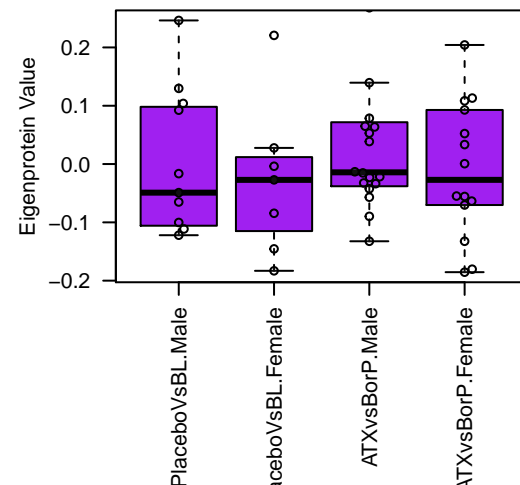

**bicor=-0.17, p=0.26**  
**cor=-0.34, p=0.019**

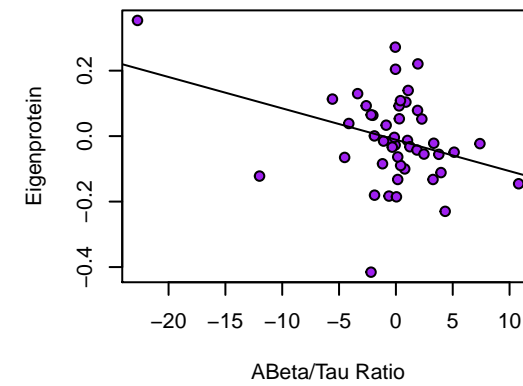

**bicor=0.27, p=0.054**  
**cor=0.2, p=0.16**

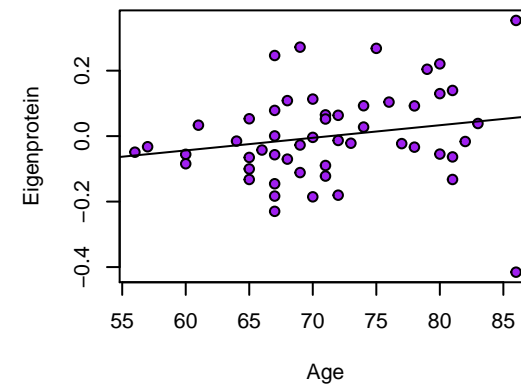

**M20 royalblue.CSF34**  
Glycolysis/Redox Homeostasis

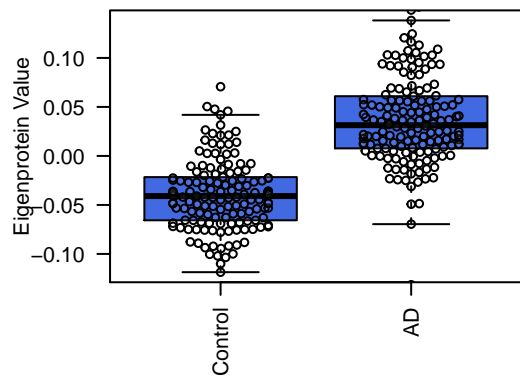

**MEroyalblue.CSF 52 Pair SE**  
ANOVA p: 0.04

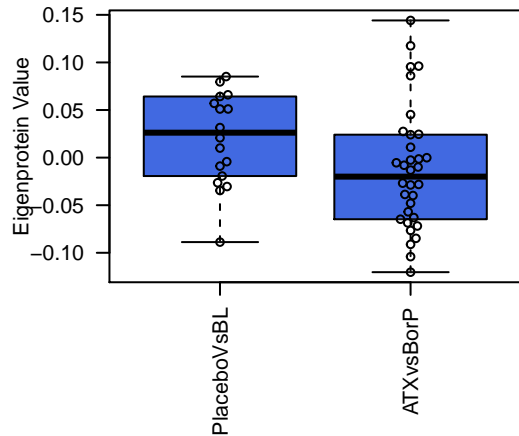

**MEroyalblue.CSF 52 Pair SE**  
ANOVA p: 0.12

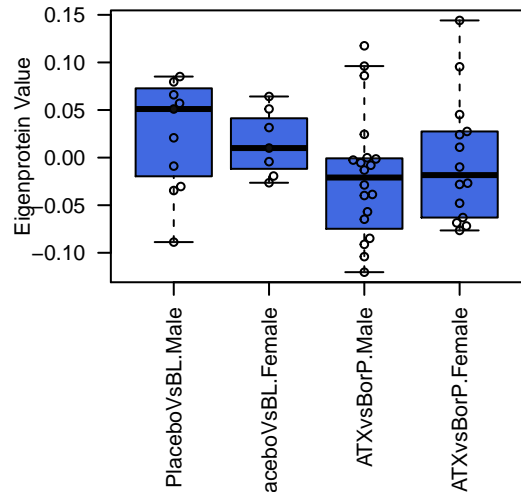

**bicor=-0.21, p=0.15**  
**cor=0.026, p=0.86**

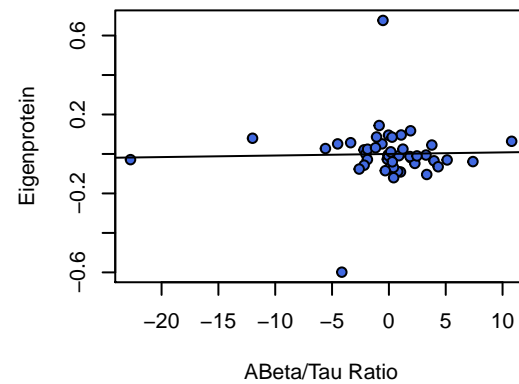

**bicor=-0.048, p=0.73**  
**cor=-0.018, p=0.9**

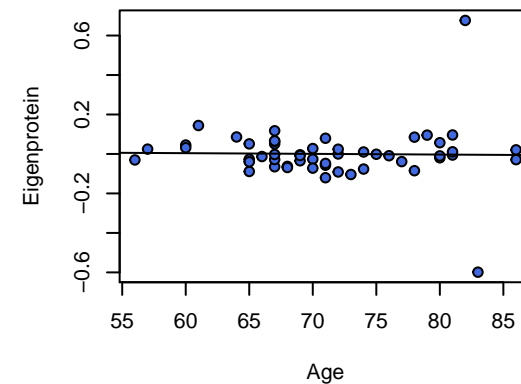

**M30 steelblue.CSF34**  
Viral endocytosis

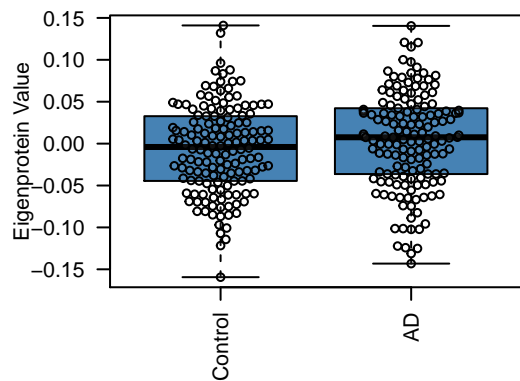

**MEsteelblue.CSF 52 Pair SE**  
ANOVA p: 0.32

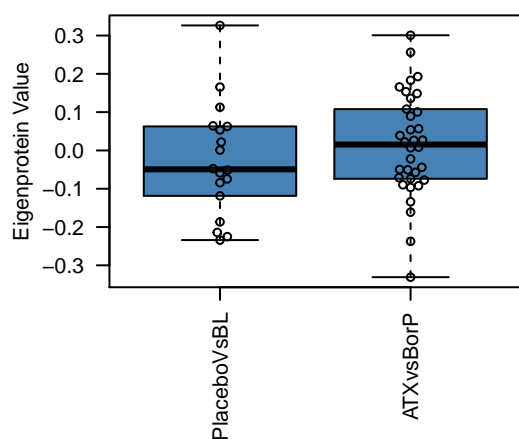

**MEsteelblue.CSF 52 Pair SE**  
ANOVA p: 0.67

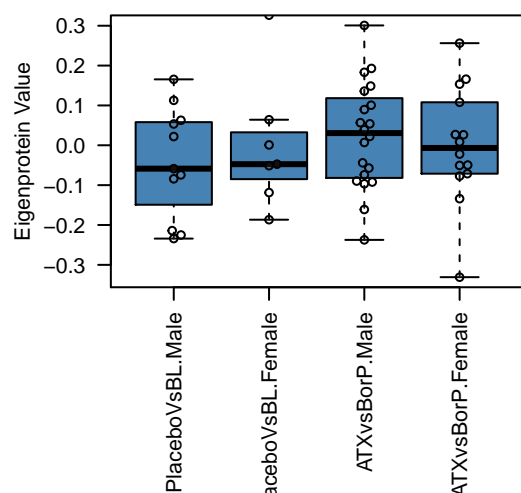

**bicor=-0.016, p=0.91**  
**cor=-0.15, p=0.31**

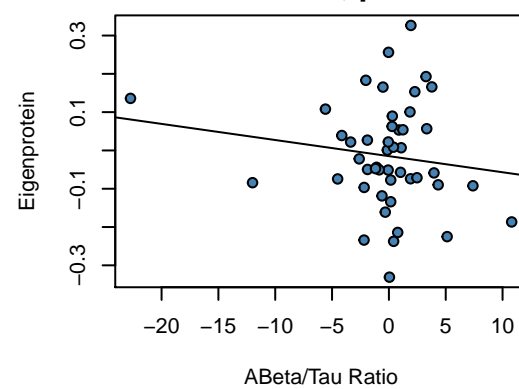

**bicor=0.23, p=0.1**  
**cor=0.23, p=0.1**

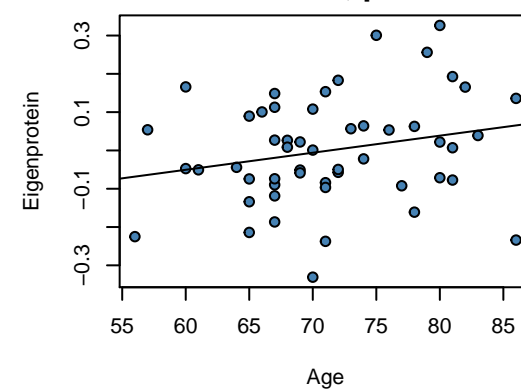

**M18 lightgreen.CSF34**  
Ambiguous

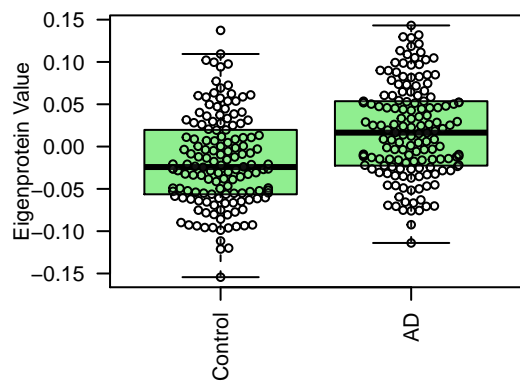

**MElightgreen.CSF 52 Pair SE**  
ANOVA p: 0.5

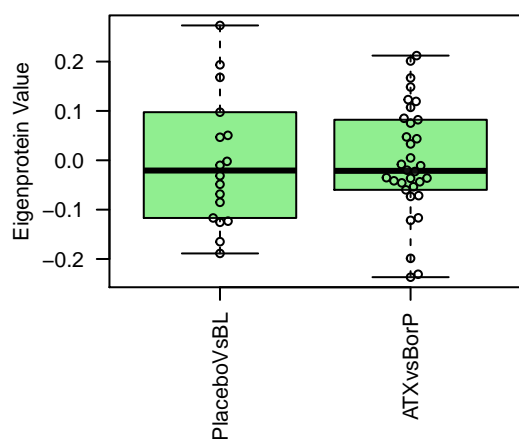

**MElightgreen.CSF 52 Pair SE**  
ANOVA p: 0.45

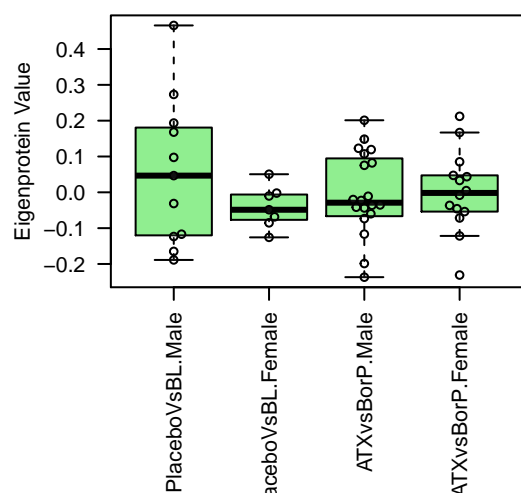

**bicor=-0.18, p=0.22**  
**cor=-0.19, p=0.2**

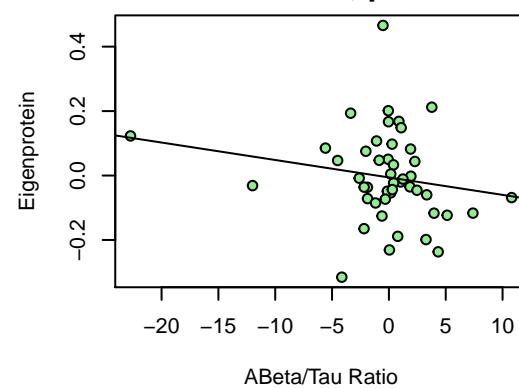

**bicor=0.093, p=0.51**  
**cor=0.1, p=0.48**

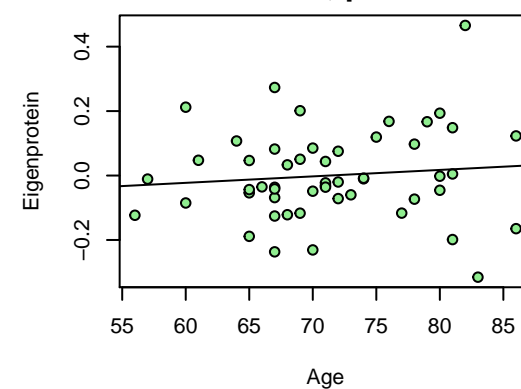

**M12 tan.CSF34**  
Ambiguous

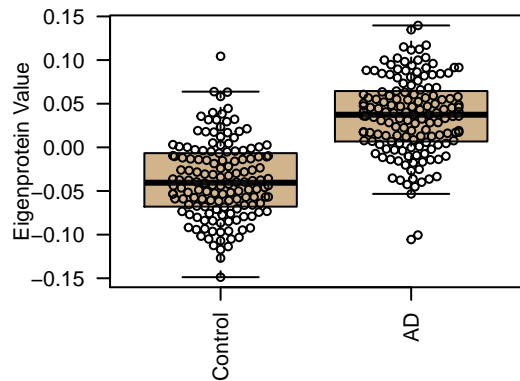

**MEtan.CSF 52 Pair SE**  
ANOVA p: 0.22

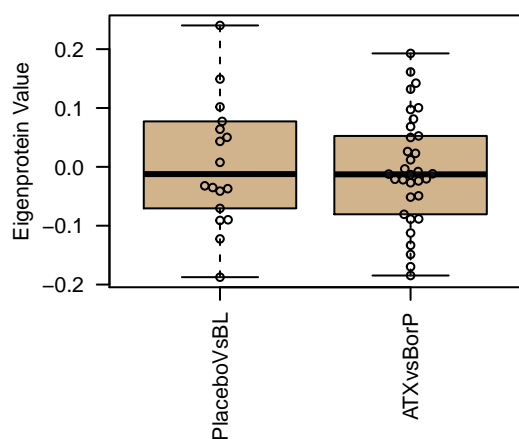

**MEtan.CSF 52 Pair SE**  
ANOVA p: 0.42

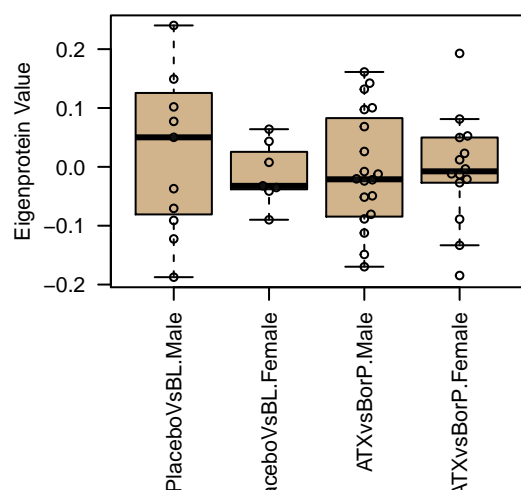

**bicor=-0.19, p=0.2**  
**cor=-0.14, p=0.35**

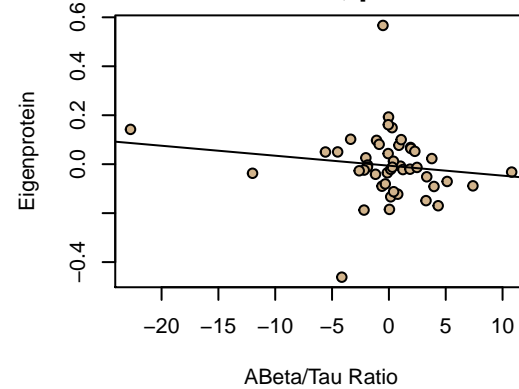

**bicor=0.097, p=0.5**  
**cor=0.093, p=0.51**

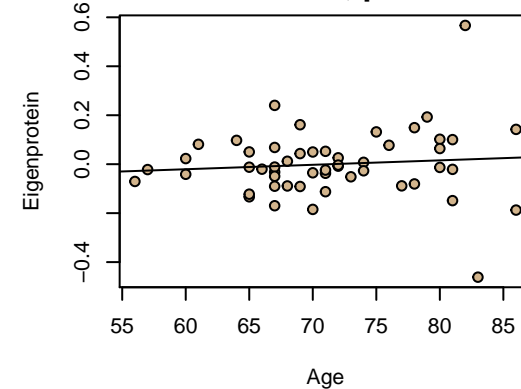

**M21 darkred.CSF34**  
ECM/Vasculature

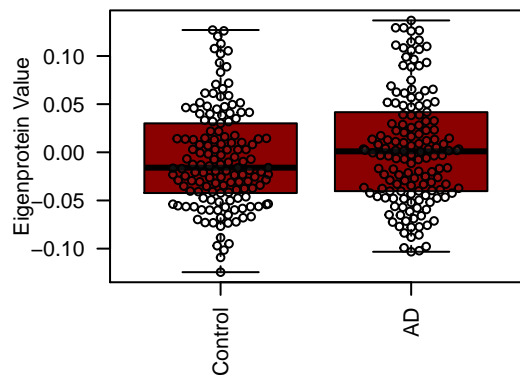

**MEdarkred.CSF 52 Pair SE**  
ANOVA p: 0.049

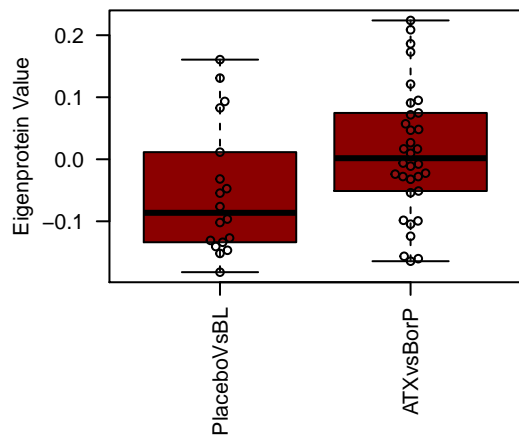

**MEdarkred.CSF 52 Pair SE**  
ANOVA p: 0.28

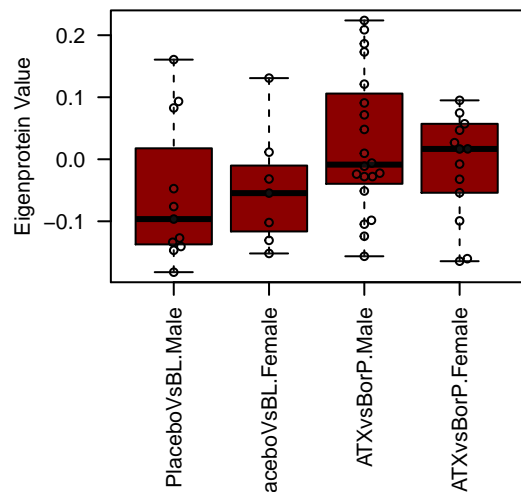

**bicor=-0.2, p=0.19**  
**cor=-0.15, p=0.31**

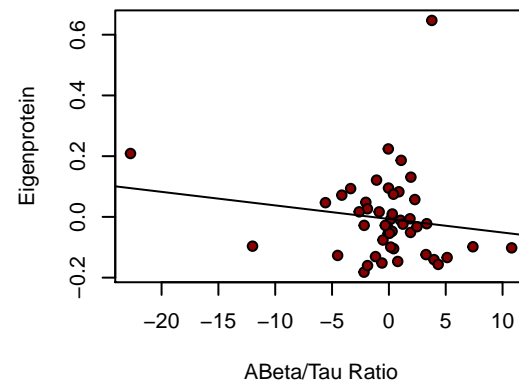

**bicor=0.2, p=0.16**  
**cor=0.0015, p=0.99**

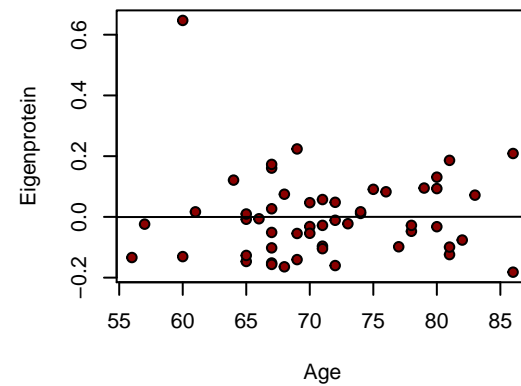

**M31 paleturquoise.CSF34**  
Actin cytoskeleton

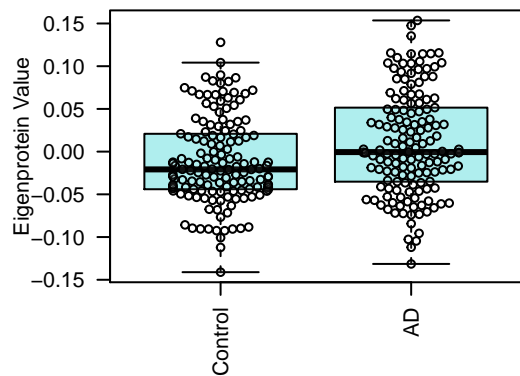

**MEpaleturquoise.CSF 52 Pair SE**  
ANOVA p: 1

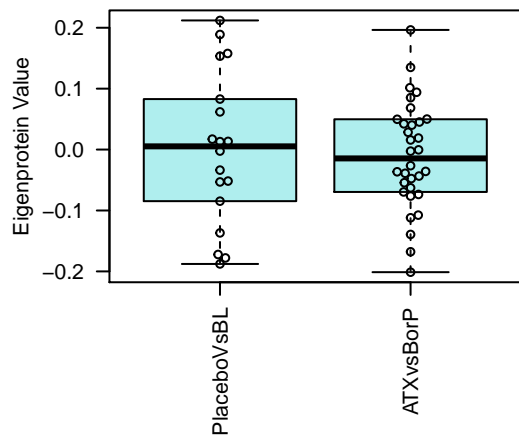

**MEpaleturquoise.CSF 52 Pair SE**  
ANOVA p: 0.34

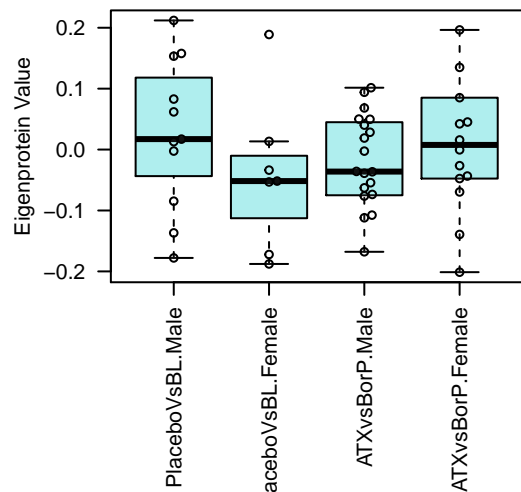

**bicor=-0.42, p=0.0034**  
**cor=-0.16, p=0.28**

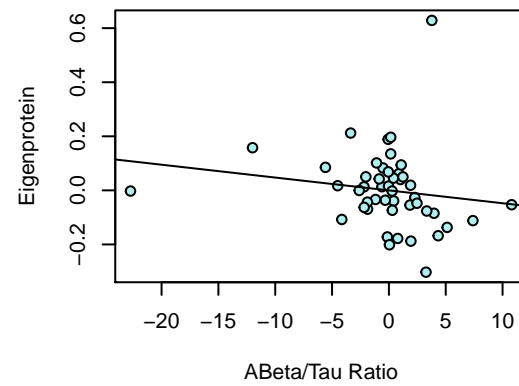

**bicor=0.017, p=0.9**  
**cor=-0.13, p=0.36**

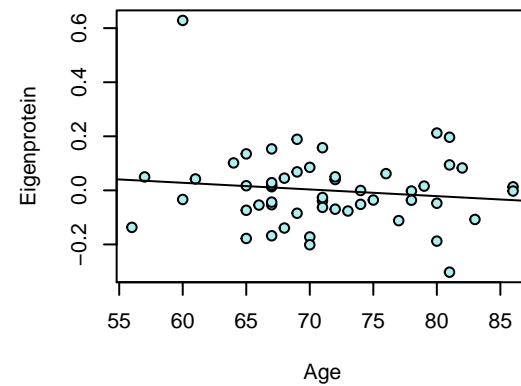

**M25 orange.CSF34**  
Ambiguous

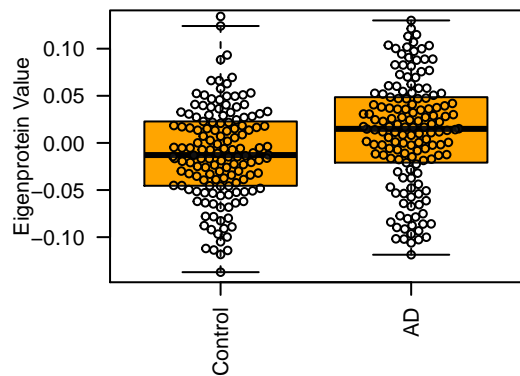

**MEorange.CSF 52 Pair SE**  
ANOVA p: 0.1

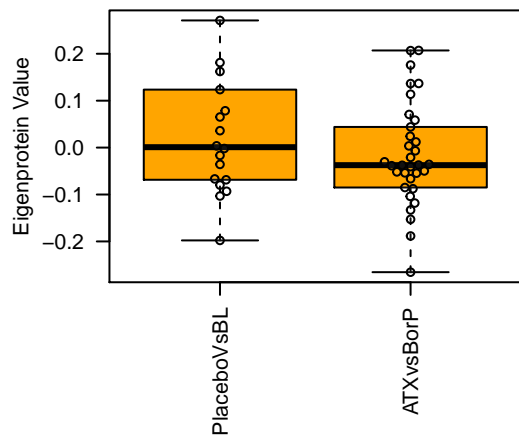

**MEorange.CSF 52 Pair SE**  
ANOVA p: 0.079

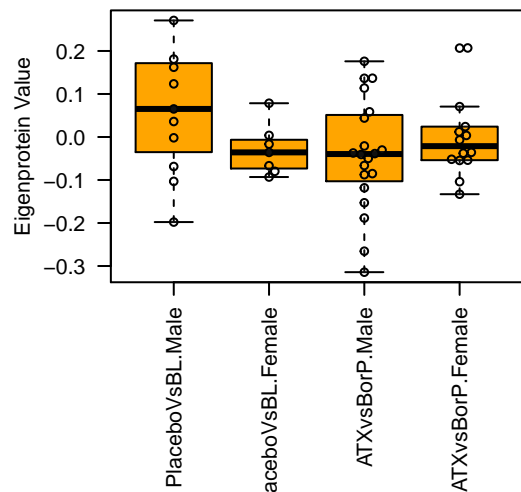

**bicor=-0.27, p=0.065**  
**cor=-0.068, p=0.65**

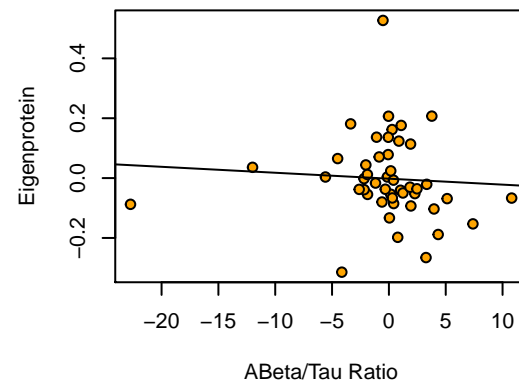

**bicor=-0.012, p=0.93**  
**cor=0.053, p=0.71**

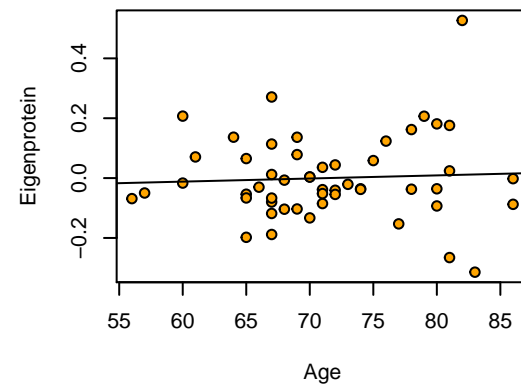

**M29 saddlebrown.CSF34**  
Cadherin/Cytoskeleton

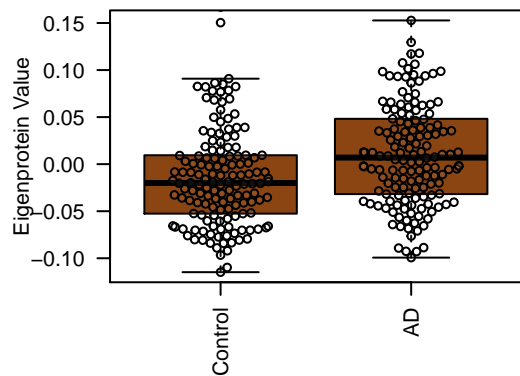

**MEsaddlebrown.CSF 52 Pair SE**  
ANOVA p: 0.093

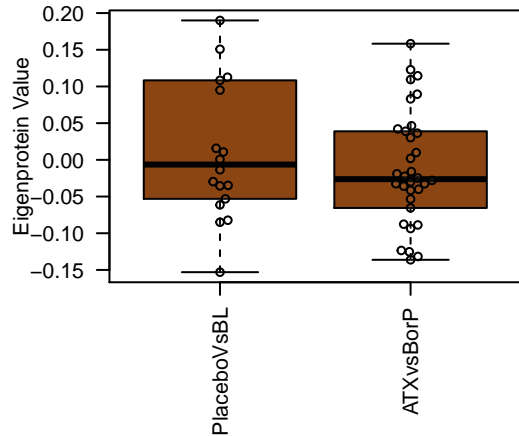

**MEsaddlebrown.CSF 52 Pair SE**  
ANOVA p: 0.076

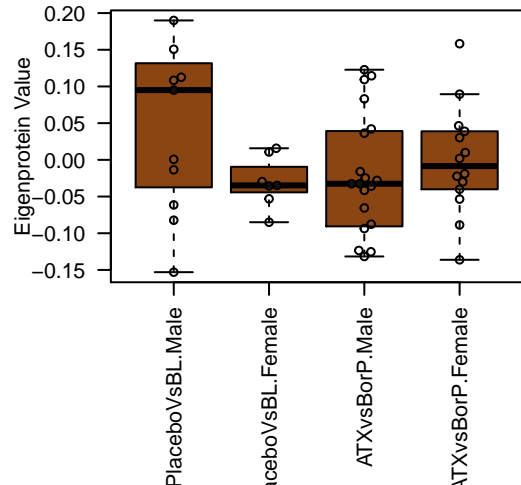

**bicor=-0.27, p=0.068**  
**cor=-0.03, p=0.84**

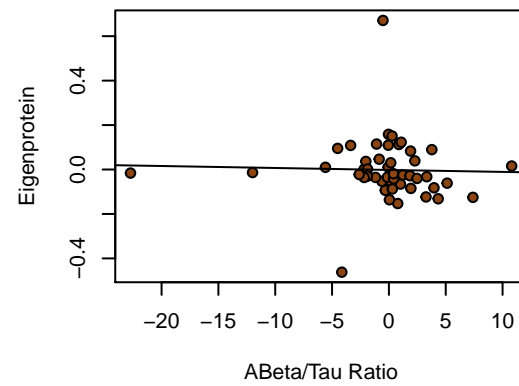

**bicor=0.059, p=0.68**  
**cor=0.08, p=0.57**

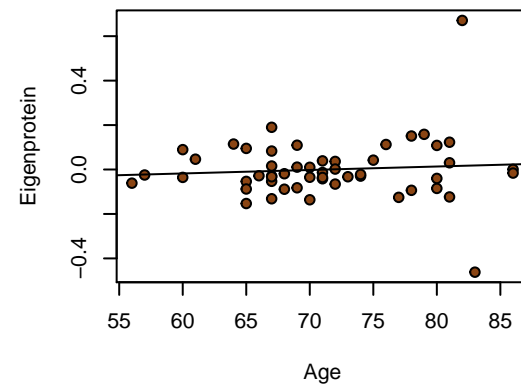

Supplement: media-2.pdf [file media-2.pdf]
